# Supplementary material
Source: PubMed Central journal article supplement (PMC11422824)
Supplement: media-1.pdf [file media-1.pdf]

Data Dictionary Codebook

**Round 2- RECOVER Pediatric PCORnet Chart Review Form (PID: 56148)**

01/10/2024 5:18pm

Instruments

| # | Variable / Field Name                                                                                | Field Label<br><i>Field Note</i>                                                                                                                                                | Field Attributes (Field Type, Validation, Choices, Calculations, etc.)                                                                                                                                                                                                                                                                                                                       |   |                                |   |                                                                                       |   |                           |   |                              |   |                          |   |                      |
|---|------------------------------------------------------------------------------------------------------|---------------------------------------------------------------------------------------------------------------------------------------------------------------------------------|----------------------------------------------------------------------------------------------------------------------------------------------------------------------------------------------------------------------------------------------------------------------------------------------------------------------------------------------------------------------------------------------|---|--------------------------------|---|---------------------------------------------------------------------------------------|---|---------------------------|---|------------------------------|---|--------------------------|---|----------------------|
| 1 | <b>record_id</b>                                                                                     | Record ID                                                                                                                                                                       | text                                                                                                                                                                                                                                                                                                                                                                                         |   |                                |   |                                                                                       |   |                           |   |                              |   |                          |   |                      |
| 2 | <b>chart_reviewer</b>                                                                                | Chart Reviewer Information: Please enter your first and last name; if the Coordinating Center has questions about the chart review, we may reach out with additional questions. | text, Required                                                                                                                                                                                                                                                                                                                                                                               |   |                                |   |                                                                                       |   |                           |   |                              |   |                          |   |                      |
| 3 | <b>approx_entry</b>                                                                                  | Section Header: <i>Section 1. Inclusion/Exclusion Criteria</i><br>Approximate Date of Cohort Entry:                                                                             | text (date_mdy), Required<br>Field Annotation: @HIDEBUTTON                                                                                                                                                                                                                                                                                                                                   |   |                                |   |                                                                                       |   |                           |   |                              |   |                          |   |                      |
| 4 | <b>covid</b>                                                                                         | Did this patient have COVID-19?                                                                                                                                                 | yesno, Required<br><table border="1"> <tr> <td>1</td> <td>Yes</td> </tr> <tr> <td>0</td> <td>No</td> </tr> </table>                                                                                                                                                                                                                                                                          | 1 | Yes                            | 0 | No                                                                                    |   |                           |   |                              |   |                          |   |                      |
| 1 | Yes                                                                                                  |                                                                                                                                                                                 |                                                                                                                                                                                                                                                                                                                                                                                              |   |                                |   |                                                                                       |   |                           |   |                              |   |                          |   |                      |
| 0 | No                                                                                                   |                                                                                                                                                                                 |                                                                                                                                                                                                                                                                                                                                                                                              |   |                                |   |                                                                                       |   |                           |   |                              |   |                          |   |                      |
| 5 | <b>coviddiagnosis_method</b><br><br>Show the field ONLY if: [covid] = '1'                            | How was the diagnosis made?                                                                                                                                                     | dropdown, Required<br><table border="1"> <tr> <td>1</td> <td>Based on PCR result</td> </tr> <tr> <td>2</td> <td>Based on antigen result</td> </tr> <tr> <td>3</td> <td>Based on serology testing</td> </tr> <tr> <td>4</td> <td>Based on diagnosis code only</td> </tr> <tr> <td>5</td> <td>Self-reported by patient</td> </tr> <tr> <td>6</td> <td>Unsure/Not available</td> </tr> </table> | 1 | Based on PCR result            | 2 | Based on antigen result                                                               | 3 | Based on serology testing | 4 | Based on diagnosis code only | 5 | Self-reported by patient | 6 | Unsure/Not available |
| 1 | Based on PCR result                                                                                  |                                                                                                                                                                                 |                                                                                                                                                                                                                                                                                                                                                                                              |   |                                |   |                                                                                       |   |                           |   |                              |   |                          |   |                      |
| 2 | Based on antigen result                                                                              |                                                                                                                                                                                 |                                                                                                                                                                                                                                                                                                                                                                                              |   |                                |   |                                                                                       |   |                           |   |                              |   |                          |   |                      |
| 3 | Based on serology testing                                                                            |                                                                                                                                                                                 |                                                                                                                                                                                                                                                                                                                                                                                              |   |                                |   |                                                                                       |   |                           |   |                              |   |                          |   |                      |
| 4 | Based on diagnosis code only                                                                         |                                                                                                                                                                                 |                                                                                                                                                                                                                                                                                                                                                                                              |   |                                |   |                                                                                       |   |                           |   |                              |   |                          |   |                      |
| 5 | Self-reported by patient                                                                             |                                                                                                                                                                                 |                                                                                                                                                                                                                                                                                                                                                                                              |   |                                |   |                                                                                       |   |                           |   |                              |   |                          |   |                      |
| 6 | Unsure/Not available                                                                                 |                                                                                                                                                                                 |                                                                                                                                                                                                                                                                                                                                                                                              |   |                                |   |                                                                                       |   |                           |   |                              |   |                          |   |                      |
| 6 | <b>coviddiagnosis_date</b><br><br>Show the field ONLY if: [covid] = '1'                              | Enter the date the first COVID-19 diagnosis was made: (Note: this date will be what you use as the Index Date in below sections)                                                | text (date_mdy), Required<br>Field Annotation: @HIDEBUTTON                                                                                                                                                                                                                                                                                                                                   |   |                                |   |                                                                                       |   |                           |   |                              |   |                          |   |                      |
| 7 | <b>pcr_test_type</b><br><br>Show the field ONLY if: [covid] = '1' and [coviddiagnosis_method] = '1'  | Enter the type of PCR test:                                                                                                                                                     | dropdown, Required<br><table border="1"> <tr> <td>1</td> <td>Single PCR test for SARS-CoV-2</td> </tr> <tr> <td>2</td> <td>Multiplex PCR test which tested other respiratory pathogens in addition to SARS-CoV-2</td> </tr> <tr> <td>3</td> <td>Unknown/Unavailable</td> </tr> </table>                                                                                                      | 1 | Single PCR test for SARS-CoV-2 | 2 | Multiplex PCR test which tested other respiratory pathogens in addition to SARS-CoV-2 | 3 | Unknown/Unavailable       |   |                              |   |                          |   |                      |
| 1 | Single PCR test for SARS-CoV-2                                                                       |                                                                                                                                                                                 |                                                                                                                                                                                                                                                                                                                                                                                              |   |                                |   |                                                                                       |   |                           |   |                              |   |                          |   |                      |
| 2 | Multiplex PCR test which tested other respiratory pathogens in addition to SARS-CoV-2                |                                                                                                                                                                                 |                                                                                                                                                                                                                                                                                                                                                                                              |   |                                |   |                                                                                       |   |                           |   |                              |   |                          |   |                      |
| 3 | Unknown/Unavailable                                                                                  |                                                                                                                                                                                 |                                                                                                                                                                                                                                                                                                                                                                                              |   |                                |   |                                                                                       |   |                           |   |                              |   |                          |   |                      |
| 8 | <b>other_pathogen</b><br><br>Show the field ONLY if: [covid] = '1' and [coviddiagnosis_method] = '1' | Did the patient have another respiratory pathogen identified within 7 days of the SARS CoV2 result?                                                                             | dropdown, Required<br><table border="1"> <tr> <td>1</td> <td>Yes, same day</td> </tr> <tr> <td>2</td> <td>Yes, not on same day but within 7 days of test</td> </tr> <tr> <td>3</td> <td>No</td> </tr> </table>                                                                                                                                                                               | 1 | Yes, same day                  | 2 | Yes, not on same day but within 7 days of test                                        | 3 | No                        |   |                              |   |                          |   |                      |
| 1 | Yes, same day                                                                                        |                                                                                                                                                                                 |                                                                                                                                                                                                                                                                                                                                                                                              |   |                                |   |                                                                                       |   |                           |   |                              |   |                          |   |                      |
| 2 | Yes, not on same day but within 7 days of test                                                       |                                                                                                                                                                                 |                                                                                                                                                                                                                                                                                                                                                                                              |   |                                |   |                                                                                       |   |                           |   |                              |   |                          |   |                      |
| 3 | No                                                                                                   |                                                                                                                                                                                 |                                                                                                                                                                                                                                                                                                                                                                                              |   |                                |   |                                                                                       |   |                           |   |                              |   |                          |   |                      |

|           |                                                                                                                             |                                                                                                          |                                                                                                                                                                                                                                                                                                                                                                                                                                                                                                                                                                                                                                                                                                                                                                                                                                                   |   |                                |            |                         |                          |                                     |   |                              |                    |                          |                          |                       |   |                          |                            |   |                          |                       |   |                          |                                                                                               |   |                          |              |
|-----------|-----------------------------------------------------------------------------------------------------------------------------|----------------------------------------------------------------------------------------------------------|---------------------------------------------------------------------------------------------------------------------------------------------------------------------------------------------------------------------------------------------------------------------------------------------------------------------------------------------------------------------------------------------------------------------------------------------------------------------------------------------------------------------------------------------------------------------------------------------------------------------------------------------------------------------------------------------------------------------------------------------------------------------------------------------------------------------------------------------------|---|--------------------------------|------------|-------------------------|--------------------------|-------------------------------------|---|------------------------------|--------------------|--------------------------|--------------------------|-----------------------|---|--------------------------|----------------------------|---|--------------------------|-----------------------|---|--------------------------|-----------------------------------------------------------------------------------------------|---|--------------------------|--------------|
| <p>9</p>  | <p><b>respiratory_pathogens</b></p> <p>Show the field ONLY if:<br/>[other_pathogen] = '1' or<br/>[other_pathogen] = '2'</p> | <p>If yes, include name(s) of other respiratory pathogen (select all that apply from the following):</p> | <p>checkbox, Required</p> <table border="1"> <tr> <td>1</td> <td>respiratory_pathogens__1</td> <td>Adenovirus</td> </tr> <tr> <td>2</td> <td>respiratory_pathogens__2</td> <td>Seasonal Coron (229E, HKU1, N OC43)</td> </tr> <tr> <td>3</td> <td>respiratory_pathogens__3</td> <td>Human Metapneumovi</td> </tr> <tr> <td>4</td> <td>respiratory_pathogens__4</td> <td>Human Rhinovirus/Ente</td> </tr> <tr> <td>5</td> <td>respiratory_pathogens__5</td> <td>Parainfluenza v 1,2,3 or 4</td> </tr> <tr> <td>6</td> <td>respiratory_pathogens__6</td> <td>Respiratory syr virus</td> </tr> <tr> <td>7</td> <td>respiratory_pathogens__7</td> <td>Bacteria (Borde parapertussis, Bordetella pert Chlamydia pneumoniae or Mycoplasma pneumoniae)</td> </tr> <tr> <td>8</td> <td>respiratory_pathogens__8</td> <td>Unknown/Unav</td> </tr> </table> | 1 | respiratory_pathogens__1       | Adenovirus | 2                       | respiratory_pathogens__2 | Seasonal Coron (229E, HKU1, N OC43) | 3 | respiratory_pathogens__3     | Human Metapneumovi | 4                        | respiratory_pathogens__4 | Human Rhinovirus/Ente | 5 | respiratory_pathogens__5 | Parainfluenza v 1,2,3 or 4 | 6 | respiratory_pathogens__6 | Respiratory syr virus | 7 | respiratory_pathogens__7 | Bacteria (Borde parapertussis, Bordetella pert Chlamydia pneumoniae or Mycoplasma pneumoniae) | 8 | respiratory_pathogens__8 | Unknown/Unav |
| 1         | respiratory_pathogens__1                                                                                                    | Adenovirus                                                                                               |                                                                                                                                                                                                                                                                                                                                                                                                                                                                                                                                                                                                                                                                                                                                                                                                                                                   |   |                                |            |                         |                          |                                     |   |                              |                    |                          |                          |                       |   |                          |                            |   |                          |                       |   |                          |                                                                                               |   |                          |              |
| 2         | respiratory_pathogens__2                                                                                                    | Seasonal Coron (229E, HKU1, N OC43)                                                                      |                                                                                                                                                                                                                                                                                                                                                                                                                                                                                                                                                                                                                                                                                                                                                                                                                                                   |   |                                |            |                         |                          |                                     |   |                              |                    |                          |                          |                       |   |                          |                            |   |                          |                       |   |                          |                                                                                               |   |                          |              |
| 3         | respiratory_pathogens__3                                                                                                    | Human Metapneumovi                                                                                       |                                                                                                                                                                                                                                                                                                                                                                                                                                                                                                                                                                                                                                                                                                                                                                                                                                                   |   |                                |            |                         |                          |                                     |   |                              |                    |                          |                          |                       |   |                          |                            |   |                          |                       |   |                          |                                                                                               |   |                          |              |
| 4         | respiratory_pathogens__4                                                                                                    | Human Rhinovirus/Ente                                                                                    |                                                                                                                                                                                                                                                                                                                                                                                                                                                                                                                                                                                                                                                                                                                                                                                                                                                   |   |                                |            |                         |                          |                                     |   |                              |                    |                          |                          |                       |   |                          |                            |   |                          |                       |   |                          |                                                                                               |   |                          |              |
| 5         | respiratory_pathogens__5                                                                                                    | Parainfluenza v 1,2,3 or 4                                                                               |                                                                                                                                                                                                                                                                                                                                                                                                                                                                                                                                                                                                                                                                                                                                                                                                                                                   |   |                                |            |                         |                          |                                     |   |                              |                    |                          |                          |                       |   |                          |                            |   |                          |                       |   |                          |                                                                                               |   |                          |              |
| 6         | respiratory_pathogens__6                                                                                                    | Respiratory syr virus                                                                                    |                                                                                                                                                                                                                                                                                                                                                                                                                                                                                                                                                                                                                                                                                                                                                                                                                                                   |   |                                |            |                         |                          |                                     |   |                              |                    |                          |                          |                       |   |                          |                            |   |                          |                       |   |                          |                                                                                               |   |                          |              |
| 7         | respiratory_pathogens__7                                                                                                    | Bacteria (Borde parapertussis, Bordetella pert Chlamydia pneumoniae or Mycoplasma pneumoniae)            |                                                                                                                                                                                                                                                                                                                                                                                                                                                                                                                                                                                                                                                                                                                                                                                                                                                   |   |                                |            |                         |                          |                                     |   |                              |                    |                          |                          |                       |   |                          |                            |   |                          |                       |   |                          |                                                                                               |   |                          |              |
| 8         | respiratory_pathogens__8                                                                                                    | Unknown/Unav                                                                                             |                                                                                                                                                                                                                                                                                                                                                                                                                                                                                                                                                                                                                                                                                                                                                                                                                                                   |   |                                |            |                         |                          |                                     |   |                              |                    |                          |                          |                       |   |                          |                            |   |                          |                       |   |                          |                                                                                               |   |                          |              |
| <p>10</p> | <p><b>coviddiagnosis_age</b></p> <p>Show the field ONLY if:<br/>[covid] = '1'</p>                                           | <p>Select the patient's age range at first COVID-19 diagnosis:</p>                                       | <p>dropdown, Required</p> <table border="1"> <tr> <td>1</td> <td>Under 3 years old</td> </tr> <tr> <td>2</td> <td>3 years or older</td> </tr> </table>                                                                                                                                                                                                                                                                                                                                                                                                                                                                                                                                                                                                                                                                                            | 1 | Under 3 years old              | 2          | 3 years or older        |                          |                                     |   |                              |                    |                          |                          |                       |   |                          |                            |   |                          |                       |   |                          |                                                                                               |   |                          |              |
| 1         | Under 3 years old                                                                                                           |                                                                                                          |                                                                                                                                                                                                                                                                                                                                                                                                                                                                                                                                                                                                                                                                                                                                                                                                                                                   |   |                                |            |                         |                          |                                     |   |                              |                    |                          |                          |                       |   |                          |                            |   |                          |                       |   |                          |                                                                                               |   |                          |              |
| 2         | 3 years or older                                                                                                            |                                                                                                          |                                                                                                                                                                                                                                                                                                                                                                                                                                                                                                                                                                                                                                                                                                                                                                                                                                                   |   |                                |            |                         |                          |                                     |   |                              |                    |                          |                          |                       |   |                          |                            |   |                          |                       |   |                          |                                                                                               |   |                          |              |
| <p>11</p> | <p><b>coviddiagnosis_multiple</b></p> <p>Show the field ONLY if:<br/>[covid] = '1'</p>                                      | <p>Did the patient have repeated COVID-19 (more than one SARS-CoV-2 infection)?</p>                      | <p>yesno, Required</p> <table border="1"> <tr> <td>1</td> <td>Yes</td> </tr> <tr> <td>0</td> <td>No</td> </tr> </table>                                                                                                                                                                                                                                                                                                                                                                                                                                                                                                                                                                                                                                                                                                                           | 1 | Yes                            | 0          | No                      |                          |                                     |   |                              |                    |                          |                          |                       |   |                          |                            |   |                          |                       |   |                          |                                                                                               |   |                          |              |
| 1         | Yes                                                                                                                         |                                                                                                          |                                                                                                                                                                                                                                                                                                                                                                                                                                                                                                                                                                                                                                                                                                                                                                                                                                                   |   |                                |            |                         |                          |                                     |   |                              |                    |                          |                          |                       |   |                          |                            |   |                          |                       |   |                          |                                                                                               |   |                          |              |
| 0         | No                                                                                                                          |                                                                                                          |                                                                                                                                                                                                                                                                                                                                                                                                                                                                                                                                                                                                                                                                                                                                                                                                                                                   |   |                                |            |                         |                          |                                     |   |                              |                    |                          |                          |                       |   |                          |                            |   |                          |                       |   |                          |                                                                                               |   |                          |              |
| <p>12</p> | <p><b>coviddiagnosis_method_2</b></p> <p>Show the field ONLY if:<br/>[covid] = '1' and [coviddiagnosis_multiple] = '1'</p>  | <p>How was the second diagnosis made?</p>                                                                | <p>dropdown, Required</p> <table border="1"> <tr> <td>1</td> <td>Based on PCR result</td> </tr> <tr> <td>2</td> <td>Based on antigen result</td> </tr> <tr> <td>3</td> <td>Based on serology testing</td> </tr> <tr> <td>4</td> <td>Based on diagnosis code only</td> </tr> <tr> <td>5</td> <td>Self-reported by patient</td> </tr> <tr> <td>6</td> <td>Unsure/Not available</td> </tr> </table>                                                                                                                                                                                                                                                                                                                                                                                                                                                  | 1 | Based on PCR result            | 2          | Based on antigen result | 3                        | Based on serology testing           | 4 | Based on diagnosis code only | 5                  | Self-reported by patient | 6                        | Unsure/Not available  |   |                          |                            |   |                          |                       |   |                          |                                                                                               |   |                          |              |
| 1         | Based on PCR result                                                                                                         |                                                                                                          |                                                                                                                                                                                                                                                                                                                                                                                                                                                                                                                                                                                                                                                                                                                                                                                                                                                   |   |                                |            |                         |                          |                                     |   |                              |                    |                          |                          |                       |   |                          |                            |   |                          |                       |   |                          |                                                                                               |   |                          |              |
| 2         | Based on antigen result                                                                                                     |                                                                                                          |                                                                                                                                                                                                                                                                                                                                                                                                                                                                                                                                                                                                                                                                                                                                                                                                                                                   |   |                                |            |                         |                          |                                     |   |                              |                    |                          |                          |                       |   |                          |                            |   |                          |                       |   |                          |                                                                                               |   |                          |              |
| 3         | Based on serology testing                                                                                                   |                                                                                                          |                                                                                                                                                                                                                                                                                                                                                                                                                                                                                                                                                                                                                                                                                                                                                                                                                                                   |   |                                |            |                         |                          |                                     |   |                              |                    |                          |                          |                       |   |                          |                            |   |                          |                       |   |                          |                                                                                               |   |                          |              |
| 4         | Based on diagnosis code only                                                                                                |                                                                                                          |                                                                                                                                                                                                                                                                                                                                                                                                                                                                                                                                                                                                                                                                                                                                                                                                                                                   |   |                                |            |                         |                          |                                     |   |                              |                    |                          |                          |                       |   |                          |                            |   |                          |                       |   |                          |                                                                                               |   |                          |              |
| 5         | Self-reported by patient                                                                                                    |                                                                                                          |                                                                                                                                                                                                                                                                                                                                                                                                                                                                                                                                                                                                                                                                                                                                                                                                                                                   |   |                                |            |                         |                          |                                     |   |                              |                    |                          |                          |                       |   |                          |                            |   |                          |                       |   |                          |                                                                                               |   |                          |              |
| 6         | Unsure/Not available                                                                                                        |                                                                                                          |                                                                                                                                                                                                                                                                                                                                                                                                                                                                                                                                                                                                                                                                                                                                                                                                                                                   |   |                                |            |                         |                          |                                     |   |                              |                    |                          |                          |                       |   |                          |                            |   |                          |                       |   |                          |                                                                                               |   |                          |              |
| <p>13</p> | <p><b>coviddiagnosis_date_2</b></p> <p>Show the field ONLY if:<br/>[covid] = '1' and [coviddiagnosis_multiple] = '1'</p>    | <p>Enter the date the second COVID-19 diagnosis was made:</p>                                            | <p>text (date_mdy), Required<br/>Field Annotation: @HIDEBUTTON</p>                                                                                                                                                                                                                                                                                                                                                                                                                                                                                                                                                                                                                                                                                                                                                                                |   |                                |            |                         |                          |                                     |   |                              |                    |                          |                          |                       |   |                          |                            |   |                          |                       |   |                          |                                                                                               |   |                          |              |
| <p>14</p> | <p><b>pcr_test_type_2</b></p> <p>Show the field ONLY if:</p>                                                                | <p>Enter the type of PCR test:</p>                                                                       | <p>dropdown, Required</p> <table border="1"> <tr> <td>1</td> <td>Single PCR test for SARS-CoV-2</td> </tr> </table>                                                                                                                                                                                                                                                                                                                                                                                                                                                                                                                                                                                                                                                                                                                               | 1 | Single PCR test for SARS-CoV-2 |            |                         |                          |                                     |   |                              |                    |                          |                          |                       |   |                          |                            |   |                          |                       |   |                          |                                                                                               |   |                          |              |
| 1         | Single PCR test for SARS-CoV-2                                                                                              |                                                                                                          |                                                                                                                                                                                                                                                                                                                                                                                                                                                                                                                                                                                                                                                                                                                                                                                                                                                   |   |                                |            |                         |                          |                                     |   |                              |                    |                          |                          |                       |   |                          |                            |   |                          |                       |   |                          |                                                                                               |   |                          |              |

|    |                                                                                                                               |                                                                                                                    |                                                                                                                                                                                                                                                                                                                                                                                                                                                                                                                                                                                                                                                                                                                                                                                                                                                                                                                                                                                                                                                                                                                                                                                                                                                                                                                                                                                                                                                                                                                                                                                                                                                             |   |                                                                                       |            |                                                |                            |                                         |   |                              |                       |                          |                            |                      |   |                            |                          |   |                            |                             |   |                            |                                                                                                                    |   |                            |            |
|----|-------------------------------------------------------------------------------------------------------------------------------|--------------------------------------------------------------------------------------------------------------------|-------------------------------------------------------------------------------------------------------------------------------------------------------------------------------------------------------------------------------------------------------------------------------------------------------------------------------------------------------------------------------------------------------------------------------------------------------------------------------------------------------------------------------------------------------------------------------------------------------------------------------------------------------------------------------------------------------------------------------------------------------------------------------------------------------------------------------------------------------------------------------------------------------------------------------------------------------------------------------------------------------------------------------------------------------------------------------------------------------------------------------------------------------------------------------------------------------------------------------------------------------------------------------------------------------------------------------------------------------------------------------------------------------------------------------------------------------------------------------------------------------------------------------------------------------------------------------------------------------------------------------------------------------------|---|---------------------------------------------------------------------------------------|------------|------------------------------------------------|----------------------------|-----------------------------------------|---|------------------------------|-----------------------|--------------------------|----------------------------|----------------------|---|----------------------------|--------------------------|---|----------------------------|-----------------------------|---|----------------------------|--------------------------------------------------------------------------------------------------------------------|---|----------------------------|------------|
|    | <p>[covid] = '1' and [coviddiagnosis_method_2] = '1'</p>                                                                      |                                                                                                                    | <table border="1"> <tr> <td data-bbox="1052 113 1089 218">2</td> <td data-bbox="1089 113 1552 218">Multiplex PCR test which tested other respiratory pathogens in addition to SARS-CoV-2</td> </tr> <tr> <td data-bbox="1052 218 1089 275">3</td> <td data-bbox="1089 218 1552 275">Unknown/Unavailable</td> </tr> </table>                                                                                                                                                                                                                                                                                                                                                                                                                                                                                                                                                                                                                                                                                                                                                                                                                                                                                                                                                                                                                                                                                                                                                                                                                                                                                                                                 | 2 | Multiplex PCR test which tested other respiratory pathogens in addition to SARS-CoV-2 | 3          | Unknown/Unavailable                            |                            |                                         |   |                              |                       |                          |                            |                      |   |                            |                          |   |                            |                             |   |                            |                                                                                                                    |   |                            |            |
| 2  | Multiplex PCR test which tested other respiratory pathogens in addition to SARS-CoV-2                                         |                                                                                                                    |                                                                                                                                                                                                                                                                                                                                                                                                                                                                                                                                                                                                                                                                                                                                                                                                                                                                                                                                                                                                                                                                                                                                                                                                                                                                                                                                                                                                                                                                                                                                                                                                                                                             |   |                                                                                       |            |                                                |                            |                                         |   |                              |                       |                          |                            |                      |   |                            |                          |   |                            |                             |   |                            |                                                                                                                    |   |                            |            |
| 3  | Unknown/Unavailable                                                                                                           |                                                                                                                    |                                                                                                                                                                                                                                                                                                                                                                                                                                                                                                                                                                                                                                                                                                                                                                                                                                                                                                                                                                                                                                                                                                                                                                                                                                                                                                                                                                                                                                                                                                                                                                                                                                                             |   |                                                                                       |            |                                                |                            |                                         |   |                              |                       |                          |                            |                      |   |                            |                          |   |                            |                             |   |                            |                                                                                                                    |   |                            |            |
| 15 | <p><b>other_pathogen_2</b></p> <p>Show the field ONLY if:<br/>[covid] = '1' and [coviddiagnosis_method_2] = '1'</p>           | <p>Did the patient have another respiratory pathogen identified within 7 days of the SARS CoV2 result?</p>         | <p>dropdown, Required</p> <table border="1"> <tr> <td data-bbox="1052 327 1089 380">1</td> <td data-bbox="1089 327 1552 380">Yes, same day</td> </tr> <tr> <td data-bbox="1052 380 1089 457">2</td> <td data-bbox="1089 380 1552 457">Yes, not on same day but within 7 days of test</td> </tr> <tr> <td data-bbox="1052 457 1089 510">3</td> <td data-bbox="1089 457 1552 510">No</td> </tr> </table>                                                                                                                                                                                                                                                                                                                                                                                                                                                                                                                                                                                                                                                                                                                                                                                                                                                                                                                                                                                                                                                                                                                                                                                                                                                      | 1 | Yes, same day                                                                         | 2          | Yes, not on same day but within 7 days of test | 3                          | No                                      |   |                              |                       |                          |                            |                      |   |                            |                          |   |                            |                             |   |                            |                                                                                                                    |   |                            |            |
| 1  | Yes, same day                                                                                                                 |                                                                                                                    |                                                                                                                                                                                                                                                                                                                                                                                                                                                                                                                                                                                                                                                                                                                                                                                                                                                                                                                                                                                                                                                                                                                                                                                                                                                                                                                                                                                                                                                                                                                                                                                                                                                             |   |                                                                                       |            |                                                |                            |                                         |   |                              |                       |                          |                            |                      |   |                            |                          |   |                            |                             |   |                            |                                                                                                                    |   |                            |            |
| 2  | Yes, not on same day but within 7 days of test                                                                                |                                                                                                                    |                                                                                                                                                                                                                                                                                                                                                                                                                                                                                                                                                                                                                                                                                                                                                                                                                                                                                                                                                                                                                                                                                                                                                                                                                                                                                                                                                                                                                                                                                                                                                                                                                                                             |   |                                                                                       |            |                                                |                            |                                         |   |                              |                       |                          |                            |                      |   |                            |                          |   |                            |                             |   |                            |                                                                                                                    |   |                            |            |
| 3  | No                                                                                                                            |                                                                                                                    |                                                                                                                                                                                                                                                                                                                                                                                                                                                                                                                                                                                                                                                                                                                                                                                                                                                                                                                                                                                                                                                                                                                                                                                                                                                                                                                                                                                                                                                                                                                                                                                                                                                             |   |                                                                                       |            |                                                |                            |                                         |   |                              |                       |                          |                            |                      |   |                            |                          |   |                            |                             |   |                            |                                                                                                                    |   |                            |            |
| 16 | <p><b>respiratory_pathogens_2</b></p> <p>Show the field ONLY if:<br/>[other_pathogen_2] = '1' or [other_pathogen_2] = '2'</p> | <p>If yes, include name(s) of other respiratory pathogen (select all that apply from the following):</p>           | <p>checkbox, Required</p> <table border="1"> <tr> <td data-bbox="1052 558 1089 611">1</td> <td data-bbox="1089 558 1425 611">respiratory_pathogens_2__1</td> <td data-bbox="1425 558 1560 611">Adenovirus</td> </tr> <tr> <td data-bbox="1052 611 1089 726">2</td> <td data-bbox="1089 611 1425 726">respiratory_pathogens_2__2</td> <td data-bbox="1425 611 1560 726">Seasonal Coronavirus (229E, HKU1, OC43)</td> </tr> <tr> <td data-bbox="1052 726 1089 804">3</td> <td data-bbox="1089 726 1425 804">respiratory_pathogens_2__3</td> <td data-bbox="1425 726 1560 804">Human Metapneumovirus</td> </tr> <tr> <td data-bbox="1052 804 1089 882">4</td> <td data-bbox="1089 804 1425 882">respiratory_pathogens_2__4</td> <td data-bbox="1425 804 1560 882">Human Rhinovirus/E</td> </tr> <tr> <td data-bbox="1052 882 1089 959">5</td> <td data-bbox="1089 882 1425 959">respiratory_pathogens_2__5</td> <td data-bbox="1425 882 1560 959">Parainfluenza 1,2,3 or 4</td> </tr> <tr> <td data-bbox="1052 959 1089 1037">6</td> <td data-bbox="1089 959 1425 1037">respiratory_pathogens_2__6</td> <td data-bbox="1425 959 1560 1037">Respiratory syncytial virus</td> </tr> <tr> <td data-bbox="1052 1037 1089 1293">7</td> <td data-bbox="1089 1037 1425 1293">respiratory_pathogens_2__7</td> <td data-bbox="1425 1037 1560 1293">Bacteria (Bordetella pertussis, parainfluenzae, Bordetella pertussis, Chlamydia pneumoniae, Mycoplasma pneumoniae)</td> </tr> <tr> <td data-bbox="1052 1293 1089 1346">8</td> <td data-bbox="1089 1293 1425 1346">respiratory_pathogens_2__8</td> <td data-bbox="1425 1293 1560 1346">Unknown/Un</td> </tr> </table> | 1 | respiratory_pathogens_2__1                                                            | Adenovirus | 2                                              | respiratory_pathogens_2__2 | Seasonal Coronavirus (229E, HKU1, OC43) | 3 | respiratory_pathogens_2__3   | Human Metapneumovirus | 4                        | respiratory_pathogens_2__4 | Human Rhinovirus/E   | 5 | respiratory_pathogens_2__5 | Parainfluenza 1,2,3 or 4 | 6 | respiratory_pathogens_2__6 | Respiratory syncytial virus | 7 | respiratory_pathogens_2__7 | Bacteria (Bordetella pertussis, parainfluenzae, Bordetella pertussis, Chlamydia pneumoniae, Mycoplasma pneumoniae) | 8 | respiratory_pathogens_2__8 | Unknown/Un |
| 1  | respiratory_pathogens_2__1                                                                                                    | Adenovirus                                                                                                         |                                                                                                                                                                                                                                                                                                                                                                                                                                                                                                                                                                                                                                                                                                                                                                                                                                                                                                                                                                                                                                                                                                                                                                                                                                                                                                                                                                                                                                                                                                                                                                                                                                                             |   |                                                                                       |            |                                                |                            |                                         |   |                              |                       |                          |                            |                      |   |                            |                          |   |                            |                             |   |                            |                                                                                                                    |   |                            |            |
| 2  | respiratory_pathogens_2__2                                                                                                    | Seasonal Coronavirus (229E, HKU1, OC43)                                                                            |                                                                                                                                                                                                                                                                                                                                                                                                                                                                                                                                                                                                                                                                                                                                                                                                                                                                                                                                                                                                                                                                                                                                                                                                                                                                                                                                                                                                                                                                                                                                                                                                                                                             |   |                                                                                       |            |                                                |                            |                                         |   |                              |                       |                          |                            |                      |   |                            |                          |   |                            |                             |   |                            |                                                                                                                    |   |                            |            |
| 3  | respiratory_pathogens_2__3                                                                                                    | Human Metapneumovirus                                                                                              |                                                                                                                                                                                                                                                                                                                                                                                                                                                                                                                                                                                                                                                                                                                                                                                                                                                                                                                                                                                                                                                                                                                                                                                                                                                                                                                                                                                                                                                                                                                                                                                                                                                             |   |                                                                                       |            |                                                |                            |                                         |   |                              |                       |                          |                            |                      |   |                            |                          |   |                            |                             |   |                            |                                                                                                                    |   |                            |            |
| 4  | respiratory_pathogens_2__4                                                                                                    | Human Rhinovirus/E                                                                                                 |                                                                                                                                                                                                                                                                                                                                                                                                                                                                                                                                                                                                                                                                                                                                                                                                                                                                                                                                                                                                                                                                                                                                                                                                                                                                                                                                                                                                                                                                                                                                                                                                                                                             |   |                                                                                       |            |                                                |                            |                                         |   |                              |                       |                          |                            |                      |   |                            |                          |   |                            |                             |   |                            |                                                                                                                    |   |                            |            |
| 5  | respiratory_pathogens_2__5                                                                                                    | Parainfluenza 1,2,3 or 4                                                                                           |                                                                                                                                                                                                                                                                                                                                                                                                                                                                                                                                                                                                                                                                                                                                                                                                                                                                                                                                                                                                                                                                                                                                                                                                                                                                                                                                                                                                                                                                                                                                                                                                                                                             |   |                                                                                       |            |                                                |                            |                                         |   |                              |                       |                          |                            |                      |   |                            |                          |   |                            |                             |   |                            |                                                                                                                    |   |                            |            |
| 6  | respiratory_pathogens_2__6                                                                                                    | Respiratory syncytial virus                                                                                        |                                                                                                                                                                                                                                                                                                                                                                                                                                                                                                                                                                                                                                                                                                                                                                                                                                                                                                                                                                                                                                                                                                                                                                                                                                                                                                                                                                                                                                                                                                                                                                                                                                                             |   |                                                                                       |            |                                                |                            |                                         |   |                              |                       |                          |                            |                      |   |                            |                          |   |                            |                             |   |                            |                                                                                                                    |   |                            |            |
| 7  | respiratory_pathogens_2__7                                                                                                    | Bacteria (Bordetella pertussis, parainfluenzae, Bordetella pertussis, Chlamydia pneumoniae, Mycoplasma pneumoniae) |                                                                                                                                                                                                                                                                                                                                                                                                                                                                                                                                                                                                                                                                                                                                                                                                                                                                                                                                                                                                                                                                                                                                                                                                                                                                                                                                                                                                                                                                                                                                                                                                                                                             |   |                                                                                       |            |                                                |                            |                                         |   |                              |                       |                          |                            |                      |   |                            |                          |   |                            |                             |   |                            |                                                                                                                    |   |                            |            |
| 8  | respiratory_pathogens_2__8                                                                                                    | Unknown/Un                                                                                                         |                                                                                                                                                                                                                                                                                                                                                                                                                                                                                                                                                                                                                                                                                                                                                                                                                                                                                                                                                                                                                                                                                                                                                                                                                                                                                                                                                                                                                                                                                                                                                                                                                                                             |   |                                                                                       |            |                                                |                            |                                         |   |                              |                       |                          |                            |                      |   |                            |                          |   |                            |                             |   |                            |                                                                                                                    |   |                            |            |
| 17 | <p><b>coviddiagnosis_method_3</b></p> <p>Show the field ONLY if:<br/>[covid] = '1' and [coviddiagnosis_multiple] = '1'</p>    | <p>How was the third diagnosis made?</p>                                                                           | <p>dropdown</p> <table border="1"> <tr> <td data-bbox="1052 1392 1089 1444">1</td> <td data-bbox="1089 1392 1433 1444">Based on PCR result</td> </tr> <tr> <td data-bbox="1052 1444 1089 1497">2</td> <td data-bbox="1089 1444 1433 1497">Based on antigen result</td> </tr> <tr> <td data-bbox="1052 1497 1089 1549">3</td> <td data-bbox="1089 1497 1433 1549">Based on serology testing</td> </tr> <tr> <td data-bbox="1052 1549 1089 1602">4</td> <td data-bbox="1089 1549 1433 1602">Based on diagnosis code only</td> </tr> <tr> <td data-bbox="1052 1602 1089 1654">5</td> <td data-bbox="1089 1602 1433 1654">Self-reported by patient</td> </tr> <tr> <td data-bbox="1052 1654 1089 1686">6</td> <td data-bbox="1089 1654 1433 1686">Unsure/Not available</td> </tr> </table>                                                                                                                                                                                                                                                                                                                                                                                                                                                                                                                                                                                                                                                                                                                                                                                                                                                                      | 1 | Based on PCR result                                                                   | 2          | Based on antigen result                        | 3                          | Based on serology testing               | 4 | Based on diagnosis code only | 5                     | Self-reported by patient | 6                          | Unsure/Not available |   |                            |                          |   |                            |                             |   |                            |                                                                                                                    |   |                            |            |
| 1  | Based on PCR result                                                                                                           |                                                                                                                    |                                                                                                                                                                                                                                                                                                                                                                                                                                                                                                                                                                                                                                                                                                                                                                                                                                                                                                                                                                                                                                                                                                                                                                                                                                                                                                                                                                                                                                                                                                                                                                                                                                                             |   |                                                                                       |            |                                                |                            |                                         |   |                              |                       |                          |                            |                      |   |                            |                          |   |                            |                             |   |                            |                                                                                                                    |   |                            |            |
| 2  | Based on antigen result                                                                                                       |                                                                                                                    |                                                                                                                                                                                                                                                                                                                                                                                                                                                                                                                                                                                                                                                                                                                                                                                                                                                                                                                                                                                                                                                                                                                                                                                                                                                                                                                                                                                                                                                                                                                                                                                                                                                             |   |                                                                                       |            |                                                |                            |                                         |   |                              |                       |                          |                            |                      |   |                            |                          |   |                            |                             |   |                            |                                                                                                                    |   |                            |            |
| 3  | Based on serology testing                                                                                                     |                                                                                                                    |                                                                                                                                                                                                                                                                                                                                                                                                                                                                                                                                                                                                                                                                                                                                                                                                                                                                                                                                                                                                                                                                                                                                                                                                                                                                                                                                                                                                                                                                                                                                                                                                                                                             |   |                                                                                       |            |                                                |                            |                                         |   |                              |                       |                          |                            |                      |   |                            |                          |   |                            |                             |   |                            |                                                                                                                    |   |                            |            |
| 4  | Based on diagnosis code only                                                                                                  |                                                                                                                    |                                                                                                                                                                                                                                                                                                                                                                                                                                                                                                                                                                                                                                                                                                                                                                                                                                                                                                                                                                                                                                                                                                                                                                                                                                                                                                                                                                                                                                                                                                                                                                                                                                                             |   |                                                                                       |            |                                                |                            |                                         |   |                              |                       |                          |                            |                      |   |                            |                          |   |                            |                             |   |                            |                                                                                                                    |   |                            |            |
| 5  | Self-reported by patient                                                                                                      |                                                                                                                    |                                                                                                                                                                                                                                                                                                                                                                                                                                                                                                                                                                                                                                                                                                                                                                                                                                                                                                                                                                                                                                                                                                                                                                                                                                                                                                                                                                                                                                                                                                                                                                                                                                                             |   |                                                                                       |            |                                                |                            |                                         |   |                              |                       |                          |                            |                      |   |                            |                          |   |                            |                             |   |                            |                                                                                                                    |   |                            |            |
| 6  | Unsure/Not available                                                                                                          |                                                                                                                    |                                                                                                                                                                                                                                                                                                                                                                                                                                                                                                                                                                                                                                                                                                                                                                                                                                                                                                                                                                                                                                                                                                                                                                                                                                                                                                                                                                                                                                                                                                                                                                                                                                                             |   |                                                                                       |            |                                                |                            |                                         |   |                              |                       |                          |                            |                      |   |                            |                          |   |                            |                             |   |                            |                                                                                                                    |   |                            |            |
| 18 | <p><b>coviddiagnosis_date_3</b></p> <p>Show the field ONLY if:<br/>[covid] = '1' and [coviddiagnosis_multiple] = '1'</p>      | <p>Enter the date the third COVID-19 diagnosis was made:</p>                                                       | <p>text (date_mdy)<br/>Field Annotation: @HIDEBUTTON</p>                                                                                                                                                                                                                                                                                                                                                                                                                                                                                                                                                                                                                                                                                                                                                                                                                                                                                                                                                                                                                                                                                                                                                                                                                                                                                                                                                                                                                                                                                                                                                                                                    |   |                                                                                       |            |                                                |                            |                                         |   |                              |                       |                          |                            |                      |   |                            |                          |   |                            |                             |   |                            |                                                                                                                    |   |                            |            |

|    |                                                                                                                                                                   |                                                                                                        |                                                                                                                                                                                                                                                                                                                                                                                                                                                                                                                                                                                                                                                                                                                                                                                                                                                                     |   |                                |            |                                                                                       |                            |                                 |   |                              |                  |                          |                            |                    |   |                            |                          |   |                            |                             |   |                            |                                                                                                        |   |                            |            |
|----|-------------------------------------------------------------------------------------------------------------------------------------------------------------------|--------------------------------------------------------------------------------------------------------|---------------------------------------------------------------------------------------------------------------------------------------------------------------------------------------------------------------------------------------------------------------------------------------------------------------------------------------------------------------------------------------------------------------------------------------------------------------------------------------------------------------------------------------------------------------------------------------------------------------------------------------------------------------------------------------------------------------------------------------------------------------------------------------------------------------------------------------------------------------------|---|--------------------------------|------------|---------------------------------------------------------------------------------------|----------------------------|---------------------------------|---|------------------------------|------------------|--------------------------|----------------------------|--------------------|---|----------------------------|--------------------------|---|----------------------------|-----------------------------|---|----------------------------|--------------------------------------------------------------------------------------------------------|---|----------------------------|------------|
| 19 | <p><b>pcr_test_type_3</b></p> <p>Show the field ONLY if:<br/>[covid] = '1' and [coviddiagnosis_method_3] = '1'</p>                                                | Enter the type of PCR test:                                                                            | <p>dropdown, Required</p> <table border="1"> <tr> <td>1</td> <td>Single PCR test for SARS-CoV-2</td> </tr> <tr> <td>2</td> <td>Multiplex PCR test which tested other respiratory pathogens in addition to SARS-CoV-2</td> </tr> <tr> <td>3</td> <td>Unknown/Unavailable</td> </tr> </table>                                                                                                                                                                                                                                                                                                                                                                                                                                                                                                                                                                         | 1 | Single PCR test for SARS-CoV-2 | 2          | Multiplex PCR test which tested other respiratory pathogens in addition to SARS-CoV-2 | 3                          | Unknown/Unavailable             |   |                              |                  |                          |                            |                    |   |                            |                          |   |                            |                             |   |                            |                                                                                                        |   |                            |            |
| 1  | Single PCR test for SARS-CoV-2                                                                                                                                    |                                                                                                        |                                                                                                                                                                                                                                                                                                                                                                                                                                                                                                                                                                                                                                                                                                                                                                                                                                                                     |   |                                |            |                                                                                       |                            |                                 |   |                              |                  |                          |                            |                    |   |                            |                          |   |                            |                             |   |                            |                                                                                                        |   |                            |            |
| 2  | Multiplex PCR test which tested other respiratory pathogens in addition to SARS-CoV-2                                                                             |                                                                                                        |                                                                                                                                                                                                                                                                                                                                                                                                                                                                                                                                                                                                                                                                                                                                                                                                                                                                     |   |                                |            |                                                                                       |                            |                                 |   |                              |                  |                          |                            |                    |   |                            |                          |   |                            |                             |   |                            |                                                                                                        |   |                            |            |
| 3  | Unknown/Unavailable                                                                                                                                               |                                                                                                        |                                                                                                                                                                                                                                                                                                                                                                                                                                                                                                                                                                                                                                                                                                                                                                                                                                                                     |   |                                |            |                                                                                       |                            |                                 |   |                              |                  |                          |                            |                    |   |                            |                          |   |                            |                             |   |                            |                                                                                                        |   |                            |            |
| 20 | <p><b>other_pathogen_3</b></p> <p>Show the field ONLY if:<br/>[covid] = '1' and [coviddiagnosis_method_3] = '1'</p>                                               | Did the patient have another respiratory pathogen identified within 7 days of the SARS CoV2 result?    | <p>dropdown, Required</p> <table border="1"> <tr> <td>1</td> <td>Yes, same day</td> </tr> <tr> <td>2</td> <td>Yes, not on same day but within 7 days of test</td> </tr> <tr> <td>3</td> <td>No</td> </tr> </table>                                                                                                                                                                                                                                                                                                                                                                                                                                                                                                                                                                                                                                                  | 1 | Yes, same day                  | 2          | Yes, not on same day but within 7 days of test                                        | 3                          | No                              |   |                              |                  |                          |                            |                    |   |                            |                          |   |                            |                             |   |                            |                                                                                                        |   |                            |            |
| 1  | Yes, same day                                                                                                                                                     |                                                                                                        |                                                                                                                                                                                                                                                                                                                                                                                                                                                                                                                                                                                                                                                                                                                                                                                                                                                                     |   |                                |            |                                                                                       |                            |                                 |   |                              |                  |                          |                            |                    |   |                            |                          |   |                            |                             |   |                            |                                                                                                        |   |                            |            |
| 2  | Yes, not on same day but within 7 days of test                                                                                                                    |                                                                                                        |                                                                                                                                                                                                                                                                                                                                                                                                                                                                                                                                                                                                                                                                                                                                                                                                                                                                     |   |                                |            |                                                                                       |                            |                                 |   |                              |                  |                          |                            |                    |   |                            |                          |   |                            |                             |   |                            |                                                                                                        |   |                            |            |
| 3  | No                                                                                                                                                                |                                                                                                        |                                                                                                                                                                                                                                                                                                                                                                                                                                                                                                                                                                                                                                                                                                                                                                                                                                                                     |   |                                |            |                                                                                       |                            |                                 |   |                              |                  |                          |                            |                    |   |                            |                          |   |                            |                             |   |                            |                                                                                                        |   |                            |            |
| 21 | <p><b>respiratory_pathogens_3</b></p> <p>Show the field ONLY if:<br/>[other_pathogen_3] = '1' or [other_pathogen_3] = '2'</p>                                     | If yes, include name(s) of other respiratory pathogen (select all that apply from the following):      | <p>checkbox, Required</p> <table border="1"> <tr> <td>1</td> <td>respiratory_pathogens_3__1</td> <td>Adenovirus</td> </tr> <tr> <td>2</td> <td>respiratory_pathogens_3__2</td> <td>Seasonal Cor (229E, HKU1, OC43)</td> </tr> <tr> <td>3</td> <td>respiratory_pathogens_3__3</td> <td>Human Metapneumo</td> </tr> <tr> <td>4</td> <td>respiratory_pathogens_3__4</td> <td>Human Rhinovirus/E</td> </tr> <tr> <td>5</td> <td>respiratory_pathogens_3__5</td> <td>Parainfluenza 1,2,3 or 4</td> </tr> <tr> <td>6</td> <td>respiratory_pathogens_3__6</td> <td>Respiratory syncytial virus</td> </tr> <tr> <td>7</td> <td>respiratory_pathogens_3__7</td> <td>Bacteria (Bordetella pertussis, Bordetella parapertussis, Chlamydia pneumoniae, Mycoplasma pneumoniae)</td> </tr> <tr> <td>8</td> <td>respiratory_pathogens_3__8</td> <td>Unknown/Un</td> </tr> </table> | 1 | respiratory_pathogens_3__1     | Adenovirus | 2                                                                                     | respiratory_pathogens_3__2 | Seasonal Cor (229E, HKU1, OC43) | 3 | respiratory_pathogens_3__3   | Human Metapneumo | 4                        | respiratory_pathogens_3__4 | Human Rhinovirus/E | 5 | respiratory_pathogens_3__5 | Parainfluenza 1,2,3 or 4 | 6 | respiratory_pathogens_3__6 | Respiratory syncytial virus | 7 | respiratory_pathogens_3__7 | Bacteria (Bordetella pertussis, Bordetella parapertussis, Chlamydia pneumoniae, Mycoplasma pneumoniae) | 8 | respiratory_pathogens_3__8 | Unknown/Un |
| 1  | respiratory_pathogens_3__1                                                                                                                                        | Adenovirus                                                                                             |                                                                                                                                                                                                                                                                                                                                                                                                                                                                                                                                                                                                                                                                                                                                                                                                                                                                     |   |                                |            |                                                                                       |                            |                                 |   |                              |                  |                          |                            |                    |   |                            |                          |   |                            |                             |   |                            |                                                                                                        |   |                            |            |
| 2  | respiratory_pathogens_3__2                                                                                                                                        | Seasonal Cor (229E, HKU1, OC43)                                                                        |                                                                                                                                                                                                                                                                                                                                                                                                                                                                                                                                                                                                                                                                                                                                                                                                                                                                     |   |                                |            |                                                                                       |                            |                                 |   |                              |                  |                          |                            |                    |   |                            |                          |   |                            |                             |   |                            |                                                                                                        |   |                            |            |
| 3  | respiratory_pathogens_3__3                                                                                                                                        | Human Metapneumo                                                                                       |                                                                                                                                                                                                                                                                                                                                                                                                                                                                                                                                                                                                                                                                                                                                                                                                                                                                     |   |                                |            |                                                                                       |                            |                                 |   |                              |                  |                          |                            |                    |   |                            |                          |   |                            |                             |   |                            |                                                                                                        |   |                            |            |
| 4  | respiratory_pathogens_3__4                                                                                                                                        | Human Rhinovirus/E                                                                                     |                                                                                                                                                                                                                                                                                                                                                                                                                                                                                                                                                                                                                                                                                                                                                                                                                                                                     |   |                                |            |                                                                                       |                            |                                 |   |                              |                  |                          |                            |                    |   |                            |                          |   |                            |                             |   |                            |                                                                                                        |   |                            |            |
| 5  | respiratory_pathogens_3__5                                                                                                                                        | Parainfluenza 1,2,3 or 4                                                                               |                                                                                                                                                                                                                                                                                                                                                                                                                                                                                                                                                                                                                                                                                                                                                                                                                                                                     |   |                                |            |                                                                                       |                            |                                 |   |                              |                  |                          |                            |                    |   |                            |                          |   |                            |                             |   |                            |                                                                                                        |   |                            |            |
| 6  | respiratory_pathogens_3__6                                                                                                                                        | Respiratory syncytial virus                                                                            |                                                                                                                                                                                                                                                                                                                                                                                                                                                                                                                                                                                                                                                                                                                                                                                                                                                                     |   |                                |            |                                                                                       |                            |                                 |   |                              |                  |                          |                            |                    |   |                            |                          |   |                            |                             |   |                            |                                                                                                        |   |                            |            |
| 7  | respiratory_pathogens_3__7                                                                                                                                        | Bacteria (Bordetella pertussis, Bordetella parapertussis, Chlamydia pneumoniae, Mycoplasma pneumoniae) |                                                                                                                                                                                                                                                                                                                                                                                                                                                                                                                                                                                                                                                                                                                                                                                                                                                                     |   |                                |            |                                                                                       |                            |                                 |   |                              |                  |                          |                            |                    |   |                            |                          |   |                            |                             |   |                            |                                                                                                        |   |                            |            |
| 8  | respiratory_pathogens_3__8                                                                                                                                        | Unknown/Un                                                                                             |                                                                                                                                                                                                                                                                                                                                                                                                                                                                                                                                                                                                                                                                                                                                                                                                                                                                     |   |                                |            |                                                                                       |                            |                                 |   |                              |                  |                          |                            |                    |   |                            |                          |   |                            |                             |   |                            |                                                                                                        |   |                            |            |
| 22 | <p><b>covid_multiplereinfections</b></p> <p>Show the field ONLY if:<br/>[covid] = '1' and [coviddiagnosis_multiple] = '1'</p>                                     | Did the patient have more than three repeated COVID-19 infections?                                     | <p>yesno, Required</p> <table border="1"> <tr> <td>1</td> <td>Yes</td> </tr> <tr> <td>0</td> <td>No</td> </tr> </table>                                                                                                                                                                                                                                                                                                                                                                                                                                                                                                                                                                                                                                                                                                                                             | 1 | Yes                            | 0          | No                                                                                    |                            |                                 |   |                              |                  |                          |                            |                    |   |                            |                          |   |                            |                             |   |                            |                                                                                                        |   |                            |            |
| 1  | Yes                                                                                                                                                               |                                                                                                        |                                                                                                                                                                                                                                                                                                                                                                                                                                                                                                                                                                                                                                                                                                                                                                                                                                                                     |   |                                |            |                                                                                       |                            |                                 |   |                              |                  |                          |                            |                    |   |                            |                          |   |                            |                             |   |                            |                                                                                                        |   |                            |            |
| 0  | No                                                                                                                                                                |                                                                                                        |                                                                                                                                                                                                                                                                                                                                                                                                                                                                                                                                                                                                                                                                                                                                                                                                                                                                     |   |                                |            |                                                                                       |                            |                                 |   |                              |                  |                          |                            |                    |   |                            |                          |   |                            |                             |   |                            |                                                                                                        |   |                            |            |
| 23 | <p><b>coviddiagnosis_method_4</b></p> <p>Show the field ONLY if:<br/>[covid] = '1' and [coviddiagnosis_multiple] = '1' and [covid_multiplereinfections] = '1'</p> | How was the fourth diagnosis made?                                                                     | <p>dropdown, Required</p> <table border="1"> <tr> <td>1</td> <td>Based on PCR result</td> </tr> <tr> <td>2</td> <td>Based on antigen result</td> </tr> <tr> <td>3</td> <td>Based on serology testing</td> </tr> <tr> <td>4</td> <td>Based on diagnosis code only</td> </tr> <tr> <td>5</td> <td>Self-reported by patient</td> </tr> </table>                                                                                                                                                                                                                                                                                                                                                                                                                                                                                                                        | 1 | Based on PCR result            | 2          | Based on antigen result                                                               | 3                          | Based on serology testing       | 4 | Based on diagnosis code only | 5                | Self-reported by patient |                            |                    |   |                            |                          |   |                            |                             |   |                            |                                                                                                        |   |                            |            |
| 1  | Based on PCR result                                                                                                                                               |                                                                                                        |                                                                                                                                                                                                                                                                                                                                                                                                                                                                                                                                                                                                                                                                                                                                                                                                                                                                     |   |                                |            |                                                                                       |                            |                                 |   |                              |                  |                          |                            |                    |   |                            |                          |   |                            |                             |   |                            |                                                                                                        |   |                            |            |
| 2  | Based on antigen result                                                                                                                                           |                                                                                                        |                                                                                                                                                                                                                                                                                                                                                                                                                                                                                                                                                                                                                                                                                                                                                                                                                                                                     |   |                                |            |                                                                                       |                            |                                 |   |                              |                  |                          |                            |                    |   |                            |                          |   |                            |                             |   |                            |                                                                                                        |   |                            |            |
| 3  | Based on serology testing                                                                                                                                         |                                                                                                        |                                                                                                                                                                                                                                                                                                                                                                                                                                                                                                                                                                                                                                                                                                                                                                                                                                                                     |   |                                |            |                                                                                       |                            |                                 |   |                              |                  |                          |                            |                    |   |                            |                          |   |                            |                             |   |                            |                                                                                                        |   |                            |            |
| 4  | Based on diagnosis code only                                                                                                                                      |                                                                                                        |                                                                                                                                                                                                                                                                                                                                                                                                                                                                                                                                                                                                                                                                                                                                                                                                                                                                     |   |                                |            |                                                                                       |                            |                                 |   |                              |                  |                          |                            |                    |   |                            |                          |   |                            |                             |   |                            |                                                                                                        |   |                            |            |
| 5  | Self-reported by patient                                                                                                                                          |                                                                                                        |                                                                                                                                                                                                                                                                                                                                                                                                                                                                                                                                                                                                                                                                                                                                                                                                                                                                     |   |                                |            |                                                                                       |                            |                                 |   |                              |                  |                          |                            |                    |   |                            |                          |   |                            |                             |   |                            |                                                                                                        |   |                            |            |

|    |                                                                                                                                                                 |                                                                                                        |                                                                                                                                                                                                                                                                                                                                                                                                                                                                                                                                                                                                                                                                                                                                                                                                                                                              |   |                                |            |                                                                                       |                            |                                 |   |                            |                  |   |                            |                    |   |                            |                          |   |                            |                             |   |                            |                                                                                                        |   |                            |            |
|----|-----------------------------------------------------------------------------------------------------------------------------------------------------------------|--------------------------------------------------------------------------------------------------------|--------------------------------------------------------------------------------------------------------------------------------------------------------------------------------------------------------------------------------------------------------------------------------------------------------------------------------------------------------------------------------------------------------------------------------------------------------------------------------------------------------------------------------------------------------------------------------------------------------------------------------------------------------------------------------------------------------------------------------------------------------------------------------------------------------------------------------------------------------------|---|--------------------------------|------------|---------------------------------------------------------------------------------------|----------------------------|---------------------------------|---|----------------------------|------------------|---|----------------------------|--------------------|---|----------------------------|--------------------------|---|----------------------------|-----------------------------|---|----------------------------|--------------------------------------------------------------------------------------------------------|---|----------------------------|------------|
|    |                                                                                                                                                                 |                                                                                                        | 6   Unsure/Not available                                                                                                                                                                                                                                                                                                                                                                                                                                                                                                                                                                                                                                                                                                                                                                                                                                     |   |                                |            |                                                                                       |                            |                                 |   |                            |                  |   |                            |                    |   |                            |                          |   |                            |                             |   |                            |                                                                                                        |   |                            |            |
| 24 | <p><b>coviddiagnosis_date_4</b></p> <p>Show the field ONLY if:<br/>[covid] = '1' and [coviddiagnosis_multiple] = '1' and [covid_multiplereinfections] = '1'</p> | Enter the date the fourth COVID-19 diagnosis was made:                                                 | text (date_mdy), Required<br>Field Annotation: @HIDEBUTTON                                                                                                                                                                                                                                                                                                                                                                                                                                                                                                                                                                                                                                                                                                                                                                                                   |   |                                |            |                                                                                       |                            |                                 |   |                            |                  |   |                            |                    |   |                            |                          |   |                            |                             |   |                            |                                                                                                        |   |                            |            |
| 25 | <p><b>pcr_test_type_4</b></p> <p>Show the field ONLY if:<br/>[covid] = '1' and [coviddiagnosis_method_4] = '1'</p>                                              | Enter the type of PCR test:                                                                            | dropdown, Required <table border="1"> <tr> <td>1</td> <td>Single PCR test for SARS-CoV-2</td> </tr> <tr> <td>2</td> <td>Multiplex PCR test which tested other respiratory pathogens in addition to SARS-CoV-2</td> </tr> <tr> <td>3</td> <td>Unknown/Unavailable</td> </tr> </table>                                                                                                                                                                                                                                                                                                                                                                                                                                                                                                                                                                         | 1 | Single PCR test for SARS-CoV-2 | 2          | Multiplex PCR test which tested other respiratory pathogens in addition to SARS-CoV-2 | 3                          | Unknown/Unavailable             |   |                            |                  |   |                            |                    |   |                            |                          |   |                            |                             |   |                            |                                                                                                        |   |                            |            |
| 1  | Single PCR test for SARS-CoV-2                                                                                                                                  |                                                                                                        |                                                                                                                                                                                                                                                                                                                                                                                                                                                                                                                                                                                                                                                                                                                                                                                                                                                              |   |                                |            |                                                                                       |                            |                                 |   |                            |                  |   |                            |                    |   |                            |                          |   |                            |                             |   |                            |                                                                                                        |   |                            |            |
| 2  | Multiplex PCR test which tested other respiratory pathogens in addition to SARS-CoV-2                                                                           |                                                                                                        |                                                                                                                                                                                                                                                                                                                                                                                                                                                                                                                                                                                                                                                                                                                                                                                                                                                              |   |                                |            |                                                                                       |                            |                                 |   |                            |                  |   |                            |                    |   |                            |                          |   |                            |                             |   |                            |                                                                                                        |   |                            |            |
| 3  | Unknown/Unavailable                                                                                                                                             |                                                                                                        |                                                                                                                                                                                                                                                                                                                                                                                                                                                                                                                                                                                                                                                                                                                                                                                                                                                              |   |                                |            |                                                                                       |                            |                                 |   |                            |                  |   |                            |                    |   |                            |                          |   |                            |                             |   |                            |                                                                                                        |   |                            |            |
| 26 | <p><b>other_pathogen_4</b></p> <p>Show the field ONLY if:<br/>[covid] = '1' and [coviddiagnosis_method_4] = '1'</p>                                             | Did the patient have another respiratory pathogen identified within 7 days of the SARS CoV2 result?    | dropdown, Required <table border="1"> <tr> <td>1</td> <td>Yes, same day</td> </tr> <tr> <td>2</td> <td>Yes, not on same day but within 7 days of test</td> </tr> <tr> <td>3</td> <td>No</td> </tr> </table>                                                                                                                                                                                                                                                                                                                                                                                                                                                                                                                                                                                                                                                  | 1 | Yes, same day                  | 2          | Yes, not on same day but within 7 days of test                                        | 3                          | No                              |   |                            |                  |   |                            |                    |   |                            |                          |   |                            |                             |   |                            |                                                                                                        |   |                            |            |
| 1  | Yes, same day                                                                                                                                                   |                                                                                                        |                                                                                                                                                                                                                                                                                                                                                                                                                                                                                                                                                                                                                                                                                                                                                                                                                                                              |   |                                |            |                                                                                       |                            |                                 |   |                            |                  |   |                            |                    |   |                            |                          |   |                            |                             |   |                            |                                                                                                        |   |                            |            |
| 2  | Yes, not on same day but within 7 days of test                                                                                                                  |                                                                                                        |                                                                                                                                                                                                                                                                                                                                                                                                                                                                                                                                                                                                                                                                                                                                                                                                                                                              |   |                                |            |                                                                                       |                            |                                 |   |                            |                  |   |                            |                    |   |                            |                          |   |                            |                             |   |                            |                                                                                                        |   |                            |            |
| 3  | No                                                                                                                                                              |                                                                                                        |                                                                                                                                                                                                                                                                                                                                                                                                                                                                                                                                                                                                                                                                                                                                                                                                                                                              |   |                                |            |                                                                                       |                            |                                 |   |                            |                  |   |                            |                    |   |                            |                          |   |                            |                             |   |                            |                                                                                                        |   |                            |            |
| 27 | <p><b>respiratory_pathogens_4</b></p> <p>Show the field ONLY if:<br/>[other_pathogen_4] = '1' or [other_pathogen_4] = '2'</p>                                   | If yes, include name(s) of other respiratory pathogen (select all that apply from the following):      | checkbox, Required <table border="1"> <tr> <td>1</td> <td>respiratory_pathogens_4__1</td> <td>Adenovirus</td> </tr> <tr> <td>2</td> <td>respiratory_pathogens_4__2</td> <td>Seasonal Cor (229E, HKU1, OC43)</td> </tr> <tr> <td>3</td> <td>respiratory_pathogens_4__3</td> <td>Human Metapneumo</td> </tr> <tr> <td>4</td> <td>respiratory_pathogens_4__4</td> <td>Human Rhinovirus/E</td> </tr> <tr> <td>5</td> <td>respiratory_pathogens_4__5</td> <td>Parainfluenza 1,2,3 or 4</td> </tr> <tr> <td>6</td> <td>respiratory_pathogens_4__6</td> <td>Respiratory syncytial virus</td> </tr> <tr> <td>7</td> <td>respiratory_pathogens_4__7</td> <td>Bacteria (Bordetella pertussis, Bordetella parapertussis, Chlamydia pneumoniae, Mycoplasma pneumoniae)</td> </tr> <tr> <td>8</td> <td>respiratory_pathogens_4__8</td> <td>Unknown/Un</td> </tr> </table> | 1 | respiratory_pathogens_4__1     | Adenovirus | 2                                                                                     | respiratory_pathogens_4__2 | Seasonal Cor (229E, HKU1, OC43) | 3 | respiratory_pathogens_4__3 | Human Metapneumo | 4 | respiratory_pathogens_4__4 | Human Rhinovirus/E | 5 | respiratory_pathogens_4__5 | Parainfluenza 1,2,3 or 4 | 6 | respiratory_pathogens_4__6 | Respiratory syncytial virus | 7 | respiratory_pathogens_4__7 | Bacteria (Bordetella pertussis, Bordetella parapertussis, Chlamydia pneumoniae, Mycoplasma pneumoniae) | 8 | respiratory_pathogens_4__8 | Unknown/Un |
| 1  | respiratory_pathogens_4__1                                                                                                                                      | Adenovirus                                                                                             |                                                                                                                                                                                                                                                                                                                                                                                                                                                                                                                                                                                                                                                                                                                                                                                                                                                              |   |                                |            |                                                                                       |                            |                                 |   |                            |                  |   |                            |                    |   |                            |                          |   |                            |                             |   |                            |                                                                                                        |   |                            |            |
| 2  | respiratory_pathogens_4__2                                                                                                                                      | Seasonal Cor (229E, HKU1, OC43)                                                                        |                                                                                                                                                                                                                                                                                                                                                                                                                                                                                                                                                                                                                                                                                                                                                                                                                                                              |   |                                |            |                                                                                       |                            |                                 |   |                            |                  |   |                            |                    |   |                            |                          |   |                            |                             |   |                            |                                                                                                        |   |                            |            |
| 3  | respiratory_pathogens_4__3                                                                                                                                      | Human Metapneumo                                                                                       |                                                                                                                                                                                                                                                                                                                                                                                                                                                                                                                                                                                                                                                                                                                                                                                                                                                              |   |                                |            |                                                                                       |                            |                                 |   |                            |                  |   |                            |                    |   |                            |                          |   |                            |                             |   |                            |                                                                                                        |   |                            |            |
| 4  | respiratory_pathogens_4__4                                                                                                                                      | Human Rhinovirus/E                                                                                     |                                                                                                                                                                                                                                                                                                                                                                                                                                                                                                                                                                                                                                                                                                                                                                                                                                                              |   |                                |            |                                                                                       |                            |                                 |   |                            |                  |   |                            |                    |   |                            |                          |   |                            |                             |   |                            |                                                                                                        |   |                            |            |
| 5  | respiratory_pathogens_4__5                                                                                                                                      | Parainfluenza 1,2,3 or 4                                                                               |                                                                                                                                                                                                                                                                                                                                                                                                                                                                                                                                                                                                                                                                                                                                                                                                                                                              |   |                                |            |                                                                                       |                            |                                 |   |                            |                  |   |                            |                    |   |                            |                          |   |                            |                             |   |                            |                                                                                                        |   |                            |            |
| 6  | respiratory_pathogens_4__6                                                                                                                                      | Respiratory syncytial virus                                                                            |                                                                                                                                                                                                                                                                                                                                                                                                                                                                                                                                                                                                                                                                                                                                                                                                                                                              |   |                                |            |                                                                                       |                            |                                 |   |                            |                  |   |                            |                    |   |                            |                          |   |                            |                             |   |                            |                                                                                                        |   |                            |            |
| 7  | respiratory_pathogens_4__7                                                                                                                                      | Bacteria (Bordetella pertussis, Bordetella parapertussis, Chlamydia pneumoniae, Mycoplasma pneumoniae) |                                                                                                                                                                                                                                                                                                                                                                                                                                                                                                                                                                                                                                                                                                                                                                                                                                                              |   |                                |            |                                                                                       |                            |                                 |   |                            |                  |   |                            |                    |   |                            |                          |   |                            |                             |   |                            |                                                                                                        |   |                            |            |
| 8  | respiratory_pathogens_4__8                                                                                                                                      | Unknown/Un                                                                                             |                                                                                                                                                                                                                                                                                                                                                                                                                                                                                                                                                                                                                                                                                                                                                                                                                                                              |   |                                |            |                                                                                       |                            |                                 |   |                            |                  |   |                            |                    |   |                            |                          |   |                            |                             |   |                            |                                                                                                        |   |                            |            |
| 28 | <p><b>coviddiagnosis_method_5</b></p> <p>Show the field ONLY if:<br/>[covid] = '1' and [coviddi</p>                                                             | How was the fifth diagnosis made?                                                                      | dropdown <table border="1"> <tr> <td>1</td> <td>Based on PCR result</td> </tr> <tr> <td>2</td> <td>Based on antigen result</td> </tr> </table>                                                                                                                                                                                                                                                                                                                                                                                                                                                                                                                                                                                                                                                                                                               | 1 | Based on PCR result            | 2          | Based on antigen result                                                               |                            |                                 |   |                            |                  |   |                            |                    |   |                            |                          |   |                            |                             |   |                            |                                                                                                        |   |                            |            |
| 1  | Based on PCR result                                                                                                                                             |                                                                                                        |                                                                                                                                                                                                                                                                                                                                                                                                                                                                                                                                                                                                                                                                                                                                                                                                                                                              |   |                                |            |                                                                                       |                            |                                 |   |                            |                  |   |                            |                    |   |                            |                          |   |                            |                             |   |                            |                                                                                                        |   |                            |            |
| 2  | Based on antigen result                                                                                                                                         |                                                                                                        |                                                                                                                                                                                                                                                                                                                                                                                                                                                                                                                                                                                                                                                                                                                                                                                                                                                              |   |                                |            |                                                                                       |                            |                                 |   |                            |                  |   |                            |                    |   |                            |                          |   |                            |                             |   |                            |                                                                                                        |   |                            |            |

|    |                                                                                                                                                             |                                                                                                        |                                                                                                                                                                                                                                                                                                                                                                                                                                                                                                                                                                                                                                                                                                                                                                                                                                                                     |   |                                |            |                                                                                       |                            |                                 |   |                            |                  |   |                            |                    |   |                            |                          |   |                            |                             |   |                            |                                                                                                        |   |                            |            |
|----|-------------------------------------------------------------------------------------------------------------------------------------------------------------|--------------------------------------------------------------------------------------------------------|---------------------------------------------------------------------------------------------------------------------------------------------------------------------------------------------------------------------------------------------------------------------------------------------------------------------------------------------------------------------------------------------------------------------------------------------------------------------------------------------------------------------------------------------------------------------------------------------------------------------------------------------------------------------------------------------------------------------------------------------------------------------------------------------------------------------------------------------------------------------|---|--------------------------------|------------|---------------------------------------------------------------------------------------|----------------------------|---------------------------------|---|----------------------------|------------------|---|----------------------------|--------------------|---|----------------------------|--------------------------|---|----------------------------|-----------------------------|---|----------------------------|--------------------------------------------------------------------------------------------------------|---|----------------------------|------------|
|    | agnosis_multiple] = '1' and [covid_multiplereinfections] = '1'                                                                                              |                                                                                                        | <table border="1"> <tr> <td>3</td> <td>Based on serology testing</td> </tr> <tr> <td>4</td> <td>Based on diagnosis code only</td> </tr> <tr> <td>5</td> <td>Self-reported by patient</td> </tr> <tr> <td>6</td> <td>Unsure/Not available</td> </tr> </table>                                                                                                                                                                                                                                                                                                                                                                                                                                                                                                                                                                                                        | 3 | Based on serology testing      | 4          | Based on diagnosis code only                                                          | 5                          | Self-reported by patient        | 6 | Unsure/Not available       |                  |   |                            |                    |   |                            |                          |   |                            |                             |   |                            |                                                                                                        |   |                            |            |
| 3  | Based on serology testing                                                                                                                                   |                                                                                                        |                                                                                                                                                                                                                                                                                                                                                                                                                                                                                                                                                                                                                                                                                                                                                                                                                                                                     |   |                                |            |                                                                                       |                            |                                 |   |                            |                  |   |                            |                    |   |                            |                          |   |                            |                             |   |                            |                                                                                                        |   |                            |            |
| 4  | Based on diagnosis code only                                                                                                                                |                                                                                                        |                                                                                                                                                                                                                                                                                                                                                                                                                                                                                                                                                                                                                                                                                                                                                                                                                                                                     |   |                                |            |                                                                                       |                            |                                 |   |                            |                  |   |                            |                    |   |                            |                          |   |                            |                             |   |                            |                                                                                                        |   |                            |            |
| 5  | Self-reported by patient                                                                                                                                    |                                                                                                        |                                                                                                                                                                                                                                                                                                                                                                                                                                                                                                                                                                                                                                                                                                                                                                                                                                                                     |   |                                |            |                                                                                       |                            |                                 |   |                            |                  |   |                            |                    |   |                            |                          |   |                            |                             |   |                            |                                                                                                        |   |                            |            |
| 6  | Unsure/Not available                                                                                                                                        |                                                                                                        |                                                                                                                                                                                                                                                                                                                                                                                                                                                                                                                                                                                                                                                                                                                                                                                                                                                                     |   |                                |            |                                                                                       |                            |                                 |   |                            |                  |   |                            |                    |   |                            |                          |   |                            |                             |   |                            |                                                                                                        |   |                            |            |
| 29 | <p><b>coviddiagnosis_date_5</b></p> <p>Show the field ONLY if: [covid] = '1' and [coviddiagnosis_multiple] = '1' and [covid_multiplereinfections] = '1'</p> | Enter the date the fifth COVID-19 diagnosis was made:                                                  | text (date_mdy)<br>Field Annotation: @HIDEBUTTON                                                                                                                                                                                                                                                                                                                                                                                                                                                                                                                                                                                                                                                                                                                                                                                                                    |   |                                |            |                                                                                       |                            |                                 |   |                            |                  |   |                            |                    |   |                            |                          |   |                            |                             |   |                            |                                                                                                        |   |                            |            |
| 30 | <p><b>pcr_test_type_5</b></p> <p>Show the field ONLY if: [covid] = '1' and [coviddiagnosis_method_5] = '1'</p>                                              | Enter the type of PCR test:                                                                            | <p>dropdown, Required</p> <table border="1"> <tr> <td>1</td> <td>Single PCR test for SARS-CoV-2</td> </tr> <tr> <td>2</td> <td>Multiplex PCR test which tested other respiratory pathogens in addition to SARS-CoV-2</td> </tr> <tr> <td>3</td> <td>Unknown/Unavailable</td> </tr> </table>                                                                                                                                                                                                                                                                                                                                                                                                                                                                                                                                                                         | 1 | Single PCR test for SARS-CoV-2 | 2          | Multiplex PCR test which tested other respiratory pathogens in addition to SARS-CoV-2 | 3                          | Unknown/Unavailable             |   |                            |                  |   |                            |                    |   |                            |                          |   |                            |                             |   |                            |                                                                                                        |   |                            |            |
| 1  | Single PCR test for SARS-CoV-2                                                                                                                              |                                                                                                        |                                                                                                                                                                                                                                                                                                                                                                                                                                                                                                                                                                                                                                                                                                                                                                                                                                                                     |   |                                |            |                                                                                       |                            |                                 |   |                            |                  |   |                            |                    |   |                            |                          |   |                            |                             |   |                            |                                                                                                        |   |                            |            |
| 2  | Multiplex PCR test which tested other respiratory pathogens in addition to SARS-CoV-2                                                                       |                                                                                                        |                                                                                                                                                                                                                                                                                                                                                                                                                                                                                                                                                                                                                                                                                                                                                                                                                                                                     |   |                                |            |                                                                                       |                            |                                 |   |                            |                  |   |                            |                    |   |                            |                          |   |                            |                             |   |                            |                                                                                                        |   |                            |            |
| 3  | Unknown/Unavailable                                                                                                                                         |                                                                                                        |                                                                                                                                                                                                                                                                                                                                                                                                                                                                                                                                                                                                                                                                                                                                                                                                                                                                     |   |                                |            |                                                                                       |                            |                                 |   |                            |                  |   |                            |                    |   |                            |                          |   |                            |                             |   |                            |                                                                                                        |   |                            |            |
| 31 | <p><b>other_pathogen_5</b></p> <p>Show the field ONLY if: [covid] = '1' and [coviddiagnosis_method_5] = '1'</p>                                             | Did the patient have another respiratory pathogen identified within 7 days of the SARS CoV2 result?    | <p>dropdown, Required</p> <table border="1"> <tr> <td>1</td> <td>Yes, same day</td> </tr> <tr> <td>2</td> <td>Yes, not on same day but within 7 days of test</td> </tr> <tr> <td>3</td> <td>No</td> </tr> </table>                                                                                                                                                                                                                                                                                                                                                                                                                                                                                                                                                                                                                                                  | 1 | Yes, same day                  | 2          | Yes, not on same day but within 7 days of test                                        | 3                          | No                              |   |                            |                  |   |                            |                    |   |                            |                          |   |                            |                             |   |                            |                                                                                                        |   |                            |            |
| 1  | Yes, same day                                                                                                                                               |                                                                                                        |                                                                                                                                                                                                                                                                                                                                                                                                                                                                                                                                                                                                                                                                                                                                                                                                                                                                     |   |                                |            |                                                                                       |                            |                                 |   |                            |                  |   |                            |                    |   |                            |                          |   |                            |                             |   |                            |                                                                                                        |   |                            |            |
| 2  | Yes, not on same day but within 7 days of test                                                                                                              |                                                                                                        |                                                                                                                                                                                                                                                                                                                                                                                                                                                                                                                                                                                                                                                                                                                                                                                                                                                                     |   |                                |            |                                                                                       |                            |                                 |   |                            |                  |   |                            |                    |   |                            |                          |   |                            |                             |   |                            |                                                                                                        |   |                            |            |
| 3  | No                                                                                                                                                          |                                                                                                        |                                                                                                                                                                                                                                                                                                                                                                                                                                                                                                                                                                                                                                                                                                                                                                                                                                                                     |   |                                |            |                                                                                       |                            |                                 |   |                            |                  |   |                            |                    |   |                            |                          |   |                            |                             |   |                            |                                                                                                        |   |                            |            |
| 32 | <p><b>respiratory_pathogens_5</b></p> <p>Show the field ONLY if: [other_pathogen_5] = '1' or [other_pathogen_5] = '2'</p>                                   | If yes, include name(s) of other respiratory pathogen (select all that apply from the following):      | <p>checkbox, Required</p> <table border="1"> <tr> <td>1</td> <td>respiratory_pathogens_5__1</td> <td>Adenovirus</td> </tr> <tr> <td>2</td> <td>respiratory_pathogens_5__2</td> <td>Seasonal Cor (229E, HKU1, OC43)</td> </tr> <tr> <td>3</td> <td>respiratory_pathogens_5__3</td> <td>Human Metapneumo</td> </tr> <tr> <td>4</td> <td>respiratory_pathogens_5__4</td> <td>Human Rhinovirus/E</td> </tr> <tr> <td>5</td> <td>respiratory_pathogens_5__5</td> <td>Parainfluenza 1,2,3 or 4</td> </tr> <tr> <td>6</td> <td>respiratory_pathogens_5__6</td> <td>Respiratory syncytial virus</td> </tr> <tr> <td>7</td> <td>respiratory_pathogens_5__7</td> <td>Bacteria (Bordetella pertussis, Bordetella parapertussis, Chlamydia pneumoniae, Mycoplasma pneumoniae)</td> </tr> <tr> <td>8</td> <td>respiratory_pathogens_5__8</td> <td>Unknown/Ur</td> </tr> </table> | 1 | respiratory_pathogens_5__1     | Adenovirus | 2                                                                                     | respiratory_pathogens_5__2 | Seasonal Cor (229E, HKU1, OC43) | 3 | respiratory_pathogens_5__3 | Human Metapneumo | 4 | respiratory_pathogens_5__4 | Human Rhinovirus/E | 5 | respiratory_pathogens_5__5 | Parainfluenza 1,2,3 or 4 | 6 | respiratory_pathogens_5__6 | Respiratory syncytial virus | 7 | respiratory_pathogens_5__7 | Bacteria (Bordetella pertussis, Bordetella parapertussis, Chlamydia pneumoniae, Mycoplasma pneumoniae) | 8 | respiratory_pathogens_5__8 | Unknown/Ur |
| 1  | respiratory_pathogens_5__1                                                                                                                                  | Adenovirus                                                                                             |                                                                                                                                                                                                                                                                                                                                                                                                                                                                                                                                                                                                                                                                                                                                                                                                                                                                     |   |                                |            |                                                                                       |                            |                                 |   |                            |                  |   |                            |                    |   |                            |                          |   |                            |                             |   |                            |                                                                                                        |   |                            |            |
| 2  | respiratory_pathogens_5__2                                                                                                                                  | Seasonal Cor (229E, HKU1, OC43)                                                                        |                                                                                                                                                                                                                                                                                                                                                                                                                                                                                                                                                                                                                                                                                                                                                                                                                                                                     |   |                                |            |                                                                                       |                            |                                 |   |                            |                  |   |                            |                    |   |                            |                          |   |                            |                             |   |                            |                                                                                                        |   |                            |            |
| 3  | respiratory_pathogens_5__3                                                                                                                                  | Human Metapneumo                                                                                       |                                                                                                                                                                                                                                                                                                                                                                                                                                                                                                                                                                                                                                                                                                                                                                                                                                                                     |   |                                |            |                                                                                       |                            |                                 |   |                            |                  |   |                            |                    |   |                            |                          |   |                            |                             |   |                            |                                                                                                        |   |                            |            |
| 4  | respiratory_pathogens_5__4                                                                                                                                  | Human Rhinovirus/E                                                                                     |                                                                                                                                                                                                                                                                                                                                                                                                                                                                                                                                                                                                                                                                                                                                                                                                                                                                     |   |                                |            |                                                                                       |                            |                                 |   |                            |                  |   |                            |                    |   |                            |                          |   |                            |                             |   |                            |                                                                                                        |   |                            |            |
| 5  | respiratory_pathogens_5__5                                                                                                                                  | Parainfluenza 1,2,3 or 4                                                                               |                                                                                                                                                                                                                                                                                                                                                                                                                                                                                                                                                                                                                                                                                                                                                                                                                                                                     |   |                                |            |                                                                                       |                            |                                 |   |                            |                  |   |                            |                    |   |                            |                          |   |                            |                             |   |                            |                                                                                                        |   |                            |            |
| 6  | respiratory_pathogens_5__6                                                                                                                                  | Respiratory syncytial virus                                                                            |                                                                                                                                                                                                                                                                                                                                                                                                                                                                                                                                                                                                                                                                                                                                                                                                                                                                     |   |                                |            |                                                                                       |                            |                                 |   |                            |                  |   |                            |                    |   |                            |                          |   |                            |                             |   |                            |                                                                                                        |   |                            |            |
| 7  | respiratory_pathogens_5__7                                                                                                                                  | Bacteria (Bordetella pertussis, Bordetella parapertussis, Chlamydia pneumoniae, Mycoplasma pneumoniae) |                                                                                                                                                                                                                                                                                                                                                                                                                                                                                                                                                                                                                                                                                                                                                                                                                                                                     |   |                                |            |                                                                                       |                            |                                 |   |                            |                  |   |                            |                    |   |                            |                          |   |                            |                             |   |                            |                                                                                                        |   |                            |            |
| 8  | respiratory_pathogens_5__8                                                                                                                                  | Unknown/Ur                                                                                             |                                                                                                                                                                                                                                                                                                                                                                                                                                                                                                                                                                                                                                                                                                                                                                                                                                                                     |   |                                |            |                                                                                       |                            |                                 |   |                            |                  |   |                            |                    |   |                            |                          |   |                            |                             |   |                            |                                                                                                        |   |                            |            |

|    |                                                                                                               |                                                                                                                                                                                                                                                                                          |                                                                                                                                                                                                                                                                                                                                                                                                         |   |                                                                       |   |                                                                                                               |   |                        |   |                     |   |             |   |               |
|----|---------------------------------------------------------------------------------------------------------------|------------------------------------------------------------------------------------------------------------------------------------------------------------------------------------------------------------------------------------------------------------------------------------------|---------------------------------------------------------------------------------------------------------------------------------------------------------------------------------------------------------------------------------------------------------------------------------------------------------------------------------------------------------------------------------------------------------|---|-----------------------------------------------------------------------|---|---------------------------------------------------------------------------------------------------------------|---|------------------------|---|---------------------|---|-------------|---|---------------|
| 33 | <p><b>end_date</b></p> <p>Show the field ONLY if:<br/>[covid] = '1'</p>                                       | <p>End Date: Enter the study Follow-up Period End Date for this patient. The End Date will be either a) 1 year after the last diagnosis of COVID-19, or b) if the patient has less than 1 year of follow-up from their last COVID diagnosis in the chart, the latest date available.</p> | <p>text (date_mdy), Required<br/>Field Annotation: @HIDEBUTTON</p>                                                                                                                                                                                                                                                                                                                                      |   |                                                                       |   |                                                                                                               |   |                        |   |                     |   |             |   |               |
| 34 | <p><b>end_date_reason</b></p> <p>Show the field ONLY if:<br/>[covid] = '1'</p>                                | <p>Enter the reason for the Follow-up Period End Date for this patient:</p>                                                                                                                                                                                                              | <p>dropdown, Required</p> <table border="1" data-bbox="1057 363 1549 558"> <tr> <td>1</td> <td>End of 1 year of follow-up from the patient's last COVID-19 diagnosis</td> </tr> <tr> <td>2</td> <td>End of available information in the patient's chart; less than 1 year of follow-up available for this patient</td> </tr> </table> <p>Field Annotation: @HIDEBUTTON</p>                              | 1 | End of 1 year of follow-up from the patient's last COVID-19 diagnosis | 2 | End of available information in the patient's chart; less than 1 year of follow-up available for this patient |   |                        |   |                     |   |             |   |               |
| 1  | End of 1 year of follow-up from the patient's last COVID-19 diagnosis                                         |                                                                                                                                                                                                                                                                                          |                                                                                                                                                                                                                                                                                                                                                                                                         |   |                                                                       |   |                                                                                                               |   |                        |   |                     |   |             |   |               |
| 2  | End of available information in the patient's chart; less than 1 year of follow-up available for this patient |                                                                                                                                                                                                                                                                                          |                                                                                                                                                                                                                                                                                                                                                                                                         |   |                                                                       |   |                                                                                                               |   |                        |   |                     |   |             |   |               |
| 35 | <p><b>sex</b></p> <p>Show the field ONLY if:<br/>[covid] = '1'</p>                                            | <p>Section Header: <i>Section 2. Demographics</i></p> <p>Patient Sex:</p>                                                                                                                                                                                                                | <p>radio, Required</p> <table border="1" data-bbox="1057 674 1187 772"> <tr> <td>1</td> <td>Male</td> </tr> <tr> <td>2</td> <td>Female</td> </tr> </table>                                                                                                                                                                                                                                              | 1 | Male                                                                  | 2 | Female                                                                                                        |   |                        |   |                     |   |             |   |               |
| 1  | Male                                                                                                          |                                                                                                                                                                                                                                                                                          |                                                                                                                                                                                                                                                                                                                                                                                                         |   |                                                                       |   |                                                                                                               |   |                        |   |                     |   |             |   |               |
| 2  | Female                                                                                                        |                                                                                                                                                                                                                                                                                          |                                                                                                                                                                                                                                                                                                                                                                                                         |   |                                                                       |   |                                                                                                               |   |                        |   |                     |   |             |   |               |
| 36 | <p><b>race</b></p> <p>Show the field ONLY if:<br/>[covid] = '1'</p>                                           | <p>Race:</p>                                                                                                                                                                                                                                                                             | <p>radio, Required</p> <table border="1" data-bbox="1057 825 1528 1115"> <tr> <td>1</td> <td>American Indian/Alaska Native</td> </tr> <tr> <td>2</td> <td>Asian/Native Hawaiian/Pacific Islander</td> </tr> <tr> <td>3</td> <td>Black/African-American</td> </tr> <tr> <td>4</td> <td>White</td> </tr> <tr> <td>5</td> <td>Multiracial</td> </tr> <tr> <td>6</td> <td>Other/Missing</td> </tr> </table> | 1 | American Indian/Alaska Native                                         | 2 | Asian/Native Hawaiian/Pacific Islander                                                                        | 3 | Black/African-American | 4 | White               | 5 | Multiracial | 6 | Other/Missing |
| 1  | American Indian/Alaska Native                                                                                 |                                                                                                                                                                                                                                                                                          |                                                                                                                                                                                                                                                                                                                                                                                                         |   |                                                                       |   |                                                                                                               |   |                        |   |                     |   |             |   |               |
| 2  | Asian/Native Hawaiian/Pacific Islander                                                                        |                                                                                                                                                                                                                                                                                          |                                                                                                                                                                                                                                                                                                                                                                                                         |   |                                                                       |   |                                                                                                               |   |                        |   |                     |   |             |   |               |
| 3  | Black/African-American                                                                                        |                                                                                                                                                                                                                                                                                          |                                                                                                                                                                                                                                                                                                                                                                                                         |   |                                                                       |   |                                                                                                               |   |                        |   |                     |   |             |   |               |
| 4  | White                                                                                                         |                                                                                                                                                                                                                                                                                          |                                                                                                                                                                                                                                                                                                                                                                                                         |   |                                                                       |   |                                                                                                               |   |                        |   |                     |   |             |   |               |
| 5  | Multiracial                                                                                                   |                                                                                                                                                                                                                                                                                          |                                                                                                                                                                                                                                                                                                                                                                                                         |   |                                                                       |   |                                                                                                               |   |                        |   |                     |   |             |   |               |
| 6  | Other/Missing                                                                                                 |                                                                                                                                                                                                                                                                                          |                                                                                                                                                                                                                                                                                                                                                                                                         |   |                                                                       |   |                                                                                                               |   |                        |   |                     |   |             |   |               |
| 37 | <p><b>ethnicity</b></p> <p>Show the field ONLY if:<br/>[covid] = '1'</p>                                      | <p>Ethnicity:</p>                                                                                                                                                                                                                                                                        | <p>radio, Required</p> <table border="1" data-bbox="1057 1167 1256 1314"> <tr> <td>1</td> <td>Hispanic</td> </tr> <tr> <td>2</td> <td>Non-Hispanic</td> </tr> <tr> <td>3</td> <td>Unknown</td> </tr> </table>                                                                                                                                                                                           | 1 | Hispanic                                                              | 2 | Non-Hispanic                                                                                                  | 3 | Unknown                |   |                     |   |             |   |               |
| 1  | Hispanic                                                                                                      |                                                                                                                                                                                                                                                                                          |                                                                                                                                                                                                                                                                                                                                                                                                         |   |                                                                       |   |                                                                                                               |   |                        |   |                     |   |             |   |               |
| 2  | Non-Hispanic                                                                                                  |                                                                                                                                                                                                                                                                                          |                                                                                                                                                                                                                                                                                                                                                                                                         |   |                                                                       |   |                                                                                                               |   |                        |   |                     |   |             |   |               |
| 3  | Unknown                                                                                                       |                                                                                                                                                                                                                                                                                          |                                                                                                                                                                                                                                                                                                                                                                                                         |   |                                                                       |   |                                                                                                               |   |                        |   |                     |   |             |   |               |
| 38 | <p><b>payer</b></p> <p>Show the field ONLY if:<br/>[covid] = '1'</p>                                          | <p>Payer:</p>                                                                                                                                                                                                                                                                            | <p>radio, Required</p> <table border="1" data-bbox="1057 1377 1370 1570"> <tr> <td>1</td> <td>Private/commercial</td> </tr> <tr> <td>2</td> <td>Public (Medicaid/SCHIP)</td> </tr> <tr> <td>3</td> <td>Other</td> </tr> <tr> <td>4</td> <td>Unknown/Unavailable</td> </tr> </table>                                                                                                                     | 1 | Private/commercial                                                    | 2 | Public (Medicaid/SCHIP)                                                                                       | 3 | Other                  | 4 | Unknown/Unavailable |   |             |   |               |
| 1  | Private/commercial                                                                                            |                                                                                                                                                                                                                                                                                          |                                                                                                                                                                                                                                                                                                                                                                                                         |   |                                                                       |   |                                                                                                               |   |                        |   |                     |   |             |   |               |
| 2  | Public (Medicaid/SCHIP)                                                                                       |                                                                                                                                                                                                                                                                                          |                                                                                                                                                                                                                                                                                                                                                                                                         |   |                                                                       |   |                                                                                                               |   |                        |   |                     |   |             |   |               |
| 3  | Other                                                                                                         |                                                                                                                                                                                                                                                                                          |                                                                                                                                                                                                                                                                                                                                                                                                         |   |                                                                       |   |                                                                                                               |   |                        |   |                     |   |             |   |               |
| 4  | Unknown/Unavailable                                                                                           |                                                                                                                                                                                                                                                                                          |                                                                                                                                                                                                                                                                                                                                                                                                         |   |                                                                       |   |                                                                                                               |   |                        |   |                     |   |             |   |               |
| 39 | <p><b>dob</b></p> <p>Show the field ONLY if:<br/>[covid] = '1'</p>                                            | <p>Patient Date of Birth:</p>                                                                                                                                                                                                                                                            | <p>text (date_mdy), Required<br/>Field Annotation: @HIDEBUTTON</p>                                                                                                                                                                                                                                                                                                                                      |   |                                                                       |   |                                                                                                               |   |                        |   |                     |   |             |   |               |
| 40 | <p><b>covic_clinic</b></p> <p>Show the field ONLY if:<br/>[covid] = '1'</p>                                   | <p>Section Header: <i>Section 3. COVID Treatments</i></p> <p>Was this patient seen in a long covid clinic/other clinic dedicated to the care of patients with PASC?</p>                                                                                                                  | <p>dropdown, Required</p> <table border="1" data-bbox="1057 1755 1328 1902"> <tr> <td>1</td> <td>Yes</td> </tr> <tr> <td>2</td> <td>No</td> </tr> <tr> <td>3</td> <td>Unsure/Unavailable</td> </tr> </table>                                                                                                                                                                                            | 1 | Yes                                                                   | 2 | No                                                                                                            | 3 | Unsure/Unavailable     |   |                     |   |             |   |               |
| 1  | Yes                                                                                                           |                                                                                                                                                                                                                                                                                          |                                                                                                                                                                                                                                                                                                                                                                                                         |   |                                                                       |   |                                                                                                               |   |                        |   |                     |   |             |   |               |
| 2  | No                                                                                                            |                                                                                                                                                                                                                                                                                          |                                                                                                                                                                                                                                                                                                                                                                                                         |   |                                                                       |   |                                                                                                               |   |                        |   |                     |   |             |   |               |
| 3  | Unsure/Unavailable                                                                                            |                                                                                                                                                                                                                                                                                          |                                                                                                                                                                                                                                                                                                                                                                                                         |   |                                                                       |   |                                                                                                               |   |                        |   |                     |   |             |   |               |

|    |                                                                                                                                                                                                                                                                        |                                                                                                                                |                                                                                                                                                                                                                                                                                                    |   |     |   |    |   |                    |   |   |   |   |   |             |   |                    |
|----|------------------------------------------------------------------------------------------------------------------------------------------------------------------------------------------------------------------------------------------------------------------------|--------------------------------------------------------------------------------------------------------------------------------|----------------------------------------------------------------------------------------------------------------------------------------------------------------------------------------------------------------------------------------------------------------------------------------------------|---|-----|---|----|---|--------------------|---|---|---|---|---|-------------|---|--------------------|
| 41 | <p><b>evusheld</b></p> <p>Show the field ONLY if:<br/>[covid] = '1'</p>                                                                                                                                                                                                | <p>Did the patient receive evusheld (tixagevimab co-packaged with cilgavimab) as a prevention strategy against SARS-CoV-2?</p> | <p>dropdown, Required</p> <table border="1"> <tr><td>1</td><td>Yes</td></tr> <tr><td>2</td><td>No</td></tr> <tr><td>3</td><td>Unsure/Unavailable</td></tr> </table>                                                                                                                                | 1 | Yes | 2 | No | 3 | Unsure/Unavailable |   |   |   |   |   |             |   |                    |
| 1  | Yes                                                                                                                                                                                                                                                                    |                                                                                                                                |                                                                                                                                                                                                                                                                                                    |   |     |   |    |   |                    |   |   |   |   |   |             |   |                    |
| 2  | No                                                                                                                                                                                                                                                                     |                                                                                                                                |                                                                                                                                                                                                                                                                                                    |   |     |   |    |   |                    |   |   |   |   |   |             |   |                    |
| 3  | Unsure/Unavailable                                                                                                                                                                                                                                                     |                                                                                                                                |                                                                                                                                                                                                                                                                                                    |   |     |   |    |   |                    |   |   |   |   |   |             |   |                    |
| 42 | <p><b>evusheld_doses</b></p> <p>Show the field ONLY if:<br/>[covid] = '1' and [evusheld] = '1'</p>                                                                                                                                                                     | <p>If yes, how many doses of evusheld did the patient receive during the study period?</p>                                     | <p>dropdown, Required</p> <table border="1"> <tr><td>1</td><td>1</td></tr> <tr><td>2</td><td>2</td></tr> <tr><td>3</td><td>3</td></tr> <tr><td>4</td><td>4</td></tr> <tr><td>5</td><td>5</td></tr> <tr><td>6</td><td>More than 5</td></tr> <tr><td>9</td><td>Unsure/Unavailable</td></tr> </table> | 1 | 1   | 2 | 2  | 3 | 3                  | 4 | 4 | 5 | 5 | 6 | More than 5 | 9 | Unsure/Unavailable |
| 1  | 1                                                                                                                                                                                                                                                                      |                                                                                                                                |                                                                                                                                                                                                                                                                                                    |   |     |   |    |   |                    |   |   |   |   |   |             |   |                    |
| 2  | 2                                                                                                                                                                                                                                                                      |                                                                                                                                |                                                                                                                                                                                                                                                                                                    |   |     |   |    |   |                    |   |   |   |   |   |             |   |                    |
| 3  | 3                                                                                                                                                                                                                                                                      |                                                                                                                                |                                                                                                                                                                                                                                                                                                    |   |     |   |    |   |                    |   |   |   |   |   |             |   |                    |
| 4  | 4                                                                                                                                                                                                                                                                      |                                                                                                                                |                                                                                                                                                                                                                                                                                                    |   |     |   |    |   |                    |   |   |   |   |   |             |   |                    |
| 5  | 5                                                                                                                                                                                                                                                                      |                                                                                                                                |                                                                                                                                                                                                                                                                                                    |   |     |   |    |   |                    |   |   |   |   |   |             |   |                    |
| 6  | More than 5                                                                                                                                                                                                                                                            |                                                                                                                                |                                                                                                                                                                                                                                                                                                    |   |     |   |    |   |                    |   |   |   |   |   |             |   |                    |
| 9  | Unsure/Unavailable                                                                                                                                                                                                                                                     |                                                                                                                                |                                                                                                                                                                                                                                                                                                    |   |     |   |    |   |                    |   |   |   |   |   |             |   |                    |
| 43 | <p><b>evusheld_dose1_date</b></p> <p>Show the field ONLY if:<br/>[covid] = '1' and [evusheld] = '1' and ([evusheld_doses] = '1' or [evusheld_doses] = '2' or [evusheld_doses] = '3' or [evusheld_doses] = '4' or [evusheld_doses] = '5' or [evusheld_doses] = '6')</p> | <p>What was the date of administration of the first dose of evusheld?</p>                                                      | <p>text (date_mdy), Required<br/>Field Annotation: @HIDEBUTTON</p>                                                                                                                                                                                                                                 |   |     |   |    |   |                    |   |   |   |   |   |             |   |                    |
| 44 | <p><b>evusheld_dose2_date</b></p> <p>Show the field ONLY if:<br/>[covid] = '1' and [evusheld] = '1' and ([evusheld_doses] = '2' or [evusheld_doses] = '3' or [evusheld_doses] = '4' or [evusheld_doses] = '5' or [evusheld_doses] = '6')</p>                           | <p>What was the date of administration of the second dose of evusheld?</p>                                                     | <p>text (date_mdy), Required<br/>Field Annotation: @HIDEBUTTON</p>                                                                                                                                                                                                                                 |   |     |   |    |   |                    |   |   |   |   |   |             |   |                    |
| 45 | <p><b>evusheld_dose3_date</b></p> <p>Show the field ONLY if:<br/>[covid] = '1' and [evusheld] = '1' and ([evusheld_doses] = '3' or [evusheld_doses] = '4' or [evusheld_doses] = '5' or [evusheld_doses] = '6')</p>                                                     | <p>What was the date of administration of the third dose of evusheld?</p>                                                      | <p>text (date_mdy), Required<br/>Field Annotation: @HIDEBUTTON</p>                                                                                                                                                                                                                                 |   |     |   |    |   |                    |   |   |   |   |   |             |   |                    |
| 46 | <p><b>evusheld_dose4_date</b></p> <p>Show the field ONLY if:</p>                                                                                                                                                                                                       | <p>What was the date of administration of the fourth dose of evusheld?</p>                                                     | <p>text (date_mdy), Required<br/>Field Annotation: @HIDEBUTTON</p>                                                                                                                                                                                                                                 |   |     |   |    |   |                    |   |   |   |   |   |             |   |                    |

|    |                                                                                                                                                                                                                                                                         |                                                                                                  |                                                                                                                                                                                                                                                                                                                                    |   |              |   |                              |   |                            |   |            |   |                     |   |             |   |                    |
|----|-------------------------------------------------------------------------------------------------------------------------------------------------------------------------------------------------------------------------------------------------------------------------|--------------------------------------------------------------------------------------------------|------------------------------------------------------------------------------------------------------------------------------------------------------------------------------------------------------------------------------------------------------------------------------------------------------------------------------------|---|--------------|---|------------------------------|---|----------------------------|---|------------|---|---------------------|---|-------------|---|--------------------|
|    | [covid] = '1' and [evusheld] = '1' and ([evusheld_doses] = '4' or [evusheld_doses] = '5' or [evusheld_doses] = '6')                                                                                                                                                     |                                                                                                  |                                                                                                                                                                                                                                                                                                                                    |   |              |   |                              |   |                            |   |            |   |                     |   |             |   |                    |
| 47 | <b>evusheld_dose5_date</b><br><br>Show the field ONLY if: [covid] = '1' and [evusheld] = '1' and ([evusheld_doses] = '5' or [evusheld_doses] = '6')                                                                                                                     | What was the date of administration of the fifth dose of evusheld?                               | text (date_mdy), Required<br>Field Annotation: @HIDEBUTTON                                                                                                                                                                                                                                                                         |   |              |   |                              |   |                            |   |            |   |                     |   |             |   |                    |
| 48 | <b>monoclonal</b><br><br>Show the field ONLY if: [covid] = '1'                                                                                                                                                                                                          | Did the patient receive monoclonal antibodies as their treatment for SARS CoV2?                  | dropdown, Required<br><table border="1"> <tr><td>1</td><td>Yes</td></tr> <tr><td>2</td><td>No</td></tr> <tr><td>3</td><td>Unsure/Unavailable</td></tr> </table>                                                                                                                                                                    | 1 | Yes          | 2 | No                           | 3 | Unsure/Unavailable         |   |            |   |                     |   |             |   |                    |
| 1  | Yes                                                                                                                                                                                                                                                                     |                                                                                                  |                                                                                                                                                                                                                                                                                                                                    |   |              |   |                              |   |                            |   |            |   |                     |   |             |   |                    |
| 2  | No                                                                                                                                                                                                                                                                      |                                                                                                  |                                                                                                                                                                                                                                                                                                                                    |   |              |   |                              |   |                            |   |            |   |                     |   |             |   |                    |
| 3  | Unsure/Unavailable                                                                                                                                                                                                                                                      |                                                                                                  |                                                                                                                                                                                                                                                                                                                                    |   |              |   |                              |   |                            |   |            |   |                     |   |             |   |                    |
| 49 | <b>monoclonal_doses</b><br><br>Show the field ONLY if: [covid] = '1' and [monoclonal] = '1'                                                                                                                                                                             | If yes, how many doses of monoclonal antibodies did the patient receive during the study period? | dropdown, Required<br><table border="1"> <tr><td>1</td><td>1</td></tr> <tr><td>2</td><td>2</td></tr> <tr><td>3</td><td>3</td></tr> <tr><td>4</td><td>4</td></tr> <tr><td>5</td><td>5</td></tr> <tr><td>6</td><td>More than 5</td></tr> <tr><td>9</td><td>Unsure/Unavailable</td></tr> </table>                                     | 1 | 1            | 2 | 2                            | 3 | 3                          | 4 | 4          | 5 | 5                   | 6 | More than 5 | 9 | Unsure/Unavailable |
| 1  | 1                                                                                                                                                                                                                                                                       |                                                                                                  |                                                                                                                                                                                                                                                                                                                                    |   |              |   |                              |   |                            |   |            |   |                     |   |             |   |                    |
| 2  | 2                                                                                                                                                                                                                                                                       |                                                                                                  |                                                                                                                                                                                                                                                                                                                                    |   |              |   |                              |   |                            |   |            |   |                     |   |             |   |                    |
| 3  | 3                                                                                                                                                                                                                                                                       |                                                                                                  |                                                                                                                                                                                                                                                                                                                                    |   |              |   |                              |   |                            |   |            |   |                     |   |             |   |                    |
| 4  | 4                                                                                                                                                                                                                                                                       |                                                                                                  |                                                                                                                                                                                                                                                                                                                                    |   |              |   |                              |   |                            |   |            |   |                     |   |             |   |                    |
| 5  | 5                                                                                                                                                                                                                                                                       |                                                                                                  |                                                                                                                                                                                                                                                                                                                                    |   |              |   |                              |   |                            |   |            |   |                     |   |             |   |                    |
| 6  | More than 5                                                                                                                                                                                                                                                             |                                                                                                  |                                                                                                                                                                                                                                                                                                                                    |   |              |   |                              |   |                            |   |            |   |                     |   |             |   |                    |
| 9  | Unsure/Unavailable                                                                                                                                                                                                                                                      |                                                                                                  |                                                                                                                                                                                                                                                                                                                                    |   |              |   |                              |   |                            |   |            |   |                     |   |             |   |                    |
| 50 | <b>monoclonal_date_1</b><br><br>Show the field ONLY if: [covid] = '1' and [monoclonal] = '1' and ([monoclonal_doses] = '1' or [monoclonal_doses] = '2' or [monoclonal_doses] = '3' or [monoclonal_doses] = '4' or [monoclonal_doses] = '5' or [monoclonal_doses] = '6') | What was the date of administration of the first dose of monoclonal antibodies?                  | text (date_mdy), Required<br>Field Annotation: @HIDEBUTTON                                                                                                                                                                                                                                                                         |   |              |   |                              |   |                            |   |            |   |                     |   |             |   |                    |
| 51 | <b>monoclonal_type_1</b><br><br>Show the field ONLY if: [covid] = '1' and [monoclonal] = '1' and ([monoclonal_doses] = '1' or [monoclonal_doses] = '2' or [monoclonal_doses] = '3' or [monoclonal_doses] = '4' or [monoclonal_doses] = '5' or [monoclonal_doses] = '6') | What type of monoclonal antibodies did the patient receive as their first dose of treatment?     | dropdown, Required<br><table border="1"> <tr><td>1</td><td>Bebtelovimab</td></tr> <tr><td>2</td><td>Bamlanivimab plus etesevimab</td></tr> <tr><td>3</td><td>Casirivimab plus imdevimab</td></tr> <tr><td>4</td><td>Sotrovimab</td></tr> <tr><td>5</td><td>Unknown/Unavailable</td></tr> </table><br>Field Annotation: @HIDEBUTTON | 1 | Bebtelovimab | 2 | Bamlanivimab plus etesevimab | 3 | Casirivimab plus imdevimab | 4 | Sotrovimab | 5 | Unknown/Unavailable |   |             |   |                    |
| 1  | Bebtelovimab                                                                                                                                                                                                                                                            |                                                                                                  |                                                                                                                                                                                                                                                                                                                                    |   |              |   |                              |   |                            |   |            |   |                     |   |             |   |                    |
| 2  | Bamlanivimab plus etesevimab                                                                                                                                                                                                                                            |                                                                                                  |                                                                                                                                                                                                                                                                                                                                    |   |              |   |                              |   |                            |   |            |   |                     |   |             |   |                    |
| 3  | Casirivimab plus imdevimab                                                                                                                                                                                                                                              |                                                                                                  |                                                                                                                                                                                                                                                                                                                                    |   |              |   |                              |   |                            |   |            |   |                     |   |             |   |                    |
| 4  | Sotrovimab                                                                                                                                                                                                                                                              |                                                                                                  |                                                                                                                                                                                                                                                                                                                                    |   |              |   |                              |   |                            |   |            |   |                     |   |             |   |                    |
| 5  | Unknown/Unavailable                                                                                                                                                                                                                                                     |                                                                                                  |                                                                                                                                                                                                                                                                                                                                    |   |              |   |                              |   |                            |   |            |   |                     |   |             |   |                    |

|    |                                                                                                                                                                                                                                                        |                                                                                               |                                                                                                                                                                                                                                                                                                                                            |   |              |   |                              |   |                            |   |            |   |                     |
|----|--------------------------------------------------------------------------------------------------------------------------------------------------------------------------------------------------------------------------------------------------------|-----------------------------------------------------------------------------------------------|--------------------------------------------------------------------------------------------------------------------------------------------------------------------------------------------------------------------------------------------------------------------------------------------------------------------------------------------|---|--------------|---|------------------------------|---|----------------------------|---|------------|---|---------------------|
|    | oses] = '6')                                                                                                                                                                                                                                           |                                                                                               |                                                                                                                                                                                                                                                                                                                                            |   |              |   |                              |   |                            |   |            |   |                     |
| 52 | <p><b>monoclonal_date_2</b></p> <p>Show the field ONLY if:<br/>[covid] = '1' and [monoclonal] = '1' and ([monoclonal_doses] = '2' or [monoclonal_doses] = '3' or [monoclonal_doses] = '4' or [monoclonal_doses] = '5' or [monoclonal_doses] = '6')</p> | What was the date of administration of the second dose of monoclonal antibodies?              | text (date_mdy), Required<br>Field Annotation: @HIDEBUTTON                                                                                                                                                                                                                                                                                 |   |              |   |                              |   |                            |   |            |   |                     |
| 53 | <p><b>monoclonal_type_2</b></p> <p>Show the field ONLY if:<br/>[covid] = '1' and [monoclonal] = '1' and ([monoclonal_doses] = '2' or [monoclonal_doses] = '3' or [monoclonal_doses] = '4' or [monoclonal_doses] = '5' or [monoclonal_doses] = '6')</p> | What type of monoclonal antibodies did the patient receive as their second dose of treatment? | <p>dropdown, Required</p> <table border="1"> <tr><td>1</td><td>Bebtelovimab</td></tr> <tr><td>2</td><td>Bamlanivimab plus etesevimab</td></tr> <tr><td>3</td><td>Casirivimab plus imdevimab</td></tr> <tr><td>4</td><td>Sotrovimab</td></tr> <tr><td>5</td><td>Unknown/Unavailable</td></tr> </table> <p>Field Annotation: @HIDEBUTTON</p> | 1 | Bebtelovimab | 2 | Bamlanivimab plus etesevimab | 3 | Casirivimab plus imdevimab | 4 | Sotrovimab | 5 | Unknown/Unavailable |
| 1  | Bebtelovimab                                                                                                                                                                                                                                           |                                                                                               |                                                                                                                                                                                                                                                                                                                                            |   |              |   |                              |   |                            |   |            |   |                     |
| 2  | Bamlanivimab plus etesevimab                                                                                                                                                                                                                           |                                                                                               |                                                                                                                                                                                                                                                                                                                                            |   |              |   |                              |   |                            |   |            |   |                     |
| 3  | Casirivimab plus imdevimab                                                                                                                                                                                                                             |                                                                                               |                                                                                                                                                                                                                                                                                                                                            |   |              |   |                              |   |                            |   |            |   |                     |
| 4  | Sotrovimab                                                                                                                                                                                                                                             |                                                                                               |                                                                                                                                                                                                                                                                                                                                            |   |              |   |                              |   |                            |   |            |   |                     |
| 5  | Unknown/Unavailable                                                                                                                                                                                                                                    |                                                                                               |                                                                                                                                                                                                                                                                                                                                            |   |              |   |                              |   |                            |   |            |   |                     |
| 54 | <p><b>monoclonal_date_3</b></p> <p>Show the field ONLY if:<br/>[covid] = '1' and [monoclonal] = '1' and ([monoclonal_doses] = '3' or [monoclonal_doses] = '4' or [monoclonal_doses] = '5' or [monoclonal_doses] = '6')</p>                             | What was the date of administration of the third dose of monoclonal antibodies?               | text (date_mdy), Required<br>Field Annotation: @HIDEBUTTON                                                                                                                                                                                                                                                                                 |   |              |   |                              |   |                            |   |            |   |                     |
| 55 | <p><b>monoclonal_type_3</b></p> <p>Show the field ONLY if:<br/>[covid] = '1' and [monoclonal] = '1' and ([monoclonal_doses] = '3' or [monoclonal_doses] = '4' or [monoclonal_doses] = '5' or [monoclonal_doses] = '6')</p>                             | What type of monoclonal antibodies did the patient receive as their third dose of treatment?  | <p>dropdown, Required</p> <table border="1"> <tr><td>1</td><td>Bebtelovimab</td></tr> <tr><td>2</td><td>Bamlanivimab plus etesevimab</td></tr> <tr><td>3</td><td>Casirivimab plus imdevimab</td></tr> <tr><td>4</td><td>Sotrovimab</td></tr> <tr><td>5</td><td>Unknown/Unavailable</td></tr> </table> <p>Field Annotation: @HIDEBUTTON</p> | 1 | Bebtelovimab | 2 | Bamlanivimab plus etesevimab | 3 | Casirivimab plus imdevimab | 4 | Sotrovimab | 5 | Unknown/Unavailable |
| 1  | Bebtelovimab                                                                                                                                                                                                                                           |                                                                                               |                                                                                                                                                                                                                                                                                                                                            |   |              |   |                              |   |                            |   |            |   |                     |
| 2  | Bamlanivimab plus etesevimab                                                                                                                                                                                                                           |                                                                                               |                                                                                                                                                                                                                                                                                                                                            |   |              |   |                              |   |                            |   |            |   |                     |
| 3  | Casirivimab plus imdevimab                                                                                                                                                                                                                             |                                                                                               |                                                                                                                                                                                                                                                                                                                                            |   |              |   |                              |   |                            |   |            |   |                     |
| 4  | Sotrovimab                                                                                                                                                                                                                                             |                                                                                               |                                                                                                                                                                                                                                                                                                                                            |   |              |   |                              |   |                            |   |            |   |                     |
| 5  | Unknown/Unavailable                                                                                                                                                                                                                                    |                                                                                               |                                                                                                                                                                                                                                                                                                                                            |   |              |   |                              |   |                            |   |            |   |                     |
| 56 | <p><b>monoclonal_date_4</b></p> <p>Show the field ONLY if:<br/>[covid] = '1' and [monoclonal] = '1' and ([monoclonal_doses] = '4' or [monoclonal_doses] = '5' or [monoclonal_doses] = '6')</p>                                                         | What was the date of administration of the fourth dose of monoclonal antibodies?              | text (date_mdy), Required<br>Field Annotation: @HIDEBUTTON                                                                                                                                                                                                                                                                                 |   |              |   |                              |   |                            |   |            |   |                     |
| 57 | <p><b>monoclonal_type_4</b></p>                                                                                                                                                                                                                        | What type of monoclonal antibodies did the patient receive as their fourth dose of treatment? | dropdown, Required                                                                                                                                                                                                                                                                                                                         |   |              |   |                              |   |                            |   |            |   |                     |

|    |                                                                                                                                                                    |                                                                                                               |                                                                                                                                                                                                                                                                                                                                            |   |                 |   |                              |   |                            |   |                     |   |                     |
|----|--------------------------------------------------------------------------------------------------------------------------------------------------------------------|---------------------------------------------------------------------------------------------------------------|--------------------------------------------------------------------------------------------------------------------------------------------------------------------------------------------------------------------------------------------------------------------------------------------------------------------------------------------|---|-----------------|---|------------------------------|---|----------------------------|---|---------------------|---|---------------------|
|    | <p>Show the field ONLY if:<br/>[covid] = '1' and [monoclonal] = '1' and ([monoclonal_doses] = '4' or [monoclonal_doses] = '5' or [monoclonal_doses] = '6')</p>     |                                                                                                               | <table border="1"> <tr><td>1</td><td>Bebtelovimab</td></tr> <tr><td>2</td><td>Bamlanivimab plus etesevimab</td></tr> <tr><td>3</td><td>Casirivimab plus imdevimab</td></tr> <tr><td>4</td><td>Sotrovimab</td></tr> <tr><td>5</td><td>Unknown/Unavailable</td></tr> </table> <p>Field Annotation: @HIDEBUTTON</p>                           | 1 | Bebtelovimab    | 2 | Bamlanivimab plus etesevimab | 3 | Casirivimab plus imdevimab | 4 | Sotrovimab          | 5 | Unknown/Unavailable |
| 1  | Bebtelovimab                                                                                                                                                       |                                                                                                               |                                                                                                                                                                                                                                                                                                                                            |   |                 |   |                              |   |                            |   |                     |   |                     |
| 2  | Bamlanivimab plus etesevimab                                                                                                                                       |                                                                                                               |                                                                                                                                                                                                                                                                                                                                            |   |                 |   |                              |   |                            |   |                     |   |                     |
| 3  | Casirivimab plus imdevimab                                                                                                                                         |                                                                                                               |                                                                                                                                                                                                                                                                                                                                            |   |                 |   |                              |   |                            |   |                     |   |                     |
| 4  | Sotrovimab                                                                                                                                                         |                                                                                                               |                                                                                                                                                                                                                                                                                                                                            |   |                 |   |                              |   |                            |   |                     |   |                     |
| 5  | Unknown/Unavailable                                                                                                                                                |                                                                                                               |                                                                                                                                                                                                                                                                                                                                            |   |                 |   |                              |   |                            |   |                     |   |                     |
| 58 | <p><b>monoclonal_date_5</b></p> <p>Show the field ONLY if:<br/>[covid] = '1' and [monoclonal] = '1' and ([monoclonal_doses] = '5' or [monoclonal_doses] = '6')</p> | <p>What was the date of administration of the fifth dose of monoclonal antibodies?</p>                        | <p>text (date_mdy), Required<br/>Field Annotation: @HIDEBUTTON</p>                                                                                                                                                                                                                                                                         |   |                 |   |                              |   |                            |   |                     |   |                     |
| 59 | <p><b>monoclonal_type_5</b></p> <p>Show the field ONLY if:<br/>[covid] = '1' and [monoclonal] = '1' and ([monoclonal_doses] = '5' or [monoclonal_doses] = '6')</p> | <p>What type of monoclonal antibodies did the patient receive as their fifth dose of treatment?</p>           | <p>dropdown, Required</p> <table border="1"> <tr><td>1</td><td>Bebtelovimab</td></tr> <tr><td>2</td><td>Bamlanivimab plus etesevimab</td></tr> <tr><td>3</td><td>Casirivimab plus imdevimab</td></tr> <tr><td>4</td><td>Sotrovimab</td></tr> <tr><td>5</td><td>Unknown/Unavailable</td></tr> </table> <p>Field Annotation: @HIDEBUTTON</p> | 1 | Bebtelovimab    | 2 | Bamlanivimab plus etesevimab | 3 | Casirivimab plus imdevimab | 4 | Sotrovimab          | 5 | Unknown/Unavailable |
| 1  | Bebtelovimab                                                                                                                                                       |                                                                                                               |                                                                                                                                                                                                                                                                                                                                            |   |                 |   |                              |   |                            |   |                     |   |                     |
| 2  | Bamlanivimab plus etesevimab                                                                                                                                       |                                                                                                               |                                                                                                                                                                                                                                                                                                                                            |   |                 |   |                              |   |                            |   |                     |   |                     |
| 3  | Casirivimab plus imdevimab                                                                                                                                         |                                                                                                               |                                                                                                                                                                                                                                                                                                                                            |   |                 |   |                              |   |                            |   |                     |   |                     |
| 4  | Sotrovimab                                                                                                                                                         |                                                                                                               |                                                                                                                                                                                                                                                                                                                                            |   |                 |   |                              |   |                            |   |                     |   |                     |
| 5  | Unknown/Unavailable                                                                                                                                                |                                                                                                               |                                                                                                                                                                                                                                                                                                                                            |   |                 |   |                              |   |                            |   |                     |   |                     |
| 60 | <p><b>vaccine_status</b></p> <p>Show the field ONLY if:<br/>[covid] = '1'</p>                                                                                      | <p>Section Header: <i>Section 4. Vaccination</i></p> <p>Did this patient ever receive a COVID-19 vaccine?</p> | <p>dropdown, Required</p> <table border="1"> <tr><td>1</td><td>Yes</td></tr> <tr><td>2</td><td>No</td></tr> <tr><td>3</td><td>Unknown</td></tr> </table>                                                                                                                                                                                   | 1 | Yes             | 2 | No                           | 3 | Unknown                    |   |                     |   |                     |
| 1  | Yes                                                                                                                                                                |                                                                                                               |                                                                                                                                                                                                                                                                                                                                            |   |                 |   |                              |   |                            |   |                     |   |                     |
| 2  | No                                                                                                                                                                 |                                                                                                               |                                                                                                                                                                                                                                                                                                                                            |   |                 |   |                              |   |                            |   |                     |   |                     |
| 3  | Unknown                                                                                                                                                            |                                                                                                               |                                                                                                                                                                                                                                                                                                                                            |   |                 |   |                              |   |                            |   |                     |   |                     |
| 61 | <p><b>vaccine_date</b></p> <p>Show the field ONLY if:<br/>[covid] = '1' and [vaccine_status] = '1'</p>                                                             | <p>Enter the date of their first COVID-19 vaccine:</p>                                                        | <p>text (date_mdy), Required<br/>Field Annotation: @HIDEBUTTON</p>                                                                                                                                                                                                                                                                         |   |                 |   |                              |   |                            |   |                     |   |                     |
| 62 | <p><b>vaccine_brand</b></p> <p>Show the field ONLY if:<br/>[covid] = '1' and [vaccine_status] = '1'</p>                                                            | <p>Select the vaccine they received as their first dose:</p>                                                  | <p>dropdown, Required</p> <table border="1"> <tr><td>1</td><td>Pfizer/BioNTech</td></tr> <tr><td>2</td><td>Moderna</td></tr> <tr><td>3</td><td>J&amp;J/Janssen</td></tr> <tr><td>4</td><td>Unknown/Unavailable</td></tr> </table>                                                                                                          | 1 | Pfizer/BioNTech | 2 | Moderna                      | 3 | J&J/Janssen                | 4 | Unknown/Unavailable |   |                     |
| 1  | Pfizer/BioNTech                                                                                                                                                    |                                                                                                               |                                                                                                                                                                                                                                                                                                                                            |   |                 |   |                              |   |                            |   |                     |   |                     |
| 2  | Moderna                                                                                                                                                            |                                                                                                               |                                                                                                                                                                                                                                                                                                                                            |   |                 |   |                              |   |                            |   |                     |   |                     |
| 3  | J&J/Janssen                                                                                                                                                        |                                                                                                               |                                                                                                                                                                                                                                                                                                                                            |   |                 |   |                              |   |                            |   |                     |   |                     |
| 4  | Unknown/Unavailable                                                                                                                                                |                                                                                                               |                                                                                                                                                                                                                                                                                                                                            |   |                 |   |                              |   |                            |   |                     |   |                     |
| 63 | <p><b>vaccine_number</b></p> <p>Show the field ONLY if:<br/>[covid] = '1' and [vaccine_status] = '1'</p>                                                           | <p>Did this patient receive multiple doses of the COVID-19 vaccine?</p>                                       | <p>yesno, Required</p> <table border="1"> <tr><td>1</td><td>Yes</td></tr> <tr><td>0</td><td>No</td></tr> </table>                                                                                                                                                                                                                          | 1 | Yes             | 0 | No                           |   |                            |   |                     |   |                     |
| 1  | Yes                                                                                                                                                                |                                                                                                               |                                                                                                                                                                                                                                                                                                                                            |   |                 |   |                              |   |                            |   |                     |   |                     |
| 0  | No                                                                                                                                                                 |                                                                                                               |                                                                                                                                                                                                                                                                                                                                            |   |                 |   |                              |   |                            |   |                     |   |                     |
| 64 | <p><b>vaccine_date_2</b></p> <p>Show the field ONLY if:<br/>[covid] = '1' and [vaccine</p>                                                                         | <p>Enter the date of their second COVID-19 vaccine:</p>                                                       | <p>text (date_mdy), Required<br/>Field Annotation: @HIDEBUTTON</p>                                                                                                                                                                                                                                                                         |   |                 |   |                              |   |                            |   |                     |   |                     |

|    |                                                                                                                                                    |                                                                                                                                                                                                                                     |                                                                                                                                                                                                                               |   |                 |   |         |   |             |   |                     |
|----|----------------------------------------------------------------------------------------------------------------------------------------------------|-------------------------------------------------------------------------------------------------------------------------------------------------------------------------------------------------------------------------------------|-------------------------------------------------------------------------------------------------------------------------------------------------------------------------------------------------------------------------------|---|-----------------|---|---------|---|-------------|---|---------------------|
|    | <code>_status] = '1' and [vaccine_number] = '1'</code>                                                                                             |                                                                                                                                                                                                                                     |                                                                                                                                                                                                                               |   |                 |   |         |   |             |   |                     |
| 65 | <p><b>vaccine_brand_2</b></p> <p>Show the field ONLY if:<br/> <code>[covid] = '1' and [vaccine_status] = '1' and [vaccine_number] = '1'</code></p> | Select the vaccine they received as their second dose:                                                                                                                                                                              | dropdown, Required<br><table border="1"> <tr><td>1</td><td>Pfizer/BioNTech</td></tr> <tr><td>2</td><td>Moderna</td></tr> <tr><td>3</td><td>J&amp;J/Janssen</td></tr> <tr><td>4</td><td>Unknown/Unavailable</td></tr> </table> | 1 | Pfizer/BioNTech | 2 | Moderna | 3 | J&J/Janssen | 4 | Unknown/Unavailable |
| 1  | Pfizer/BioNTech                                                                                                                                    |                                                                                                                                                                                                                                     |                                                                                                                                                                                                                               |   |                 |   |         |   |             |   |                     |
| 2  | Moderna                                                                                                                                            |                                                                                                                                                                                                                                     |                                                                                                                                                                                                                               |   |                 |   |         |   |             |   |                     |
| 3  | J&J/Janssen                                                                                                                                        |                                                                                                                                                                                                                                     |                                                                                                                                                                                                                               |   |                 |   |         |   |             |   |                     |
| 4  | Unknown/Unavailable                                                                                                                                |                                                                                                                                                                                                                                     |                                                                                                                                                                                                                               |   |                 |   |         |   |             |   |                     |
| 66 | <p><b>vaccine_date_3</b></p> <p>Show the field ONLY if:<br/> <code>[covid] = '1' and [vaccine_status] = '1' and [vaccine_number] = '1'</code></p>  | Enter the date of their third COVID-19 vaccine:                                                                                                                                                                                     | text (date_mdy)<br>Field Annotation: @HIDEBUTTON                                                                                                                                                                              |   |                 |   |         |   |             |   |                     |
| 67 | <p><b>vaccine_brand_3</b></p> <p>Show the field ONLY if:<br/> <code>[covid] = '1' and [vaccine_status] = '1' and [vaccine_number] = '1'</code></p> | Select the vaccine they received as their third dose:                                                                                                                                                                               | dropdown<br><table border="1"> <tr><td>1</td><td>Pfizer/BioNTech</td></tr> <tr><td>2</td><td>Moderna</td></tr> <tr><td>3</td><td>J&amp;J/Janssen</td></tr> <tr><td>4</td><td>Unknown/Unavailable</td></tr> </table>           | 1 | Pfizer/BioNTech | 2 | Moderna | 3 | J&J/Janssen | 4 | Unknown/Unavailable |
| 1  | Pfizer/BioNTech                                                                                                                                    |                                                                                                                                                                                                                                     |                                                                                                                                                                                                                               |   |                 |   |         |   |             |   |                     |
| 2  | Moderna                                                                                                                                            |                                                                                                                                                                                                                                     |                                                                                                                                                                                                                               |   |                 |   |         |   |             |   |                     |
| 3  | J&J/Janssen                                                                                                                                        |                                                                                                                                                                                                                                     |                                                                                                                                                                                                                               |   |                 |   |         |   |             |   |                     |
| 4  | Unknown/Unavailable                                                                                                                                |                                                                                                                                                                                                                                     |                                                                                                                                                                                                                               |   |                 |   |         |   |             |   |                     |
| 68 | <p><b>vaccine_date_4</b></p> <p>Show the field ONLY if:<br/> <code>[covid] = '1' and [vaccine_status] = '1' and [vaccine_number] = '1'</code></p>  | Enter the date of their fourth COVID-19 vaccine:                                                                                                                                                                                    | text (date_mdy)<br>Field Annotation: @HIDEBUTTON                                                                                                                                                                              |   |                 |   |         |   |             |   |                     |
| 69 | <p><b>vaccine_brand_4</b></p> <p>Show the field ONLY if:<br/> <code>[covid] = '1' and [vaccine_status] = '1' and [vaccine_number] = '1'</code></p> | Select the vaccine they received as their fourth dose:                                                                                                                                                                              | dropdown<br><table border="1"> <tr><td>1</td><td>Pfizer/BioNTech</td></tr> <tr><td>2</td><td>Moderna</td></tr> <tr><td>3</td><td>J&amp;J/Janssen</td></tr> <tr><td>4</td><td>Unknown/Unavailable</td></tr> </table>           | 1 | Pfizer/BioNTech | 2 | Moderna | 3 | J&J/Janssen | 4 | Unknown/Unavailable |
| 1  | Pfizer/BioNTech                                                                                                                                    |                                                                                                                                                                                                                                     |                                                                                                                                                                                                                               |   |                 |   |         |   |             |   |                     |
| 2  | Moderna                                                                                                                                            |                                                                                                                                                                                                                                     |                                                                                                                                                                                                                               |   |                 |   |         |   |             |   |                     |
| 3  | J&J/Janssen                                                                                                                                        |                                                                                                                                                                                                                                     |                                                                                                                                                                                                                               |   |                 |   |         |   |             |   |                     |
| 4  | Unknown/Unavailable                                                                                                                                |                                                                                                                                                                                                                                     |                                                                                                                                                                                                                               |   |                 |   |         |   |             |   |                     |
| 70 | <p><b>vaccine_date_5</b></p> <p>Show the field ONLY if:<br/> <code>[covid] = '1' and [vaccine_status] = '1' and [vaccine_number] = '1'</code></p>  | Enter the date of their fifth COVID-19 vaccine:                                                                                                                                                                                     | text (date_mdy)<br>Field Annotation: @HIDEBUTTON                                                                                                                                                                              |   |                 |   |         |   |             |   |                     |
| 71 | <p><b>vaccine_brand_5</b></p> <p>Show the field ONLY if:<br/> <code>[covid] = '1' and [vaccine_status] = '1' and [vaccine_number] = '1'</code></p> | Select the vaccine they received as their fifth dose:                                                                                                                                                                               | dropdown<br><table border="1"> <tr><td>1</td><td>Pfizer/BioNTech</td></tr> <tr><td>2</td><td>Moderna</td></tr> <tr><td>3</td><td>J&amp;J/Janssen</td></tr> <tr><td>4</td><td>Unknown/Unavailable</td></tr> </table>           | 1 | Pfizer/BioNTech | 2 | Moderna | 3 | J&J/Janssen | 4 | Unknown/Unavailable |
| 1  | Pfizer/BioNTech                                                                                                                                    |                                                                                                                                                                                                                                     |                                                                                                                                                                                                                               |   |                 |   |         |   |             |   |                     |
| 2  | Moderna                                                                                                                                            |                                                                                                                                                                                                                                     |                                                                                                                                                                                                                               |   |                 |   |         |   |             |   |                     |
| 3  | J&J/Janssen                                                                                                                                        |                                                                                                                                                                                                                                     |                                                                                                                                                                                                                               |   |                 |   |         |   |             |   |                     |
| 4  | Unknown/Unavailable                                                                                                                                |                                                                                                                                                                                                                                     |                                                                                                                                                                                                                               |   |                 |   |         |   |             |   |                     |
| 72 | <p><b>functional_available</b></p> <p>Show the field ONLY if:</p>                                                                                  | Section Header: <i>Section 5. Functional Outcomes This section is looking for results from the period starting 28 days after the first date of COVID-19 infection.</i><br><br>Is there any documentation available in the patient's | dropdown, Required<br><table border="1"> <tr><td>1</td><td>Yes</td></tr> <tr><td>0</td><td>No</td></tr> </table>                                                                                                              | 1 | Yes             | 0 | No      |   |             |   |                     |
| 1  | Yes                                                                                                                                                |                                                                                                                                                                                                                                     |                                                                                                                                                                                                                               |   |                 |   |         |   |             |   |                     |
| 0  | No                                                                                                                                                 |                                                                                                                                                                                                                                     |                                                                                                                                                                                                                               |   |                 |   |         |   |             |   |                     |

|    |                                                                                                                                                                                                                                 |                                                                                                                                |                                                                                                                            |
|----|---------------------------------------------------------------------------------------------------------------------------------------------------------------------------------------------------------------------------------|--------------------------------------------------------------------------------------------------------------------------------|----------------------------------------------------------------------------------------------------------------------------|
|    | [covid] = '1'                                                                                                                                                                                                                   | chart on functional outcomes<br>(Behavioral/Psychological symptoms, school missingness, extracurricular activity changes, etc) | 2   Unsure/Unavailable                                                                                                     |
| 73 | <b>behavioral_symptoms</b><br><br>Show the field ONLY if:<br>[covid] = '1' and [functional_available] = '1'                                                                                                                     | Has the patient had behavioral and/or psychological symptoms post-COVID-19 infection?                                          | dropdown, Required<br>1   Yes<br>0   No<br>2   Unsure/Unavailable                                                          |
| 74 | <b>behavioral_symptoms_describe</b><br><br>Show the field ONLY if:<br>[covid] = '1' and [behavioral_symptoms] = '1'                                                                                                             | Please describe:                                                                                                               | notes, Required                                                                                                            |
| 75 | <b>behavior_symptoms_prior</b><br><br>Show the field ONLY if:<br>[covid] = '1' and [behavioral_symptoms] = '1'                                                                                                                  | Were any of these symptoms present prior to COVID-19 infection?                                                                | radio, Required<br>1   Yes<br>2   No<br>3   Unknown/Unavailable                                                            |
| 76 | <b>behavior_symptoms_prior_detail</b><br><br>Show the field ONLY if:<br>[covid] = '1' and [behavioral_symptoms] = '1' and [behavior_symptoms_prior] = '1'                                                                       | Describe symptoms present prior to COVID:                                                                                      | notes, Required                                                                                                            |
| 77 | <b>behavior_symptoms_change</b><br><br>Show the field ONLY if:<br>[covid] = '1' and [behavioral_symptoms] = '1' and [behavior_symptoms_prior] = '1'                                                                             | Did the symptoms change post COVID19?                                                                                          | radio, Required<br>1   Yes- symptoms became worse post-COVID<br>2   Yes- symptoms improved post COVID<br>3   No, no change |
| 78 | <b>behavior_change_description</b><br><br>Show the field ONLY if:<br>[covid] = '1' and [behavioral_symptoms] = '1' and [behavior_symptoms_prior] = '1' and [behavior_symptoms_change] = '1' or [behavior_symptoms_change] = '2' | Please describe how symptoms changed post COVID.                                                                               | notes, Required                                                                                                            |
| 79 | <b>psych_referral</b><br><br>Show the field ONLY if:<br>[covid] = '1' and [functional_available] = '1'                                                                                                                          | Has the patient been referred to psychological or behavior services since COVID-19 infection?                                  | yesno, Required<br>1   Yes<br>0   No                                                                                       |
| 80 | <b>psych_referral_desc</b>                                                                                                                                                                                                      | Please describe the psychological or behavior                                                                                  | notes, Required                                                                                                            |

|    |                                                                                                                                                                           |                                                                                                                                      |                                                                                                                                                                                                                                                                                                                                                                                                                                                                                                                                                                                                                                |   |                      |                       |           |                      |                           |   |                      |                               |   |                      |                     |   |                      |                                                                        |   |                      |                   |
|----|---------------------------------------------------------------------------------------------------------------------------------------------------------------------------|--------------------------------------------------------------------------------------------------------------------------------------|--------------------------------------------------------------------------------------------------------------------------------------------------------------------------------------------------------------------------------------------------------------------------------------------------------------------------------------------------------------------------------------------------------------------------------------------------------------------------------------------------------------------------------------------------------------------------------------------------------------------------------|---|----------------------|-----------------------|-----------|----------------------|---------------------------|---|----------------------|-------------------------------|---|----------------------|---------------------|---|----------------------|------------------------------------------------------------------------|---|----------------------|-------------------|
|    | <p><b>ribe</b></p> <p>Show the field ONLY if:<br/>[covid] = '1' and [functional_available] = '1' and [psych_referral] = '1'</p>                                           | services the patient was referred to since COVID-19 infection:                                                                       |                                                                                                                                                                                                                                                                                                                                                                                                                                                                                                                                                                                                                                |   |                      |                       |           |                      |                           |   |                      |                               |   |                      |                     |   |                      |                                                                        |   |                      |                   |
| 81 | <p><b>extracurriculars</b></p> <p>Show the field ONLY if:<br/>[covid] = '1' and [functional_available] = '1'</p>                                                          | Is there any evidence the patient has missed extracurricular activities (sports, band, dance, etc.) since COVID-19 infection?        | <p>yesno, Required</p> <table border="1"> <tr> <td>1</td> <td>Yes</td> </tr> <tr> <td>0</td> <td>No</td> </tr> </table>                                                                                                                                                                                                                                                                                                                                                                                                                                                                                                        | 1 | Yes                  | 0                     | No        |                      |                           |   |                      |                               |   |                      |                     |   |                      |                                                                        |   |                      |                   |
| 1  | Yes                                                                                                                                                                       |                                                                                                                                      |                                                                                                                                                                                                                                                                                                                                                                                                                                                                                                                                                                                                                                |   |                      |                       |           |                      |                           |   |                      |                               |   |                      |                     |   |                      |                                                                        |   |                      |                   |
| 0  | No                                                                                                                                                                        |                                                                                                                                      |                                                                                                                                                                                                                                                                                                                                                                                                                                                                                                                                                                                                                                |   |                      |                       |           |                      |                           |   |                      |                               |   |                      |                     |   |                      |                                                                        |   |                      |                   |
| 82 | <p><b>extracurriculars_describe</b></p> <p>Show the field ONLY if:<br/>[covid] = '1' and [functional_available] = '1' and [extracurriculars] = '1'</p>                    | Please describe the evidence the patient has missed extracurricular activities (sports, band, dance, etc.) since COVID-19 infection. | notes, Required                                                                                                                                                                                                                                                                                                                                                                                                                                                                                                                                                                                                                |   |                      |                       |           |                      |                           |   |                      |                               |   |                      |                     |   |                      |                                                                        |   |                      |                   |
| 83 | <p><b>therapy_postcovid</b></p> <p>Show the field ONLY if:<br/>[covid] = '1' and [coviddiagnosis_age] = '1' and [functional_available] = '1'</p>                          | Has the patient required any of the following since COVID-19 infection?                                                              | <p>checkbox, Required</p> <table border="1"> <tr> <td>1</td> <td>therapy_postcovid__1</td> <td>Physical therapy (PT)</td> </tr> <tr> <td>2</td> <td>therapy_postcovid__2</td> <td>Occupational therapy (OT)</td> </tr> <tr> <td>3</td> <td>therapy_postcovid__3</td> <td>Speech language therapy (SLP)</td> </tr> <tr> <td>4</td> <td>therapy_postcovid__4</td> <td>Special instruction</td> </tr> <tr> <td>5</td> <td>therapy_postcovid__5</td> <td>Early intervention (EI) referral/Individual Family Service Plan (IFSP)</td> </tr> <tr> <td>6</td> <td>therapy_postcovid__6</td> <td>None of the above</td> </tr> </table> | 1 | therapy_postcovid__1 | Physical therapy (PT) | 2         | therapy_postcovid__2 | Occupational therapy (OT) | 3 | therapy_postcovid__3 | Speech language therapy (SLP) | 4 | therapy_postcovid__4 | Special instruction | 5 | therapy_postcovid__5 | Early intervention (EI) referral/Individual Family Service Plan (IFSP) | 6 | therapy_postcovid__6 | None of the above |
| 1  | therapy_postcovid__1                                                                                                                                                      | Physical therapy (PT)                                                                                                                |                                                                                                                                                                                                                                                                                                                                                                                                                                                                                                                                                                                                                                |   |                      |                       |           |                      |                           |   |                      |                               |   |                      |                     |   |                      |                                                                        |   |                      |                   |
| 2  | therapy_postcovid__2                                                                                                                                                      | Occupational therapy (OT)                                                                                                            |                                                                                                                                                                                                                                                                                                                                                                                                                                                                                                                                                                                                                                |   |                      |                       |           |                      |                           |   |                      |                               |   |                      |                     |   |                      |                                                                        |   |                      |                   |
| 3  | therapy_postcovid__3                                                                                                                                                      | Speech language therapy (SLP)                                                                                                        |                                                                                                                                                                                                                                                                                                                                                                                                                                                                                                                                                                                                                                |   |                      |                       |           |                      |                           |   |                      |                               |   |                      |                     |   |                      |                                                                        |   |                      |                   |
| 4  | therapy_postcovid__4                                                                                                                                                      | Special instruction                                                                                                                  |                                                                                                                                                                                                                                                                                                                                                                                                                                                                                                                                                                                                                                |   |                      |                       |           |                      |                           |   |                      |                               |   |                      |                     |   |                      |                                                                        |   |                      |                   |
| 5  | therapy_postcovid__5                                                                                                                                                      | Early intervention (EI) referral/Individual Family Service Plan (IFSP)                                                               |                                                                                                                                                                                                                                                                                                                                                                                                                                                                                                                                                                                                                                |   |                      |                       |           |                      |                           |   |                      |                               |   |                      |                     |   |                      |                                                                        |   |                      |                   |
| 6  | therapy_postcovid__6                                                                                                                                                      | None of the above                                                                                                                    |                                                                                                                                                                                                                                                                                                                                                                                                                                                                                                                                                                                                                                |   |                      |                       |           |                      |                           |   |                      |                               |   |                      |                     |   |                      |                                                                        |   |                      |                   |
| 84 | <p><b>pt_date</b></p> <p>Show the field ONLY if:<br/>[covid] = '1' and [coviddiagnosis_age] = '1' and [functional_available] = '1' and [therapy_postcovid(1)] = '1'</p>   | Enter earliest date Physical Therapy treatment began post COVID-19 infection.                                                        | text (date_mdy), Required<br>Field Annotation: @HIDEBUTTON                                                                                                                                                                                                                                                                                                                                                                                                                                                                                                                                                                     |   |                      |                       |           |                      |                           |   |                      |                               |   |                      |                     |   |                      |                                                                        |   |                      |                   |
| 85 | <p><b>pt_status</b></p> <p>Show the field ONLY if:<br/>[covid] = '1' and [coviddiagnosis_age] = '1' and [functional_available] = '1' and [therapy_postcovid(1)] = '1'</p> | Enter current status of Physical Therapy treatment:                                                                                  | <p>radio, Required</p> <table border="1"> <tr> <td>1</td> <td>Ongoing</td> </tr> <tr> <td>2</td> <td>Completed</td> </tr> <tr> <td>3</td> <td>Unsure</td> </tr> </table> <p>Field Annotation: @HIDEBUTTON</p>                                                                                                                                                                                                                                                                                                                                                                                                                  | 1 | Ongoing              | 2                     | Completed | 3                    | Unsure                    |   |                      |                               |   |                      |                     |   |                      |                                                                        |   |                      |                   |
| 1  | Ongoing                                                                                                                                                                   |                                                                                                                                      |                                                                                                                                                                                                                                                                                                                                                                                                                                                                                                                                                                                                                                |   |                      |                       |           |                      |                           |   |                      |                               |   |                      |                     |   |                      |                                                                        |   |                      |                   |
| 2  | Completed                                                                                                                                                                 |                                                                                                                                      |                                                                                                                                                                                                                                                                                                                                                                                                                                                                                                                                                                                                                                |   |                      |                       |           |                      |                           |   |                      |                               |   |                      |                     |   |                      |                                                                        |   |                      |                   |
| 3  | Unsure                                                                                                                                                                    |                                                                                                                                      |                                                                                                                                                                                                                                                                                                                                                                                                                                                                                                                                                                                                                                |   |                      |                       |           |                      |                           |   |                      |                               |   |                      |                     |   |                      |                                                                        |   |                      |                   |

|           |                                                                                                                                                                                                    |                                                                                             |                                                                                                                                                                                                                                               |   |         |   |           |   |        |
|-----------|----------------------------------------------------------------------------------------------------------------------------------------------------------------------------------------------------|---------------------------------------------------------------------------------------------|-----------------------------------------------------------------------------------------------------------------------------------------------------------------------------------------------------------------------------------------------|---|---------|---|-----------|---|--------|
| <p>86</p> | <p><b>pt_last_date</b></p> <p>Show the field ONLY if:<br/>[covid] = '1' and [coviddiagnosis_age] = '1' and [functional_available] = '1' and [therapy_postcovid(1)] = '1' and [pt_status] = '2'</p> | <p>Enter date of last Physical Therapy treatment:</p>                                       | <p>text (date_mdy), Required<br/>Field Annotation: @HIDEBUTTON</p>                                                                                                                                                                            |   |         |   |           |   |        |
| <p>87</p> | <p><b>ot_date</b></p> <p>Show the field ONLY if:<br/>[covid] = '1' and [coviddiagnosis_age] = '1' and [functional_available] = '1' and [therapy_postcovid(2)] = '1'</p>                            | <p>Enter earliest date Occupational Therapy treatment began post COVID-19 infection.</p>    | <p>text (date_mdy), Required<br/>Field Annotation: @HIDEBUTTON</p>                                                                                                                                                                            |   |         |   |           |   |        |
| <p>88</p> | <p><b>ot_status</b></p> <p>Show the field ONLY if:<br/>[covid] = '1' and [coviddiagnosis_age] = '1' and [functional_available] = '1' and [therapy_postcovid(2)] = '1'</p>                          | <p>Enter current status of Occupational Therapy treatment:</p>                              | <p>radio, Required</p> <table border="1" data-bbox="1057 705 1230 856"> <tr> <td>1</td> <td>Ongoing</td> </tr> <tr> <td>2</td> <td>Completed</td> </tr> <tr> <td>3</td> <td>Unsure</td> </tr> </table> <p>Field Annotation: @HIDEBUTTON</p>   | 1 | Ongoing | 2 | Completed | 3 | Unsure |
| 1         | Ongoing                                                                                                                                                                                            |                                                                                             |                                                                                                                                                                                                                                               |   |         |   |           |   |        |
| 2         | Completed                                                                                                                                                                                          |                                                                                             |                                                                                                                                                                                                                                               |   |         |   |           |   |        |
| 3         | Unsure                                                                                                                                                                                             |                                                                                             |                                                                                                                                                                                                                                               |   |         |   |           |   |        |
| <p>89</p> | <p><b>ot_last_date</b></p> <p>Show the field ONLY if:<br/>[covid] = '1' and [coviddiagnosis_age] = '1' and [functional_available] = '1' and [therapy_postcovid(2)] = '1' and [ot_status] = '2'</p> | <p>Enter date of last Occupational Therapy treatment:</p>                                   | <p>text (date_mdy), Required<br/>Field Annotation: @HIDEBUTTON</p>                                                                                                                                                                            |   |         |   |           |   |        |
| <p>90</p> | <p><b>speech_therapy_date</b></p> <p>Show the field ONLY if:<br/>[covid] = '1' and [coviddiagnosis_age] = '1' and [functional_available] = '1' and [therapy_postcovid(3)] = '1'</p>                | <p>Enter earliest date Speech Language Therapy treatment began post COVID-19 infection.</p> | <p>text (date_mdy), Required<br/>Field Annotation: @HIDEBUTTON</p>                                                                                                                                                                            |   |         |   |           |   |        |
| <p>91</p> | <p><b>speech_therapy_status</b></p> <p>Show the field ONLY if:<br/>[covid] = '1' and [coviddiagnosis_age] = '1' and [functional_available] = '1' and [therapy_postcovid(3)] = '1'</p>              | <p>Enter current status of Speech Language Therapy treatment:</p>                           | <p>radio, Required</p> <table border="1" data-bbox="1057 1575 1230 1726"> <tr> <td>1</td> <td>Ongoing</td> </tr> <tr> <td>2</td> <td>Completed</td> </tr> <tr> <td>3</td> <td>Unsure</td> </tr> </table> <p>Field Annotation: @HIDEBUTTON</p> | 1 | Ongoing | 2 | Completed | 3 | Unsure |
| 1         | Ongoing                                                                                                                                                                                            |                                                                                             |                                                                                                                                                                                                                                               |   |         |   |           |   |        |
| 2         | Completed                                                                                                                                                                                          |                                                                                             |                                                                                                                                                                                                                                               |   |         |   |           |   |        |
| 3         | Unsure                                                                                                                                                                                             |                                                                                             |                                                                                                                                                                                                                                               |   |         |   |           |   |        |
| <p>92</p> | <p><b>speech_therapy_last_date</b></p>                                                                                                                                                             | <p>Enter date of last Speech Language Therapy treatment:</p>                                | <p>text (date_mdy), Required<br/>Field Annotation: @HIDEBUTTON</p>                                                                                                                                                                            |   |         |   |           |   |        |

|    |                                                                                                                                                                                                                                     |                                                                                                                           |                                                                                                                                                                                                               |   |         |   |           |   |        |
|----|-------------------------------------------------------------------------------------------------------------------------------------------------------------------------------------------------------------------------------------|---------------------------------------------------------------------------------------------------------------------------|---------------------------------------------------------------------------------------------------------------------------------------------------------------------------------------------------------------|---|---------|---|-----------|---|--------|
|    | <p>Show the field ONLY if:<br/>[covid] = '1' and [coviddiagnosis_age] = '1' and [functional_available] = '1' and [therapy_postcovid(3)] = '1' and [speech_therapy_status] = '2'</p>                                                 |                                                                                                                           |                                                                                                                                                                                                               |   |         |   |           |   |        |
| 93 | <p><b>special_instruction_date</b></p> <p>Show the field ONLY if:<br/>[covid] = '1' and [coviddiagnosis_age] = '1' and [functional_available] = '1' and [therapy_postcovid(4)] = '1'</p>                                            | Enter earliest date Special Instruction treatment began post COVID-19 infection.                                          | text (date_mdy), Required<br>Field Annotation: @HIDEBUTTON                                                                                                                                                    |   |         |   |           |   |        |
| 94 | <p><b>special_instruction_status</b></p> <p>Show the field ONLY if:<br/>[covid] = '1' and [coviddiagnosis_age] = '1' and [functional_available] = '1' and [therapy_postcovid(4)] = '1'</p>                                          | Enter current status of Special Instruction treatment:                                                                    | <p>radio, Required</p> <table border="1"> <tr> <td>1</td> <td>Ongoing</td> </tr> <tr> <td>2</td> <td>Completed</td> </tr> <tr> <td>3</td> <td>Unsure</td> </tr> </table> <p>Field Annotation: @HIDEBUTTON</p> | 1 | Ongoing | 2 | Completed | 3 | Unsure |
| 1  | Ongoing                                                                                                                                                                                                                             |                                                                                                                           |                                                                                                                                                                                                               |   |         |   |           |   |        |
| 2  | Completed                                                                                                                                                                                                                           |                                                                                                                           |                                                                                                                                                                                                               |   |         |   |           |   |        |
| 3  | Unsure                                                                                                                                                                                                                              |                                                                                                                           |                                                                                                                                                                                                               |   |         |   |           |   |        |
| 95 | <p><b>special_instruction_lastdate</b></p> <p>Show the field ONLY if:<br/>[covid] = '1' and [coviddiagnosis_age] = '1' and [functional_available] = '1' and [therapy_postcovid(4)] = '1' and [special_instruction_status] = '2'</p> | Enter date of last Special Instruction treatment:                                                                         | text (date_mdy), Required<br>Field Annotation: @HIDEBUTTON                                                                                                                                                    |   |         |   |           |   |        |
| 96 | <p><b>early_intervene_date</b></p> <p>Show the field ONLY if:<br/>[covid] = '1' and [coviddiagnosis_age] = '1' and [functional_available] = '1' and [therapy_postcovid(5)] = '1'</p>                                                | Enter earliest date Early intervention (EI) referral/Individual Family Service Plan (IFSP) began post COVID-19 infection. | text (date_mdy), Required<br>Field Annotation: @HIDEBUTTON                                                                                                                                                    |   |         |   |           |   |        |
| 97 | <p><b>early_intervene_status</b></p> <p>Show the field ONLY if:<br/>[covid] = '1' and [coviddiagnosis_age] = '1' and [functional_available] = '1' and [therapy_postcovid(5)] = '1'</p>                                              | Enter current status of Early intervention (EI) referral/Individual Family Service Plan (IFSP) treatment.                 | <p>radio, Required</p> <table border="1"> <tr> <td>1</td> <td>Ongoing</td> </tr> <tr> <td>2</td> <td>Completed</td> </tr> <tr> <td>3</td> <td>Unsure</td> </tr> </table> <p>Field Annotation: @HIDEBUTTON</p> | 1 | Ongoing | 2 | Completed | 3 | Unsure |
| 1  | Ongoing                                                                                                                                                                                                                             |                                                                                                                           |                                                                                                                                                                                                               |   |         |   |           |   |        |
| 2  | Completed                                                                                                                                                                                                                           |                                                                                                                           |                                                                                                                                                                                                               |   |         |   |           |   |        |
| 3  | Unsure                                                                                                                                                                                                                              |                                                                                                                           |                                                                                                                                                                                                               |   |         |   |           |   |        |
| 98 | <p><b>early_intervene_last</b></p>                                                                                                                                                                                                  | Enter date of last Early intervention (EI)                                                                                | text (date_mdy), Required                                                                                                                                                                                     |   |         |   |           |   |        |

|     |                                                                                                                                                                                                                                         |                                                                                                           |                                                                                                                                                                                                                                                                                                  |   |                          |   |                      |   |                      |   |                                 |   |                    |
|-----|-----------------------------------------------------------------------------------------------------------------------------------------------------------------------------------------------------------------------------------------|-----------------------------------------------------------------------------------------------------------|--------------------------------------------------------------------------------------------------------------------------------------------------------------------------------------------------------------------------------------------------------------------------------------------------|---|--------------------------|---|----------------------|---|----------------------|---|---------------------------------|---|--------------------|
|     | <p><b>tdate</b></p> <p>Show the field ONLY if:<br/>[covid] = '1' and [coviddiagnosis_age] = '1' and [functional_available] = '1' and [therapy_postcovid(5)] = '1' and [early_intervene_status] = '2'</p>                                | referral/Individual Family Service Plan (IFSP) treatment.                                                 | Field Annotation: @HIDEBUTTON                                                                                                                                                                                                                                                                    |   |                          |   |                      |   |                      |   |                                 |   |                    |
| 99  | <p><b>school_missing_evidence</b></p> <p>Show the field ONLY if:<br/>[covid] = '1' and [functional_available] = '1' and [coviddiagnosis_age] = '2'</p>                                                                                  | Is there any evidence that the patient has missed school following recovery from COVID-19 infection?      | <p>yesno, Required</p> <table border="1"> <tr> <td>1</td> <td>Yes</td> </tr> <tr> <td>0</td> <td>No</td> </tr> </table>                                                                                                                                                                          | 1 | Yes                      | 0 | No                   |   |                      |   |                                 |   |                    |
| 1   | Yes                                                                                                                                                                                                                                     |                                                                                                           |                                                                                                                                                                                                                                                                                                  |   |                          |   |                      |   |                      |   |                                 |   |                    |
| 0   | No                                                                                                                                                                                                                                      |                                                                                                           |                                                                                                                                                                                                                                                                                                  |   |                          |   |                      |   |                      |   |                                 |   |                    |
| 100 | <p><b>school_missing_details</b></p> <p>Show the field ONLY if:<br/>[covid] = '1' and [functional_available] = '1' and [coviddiagnosis_age] = '2' and [school_missing_evidence] = '1'</p>                                               | Enter any additional details available about school missingness (frequency, timing after infection, etc): | notes, Required                                                                                                                                                                                                                                                                                  |   |                          |   |                      |   |                      |   |                                 |   |                    |
| 101 | <p><b>modified_school</b></p> <p>Show the field ONLY if:<br/>[covid] = '1' and [functional_available] = '1' and [coviddiagnosis_age] = '2'</p>                                                                                          | Has the patient transitioned to a modified school program?                                                | <p>radio, Required</p> <table border="1"> <tr> <td>1</td> <td>Yes- home schooling</td> </tr> <tr> <td>2</td> <td>Yes- Virtual school</td> </tr> <tr> <td>3</td> <td>Yes- hybrid schedule</td> </tr> <tr> <td>4</td> <td>No</td> </tr> <tr> <td>5</td> <td>Unsure/Unavailable</td> </tr> </table> | 1 | Yes- home schooling      | 2 | Yes- Virtual school  | 3 | Yes- hybrid schedule | 4 | No                              | 5 | Unsure/Unavailable |
| 1   | Yes- home schooling                                                                                                                                                                                                                     |                                                                                                           |                                                                                                                                                                                                                                                                                                  |   |                          |   |                      |   |                      |   |                                 |   |                    |
| 2   | Yes- Virtual school                                                                                                                                                                                                                     |                                                                                                           |                                                                                                                                                                                                                                                                                                  |   |                          |   |                      |   |                      |   |                                 |   |                    |
| 3   | Yes- hybrid schedule                                                                                                                                                                                                                    |                                                                                                           |                                                                                                                                                                                                                                                                                                  |   |                          |   |                      |   |                      |   |                                 |   |                    |
| 4   | No                                                                                                                                                                                                                                      |                                                                                                           |                                                                                                                                                                                                                                                                                                  |   |                          |   |                      |   |                      |   |                                 |   |                    |
| 5   | Unsure/Unavailable                                                                                                                                                                                                                      |                                                                                                           |                                                                                                                                                                                                                                                                                                  |   |                          |   |                      |   |                      |   |                                 |   |                    |
| 102 | <p><b>modified_school_reason</b></p> <p>Show the field ONLY if:<br/>[covid] = '1' and [functional_available] = '1' and [coviddiagnosis_age] = '2' and [modified_school] = '1' or [modified_school] = '2' or [modified_school] = '3'</p> | Is there an indication as to why the patient transitioned to a modified school system?                    | <p>radio, Required</p> <table border="1"> <tr> <td>1</td> <td>Yes- parental preference</td> </tr> <tr> <td>2</td> <td>Yes- school mandated</td> </tr> <tr> <td>3</td> <td>Other</td> </tr> <tr> <td>4</td> <td>Unsure/No Information available</td> </tr> </table>                               | 1 | Yes- parental preference | 2 | Yes- school mandated | 3 | Other                | 4 | Unsure/No Information available |   |                    |
| 1   | Yes- parental preference                                                                                                                                                                                                                |                                                                                                           |                                                                                                                                                                                                                                                                                                  |   |                          |   |                      |   |                      |   |                                 |   |                    |
| 2   | Yes- school mandated                                                                                                                                                                                                                    |                                                                                                           |                                                                                                                                                                                                                                                                                                  |   |                          |   |                      |   |                      |   |                                 |   |                    |
| 3   | Other                                                                                                                                                                                                                                   |                                                                                                           |                                                                                                                                                                                                                                                                                                  |   |                          |   |                      |   |                      |   |                                 |   |                    |
| 4   | Unsure/No Information available                                                                                                                                                                                                         |                                                                                                           |                                                                                                                                                                                                                                                                                                  |   |                          |   |                      |   |                      |   |                                 |   |                    |
| 103 | <p><b>modified_school_return</b></p> <p>Show the field ONLY if:<br/>[covid] = '1' and [functional_available] = '1' and [coviddiagnosis_age] = '2' and [modified_school] = '1' or [modified_school] = '2' or [modified_schoo</p>         | Has the patient returned to full in person learning?                                                      | <p>radio, Required</p> <table border="1"> <tr> <td>1</td> <td>Yes</td> </tr> <tr> <td>2</td> <td>No</td> </tr> <tr> <td>3</td> <td>Unsure/Unavailable</td> </tr> </table>                                                                                                                        | 1 | Yes                      | 2 | No                   | 3 | Unsure/Unavailable   |   |                                 |   |                    |
| 1   | Yes                                                                                                                                                                                                                                     |                                                                                                           |                                                                                                                                                                                                                                                                                                  |   |                          |   |                      |   |                      |   |                                 |   |                    |
| 2   | No                                                                                                                                                                                                                                      |                                                                                                           |                                                                                                                                                                                                                                                                                                  |   |                          |   |                      |   |                      |   |                                 |   |                    |
| 3   | Unsure/Unavailable                                                                                                                                                                                                                      |                                                                                                           |                                                                                                                                                                                                                                                                                                  |   |                          |   |                      |   |                      |   |                                 |   |                    |

|     |                                                                                                                                                                                        |                                                                                                                              |                                                                                                                                                                                                                                                                                                                                                                                                                                                                                                                                                                                                                                                                                                                                                         |   |                                                                 |                                                                                   |                                                                               |                   |                                                                   |   |                      |                      |                      |                   |                            |   |                   |                                                     |   |                   |                   |   |                   |                    |
|-----|----------------------------------------------------------------------------------------------------------------------------------------------------------------------------------------|------------------------------------------------------------------------------------------------------------------------------|---------------------------------------------------------------------------------------------------------------------------------------------------------------------------------------------------------------------------------------------------------------------------------------------------------------------------------------------------------------------------------------------------------------------------------------------------------------------------------------------------------------------------------------------------------------------------------------------------------------------------------------------------------------------------------------------------------------------------------------------------------|---|-----------------------------------------------------------------|-----------------------------------------------------------------------------------|-------------------------------------------------------------------------------|-------------------|-------------------------------------------------------------------|---|----------------------|----------------------|----------------------|-------------------|----------------------------|---|-------------------|-----------------------------------------------------|---|-------------------|-------------------|---|-------------------|--------------------|
|     | l] = '3'                                                                                                                                                                               |                                                                                                                              |                                                                                                                                                                                                                                                                                                                                                                                                                                                                                                                                                                                                                                                                                                                                                         |   |                                                                 |                                                                                   |                                                                               |                   |                                                                   |   |                      |                      |                      |                   |                            |   |                   |                                                     |   |                   |                   |   |                   |                    |
| 104 | <p><b>school_return_timing</b></p> <p>Show the field ONLY if:<br/>[covid] = '1' and [functional_available] = '1' and [coviddiagnosis_age] = '2' and [modified_school_return] = '1'</p> | How long after COVID-19 infection did the patient return to full in person learning?                                         | <p>radio, Required</p> <table border="1"> <tr><td>1</td><td>Within 2 week</td></tr> <tr><td>2</td><td>Within 1 month</td></tr> <tr><td>3</td><td>Within 3 months</td></tr> <tr><td>4</td><td>More than 3 months</td></tr> <tr><td>5</td><td>Unsure/Not Available</td></tr> </table>                                                                                                                                                                                                                                                                                                                                                                                                                                                                     | 1 | Within 2 week                                                   | 2                                                                                 | Within 1 month                                                                | 3                 | Within 3 months                                                   | 4 | More than 3 months   | 5                    | Unsure/Not Available |                   |                            |   |                   |                                                     |   |                   |                   |   |                   |                    |
| 1   | Within 2 week                                                                                                                                                                          |                                                                                                                              |                                                                                                                                                                                                                                                                                                                                                                                                                                                                                                                                                                                                                                                                                                                                                         |   |                                                                 |                                                                                   |                                                                               |                   |                                                                   |   |                      |                      |                      |                   |                            |   |                   |                                                     |   |                   |                   |   |                   |                    |
| 2   | Within 1 month                                                                                                                                                                         |                                                                                                                              |                                                                                                                                                                                                                                                                                                                                                                                                                                                                                                                                                                                                                                                                                                                                                         |   |                                                                 |                                                                                   |                                                                               |                   |                                                                   |   |                      |                      |                      |                   |                            |   |                   |                                                     |   |                   |                   |   |                   |                    |
| 3   | Within 3 months                                                                                                                                                                        |                                                                                                                              |                                                                                                                                                                                                                                                                                                                                                                                                                                                                                                                                                                                                                                                                                                                                                         |   |                                                                 |                                                                                   |                                                                               |                   |                                                                   |   |                      |                      |                      |                   |                            |   |                   |                                                     |   |                   |                   |   |                   |                    |
| 4   | More than 3 months                                                                                                                                                                     |                                                                                                                              |                                                                                                                                                                                                                                                                                                                                                                                                                                                                                                                                                                                                                                                                                                                                                         |   |                                                                 |                                                                                   |                                                                               |                   |                                                                   |   |                      |                      |                      |                   |                            |   |                   |                                                     |   |                   |                   |   |                   |                    |
| 5   | Unsure/Not Available                                                                                                                                                                   |                                                                                                                              |                                                                                                                                                                                                                                                                                                                                                                                                                                                                                                                                                                                                                                                                                                                                                         |   |                                                                 |                                                                                   |                                                                               |                   |                                                                   |   |                      |                      |                      |                   |                            |   |                   |                                                     |   |                   |                   |   |                   |                    |
| 105 | <p><b>school_testing</b></p> <p>Show the field ONLY if:<br/>[covid] = '1' and [functional_available] = '1' and [coviddiagnosis_age] = '2'</p>                                          | Starting from the period 28 days after initial COVID-19 infection, has the patient:                                          | <p>checkbox, Required</p> <table border="1"> <tr> <td>1</td> <td>school_testing__1</td> <td>Been referred for neuropsychological testing (either through school of otherwise)</td> </tr> <tr> <td>2</td> <td>school_testing__2</td> <td>Requested an individualized education plan (IEP)</td> </tr> <tr> <td>3</td> <td>school_testing__3</td> <td>Requested a 504 plan</td> </tr> <tr> <td>4</td> <td>school_testing__4</td> <td>Requested private tutoring</td> </tr> <tr> <td>5</td> <td>school_testing__5</td> <td>Requested any other assistance with school learning</td> </tr> <tr> <td>6</td> <td>school_testing__6</td> <td>None of the above</td> </tr> <tr> <td>7</td> <td>school_testing__7</td> <td>Unsure/Unavailable</td> </tr> </table> | 1 | school_testing__1                                               | Been referred for neuropsychological testing (either through school of otherwise) | 2                                                                             | school_testing__2 | Requested an individualized education plan (IEP)                  | 3 | school_testing__3    | Requested a 504 plan | 4                    | school_testing__4 | Requested private tutoring | 5 | school_testing__5 | Requested any other assistance with school learning | 6 | school_testing__6 | None of the above | 7 | school_testing__7 | Unsure/Unavailable |
| 1   | school_testing__1                                                                                                                                                                      | Been referred for neuropsychological testing (either through school of otherwise)                                            |                                                                                                                                                                                                                                                                                                                                                                                                                                                                                                                                                                                                                                                                                                                                                         |   |                                                                 |                                                                                   |                                                                               |                   |                                                                   |   |                      |                      |                      |                   |                            |   |                   |                                                     |   |                   |                   |   |                   |                    |
| 2   | school_testing__2                                                                                                                                                                      | Requested an individualized education plan (IEP)                                                                             |                                                                                                                                                                                                                                                                                                                                                                                                                                                                                                                                                                                                                                                                                                                                                         |   |                                                                 |                                                                                   |                                                                               |                   |                                                                   |   |                      |                      |                      |                   |                            |   |                   |                                                     |   |                   |                   |   |                   |                    |
| 3   | school_testing__3                                                                                                                                                                      | Requested a 504 plan                                                                                                         |                                                                                                                                                                                                                                                                                                                                                                                                                                                                                                                                                                                                                                                                                                                                                         |   |                                                                 |                                                                                   |                                                                               |                   |                                                                   |   |                      |                      |                      |                   |                            |   |                   |                                                     |   |                   |                   |   |                   |                    |
| 4   | school_testing__4                                                                                                                                                                      | Requested private tutoring                                                                                                   |                                                                                                                                                                                                                                                                                                                                                                                                                                                                                                                                                                                                                                                                                                                                                         |   |                                                                 |                                                                                   |                                                                               |                   |                                                                   |   |                      |                      |                      |                   |                            |   |                   |                                                     |   |                   |                   |   |                   |                    |
| 5   | school_testing__5                                                                                                                                                                      | Requested any other assistance with school learning                                                                          |                                                                                                                                                                                                                                                                                                                                                                                                                                                                                                                                                                                                                                                                                                                                                         |   |                                                                 |                                                                                   |                                                                               |                   |                                                                   |   |                      |                      |                      |                   |                            |   |                   |                                                     |   |                   |                   |   |                   |                    |
| 6   | school_testing__6                                                                                                                                                                      | None of the above                                                                                                            |                                                                                                                                                                                                                                                                                                                                                                                                                                                                                                                                                                                                                                                                                                                                                         |   |                                                                 |                                                                                   |                                                                               |                   |                                                                   |   |                      |                      |                      |                   |                            |   |                   |                                                     |   |                   |                   |   |                   |                    |
| 7   | school_testing__7                                                                                                                                                                      | Unsure/Unavailable                                                                                                           |                                                                                                                                                                                                                                                                                                                                                                                                                                                                                                                                                                                                                                                                                                                                                         |   |                                                                 |                                                                                   |                                                                               |                   |                                                                   |   |                      |                      |                      |                   |                            |   |                   |                                                     |   |                   |                   |   |                   |                    |
| 106 | <p><b>school_testing_other</b></p> <p>Show the field ONLY if:<br/>[covid] = '1' and [functional_available] = '1' and [coviddiagnosis_age] = '2' and [school_testing(5)] = '1'</p>      | Please describe the other assistance requested:                                                                              | <p>notes, Required</p>                                                                                                                                                                                                                                                                                                                                                                                                                                                                                                                                                                                                                                                                                                                                  |   |                                                                 |                                                                                   |                                                                               |                   |                                                                   |   |                      |                      |                      |                   |                            |   |                   |                                                     |   |                   |                   |   |                   |                    |
| 107 | <p><b>neurotest_new</b></p> <p>Show the field ONLY if:<br/>[covid] = '1' and [functional_available] = '1' and [coviddiagnosis_age] = '2' and [school_testing(1)] = '1'</p>             | Was neuropsychological testing (either through school of otherwise) newly requested 28 days or more post COVID-19 infection? | <p>dropdown, Required</p> <table border="1"> <tr><td>1</td><td>Yes- patient never had this support prior to COVID-19 infection</td></tr> <tr><td>2</td><td>No, but the level of support patient needed increased post COVID-19 infection</td></tr> <tr><td>3</td><td>No, these were in place at the same level of support pre-COVID-19</td></tr> <tr><td>4</td><td>Unsure/Not available</td></tr> </table>                                                                                                                                                                                                                                                                                                                                              | 1 | Yes- patient never had this support prior to COVID-19 infection | 2                                                                                 | No, but the level of support patient needed increased post COVID-19 infection | 3                 | No, these were in place at the same level of support pre-COVID-19 | 4 | Unsure/Not available |                      |                      |                   |                            |   |                   |                                                     |   |                   |                   |   |                   |                    |
| 1   | Yes- patient never had this support prior to COVID-19 infection                                                                                                                        |                                                                                                                              |                                                                                                                                                                                                                                                                                                                                                                                                                                                                                                                                                                                                                                                                                                                                                         |   |                                                                 |                                                                                   |                                                                               |                   |                                                                   |   |                      |                      |                      |                   |                            |   |                   |                                                     |   |                   |                   |   |                   |                    |
| 2   | No, but the level of support patient needed increased post COVID-19 infection                                                                                                          |                                                                                                                              |                                                                                                                                                                                                                                                                                                                                                                                                                                                                                                                                                                                                                                                                                                                                                         |   |                                                                 |                                                                                   |                                                                               |                   |                                                                   |   |                      |                      |                      |                   |                            |   |                   |                                                     |   |                   |                   |   |                   |                    |
| 3   | No, these were in place at the same level of support pre-COVID-19                                                                                                                      |                                                                                                                              |                                                                                                                                                                                                                                                                                                                                                                                                                                                                                                                                                                                                                                                                                                                                                         |   |                                                                 |                                                                                   |                                                                               |                   |                                                                   |   |                      |                      |                      |                   |                            |   |                   |                                                     |   |                   |                   |   |                   |                    |
| 4   | Unsure/Not available                                                                                                                                                                   |                                                                                                                              |                                                                                                                                                                                                                                                                                                                                                                                                                                                                                                                                                                                                                                                                                                                                                         |   |                                                                 |                                                                                   |                                                                               |                   |                                                                   |   |                      |                      |                      |                   |                            |   |                   |                                                     |   |                   |                   |   |                   |                    |
| 108 | <b>iep_new</b>                                                                                                                                                                         | Was an Individualized Education Plan (IEP) newly                                                                             | <p>dropdown, Required</p>                                                                                                                                                                                                                                                                                                                                                                                                                                                                                                                                                                                                                                                                                                                               |   |                                                                 |                                                                                   |                                                                               |                   |                                                                   |   |                      |                      |                      |                   |                            |   |                   |                                                     |   |                   |                   |   |                   |                    |

|     |                                                                                                                                                                                               |                                                                                                             |                                                                                                                                                                                                                                                                                                                                                                                                                        |   |                                                                 |                       |                                                                               |                       |                                                                   |   |                      |
|-----|-----------------------------------------------------------------------------------------------------------------------------------------------------------------------------------------------|-------------------------------------------------------------------------------------------------------------|------------------------------------------------------------------------------------------------------------------------------------------------------------------------------------------------------------------------------------------------------------------------------------------------------------------------------------------------------------------------------------------------------------------------|---|-----------------------------------------------------------------|-----------------------|-------------------------------------------------------------------------------|-----------------------|-------------------------------------------------------------------|---|----------------------|
|     | <p>Show the field ONLY if:<br/>[covid] = '1' and [functional_available] = '1' and [coviddiagnosis_age] = '2' and [school_testing(2)] = '1'</p>                                                | requested 28 days or more post COVID-19 infection?                                                          | <table border="1"> <tr> <td>1</td> <td>Yes- patient never had this support prior to COVID-19 infection</td> </tr> <tr> <td>2</td> <td>No, but the level of support patient needed increased post COVID-19 infection</td> </tr> <tr> <td>3</td> <td>No, these were in place at the same level of support pre-COVID-19</td> </tr> <tr> <td>4</td> <td>Unsure/Not available</td> </tr> </table>                           | 1 | Yes- patient never had this support prior to COVID-19 infection | 2                     | No, but the level of support patient needed increased post COVID-19 infection | 3                     | No, these were in place at the same level of support pre-COVID-19 | 4 | Unsure/Not available |
| 1   | Yes- patient never had this support prior to COVID-19 infection                                                                                                                               |                                                                                                             |                                                                                                                                                                                                                                                                                                                                                                                                                        |   |                                                                 |                       |                                                                               |                       |                                                                   |   |                      |
| 2   | No, but the level of support patient needed increased post COVID-19 infection                                                                                                                 |                                                                                                             |                                                                                                                                                                                                                                                                                                                                                                                                                        |   |                                                                 |                       |                                                                               |                       |                                                                   |   |                      |
| 3   | No, these were in place at the same level of support pre-COVID-19                                                                                                                             |                                                                                                             |                                                                                                                                                                                                                                                                                                                                                                                                                        |   |                                                                 |                       |                                                                               |                       |                                                                   |   |                      |
| 4   | Unsure/Not available                                                                                                                                                                          |                                                                                                             |                                                                                                                                                                                                                                                                                                                                                                                                                        |   |                                                                 |                       |                                                                               |                       |                                                                   |   |                      |
| 109 | <p><b>plan_new</b></p> <p>Show the field ONLY if:<br/>[covid] = '1' and [functional_available] = '1' and [coviddiagnosis_age] = '2' and [school_testing(3)] = '1'</p>                         | Was a 504 plan newly requested 28 days or more post COVID-19 infection?                                     | <p>dropdown, Required</p> <table border="1"> <tr> <td>1</td> <td>Yes- patient never had this support prior to COVID-19 infection</td> </tr> <tr> <td>2</td> <td>No, but the level of support patient needed increased post COVID-19 infection</td> </tr> <tr> <td>3</td> <td>No, these were in place at the same level of support pre-COVID-19</td> </tr> <tr> <td>4</td> <td>Unsure/Not available</td> </tr> </table> | 1 | Yes- patient never had this support prior to COVID-19 infection | 2                     | No, but the level of support patient needed increased post COVID-19 infection | 3                     | No, these were in place at the same level of support pre-COVID-19 | 4 | Unsure/Not available |
| 1   | Yes- patient never had this support prior to COVID-19 infection                                                                                                                               |                                                                                                             |                                                                                                                                                                                                                                                                                                                                                                                                                        |   |                                                                 |                       |                                                                               |                       |                                                                   |   |                      |
| 2   | No, but the level of support patient needed increased post COVID-19 infection                                                                                                                 |                                                                                                             |                                                                                                                                                                                                                                                                                                                                                                                                                        |   |                                                                 |                       |                                                                               |                       |                                                                   |   |                      |
| 3   | No, these were in place at the same level of support pre-COVID-19                                                                                                                             |                                                                                                             |                                                                                                                                                                                                                                                                                                                                                                                                                        |   |                                                                 |                       |                                                                               |                       |                                                                   |   |                      |
| 4   | Unsure/Not available                                                                                                                                                                          |                                                                                                             |                                                                                                                                                                                                                                                                                                                                                                                                                        |   |                                                                 |                       |                                                                               |                       |                                                                   |   |                      |
| 110 | <p><b>tutoring_new</b></p> <p>Show the field ONLY if:<br/>[covid] = '1' and [functional_available] = '1' and [coviddiagnosis_age] = '2' and [school_testing(4)] = '1'</p>                     | Was a private tutoring newly requested 28 days or more post COVID-19 infection?                             | <p>dropdown, Required</p> <table border="1"> <tr> <td>1</td> <td>Yes- patient never had this support prior to COVID-19 infection</td> </tr> <tr> <td>2</td> <td>No, but the level of support patient needed increased post COVID-19 infection</td> </tr> <tr> <td>3</td> <td>No, these were in place at the same level of support pre-COVID-19</td> </tr> <tr> <td>4</td> <td>Unsure/Not available</td> </tr> </table> | 1 | Yes- patient never had this support prior to COVID-19 infection | 2                     | No, but the level of support patient needed increased post COVID-19 infection | 3                     | No, these were in place at the same level of support pre-COVID-19 | 4 | Unsure/Not available |
| 1   | Yes- patient never had this support prior to COVID-19 infection                                                                                                                               |                                                                                                             |                                                                                                                                                                                                                                                                                                                                                                                                                        |   |                                                                 |                       |                                                                               |                       |                                                                   |   |                      |
| 2   | No, but the level of support patient needed increased post COVID-19 infection                                                                                                                 |                                                                                                             |                                                                                                                                                                                                                                                                                                                                                                                                                        |   |                                                                 |                       |                                                                               |                       |                                                                   |   |                      |
| 3   | No, these were in place at the same level of support pre-COVID-19                                                                                                                             |                                                                                                             |                                                                                                                                                                                                                                                                                                                                                                                                                        |   |                                                                 |                       |                                                                               |                       |                                                                   |   |                      |
| 4   | Unsure/Not available                                                                                                                                                                          |                                                                                                             |                                                                                                                                                                                                                                                                                                                                                                                                                        |   |                                                                 |                       |                                                                               |                       |                                                                   |   |                      |
| 111 | <p><b>school_reported_difficult</b></p> <p>Show the field ONLY if:<br/>[covid] = '1' and [functional_available] = '1' and [coviddiagnosis_age] = '2'</p>                                      | Has the patient or parent reported difficulties in school following COVID-19 infection?                     | <p>yesno, Required</p> <table border="1"> <tr> <td>1</td> <td>Yes</td> </tr> <tr> <td>0</td> <td>No</td> </tr> </table>                                                                                                                                                                                                                                                                                                | 1 | Yes                                                             | 0                     | No                                                                            |                       |                                                                   |   |                      |
| 1   | Yes                                                                                                                                                                                           |                                                                                                             |                                                                                                                                                                                                                                                                                                                                                                                                                        |   |                                                                 |                       |                                                                               |                       |                                                                   |   |                      |
| 0   | No                                                                                                                                                                                            |                                                                                                             |                                                                                                                                                                                                                                                                                                                                                                                                                        |   |                                                                 |                       |                                                                               |                       |                                                                   |   |                      |
| 112 | <p><b>school_reported_describe</b></p> <p>Show the field ONLY if:<br/>[covid] = '1' and [functional_available] = '1' and [coviddiagnosis_age] = '2' and [school_reported_difficult] = '1'</p> | Please describe the difficulties reported:                                                                  | notes, Required                                                                                                                                                                                                                                                                                                                                                                                                        |   |                                                                 |                       |                                                                               |                       |                                                                   |   |                      |
| 113 | <p><b>therapy_schoolkids</b></p> <p>Show the field ONLY if:<br/>[covid] = '1' and [functional_available] = '1' and [coviddiagnosis_age] = '2'</p>                                             | Has the patient required any of the following in the period starting 28 days after initial COVID infection: | <p>checkbox, Required</p> <table border="1"> <tr> <td>1</td> <td>therapy_schoolkids__1</td> <td>Physical therapy (PT)</td> </tr> <tr> <td>2</td> <td>therapy_schoolkids__2</td> <td>Occupational therapy (OT)</td> </tr> </table>                                                                                                                                                                                      | 1 | therapy_schoolkids__1                                           | Physical therapy (PT) | 2                                                                             | therapy_schoolkids__2 | Occupational therapy (OT)                                         |   |                      |
| 1   | therapy_schoolkids__1                                                                                                                                                                         | Physical therapy (PT)                                                                                       |                                                                                                                                                                                                                                                                                                                                                                                                                        |   |                                                                 |                       |                                                                               |                       |                                                                   |   |                      |
| 2   | therapy_schoolkids__2                                                                                                                                                                         | Occupational therapy (OT)                                                                                   |                                                                                                                                                                                                                                                                                                                                                                                                                        |   |                                                                 |                       |                                                                               |                       |                                                                   |   |                      |

|     |                                                                                                                                                                                                                                                           |                                                                               |                                                                                                                                                                                                                                                                                                                                                                                                                 |   |                                                                 |                               |                                                                               |                       |                                                                   |   |                       |      |
|-----|-----------------------------------------------------------------------------------------------------------------------------------------------------------------------------------------------------------------------------------------------------------|-------------------------------------------------------------------------------|-----------------------------------------------------------------------------------------------------------------------------------------------------------------------------------------------------------------------------------------------------------------------------------------------------------------------------------------------------------------------------------------------------------------|---|-----------------------------------------------------------------|-------------------------------|-------------------------------------------------------------------------------|-----------------------|-------------------------------------------------------------------|---|-----------------------|------|
|     |                                                                                                                                                                                                                                                           |                                                                               | <table border="1"> <tr> <td>3</td> <td>therapy_schoolkids__3</td> <td>Speech language therapy (SLP)</td> </tr> <tr> <td>4</td> <td>therapy_schoolkids__4</td> <td>Other</td> </tr> <tr> <td>5</td> <td>therapy_schoolkids__5</td> <td>None</td> </tr> </table>                                                                                                                                                  | 3 | therapy_schoolkids__3                                           | Speech language therapy (SLP) | 4                                                                             | therapy_schoolkids__4 | Other                                                             | 5 | therapy_schoolkids__5 | None |
| 3   | therapy_schoolkids__3                                                                                                                                                                                                                                     | Speech language therapy (SLP)                                                 |                                                                                                                                                                                                                                                                                                                                                                                                                 |   |                                                                 |                               |                                                                               |                       |                                                                   |   |                       |      |
| 4   | therapy_schoolkids__4                                                                                                                                                                                                                                     | Other                                                                         |                                                                                                                                                                                                                                                                                                                                                                                                                 |   |                                                                 |                               |                                                                               |                       |                                                                   |   |                       |      |
| 5   | therapy_schoolkids__5                                                                                                                                                                                                                                     | None                                                                          |                                                                                                                                                                                                                                                                                                                                                                                                                 |   |                                                                 |                               |                                                                               |                       |                                                                   |   |                       |      |
| 114 | <p><b>other_therapy_schoolkids</b></p> <p>Show the field ONLY if: [therapy_schoolkids(4)] = '1'</p>                                                                                                                                                       | Please describe Other:                                                        | notes, Required                                                                                                                                                                                                                                                                                                                                                                                                 |   |                                                                 |                               |                                                                               |                       |                                                                   |   |                       |      |
| 115 | <p><b>physical_therapy_new</b></p> <p>Show the field ONLY if: [covid] = '1' and [functional_available] = '1' and [coviddiagnosis_age] = '2' and [therapy_schoolkids(1)] = '1'</p>                                                                         | Was Physical Therapy newly requested 28 days or more post COVID-19 infection? | dropdown, Required <table border="1"> <tr> <td>1</td> <td>Yes- patient never had this support prior to COVID-19 infection</td> </tr> <tr> <td>2</td> <td>No, but the level of support patient needed increased post COVID-19 infection</td> </tr> <tr> <td>3</td> <td>No, these were in place at the same level of support pre-COVID-19</td> </tr> <tr> <td>4</td> <td>Unsure/Not available</td> </tr> </table> | 1 | Yes- patient never had this support prior to COVID-19 infection | 2                             | No, but the level of support patient needed increased post COVID-19 infection | 3                     | No, these were in place at the same level of support pre-COVID-19 | 4 | Unsure/Not available  |      |
| 1   | Yes- patient never had this support prior to COVID-19 infection                                                                                                                                                                                           |                                                                               |                                                                                                                                                                                                                                                                                                                                                                                                                 |   |                                                                 |                               |                                                                               |                       |                                                                   |   |                       |      |
| 2   | No, but the level of support patient needed increased post COVID-19 infection                                                                                                                                                                             |                                                                               |                                                                                                                                                                                                                                                                                                                                                                                                                 |   |                                                                 |                               |                                                                               |                       |                                                                   |   |                       |      |
| 3   | No, these were in place at the same level of support pre-COVID-19                                                                                                                                                                                         |                                                                               |                                                                                                                                                                                                                                                                                                                                                                                                                 |   |                                                                 |                               |                                                                               |                       |                                                                   |   |                       |      |
| 4   | Unsure/Not available                                                                                                                                                                                                                                      |                                                                               |                                                                                                                                                                                                                                                                                                                                                                                                                 |   |                                                                 |                               |                                                                               |                       |                                                                   |   |                       |      |
| 116 | <p><b>physical_therapy_new_date</b></p> <p>Show the field ONLY if: [covid] = '1' and [functional_available] = '1' and [coviddiagnosis_age] = '2' and [therapy_schoolkids(1)] = '1' and [physical_therapy_new] = '1' or [physical_therapy_new] = '2'</p>   | Enter date Physical Therapy began or increased post COVID-19 infection.       | text (date_mdy), Required<br>Field Annotation: @HIDEBUTTON                                                                                                                                                                                                                                                                                                                                                      |   |                                                                 |                               |                                                                               |                       |                                                                   |   |                       |      |
| 117 | <p><b>physical_therapy_new_status</b></p> <p>Show the field ONLY if: [covid] = '1' and [functional_available] = '1' and [coviddiagnosis_age] = '2' and [therapy_schoolkids(1)] = '1' and [physical_therapy_new] = '1' or [physical_therapy_new] = '2'</p> | Enter current status of Physical Therapy treatment.                           | radio, Required <table border="1"> <tr> <td>1</td> <td>Ongoing</td> </tr> <tr> <td>2</td> <td>Completed</td> </tr> <tr> <td>3</td> <td>Unsure/Unavailable</td> </tr> </table> Field Annotation: @HIDEBUTTON                                                                                                                                                                                                     | 1 | Ongoing                                                         | 2                             | Completed                                                                     | 3                     | Unsure/Unavailable                                                |   |                       |      |
| 1   | Ongoing                                                                                                                                                                                                                                                   |                                                                               |                                                                                                                                                                                                                                                                                                                                                                                                                 |   |                                                                 |                               |                                                                               |                       |                                                                   |   |                       |      |
| 2   | Completed                                                                                                                                                                                                                                                 |                                                                               |                                                                                                                                                                                                                                                                                                                                                                                                                 |   |                                                                 |                               |                                                                               |                       |                                                                   |   |                       |      |
| 3   | Unsure/Unavailable                                                                                                                                                                                                                                        |                                                                               |                                                                                                                                                                                                                                                                                                                                                                                                                 |   |                                                                 |                               |                                                                               |                       |                                                                   |   |                       |      |
| 118 | <p><b>physical_therapy_lastdate</b></p> <p>Show the field ONLY if: [covid] = '1' and [functional_available] = '1' and [coviddiagnosis_age] = '2' and [therapy_schoolkids(</p>                                                                             | Enter date of last Physical Therapy treatment.                                | text (date_mdy), Required<br>Field Annotation: @HIDEBUTTON                                                                                                                                                                                                                                                                                                                                                      |   |                                                                 |                               |                                                                               |                       |                                                                   |   |                       |      |

|     |                                                                                                                                                                                                                                                                           |                                                                                      |                                                                                                                                                                                                                                                                                                                                                                                                                        |   |                                                                 |   |                                                                               |   |                                                                   |   |                      |
|-----|---------------------------------------------------------------------------------------------------------------------------------------------------------------------------------------------------------------------------------------------------------------------------|--------------------------------------------------------------------------------------|------------------------------------------------------------------------------------------------------------------------------------------------------------------------------------------------------------------------------------------------------------------------------------------------------------------------------------------------------------------------------------------------------------------------|---|-----------------------------------------------------------------|---|-------------------------------------------------------------------------------|---|-------------------------------------------------------------------|---|----------------------|
|     | 1)) = '1' and [physical_therapy_new] = '1' or [physical_therapy_new] = '2' and [physical_therapy_new_status] = '2'                                                                                                                                                        |                                                                                      |                                                                                                                                                                                                                                                                                                                                                                                                                        |   |                                                                 |   |                                                                               |   |                                                                   |   |                      |
| 119 | <p><b>occupational_therapy_new</b></p> <p>Show the field ONLY if:<br/>[covid] = '1' and [functional_available] = '1' and [coviddiagnosis_age] = '2' and [therapy_schoolkids(2)] = '1'</p>                                                                                 | Was Occupational Therapy newly requested 28 days or more post COVID-19 infection?    | <p>dropdown, Required</p> <table border="1"> <tr> <td>1</td> <td>Yes- patient never had this support prior to COVID-19 infection</td> </tr> <tr> <td>2</td> <td>No, but the level of support patient needed increased post COVID-19 infection</td> </tr> <tr> <td>3</td> <td>No, these were in place at the same level of support pre-COVID-19</td> </tr> <tr> <td>4</td> <td>Unsure/Not available</td> </tr> </table> | 1 | Yes- patient never had this support prior to COVID-19 infection | 2 | No, but the level of support patient needed increased post COVID-19 infection | 3 | No, these were in place at the same level of support pre-COVID-19 | 4 | Unsure/Not available |
| 1   | Yes- patient never had this support prior to COVID-19 infection                                                                                                                                                                                                           |                                                                                      |                                                                                                                                                                                                                                                                                                                                                                                                                        |   |                                                                 |   |                                                                               |   |                                                                   |   |                      |
| 2   | No, but the level of support patient needed increased post COVID-19 infection                                                                                                                                                                                             |                                                                                      |                                                                                                                                                                                                                                                                                                                                                                                                                        |   |                                                                 |   |                                                                               |   |                                                                   |   |                      |
| 3   | No, these were in place at the same level of support pre-COVID-19                                                                                                                                                                                                         |                                                                                      |                                                                                                                                                                                                                                                                                                                                                                                                                        |   |                                                                 |   |                                                                               |   |                                                                   |   |                      |
| 4   | Unsure/Not available                                                                                                                                                                                                                                                      |                                                                                      |                                                                                                                                                                                                                                                                                                                                                                                                                        |   |                                                                 |   |                                                                               |   |                                                                   |   |                      |
| 120 | <p><b>occupational_therapy_new_date</b></p> <p>Show the field ONLY if:<br/>[covid] = '1' and [functional_available] = '1' and [coviddiagnosis_age] = '2' and [therapy_schoolkids(2)] = '1' and [occupational_therapy_new] = '1' or [occupational_therapy_new] = '2'</p>   | Enter date Occupational Therapy began or increased post COVID-19 infection.          | <p>text (date_mdy), Required</p> <p>Field Annotation: @HIDEBUTTON</p>                                                                                                                                                                                                                                                                                                                                                  |   |                                                                 |   |                                                                               |   |                                                                   |   |                      |
| 121 | <p><b>occupational_therapy_new_status</b></p> <p>Show the field ONLY if:<br/>[covid] = '1' and [functional_available] = '1' and [coviddiagnosis_age] = '2' and [therapy_schoolkids(2)] = '1' and [occupational_therapy_new] = '1' or [occupational_therapy_new] = '2'</p> | Enter current status of Occupational Therapy treatment.                              | <p>radio, Required</p> <table border="1"> <tr> <td>1</td> <td>Ongoing</td> </tr> <tr> <td>2</td> <td>Completed</td> </tr> <tr> <td>3</td> <td>Unsure/Unavailable</td> </tr> </table> <p>Field Annotation: @HIDEBUTTON</p>                                                                                                                                                                                              | 1 | Ongoing                                                         | 2 | Completed                                                                     | 3 | Unsure/Unavailable                                                |   |                      |
| 1   | Ongoing                                                                                                                                                                                                                                                                   |                                                                                      |                                                                                                                                                                                                                                                                                                                                                                                                                        |   |                                                                 |   |                                                                               |   |                                                                   |   |                      |
| 2   | Completed                                                                                                                                                                                                                                                                 |                                                                                      |                                                                                                                                                                                                                                                                                                                                                                                                                        |   |                                                                 |   |                                                                               |   |                                                                   |   |                      |
| 3   | Unsure/Unavailable                                                                                                                                                                                                                                                        |                                                                                      |                                                                                                                                                                                                                                                                                                                                                                                                                        |   |                                                                 |   |                                                                               |   |                                                                   |   |                      |
| 122 | <p><b>occupational_therapy_last_date</b></p> <p>Show the field ONLY if:<br/>[covid] = '1' and [functional_available] = '1' and [coviddiagnosis_age] = '2' and [therapy_schoolkids(2)] = '1' and [occupational_therapy_new_status] = '2'</p>                               | Enter date of last Occupational Therapy treatment.                                   | <p>text (date_mdy), Required</p> <p>Field Annotation: @HIDEBUTTON</p>                                                                                                                                                                                                                                                                                                                                                  |   |                                                                 |   |                                                                               |   |                                                                   |   |                      |
| 123 | <p><b>speech_therapy_new</b></p> <p>Show the field ONLY if:</p>                                                                                                                                                                                                           | Was Speech Language Therapy newly requested 28 days or more post COVID-19 infection? | <p>dropdown, Required</p> <table border="1"> <tr> <td>1</td> <td>Yes- patient never had this support</td> </tr> </table>                                                                                                                                                                                                                                                                                               | 1 | Yes- patient never had this support                             |   |                                                                               |   |                                                                   |   |                      |
| 1   | Yes- patient never had this support                                                                                                                                                                                                                                       |                                                                                      |                                                                                                                                                                                                                                                                                                                                                                                                                        |   |                                                                 |   |                                                                               |   |                                                                   |   |                      |

|     |                                                                                                                                                                                                                                                         |                                                                                                                                                                                                                                                                                                   |                                                                                                                                                                                                                                                                                                                                                                                                                                                                                                                                                                                                                                           |   |                             |                                          |           |                                                                               |                          |   |                                                                   |                                       |   |                          |                                        |   |                          |            |   |                          |                     |
|-----|---------------------------------------------------------------------------------------------------------------------------------------------------------------------------------------------------------------------------------------------------------|---------------------------------------------------------------------------------------------------------------------------------------------------------------------------------------------------------------------------------------------------------------------------------------------------|-------------------------------------------------------------------------------------------------------------------------------------------------------------------------------------------------------------------------------------------------------------------------------------------------------------------------------------------------------------------------------------------------------------------------------------------------------------------------------------------------------------------------------------------------------------------------------------------------------------------------------------------|---|-----------------------------|------------------------------------------|-----------|-------------------------------------------------------------------------------|--------------------------|---|-------------------------------------------------------------------|---------------------------------------|---|--------------------------|----------------------------------------|---|--------------------------|------------|---|--------------------------|---------------------|
|     | <p>[covid] = '1' and [functional_available] = '1' and [coviddiagnosis_age] = '2' and [therapy_schoolkids(3)] = '1'</p>                                                                                                                                  |                                                                                                                                                                                                                                                                                                   | <table border="1"> <tr> <td></td> <td colspan="2">prior to COVID-19 infection</td> </tr> <tr> <td>2</td> <td colspan="2">No, but the level of support patient needed increased post COVID-19 infection</td> </tr> <tr> <td>3</td> <td colspan="2">No, these were in place at the same level of support pre-COVID-19</td> </tr> <tr> <td>4</td> <td colspan="2">Unsure/Not available</td> </tr> </table>                                                                                                                                                                                                                                   |   | prior to COVID-19 infection |                                          | 2         | No, but the level of support patient needed increased post COVID-19 infection |                          | 3 | No, these were in place at the same level of support pre-COVID-19 |                                       | 4 | Unsure/Not available     |                                        |   |                          |            |   |                          |                     |
|     | prior to COVID-19 infection                                                                                                                                                                                                                             |                                                                                                                                                                                                                                                                                                   |                                                                                                                                                                                                                                                                                                                                                                                                                                                                                                                                                                                                                                           |   |                             |                                          |           |                                                                               |                          |   |                                                                   |                                       |   |                          |                                        |   |                          |            |   |                          |                     |
| 2   | No, but the level of support patient needed increased post COVID-19 infection                                                                                                                                                                           |                                                                                                                                                                                                                                                                                                   |                                                                                                                                                                                                                                                                                                                                                                                                                                                                                                                                                                                                                                           |   |                             |                                          |           |                                                                               |                          |   |                                                                   |                                       |   |                          |                                        |   |                          |            |   |                          |                     |
| 3   | No, these were in place at the same level of support pre-COVID-19                                                                                                                                                                                       |                                                                                                                                                                                                                                                                                                   |                                                                                                                                                                                                                                                                                                                                                                                                                                                                                                                                                                                                                                           |   |                             |                                          |           |                                                                               |                          |   |                                                                   |                                       |   |                          |                                        |   |                          |            |   |                          |                     |
| 4   | Unsure/Not available                                                                                                                                                                                                                                    |                                                                                                                                                                                                                                                                                                   |                                                                                                                                                                                                                                                                                                                                                                                                                                                                                                                                                                                                                                           |   |                             |                                          |           |                                                                               |                          |   |                                                                   |                                       |   |                          |                                        |   |                          |            |   |                          |                     |
| 124 | <p><b>speech_therapy_new_date</b></p> <p>Show the field ONLY if:<br/>[covid] = '1' and [functional_available] = '1' and [coviddiagnosis_age] = '2' and [therapy_schoolkids(3)] = '1' and [speech_therapy_new] = '1' or [speech_therapy_new] = '2'</p>   | <p>Enter date Speech Language Therapy began or increased post COVID-19 infection.</p>                                                                                                                                                                                                             | <p>text (date_mdy), Required<br/>Field Annotation: @HIDEBUTTON</p>                                                                                                                                                                                                                                                                                                                                                                                                                                                                                                                                                                        |   |                             |                                          |           |                                                                               |                          |   |                                                                   |                                       |   |                          |                                        |   |                          |            |   |                          |                     |
| 125 | <p><b>speech_therapy_new_status</b></p> <p>Show the field ONLY if:<br/>[covid] = '1' and [functional_available] = '1' and [coviddiagnosis_age] = '2' and [therapy_schoolkids(3)] = '1' and [speech_therapy_new] = '1' or [speech_therapy_new] = '2'</p> | <p>Enter current status of Speech Language Therapy treatment.</p>                                                                                                                                                                                                                                 | <p>radio, Required</p> <table border="1"> <tr> <td>1</td> <td>Ongoing</td> </tr> <tr> <td>2</td> <td>Completed</td> </tr> <tr> <td>3</td> <td>Unsure/Unavailable</td> </tr> </table> <p>Field Annotation: @HIDEBUTTON</p>                                                                                                                                                                                                                                                                                                                                                                                                                 | 1 | Ongoing                     | 2                                        | Completed | 3                                                                             | Unsure/Unavailable       |   |                                                                   |                                       |   |                          |                                        |   |                          |            |   |                          |                     |
| 1   | Ongoing                                                                                                                                                                                                                                                 |                                                                                                                                                                                                                                                                                                   |                                                                                                                                                                                                                                                                                                                                                                                                                                                                                                                                                                                                                                           |   |                             |                                          |           |                                                                               |                          |   |                                                                   |                                       |   |                          |                                        |   |                          |            |   |                          |                     |
| 2   | Completed                                                                                                                                                                                                                                               |                                                                                                                                                                                                                                                                                                   |                                                                                                                                                                                                                                                                                                                                                                                                                                                                                                                                                                                                                                           |   |                             |                                          |           |                                                                               |                          |   |                                                                   |                                       |   |                          |                                        |   |                          |            |   |                          |                     |
| 3   | Unsure/Unavailable                                                                                                                                                                                                                                      |                                                                                                                                                                                                                                                                                                   |                                                                                                                                                                                                                                                                                                                                                                                                                                                                                                                                                                                                                                           |   |                             |                                          |           |                                                                               |                          |   |                                                                   |                                       |   |                          |                                        |   |                          |            |   |                          |                     |
| 126 | <p><b>speech_therapy_last_date_schoolkids</b></p> <p>Show the field ONLY if:<br/>[covid] = '1' and [functional_available] = '1' and [coviddiagnosis_age] = '2' and [therapy_schoolkids(3)] = '1' and [speech_therapy_new_status] = '2'</p>              | <p>Enter date of last Speech Language Therapy treatment.</p>                                                                                                                                                                                                                                      | <p>text (date_mdy), Required<br/>Field Annotation: @HIDEBUTTON</p>                                                                                                                                                                                                                                                                                                                                                                                                                                                                                                                                                                        |   |                             |                                          |           |                                                                               |                          |   |                                                                   |                                       |   |                          |                                        |   |                          |            |   |                          |                     |
| 127 | <p><b>mental_health_history</b></p> <p>Show the field ONLY if:<br/>[covid] = '1'</p>                                                                                                                                                                    | <p>Section Header: <i>Section 6. Mental Health History</i></p> <p>Does the patient have a history BEFORE their index date of diagnoses or care for mental health, psychological, or behavioral health conditions? If Yes, please indicate which category of condition (select all that apply)</p> | <p>checkbox, Required</p> <table border="1"> <tr> <td>1</td> <td>mental_health_history__1</td> <td>Attention deficit/hyperactivity disorder</td> </tr> <tr> <td>2</td> <td>mental_health_history__2</td> <td>Autism spectrum disorder</td> </tr> <tr> <td>3</td> <td>mental_health_history__3</td> <td>Intellectual/developmental disability</td> </tr> <tr> <td>4</td> <td>mental_health_history__4</td> <td>Anxiety (includes repetitive disorder)</td> </tr> <tr> <td>5</td> <td>mental_health_history__5</td> <td>Depression</td> </tr> <tr> <td>6</td> <td>mental_health_history__6</td> <td>Other mood disorder</td> </tr> </table> | 1 | mental_health_history__1    | Attention deficit/hyperactivity disorder | 2         | mental_health_history__2                                                      | Autism spectrum disorder | 3 | mental_health_history__3                                          | Intellectual/developmental disability | 4 | mental_health_history__4 | Anxiety (includes repetitive disorder) | 5 | mental_health_history__5 | Depression | 6 | mental_health_history__6 | Other mood disorder |
| 1   | mental_health_history__1                                                                                                                                                                                                                                | Attention deficit/hyperactivity disorder                                                                                                                                                                                                                                                          |                                                                                                                                                                                                                                                                                                                                                                                                                                                                                                                                                                                                                                           |   |                             |                                          |           |                                                                               |                          |   |                                                                   |                                       |   |                          |                                        |   |                          |            |   |                          |                     |
| 2   | mental_health_history__2                                                                                                                                                                                                                                | Autism spectrum disorder                                                                                                                                                                                                                                                                          |                                                                                                                                                                                                                                                                                                                                                                                                                                                                                                                                                                                                                                           |   |                             |                                          |           |                                                                               |                          |   |                                                                   |                                       |   |                          |                                        |   |                          |            |   |                          |                     |
| 3   | mental_health_history__3                                                                                                                                                                                                                                | Intellectual/developmental disability                                                                                                                                                                                                                                                             |                                                                                                                                                                                                                                                                                                                                                                                                                                                                                                                                                                                                                                           |   |                             |                                          |           |                                                                               |                          |   |                                                                   |                                       |   |                          |                                        |   |                          |            |   |                          |                     |
| 4   | mental_health_history__4                                                                                                                                                                                                                                | Anxiety (includes repetitive disorder)                                                                                                                                                                                                                                                            |                                                                                                                                                                                                                                                                                                                                                                                                                                                                                                                                                                                                                                           |   |                             |                                          |           |                                                                               |                          |   |                                                                   |                                       |   |                          |                                        |   |                          |            |   |                          |                     |
| 5   | mental_health_history__5                                                                                                                                                                                                                                | Depression                                                                                                                                                                                                                                                                                        |                                                                                                                                                                                                                                                                                                                                                                                                                                                                                                                                                                                                                                           |   |                             |                                          |           |                                                                               |                          |   |                                                                   |                                       |   |                          |                                        |   |                          |            |   |                          |                     |
| 6   | mental_health_history__6                                                                                                                                                                                                                                | Other mood disorder                                                                                                                                                                                                                                                                               |                                                                                                                                                                                                                                                                                                                                                                                                                                                                                                                                                                                                                                           |   |                             |                                          |           |                                                                               |                          |   |                                                                   |                                       |   |                          |                                        |   |                          |            |   |                          |                     |

|     |                                                                                                                     |                                                                                                                                                                                                                                                                                                                                                                                                                   |                                                                                                                                                                                                                                                                                                                                                                                                                                                                                                                                                                                                                                                                                                                                                                                                                                                                                             |   |                          |                                    |    |                          |                |   |                          |                                                   |   |                          |                                  |   |                          |            |   |                          |                                |   |                          |       |   |                          |                                                   |   |                          |             |
|-----|---------------------------------------------------------------------------------------------------------------------|-------------------------------------------------------------------------------------------------------------------------------------------------------------------------------------------------------------------------------------------------------------------------------------------------------------------------------------------------------------------------------------------------------------------|---------------------------------------------------------------------------------------------------------------------------------------------------------------------------------------------------------------------------------------------------------------------------------------------------------------------------------------------------------------------------------------------------------------------------------------------------------------------------------------------------------------------------------------------------------------------------------------------------------------------------------------------------------------------------------------------------------------------------------------------------------------------------------------------------------------------------------------------------------------------------------------------|---|--------------------------|------------------------------------|----|--------------------------|----------------|---|--------------------------|---------------------------------------------------|---|--------------------------|----------------------------------|---|--------------------------|------------|---|--------------------------|--------------------------------|---|--------------------------|-------|---|--------------------------|---------------------------------------------------|---|--------------------------|-------------|
|     |                                                                                                                     |                                                                                                                                                                                                                                                                                                                                                                                                                   | <table border="1"> <tr> <td></td> <td></td> <td>bipolar, dysthyr</td> </tr> <tr> <td>7</td> <td>mental_health_history__7</td> <td>Other</td> </tr> <tr> <td>9</td> <td>mental_health_history__9</td> <td>No, this patient mental health c before their Ind</td> </tr> <tr> <td>8</td> <td>mental_health_history__8</td> <td>Unavailable</td> </tr> </table>                                                                                                                                                                                                                                                                                                                                                                                                                                                                                                                                 |   |                          | bipolar, dysthyr                   | 7  | mental_health_history__7 | Other          | 9 | mental_health_history__9 | No, this patient mental health c before their Ind | 8 | mental_health_history__8 | Unavailable                      |   |                          |            |   |                          |                                |   |                          |       |   |                          |                                                   |   |                          |             |
|     |                                                                                                                     | bipolar, dysthyr                                                                                                                                                                                                                                                                                                                                                                                                  |                                                                                                                                                                                                                                                                                                                                                                                                                                                                                                                                                                                                                                                                                                                                                                                                                                                                                             |   |                          |                                    |    |                          |                |   |                          |                                                   |   |                          |                                  |   |                          |            |   |                          |                                |   |                          |       |   |                          |                                                   |   |                          |             |
| 7   | mental_health_history__7                                                                                            | Other                                                                                                                                                                                                                                                                                                                                                                                                             |                                                                                                                                                                                                                                                                                                                                                                                                                                                                                                                                                                                                                                                                                                                                                                                                                                                                                             |   |                          |                                    |    |                          |                |   |                          |                                                   |   |                          |                                  |   |                          |            |   |                          |                                |   |                          |       |   |                          |                                                   |   |                          |             |
| 9   | mental_health_history__9                                                                                            | No, this patient mental health c before their Ind                                                                                                                                                                                                                                                                                                                                                                 |                                                                                                                                                                                                                                                                                                                                                                                                                                                                                                                                                                                                                                                                                                                                                                                                                                                                                             |   |                          |                                    |    |                          |                |   |                          |                                                   |   |                          |                                  |   |                          |            |   |                          |                                |   |                          |       |   |                          |                                                   |   |                          |             |
| 8   | mental_health_history__8                                                                                            | Unavailable                                                                                                                                                                                                                                                                                                                                                                                                       |                                                                                                                                                                                                                                                                                                                                                                                                                                                                                                                                                                                                                                                                                                                                                                                                                                                                                             |   |                          |                                    |    |                          |                |   |                          |                                                   |   |                          |                                  |   |                          |            |   |                          |                                |   |                          |       |   |                          |                                                   |   |                          |             |
| 128 | <p><b>mental_health_othe</b><br/><b>r</b></p> <p>Show the field ONLY if:<br/>[mental_health_history(7)] = '1'</p>   | If Other, please provide detail:                                                                                                                                                                                                                                                                                                                                                                                  | notes, Required                                                                                                                                                                                                                                                                                                                                                                                                                                                                                                                                                                                                                                                                                                                                                                                                                                                                             |   |                          |                                    |    |                          |                |   |                          |                                                   |   |                          |                                  |   |                          |            |   |                          |                                |   |                          |       |   |                          |                                                   |   |                          |             |
| 129 | <p><b>mental_health_curre</b><br/><b>nt</b></p> <p>Show the field ONLY if:<br/>[covid] = '1'</p>                    | Does the patient have a history AFTER their index date of diagnoses or care for mental health, psychological, or behavioral health conditions? If Yes, please indicate which category of condition (select all that apply)                                                                                                                                                                                        | <p>checkbox, Required</p> <table border="1"> <tr> <td>1</td> <td>mental_health_current__1</td> <td>Attention deficit/hyperac disorder</td> </tr> <tr> <td>2</td> <td>mental_health_current__2</td> <td>Autism spectru</td> </tr> <tr> <td>3</td> <td>mental_health_current__3</td> <td>Intellectual/dev disability</td> </tr> <tr> <td>4</td> <td>mental_health_current__4</td> <td>Anxiety (includ repetitive disor</td> </tr> <tr> <td>5</td> <td>mental_health_current__5</td> <td>Depression</td> </tr> <tr> <td>6</td> <td>mental_health_current__6</td> <td>Other mood di: bipolar, dysthy</td> </tr> <tr> <td>7</td> <td>mental_health_current__7</td> <td>Other</td> </tr> <tr> <td>9</td> <td>mental_health_current__9</td> <td>No, this patient mental health c after their Inde</td> </tr> <tr> <td>8</td> <td>mental_health_current__8</td> <td>Unavailable</td> </tr> </table> | 1 | mental_health_current__1 | Attention deficit/hyperac disorder | 2  | mental_health_current__2 | Autism spectru | 3 | mental_health_current__3 | Intellectual/dev disability                       | 4 | mental_health_current__4 | Anxiety (includ repetitive disor | 5 | mental_health_current__5 | Depression | 6 | mental_health_current__6 | Other mood di: bipolar, dysthy | 7 | mental_health_current__7 | Other | 9 | mental_health_current__9 | No, this patient mental health c after their Inde | 8 | mental_health_current__8 | Unavailable |
| 1   | mental_health_current__1                                                                                            | Attention deficit/hyperac disorder                                                                                                                                                                                                                                                                                                                                                                                |                                                                                                                                                                                                                                                                                                                                                                                                                                                                                                                                                                                                                                                                                                                                                                                                                                                                                             |   |                          |                                    |    |                          |                |   |                          |                                                   |   |                          |                                  |   |                          |            |   |                          |                                |   |                          |       |   |                          |                                                   |   |                          |             |
| 2   | mental_health_current__2                                                                                            | Autism spectru                                                                                                                                                                                                                                                                                                                                                                                                    |                                                                                                                                                                                                                                                                                                                                                                                                                                                                                                                                                                                                                                                                                                                                                                                                                                                                                             |   |                          |                                    |    |                          |                |   |                          |                                                   |   |                          |                                  |   |                          |            |   |                          |                                |   |                          |       |   |                          |                                                   |   |                          |             |
| 3   | mental_health_current__3                                                                                            | Intellectual/dev disability                                                                                                                                                                                                                                                                                                                                                                                       |                                                                                                                                                                                                                                                                                                                                                                                                                                                                                                                                                                                                                                                                                                                                                                                                                                                                                             |   |                          |                                    |    |                          |                |   |                          |                                                   |   |                          |                                  |   |                          |            |   |                          |                                |   |                          |       |   |                          |                                                   |   |                          |             |
| 4   | mental_health_current__4                                                                                            | Anxiety (includ repetitive disor                                                                                                                                                                                                                                                                                                                                                                                  |                                                                                                                                                                                                                                                                                                                                                                                                                                                                                                                                                                                                                                                                                                                                                                                                                                                                                             |   |                          |                                    |    |                          |                |   |                          |                                                   |   |                          |                                  |   |                          |            |   |                          |                                |   |                          |       |   |                          |                                                   |   |                          |             |
| 5   | mental_health_current__5                                                                                            | Depression                                                                                                                                                                                                                                                                                                                                                                                                        |                                                                                                                                                                                                                                                                                                                                                                                                                                                                                                                                                                                                                                                                                                                                                                                                                                                                                             |   |                          |                                    |    |                          |                |   |                          |                                                   |   |                          |                                  |   |                          |            |   |                          |                                |   |                          |       |   |                          |                                                   |   |                          |             |
| 6   | mental_health_current__6                                                                                            | Other mood di: bipolar, dysthy                                                                                                                                                                                                                                                                                                                                                                                    |                                                                                                                                                                                                                                                                                                                                                                                                                                                                                                                                                                                                                                                                                                                                                                                                                                                                                             |   |                          |                                    |    |                          |                |   |                          |                                                   |   |                          |                                  |   |                          |            |   |                          |                                |   |                          |       |   |                          |                                                   |   |                          |             |
| 7   | mental_health_current__7                                                                                            | Other                                                                                                                                                                                                                                                                                                                                                                                                             |                                                                                                                                                                                                                                                                                                                                                                                                                                                                                                                                                                                                                                                                                                                                                                                                                                                                                             |   |                          |                                    |    |                          |                |   |                          |                                                   |   |                          |                                  |   |                          |            |   |                          |                                |   |                          |       |   |                          |                                                   |   |                          |             |
| 9   | mental_health_current__9                                                                                            | No, this patient mental health c after their Inde                                                                                                                                                                                                                                                                                                                                                                 |                                                                                                                                                                                                                                                                                                                                                                                                                                                                                                                                                                                                                                                                                                                                                                                                                                                                                             |   |                          |                                    |    |                          |                |   |                          |                                                   |   |                          |                                  |   |                          |            |   |                          |                                |   |                          |       |   |                          |                                                   |   |                          |             |
| 8   | mental_health_current__8                                                                                            | Unavailable                                                                                                                                                                                                                                                                                                                                                                                                       |                                                                                                                                                                                                                                                                                                                                                                                                                                                                                                                                                                                                                                                                                                                                                                                                                                                                                             |   |                          |                                    |    |                          |                |   |                          |                                                   |   |                          |                                  |   |                          |            |   |                          |                                |   |                          |       |   |                          |                                                   |   |                          |             |
| 130 | <p><b>mental_health_after</b><br/><b>_2</b></p> <p>Show the field ONLY if:<br/>[mental_health_current(7)] = '1'</p> | If Other, please provide detail:                                                                                                                                                                                                                                                                                                                                                                                  | notes, Required                                                                                                                                                                                                                                                                                                                                                                                                                                                                                                                                                                                                                                                                                                                                                                                                                                                                             |   |                          |                                    |    |                          |                |   |                          |                                                   |   |                          |                                  |   |                          |            |   |                          |                                |   |                          |       |   |                          |                                                   |   |                          |             |
| 131 | <p><b>mental_health_histo</b><br/><b>ry_other</b></p> <p>Show the field ONLY if:<br/>[covid] = '1'</p>              | Does the patient have any other evidence in their medical record of (diagnosed or undiagnosed) mental health, psychological, or behavioral health conditions or problems? This can be assessed by searching the chart for keywords following the guidance in the review manual:For Epic chart search (anxi OR depr OR coping OR confu OR mood OR brain OR concentra OR fatig OR worry OR relationships OR friend) | <p>radio, Required</p> <table border="1"> <tr> <td>1</td> <td>Yes</td> </tr> <tr> <td>2</td> <td>No</td> </tr> <tr> <td>3</td> <td>Unavailable</td> </tr> </table>                                                                                                                                                                                                                                                                                                                                                                                                                                                                                                                                                                                                                                                                                                                          | 1 | Yes                      | 2                                  | No | 3                        | Unavailable    |   |                          |                                                   |   |                          |                                  |   |                          |            |   |                          |                                |   |                          |       |   |                          |                                                   |   |                          |             |
| 1   | Yes                                                                                                                 |                                                                                                                                                                                                                                                                                                                                                                                                                   |                                                                                                                                                                                                                                                                                                                                                                                                                                                                                                                                                                                                                                                                                                                                                                                                                                                                                             |   |                          |                                    |    |                          |                |   |                          |                                                   |   |                          |                                  |   |                          |            |   |                          |                                |   |                          |       |   |                          |                                                   |   |                          |             |
| 2   | No                                                                                                                  |                                                                                                                                                                                                                                                                                                                                                                                                                   |                                                                                                                                                                                                                                                                                                                                                                                                                                                                                                                                                                                                                                                                                                                                                                                                                                                                                             |   |                          |                                    |    |                          |                |   |                          |                                                   |   |                          |                                  |   |                          |            |   |                          |                                |   |                          |       |   |                          |                                                   |   |                          |             |
| 3   | Unavailable                                                                                                         |                                                                                                                                                                                                                                                                                                                                                                                                                   |                                                                                                                                                                                                                                                                                                                                                                                                                                                                                                                                                                                                                                                                                                                                                                                                                                                                                             |   |                          |                                    |    |                          |                |   |                          |                                                   |   |                          |                                  |   |                          |            |   |                          |                                |   |                          |       |   |                          |                                                   |   |                          |             |
| 132 | <p><b>mental_health_other</b><br/><b>_descrip</b></p>                                                               | If yes, please describe briefly. You may copy and paste phrases from clinical notes in the record, but be certain that you do not include any identifying                                                                                                                                                                                                                                                         | notes, Required                                                                                                                                                                                                                                                                                                                                                                                                                                                                                                                                                                                                                                                                                                                                                                                                                                                                             |   |                          |                                    |    |                          |                |   |                          |                                                   |   |                          |                                  |   |                          |            |   |                          |                                |   |                          |       |   |                          |                                                   |   |                          |             |

|     |                                                                                                 |                                                                                                                                                               |                                                                                                                     |   |     |   |    |
|-----|-------------------------------------------------------------------------------------------------|---------------------------------------------------------------------------------------------------------------------------------------------------------------|---------------------------------------------------------------------------------------------------------------------|---|-----|---|----|
|     | Show the field ONLY if: [mental_health_history_other]= '1'                                      | information or any phrases from psychotherapy records.                                                                                                        |                                                                                                                     |   |     |   |    |
| 133 | <b>misc_diagnosis</b><br>Show the field ONLY if: [covid] = '1'                                  | Section Header: <i>Section 7. Algorithm Validation</i><br>Are there any references to the patient being diagnosed with MIS-C at any time during study period? | yesno, Required<br><table border="1"> <tr> <td>1</td> <td>Yes</td> </tr> <tr> <td>0</td> <td>No</td> </tr> </table> | 1 | Yes | 0 | No |
| 1   | Yes                                                                                             |                                                                                                                                                               |                                                                                                                     |   |     |   |    |
| 0   | No                                                                                              |                                                                                                                                                               |                                                                                                                     |   |     |   |    |
| 134 | <b>misc_terms</b><br>Show the field ONLY if: [covid] = '1' and [misc_diagnosis] = '1'           | Enter the MIS-C diagnosis references in the patient's chart:                                                                                                  | notes, Required                                                                                                     |   |     |   |    |
| 135 | <b>misc_date</b><br>Show the field ONLY if: [covid] = '1' and [misc_diagnosis] = '1'            | Enter the first MIS-C diagnosis date:                                                                                                                         | text (date_mdy), Required<br>Field Annotation: @HIDEBUTTON                                                          |   |     |   |    |
| 136 | <b>misc_date_2</b><br>Show the field ONLY if: [covid] = '1' and [misc_diagnosis] = '1'          | Enter the second MIS-C diagnosis date, if applicable. If no second diagnosis, skip this field.                                                                | text (date_mdy)<br>Field Annotation: @HIDEBUTTON                                                                    |   |     |   |    |
| 137 | <b>u099_diagnosis</b><br>Show the field ONLY if: [covid] = '1'                                  | Did the patient have any references to a diagnosis for "PASC" at any time during study period?                                                                | yesno, Required<br><table border="1"> <tr> <td>1</td> <td>Yes</td> </tr> <tr> <td>0</td> <td>No</td> </tr> </table> | 1 | Yes | 0 | No |
| 1   | Yes                                                                                             |                                                                                                                                                               |                                                                                                                     |   |     |   |    |
| 0   | No                                                                                              |                                                                                                                                                               |                                                                                                                     |   |     |   |    |
| 138 | <b>pasc_terms</b><br>Show the field ONLY if: [covid] = '1' and [u099_diagnosis] = '1'           | Enter the PASC diagnoses references in the patient's chart:                                                                                                   | notes, Required                                                                                                     |   |     |   |    |
| 139 | <b>pasc_date</b><br>Show the field ONLY if: [covid] = '1' and [u099_diagnosis] = '1'            | Enter the first PASC diagnosis date:                                                                                                                          | text (date_mdy), Required<br>Field Annotation: @HIDEBUTTON                                                          |   |     |   |    |
| 140 | <b>pasc_date_2</b><br>Show the field ONLY if: [covid] = '1' and [u099_diagnosis] = '1'          | Enter the second PASC diagnosis date, if applicable. If no second diagnosis for this patient, leave field blank.                                              | text (date_mdy)<br>Field Annotation: @HIDEBUTTON                                                                    |   |     |   |    |
| 141 | <b>pcr_antigen_positive</b><br>Show the field ONLY if: [covid] = '1'                            | Did the patient have a positive SARS-CoV-2 RT PCR/ antigen test during the study period?                                                                      | yesno, Required<br><table border="1"> <tr> <td>1</td> <td>Yes</td> </tr> <tr> <td>0</td> <td>No</td> </tr> </table> | 1 | Yes | 0 | No |
| 1   | Yes                                                                                             |                                                                                                                                                               |                                                                                                                     |   |     |   |    |
| 0   | No                                                                                              |                                                                                                                                                               |                                                                                                                     |   |     |   |    |
| 142 | <b>sars_test_date</b><br>Show the field ONLY if: [covid] = '1' and [pcr_antigen_positive] = '1' | Enter the positive SARS-CoV-2 test date:                                                                                                                      | text (date_mdy), Required<br>Field Annotation: @HIDEBUTTON                                                          |   |     |   |    |
| 143 | <b>reason_pcr_antigen_</b>                                                                      | If no, please select the reason why:                                                                                                                          | dropdown, Required                                                                                                  |   |     |   |    |

|     |                                                                                                                                                                   |                                                                                                                  |                                                                                                                                                                                                                                                                                                                                                                                                                                                                                                                                                                                                                           |   |                                                          |             |                                                                                     |                         |                                                                                                                                      |   |                                                                                                                                                       |                 |   |                         |                  |   |                         |                     |   |                         |       |   |                         |                 |
|-----|-------------------------------------------------------------------------------------------------------------------------------------------------------------------|------------------------------------------------------------------------------------------------------------------|---------------------------------------------------------------------------------------------------------------------------------------------------------------------------------------------------------------------------------------------------------------------------------------------------------------------------------------------------------------------------------------------------------------------------------------------------------------------------------------------------------------------------------------------------------------------------------------------------------------------------|---|----------------------------------------------------------|-------------|-------------------------------------------------------------------------------------|-------------------------|--------------------------------------------------------------------------------------------------------------------------------------|---|-------------------------------------------------------------------------------------------------------------------------------------------------------|-----------------|---|-------------------------|------------------|---|-------------------------|---------------------|---|-------------------------|-------|---|-------------------------|-----------------|
|     | <p><b>no</b></p> <p>Show the field ONLY if:<br/>[covid] = '1' and [pcr_antigen_positive] = '0'</p>                                                                |                                                                                                                  | <table border="1"> <tr> <td>1</td> <td>-The patient never had a SARS-CoV-2 RT PCR/ antigen test</td> </tr> <tr> <td>2</td> <td>-The patient was tested but the SARS-CoV-2 RT PCR/ antigen test result was negative</td> </tr> </table>                                                                                                                                                                                                                                                                                                                                                                                    | 1 | -The patient never had a SARS-CoV-2 RT PCR/ antigen test | 2           | -The patient was tested but the SARS-CoV-2 RT PCR/ antigen test result was negative |                         |                                                                                                                                      |   |                                                                                                                                                       |                 |   |                         |                  |   |                         |                     |   |                         |       |   |                         |                 |
| 1   | -The patient never had a SARS-CoV-2 RT PCR/ antigen test                                                                                                          |                                                                                                                  |                                                                                                                                                                                                                                                                                                                                                                                                                                                                                                                                                                                                                           |   |                                                          |             |                                                                                     |                         |                                                                                                                                      |   |                                                                                                                                                       |                 |   |                         |                  |   |                         |                     |   |                         |       |   |                         |                 |
| 2   | -The patient was tested but the SARS-CoV-2 RT PCR/ antigen test result was negative                                                                               |                                                                                                                  |                                                                                                                                                                                                                                                                                                                                                                                                                                                                                                                                                                                                                           |   |                                                          |             |                                                                                     |                         |                                                                                                                                      |   |                                                                                                                                                       |                 |   |                         |                  |   |                         |                     |   |                         |       |   |                         |                 |
| 144 | <p><b>serology_test</b></p> <p>Show the field ONLY if:<br/>[covid] = '1'</p>                                                                                      | Did the patient have SARS-CoV-2 serology positive test result?                                                   | <p>dropdown, Required</p> <table border="1"> <tr> <td>1</td> <td>Yes</td> </tr> <tr> <td>2</td> <td>No, this patient never had a SARS-CoV-2 serology test</td> </tr> <tr> <td>3</td> <td>No, the patient had a SARS-CoV-2 serology test, but the results were negative</td> </tr> <tr> <td>4</td> <td>No, the patient had a SARS-CoV-2 serology test, but the results were positive for antibodies against vaccine antigens (anti-S/RBD rather than anti-N)</td> </tr> </table>                                                                                                                                           | 1 | Yes                                                      | 2           | No, this patient never had a SARS-CoV-2 serology test                               | 3                       | No, the patient had a SARS-CoV-2 serology test, but the results were negative                                                        | 4 | No, the patient had a SARS-CoV-2 serology test, but the results were positive for antibodies against vaccine antigens (anti-S/RBD rather than anti-N) |                 |   |                         |                  |   |                         |                     |   |                         |       |   |                         |                 |
| 1   | Yes                                                                                                                                                               |                                                                                                                  |                                                                                                                                                                                                                                                                                                                                                                                                                                                                                                                                                                                                                           |   |                                                          |             |                                                                                     |                         |                                                                                                                                      |   |                                                                                                                                                       |                 |   |                         |                  |   |                         |                     |   |                         |       |   |                         |                 |
| 2   | No, this patient never had a SARS-CoV-2 serology test                                                                                                             |                                                                                                                  |                                                                                                                                                                                                                                                                                                                                                                                                                                                                                                                                                                                                                           |   |                                                          |             |                                                                                     |                         |                                                                                                                                      |   |                                                                                                                                                       |                 |   |                         |                  |   |                         |                     |   |                         |       |   |                         |                 |
| 3   | No, the patient had a SARS-CoV-2 serology test, but the results were negative                                                                                     |                                                                                                                  |                                                                                                                                                                                                                                                                                                                                                                                                                                                                                                                                                                                                                           |   |                                                          |             |                                                                                     |                         |                                                                                                                                      |   |                                                                                                                                                       |                 |   |                         |                  |   |                         |                     |   |                         |       |   |                         |                 |
| 4   | No, the patient had a SARS-CoV-2 serology test, but the results were positive for antibodies against vaccine antigens (anti-S/RBD rather than anti-N)             |                                                                                                                  |                                                                                                                                                                                                                                                                                                                                                                                                                                                                                                                                                                                                                           |   |                                                          |             |                                                                                     |                         |                                                                                                                                      |   |                                                                                                                                                       |                 |   |                         |                  |   |                         |                     |   |                         |       |   |                         |                 |
| 145 | <p><b>serology_test_reason</b></p> <p>Show the field ONLY if:<br/>[covid] = '1' and ([serology_test] = '1' or [serology_test] = '3' or [serology_test] = '4')</p> | Select the reason why the patient was given a serology test (select all that apply):                             | <p>checkbox, Required</p> <table border="1"> <tr> <td>1</td> <td>serology_test_reason__1</td> <td>Symptomatic</td> </tr> <tr> <td>2</td> <td>serology_test_reason__2</td> <td>Asymptomatic</td> </tr> <tr> <td>3</td> <td>serology_test_reason__3</td> <td>Concern for PAS</td> </tr> <tr> <td>7</td> <td>serology_test_reason__7</td> <td>Concern for MIS-</td> </tr> <tr> <td>4</td> <td>serology_test_reason__4</td> <td>Exposed to COVID 19</td> </tr> <tr> <td>5</td> <td>serology_test_reason__5</td> <td>Other</td> </tr> <tr> <td>6</td> <td>serology_test_reason__6</td> <td>Unsure/Unavaila</td> </tr> </table> | 1 | serology_test_reason__1                                  | Symptomatic | 2                                                                                   | serology_test_reason__2 | Asymptomatic                                                                                                                         | 3 | serology_test_reason__3                                                                                                                               | Concern for PAS | 7 | serology_test_reason__7 | Concern for MIS- | 4 | serology_test_reason__4 | Exposed to COVID 19 | 5 | serology_test_reason__5 | Other | 6 | serology_test_reason__6 | Unsure/Unavaila |
| 1   | serology_test_reason__1                                                                                                                                           | Symptomatic                                                                                                      |                                                                                                                                                                                                                                                                                                                                                                                                                                                                                                                                                                                                                           |   |                                                          |             |                                                                                     |                         |                                                                                                                                      |   |                                                                                                                                                       |                 |   |                         |                  |   |                         |                     |   |                         |       |   |                         |                 |
| 2   | serology_test_reason__2                                                                                                                                           | Asymptomatic                                                                                                     |                                                                                                                                                                                                                                                                                                                                                                                                                                                                                                                                                                                                                           |   |                                                          |             |                                                                                     |                         |                                                                                                                                      |   |                                                                                                                                                       |                 |   |                         |                  |   |                         |                     |   |                         |       |   |                         |                 |
| 3   | serology_test_reason__3                                                                                                                                           | Concern for PAS                                                                                                  |                                                                                                                                                                                                                                                                                                                                                                                                                                                                                                                                                                                                                           |   |                                                          |             |                                                                                     |                         |                                                                                                                                      |   |                                                                                                                                                       |                 |   |                         |                  |   |                         |                     |   |                         |       |   |                         |                 |
| 7   | serology_test_reason__7                                                                                                                                           | Concern for MIS-                                                                                                 |                                                                                                                                                                                                                                                                                                                                                                                                                                                                                                                                                                                                                           |   |                                                          |             |                                                                                     |                         |                                                                                                                                      |   |                                                                                                                                                       |                 |   |                         |                  |   |                         |                     |   |                         |       |   |                         |                 |
| 4   | serology_test_reason__4                                                                                                                                           | Exposed to COVID 19                                                                                              |                                                                                                                                                                                                                                                                                                                                                                                                                                                                                                                                                                                                                           |   |                                                          |             |                                                                                     |                         |                                                                                                                                      |   |                                                                                                                                                       |                 |   |                         |                  |   |                         |                     |   |                         |       |   |                         |                 |
| 5   | serology_test_reason__5                                                                                                                                           | Other                                                                                                            |                                                                                                                                                                                                                                                                                                                                                                                                                                                                                                                                                                                                                           |   |                                                          |             |                                                                                     |                         |                                                                                                                                      |   |                                                                                                                                                       |                 |   |                         |                  |   |                         |                     |   |                         |       |   |                         |                 |
| 6   | serology_test_reason__6                                                                                                                                           | Unsure/Unavaila                                                                                                  |                                                                                                                                                                                                                                                                                                                                                                                                                                                                                                                                                                                                                           |   |                                                          |             |                                                                                     |                         |                                                                                                                                      |   |                                                                                                                                                       |                 |   |                         |                  |   |                         |                     |   |                         |       |   |                         |                 |
| 146 | <p><b>serology_test_date</b></p> <p>Show the field ONLY if:<br/>[covid] = '1' and ([serology_test] = '1' or [serology_test] = '3' or [serology_test] = '4')</p>   | Enter the date of the initial serology test:                                                                     | <p>text (date_mdy), Required</p> <p>Field Annotation: @HIDEBUTTON</p>                                                                                                                                                                                                                                                                                                                                                                                                                                                                                                                                                     |   |                                                          |             |                                                                                     |                         |                                                                                                                                      |   |                                                                                                                                                       |                 |   |                         |                  |   |                         |                     |   |                         |       |   |                         |                 |
| 147 | <p><b>kawasaki_diagnosis</b></p> <p>Show the field ONLY if:<br/>[covid] = '1'</p>                                                                                 | Did the patient have a diagnosis for Kawasaki disease assigned within 42 days of a positive RT-PCR/Antigen test? | <p>dropdown, Required</p> <table border="1"> <tr> <td>1</td> <td>Yes</td> </tr> <tr> <td>2</td> <td>No, this patient never had a diagnosis term for Kawasaki disease</td> </tr> <tr> <td>3</td> <td>No, this patient had a diagnosis term for Kawasaki disease but it was outside of the 42 day window of RT-PCR/Antigen test positivity</td> </tr> </table>                                                                                                                                                                                                                                                              | 1 | Yes                                                      | 2           | No, this patient never had a diagnosis term for Kawasaki disease                    | 3                       | No, this patient had a diagnosis term for Kawasaki disease but it was outside of the 42 day window of RT-PCR/Antigen test positivity |   |                                                                                                                                                       |                 |   |                         |                  |   |                         |                     |   |                         |       |   |                         |                 |
| 1   | Yes                                                                                                                                                               |                                                                                                                  |                                                                                                                                                                                                                                                                                                                                                                                                                                                                                                                                                                                                                           |   |                                                          |             |                                                                                     |                         |                                                                                                                                      |   |                                                                                                                                                       |                 |   |                         |                  |   |                         |                     |   |                         |       |   |                         |                 |
| 2   | No, this patient never had a diagnosis term for Kawasaki disease                                                                                                  |                                                                                                                  |                                                                                                                                                                                                                                                                                                                                                                                                                                                                                                                                                                                                                           |   |                                                          |             |                                                                                     |                         |                                                                                                                                      |   |                                                                                                                                                       |                 |   |                         |                  |   |                         |                     |   |                         |       |   |                         |                 |
| 3   | No, this patient had a diagnosis term for Kawasaki disease but it was outside of the 42 day window of RT-PCR/Antigen test positivity                              |                                                                                                                  |                                                                                                                                                                                                                                                                                                                                                                                                                                                                                                                                                                                                                           |   |                                                          |             |                                                                                     |                         |                                                                                                                                      |   |                                                                                                                                                       |                 |   |                         |                  |   |                         |                     |   |                         |       |   |                         |                 |
| 148 | <p><b>antigen_test_date</b></p> <p>Show the field ONLY if:<br/>[covid] = '1' and [kawasaki_diagnosis] = '3'</p>                                                   | Enter the date of the first RT-PCR/Antigen positive test:                                                        | <p>text (date_mdy), Required</p> <p>Field Annotation: @HIDEBUTTON</p>                                                                                                                                                                                                                                                                                                                                                                                                                                                                                                                                                     |   |                                                          |             |                                                                                     |                         |                                                                                                                                      |   |                                                                                                                                                       |                 |   |                         |                  |   |                         |                     |   |                         |       |   |                         |                 |

|     |                                                                                                                  |                                                                                                                                                                     |                                                                                                                                                                                                                                                                                                                                                                                                                                                                                                                                                                                                                                                                                                                                                                                                                                                                                                                                                                                                                                                                                                                                                                                                                                                                                                                                                                                                                                                                                                                                                                                                                                                                                                                       |   |                    |          |   |                    |                                     |   |                    |               |   |                    |               |   |                    |                              |   |                    |             |   |                    |              |   |                    |          |   |                    |                                  |    |                     |                                      |    |                     |                 |    |                     |           |    |                     |                        |    |                     |              |    |                     |         |    |                     |                |    |                     |                     |    |                     |                                                                                                       |    |                     |                                                  |    |                     |                 |
|-----|------------------------------------------------------------------------------------------------------------------|---------------------------------------------------------------------------------------------------------------------------------------------------------------------|-----------------------------------------------------------------------------------------------------------------------------------------------------------------------------------------------------------------------------------------------------------------------------------------------------------------------------------------------------------------------------------------------------------------------------------------------------------------------------------------------------------------------------------------------------------------------------------------------------------------------------------------------------------------------------------------------------------------------------------------------------------------------------------------------------------------------------------------------------------------------------------------------------------------------------------------------------------------------------------------------------------------------------------------------------------------------------------------------------------------------------------------------------------------------------------------------------------------------------------------------------------------------------------------------------------------------------------------------------------------------------------------------------------------------------------------------------------------------------------------------------------------------------------------------------------------------------------------------------------------------------------------------------------------------------------------------------------------------|---|--------------------|----------|---|--------------------|-------------------------------------|---|--------------------|---------------|---|--------------------|---------------|---|--------------------|------------------------------|---|--------------------|-------------|---|--------------------|--------------|---|--------------------|----------|---|--------------------|----------------------------------|----|---------------------|--------------------------------------|----|---------------------|-----------------|----|---------------------|-----------|----|---------------------|------------------------|----|---------------------|--------------|----|---------------------|---------|----|---------------------|----------------|----|---------------------|---------------------|----|---------------------|-------------------------------------------------------------------------------------------------------|----|---------------------|--------------------------------------------------|----|---------------------|-----------------|
| 149 | <p><b>kawasaki_terms</b></p> <p>Show the field ONLY if:<br/>[covid] = '1' and [kawasaki_diagnosis] = '1'</p>     | <p>Enter the diagnosis terms for Kawasaki Disease found in the patient chart.</p>                                                                                   | <p>text, Required</p>                                                                                                                                                                                                                                                                                                                                                                                                                                                                                                                                                                                                                                                                                                                                                                                                                                                                                                                                                                                                                                                                                                                                                                                                                                                                                                                                                                                                                                                                                                                                                                                                                                                                                                 |   |                    |          |   |                    |                                     |   |                    |               |   |                    |               |   |                    |                              |   |                    |             |   |                    |              |   |                    |          |   |                    |                                  |    |                     |                                      |    |                     |                 |    |                     |           |    |                     |                        |    |                     |              |    |                     |         |    |                     |                |    |                     |                     |    |                     |                                                                                                       |    |                     |                                                  |    |                     |                 |
| 150 | <p><b>kawasaki_diag_date</b></p> <p>Show the field ONLY if:<br/>[covid] = '1' and [kawasaki_diagnosis] = '3'</p> | <p>Enter the date of the first Kawasaki disease diagnosis:</p>                                                                                                      | <p>text (date_mdy), Required<br/>Field Annotation: @HIDEBUTTON</p>                                                                                                                                                                                                                                                                                                                                                                                                                                                                                                                                                                                                                                                                                                                                                                                                                                                                                                                                                                                                                                                                                                                                                                                                                                                                                                                                                                                                                                                                                                                                                                                                                                                    |   |                    |          |   |                    |                                     |   |                    |               |   |                    |               |   |                    |                              |   |                    |             |   |                    |              |   |                    |          |   |                    |                                  |    |                     |                                      |    |                     |                 |    |                     |           |    |                     |                        |    |                     |              |    |                     |         |    |                     |                |    |                     |                     |    |                     |                                                                                                       |    |                     |                                                  |    |                     |                 |
| 151 | <p><b>conditions_post</b></p> <p>Show the field ONLY if:<br/>[covid] = '1'</p>                                   | <p>Did the patient have any occurrence of the following conditions, on Day 28 or later after initial COVID-19 positive diagnosis?</p> <p>Select all that apply.</p> | <p>checkbox, Required</p> <table border="1"> <tr><td>1</td><td>conditions_post__1</td><td>COVID-19</td></tr> <tr><td>2</td><td>conditions_post__2</td><td>Acute respiratory distress syndrome</td></tr> <tr><td>3</td><td>conditions_post__3</td><td>Loss of smell</td></tr> <tr><td>4</td><td>conditions_post__4</td><td>Loss of taste</td></tr> <tr><td>5</td><td>conditions_post__5</td><td>Other changes in smell/taste</td></tr> <tr><td>6</td><td>conditions_post__6</td><td>Myocarditis</td></tr> <tr><td>7</td><td>conditions_post__7</td><td>Pericarditis</td></tr> <tr><td>8</td><td>conditions_post__8</td><td>Myositis</td></tr> <tr><td>9</td><td>conditions_post__9</td><td>Other/ill- defined heart disease</td></tr> <tr><td>10</td><td>conditions_post__10</td><td>Thrombophlebitis and thromboembolism</td></tr> <tr><td>11</td><td>conditions_post__11</td><td>Aplastic anemia</td></tr> <tr><td>12</td><td>conditions_post__12</td><td>Brain fog</td></tr> <tr><td>13</td><td>conditions_post__13</td><td>Abnormal liver enzymes</td></tr> <tr><td>14</td><td>conditions_post__14</td><td>Dysautonomia</td></tr> <tr><td>15</td><td>conditions_post__15</td><td>Fatigue</td></tr> <tr><td>19</td><td>conditions_post__19</td><td>Abdominal Pain</td></tr> <tr><td>20</td><td>conditions_post__20</td><td>Acute Kidney Injury</td></tr> <tr><td>18</td><td>conditions_post__18</td><td>Other (including any rheumatic, musculoskeletal, or non-stomatitis herpetic/chronic viral conditions)</td></tr> <tr><td>16</td><td>conditions_post__16</td><td>No- the patient never had any of these diagnoses</td></tr> <tr><td>17</td><td>conditions_post__17</td><td>No- the patient</td></tr> </table> | 1 | conditions_post__1 | COVID-19 | 2 | conditions_post__2 | Acute respiratory distress syndrome | 3 | conditions_post__3 | Loss of smell | 4 | conditions_post__4 | Loss of taste | 5 | conditions_post__5 | Other changes in smell/taste | 6 | conditions_post__6 | Myocarditis | 7 | conditions_post__7 | Pericarditis | 8 | conditions_post__8 | Myositis | 9 | conditions_post__9 | Other/ill- defined heart disease | 10 | conditions_post__10 | Thrombophlebitis and thromboembolism | 11 | conditions_post__11 | Aplastic anemia | 12 | conditions_post__12 | Brain fog | 13 | conditions_post__13 | Abnormal liver enzymes | 14 | conditions_post__14 | Dysautonomia | 15 | conditions_post__15 | Fatigue | 19 | conditions_post__19 | Abdominal Pain | 20 | conditions_post__20 | Acute Kidney Injury | 18 | conditions_post__18 | Other (including any rheumatic, musculoskeletal, or non-stomatitis herpetic/chronic viral conditions) | 16 | conditions_post__16 | No- the patient never had any of these diagnoses | 17 | conditions_post__17 | No- the patient |
| 1   | conditions_post__1                                                                                               | COVID-19                                                                                                                                                            |                                                                                                                                                                                                                                                                                                                                                                                                                                                                                                                                                                                                                                                                                                                                                                                                                                                                                                                                                                                                                                                                                                                                                                                                                                                                                                                                                                                                                                                                                                                                                                                                                                                                                                                       |   |                    |          |   |                    |                                     |   |                    |               |   |                    |               |   |                    |                              |   |                    |             |   |                    |              |   |                    |          |   |                    |                                  |    |                     |                                      |    |                     |                 |    |                     |           |    |                     |                        |    |                     |              |    |                     |         |    |                     |                |    |                     |                     |    |                     |                                                                                                       |    |                     |                                                  |    |                     |                 |
| 2   | conditions_post__2                                                                                               | Acute respiratory distress syndrome                                                                                                                                 |                                                                                                                                                                                                                                                                                                                                                                                                                                                                                                                                                                                                                                                                                                                                                                                                                                                                                                                                                                                                                                                                                                                                                                                                                                                                                                                                                                                                                                                                                                                                                                                                                                                                                                                       |   |                    |          |   |                    |                                     |   |                    |               |   |                    |               |   |                    |                              |   |                    |             |   |                    |              |   |                    |          |   |                    |                                  |    |                     |                                      |    |                     |                 |    |                     |           |    |                     |                        |    |                     |              |    |                     |         |    |                     |                |    |                     |                     |    |                     |                                                                                                       |    |                     |                                                  |    |                     |                 |
| 3   | conditions_post__3                                                                                               | Loss of smell                                                                                                                                                       |                                                                                                                                                                                                                                                                                                                                                                                                                                                                                                                                                                                                                                                                                                                                                                                                                                                                                                                                                                                                                                                                                                                                                                                                                                                                                                                                                                                                                                                                                                                                                                                                                                                                                                                       |   |                    |          |   |                    |                                     |   |                    |               |   |                    |               |   |                    |                              |   |                    |             |   |                    |              |   |                    |          |   |                    |                                  |    |                     |                                      |    |                     |                 |    |                     |           |    |                     |                        |    |                     |              |    |                     |         |    |                     |                |    |                     |                     |    |                     |                                                                                                       |    |                     |                                                  |    |                     |                 |
| 4   | conditions_post__4                                                                                               | Loss of taste                                                                                                                                                       |                                                                                                                                                                                                                                                                                                                                                                                                                                                                                                                                                                                                                                                                                                                                                                                                                                                                                                                                                                                                                                                                                                                                                                                                                                                                                                                                                                                                                                                                                                                                                                                                                                                                                                                       |   |                    |          |   |                    |                                     |   |                    |               |   |                    |               |   |                    |                              |   |                    |             |   |                    |              |   |                    |          |   |                    |                                  |    |                     |                                      |    |                     |                 |    |                     |           |    |                     |                        |    |                     |              |    |                     |         |    |                     |                |    |                     |                     |    |                     |                                                                                                       |    |                     |                                                  |    |                     |                 |
| 5   | conditions_post__5                                                                                               | Other changes in smell/taste                                                                                                                                        |                                                                                                                                                                                                                                                                                                                                                                                                                                                                                                                                                                                                                                                                                                                                                                                                                                                                                                                                                                                                                                                                                                                                                                                                                                                                                                                                                                                                                                                                                                                                                                                                                                                                                                                       |   |                    |          |   |                    |                                     |   |                    |               |   |                    |               |   |                    |                              |   |                    |             |   |                    |              |   |                    |          |   |                    |                                  |    |                     |                                      |    |                     |                 |    |                     |           |    |                     |                        |    |                     |              |    |                     |         |    |                     |                |    |                     |                     |    |                     |                                                                                                       |    |                     |                                                  |    |                     |                 |
| 6   | conditions_post__6                                                                                               | Myocarditis                                                                                                                                                         |                                                                                                                                                                                                                                                                                                                                                                                                                                                                                                                                                                                                                                                                                                                                                                                                                                                                                                                                                                                                                                                                                                                                                                                                                                                                                                                                                                                                                                                                                                                                                                                                                                                                                                                       |   |                    |          |   |                    |                                     |   |                    |               |   |                    |               |   |                    |                              |   |                    |             |   |                    |              |   |                    |          |   |                    |                                  |    |                     |                                      |    |                     |                 |    |                     |           |    |                     |                        |    |                     |              |    |                     |         |    |                     |                |    |                     |                     |    |                     |                                                                                                       |    |                     |                                                  |    |                     |                 |
| 7   | conditions_post__7                                                                                               | Pericarditis                                                                                                                                                        |                                                                                                                                                                                                                                                                                                                                                                                                                                                                                                                                                                                                                                                                                                                                                                                                                                                                                                                                                                                                                                                                                                                                                                                                                                                                                                                                                                                                                                                                                                                                                                                                                                                                                                                       |   |                    |          |   |                    |                                     |   |                    |               |   |                    |               |   |                    |                              |   |                    |             |   |                    |              |   |                    |          |   |                    |                                  |    |                     |                                      |    |                     |                 |    |                     |           |    |                     |                        |    |                     |              |    |                     |         |    |                     |                |    |                     |                     |    |                     |                                                                                                       |    |                     |                                                  |    |                     |                 |
| 8   | conditions_post__8                                                                                               | Myositis                                                                                                                                                            |                                                                                                                                                                                                                                                                                                                                                                                                                                                                                                                                                                                                                                                                                                                                                                                                                                                                                                                                                                                                                                                                                                                                                                                                                                                                                                                                                                                                                                                                                                                                                                                                                                                                                                                       |   |                    |          |   |                    |                                     |   |                    |               |   |                    |               |   |                    |                              |   |                    |             |   |                    |              |   |                    |          |   |                    |                                  |    |                     |                                      |    |                     |                 |    |                     |           |    |                     |                        |    |                     |              |    |                     |         |    |                     |                |    |                     |                     |    |                     |                                                                                                       |    |                     |                                                  |    |                     |                 |
| 9   | conditions_post__9                                                                                               | Other/ill- defined heart disease                                                                                                                                    |                                                                                                                                                                                                                                                                                                                                                                                                                                                                                                                                                                                                                                                                                                                                                                                                                                                                                                                                                                                                                                                                                                                                                                                                                                                                                                                                                                                                                                                                                                                                                                                                                                                                                                                       |   |                    |          |   |                    |                                     |   |                    |               |   |                    |               |   |                    |                              |   |                    |             |   |                    |              |   |                    |          |   |                    |                                  |    |                     |                                      |    |                     |                 |    |                     |           |    |                     |                        |    |                     |              |    |                     |         |    |                     |                |    |                     |                     |    |                     |                                                                                                       |    |                     |                                                  |    |                     |                 |
| 10  | conditions_post__10                                                                                              | Thrombophlebitis and thromboembolism                                                                                                                                |                                                                                                                                                                                                                                                                                                                                                                                                                                                                                                                                                                                                                                                                                                                                                                                                                                                                                                                                                                                                                                                                                                                                                                                                                                                                                                                                                                                                                                                                                                                                                                                                                                                                                                                       |   |                    |          |   |                    |                                     |   |                    |               |   |                    |               |   |                    |                              |   |                    |             |   |                    |              |   |                    |          |   |                    |                                  |    |                     |                                      |    |                     |                 |    |                     |           |    |                     |                        |    |                     |              |    |                     |         |    |                     |                |    |                     |                     |    |                     |                                                                                                       |    |                     |                                                  |    |                     |                 |
| 11  | conditions_post__11                                                                                              | Aplastic anemia                                                                                                                                                     |                                                                                                                                                                                                                                                                                                                                                                                                                                                                                                                                                                                                                                                                                                                                                                                                                                                                                                                                                                                                                                                                                                                                                                                                                                                                                                                                                                                                                                                                                                                                                                                                                                                                                                                       |   |                    |          |   |                    |                                     |   |                    |               |   |                    |               |   |                    |                              |   |                    |             |   |                    |              |   |                    |          |   |                    |                                  |    |                     |                                      |    |                     |                 |    |                     |           |    |                     |                        |    |                     |              |    |                     |         |    |                     |                |    |                     |                     |    |                     |                                                                                                       |    |                     |                                                  |    |                     |                 |
| 12  | conditions_post__12                                                                                              | Brain fog                                                                                                                                                           |                                                                                                                                                                                                                                                                                                                                                                                                                                                                                                                                                                                                                                                                                                                                                                                                                                                                                                                                                                                                                                                                                                                                                                                                                                                                                                                                                                                                                                                                                                                                                                                                                                                                                                                       |   |                    |          |   |                    |                                     |   |                    |               |   |                    |               |   |                    |                              |   |                    |             |   |                    |              |   |                    |          |   |                    |                                  |    |                     |                                      |    |                     |                 |    |                     |           |    |                     |                        |    |                     |              |    |                     |         |    |                     |                |    |                     |                     |    |                     |                                                                                                       |    |                     |                                                  |    |                     |                 |
| 13  | conditions_post__13                                                                                              | Abnormal liver enzymes                                                                                                                                              |                                                                                                                                                                                                                                                                                                                                                                                                                                                                                                                                                                                                                                                                                                                                                                                                                                                                                                                                                                                                                                                                                                                                                                                                                                                                                                                                                                                                                                                                                                                                                                                                                                                                                                                       |   |                    |          |   |                    |                                     |   |                    |               |   |                    |               |   |                    |                              |   |                    |             |   |                    |              |   |                    |          |   |                    |                                  |    |                     |                                      |    |                     |                 |    |                     |           |    |                     |                        |    |                     |              |    |                     |         |    |                     |                |    |                     |                     |    |                     |                                                                                                       |    |                     |                                                  |    |                     |                 |
| 14  | conditions_post__14                                                                                              | Dysautonomia                                                                                                                                                        |                                                                                                                                                                                                                                                                                                                                                                                                                                                                                                                                                                                                                                                                                                                                                                                                                                                                                                                                                                                                                                                                                                                                                                                                                                                                                                                                                                                                                                                                                                                                                                                                                                                                                                                       |   |                    |          |   |                    |                                     |   |                    |               |   |                    |               |   |                    |                              |   |                    |             |   |                    |              |   |                    |          |   |                    |                                  |    |                     |                                      |    |                     |                 |    |                     |           |    |                     |                        |    |                     |              |    |                     |         |    |                     |                |    |                     |                     |    |                     |                                                                                                       |    |                     |                                                  |    |                     |                 |
| 15  | conditions_post__15                                                                                              | Fatigue                                                                                                                                                             |                                                                                                                                                                                                                                                                                                                                                                                                                                                                                                                                                                                                                                                                                                                                                                                                                                                                                                                                                                                                                                                                                                                                                                                                                                                                                                                                                                                                                                                                                                                                                                                                                                                                                                                       |   |                    |          |   |                    |                                     |   |                    |               |   |                    |               |   |                    |                              |   |                    |             |   |                    |              |   |                    |          |   |                    |                                  |    |                     |                                      |    |                     |                 |    |                     |           |    |                     |                        |    |                     |              |    |                     |         |    |                     |                |    |                     |                     |    |                     |                                                                                                       |    |                     |                                                  |    |                     |                 |
| 19  | conditions_post__19                                                                                              | Abdominal Pain                                                                                                                                                      |                                                                                                                                                                                                                                                                                                                                                                                                                                                                                                                                                                                                                                                                                                                                                                                                                                                                                                                                                                                                                                                                                                                                                                                                                                                                                                                                                                                                                                                                                                                                                                                                                                                                                                                       |   |                    |          |   |                    |                                     |   |                    |               |   |                    |               |   |                    |                              |   |                    |             |   |                    |              |   |                    |          |   |                    |                                  |    |                     |                                      |    |                     |                 |    |                     |           |    |                     |                        |    |                     |              |    |                     |         |    |                     |                |    |                     |                     |    |                     |                                                                                                       |    |                     |                                                  |    |                     |                 |
| 20  | conditions_post__20                                                                                              | Acute Kidney Injury                                                                                                                                                 |                                                                                                                                                                                                                                                                                                                                                                                                                                                                                                                                                                                                                                                                                                                                                                                                                                                                                                                                                                                                                                                                                                                                                                                                                                                                                                                                                                                                                                                                                                                                                                                                                                                                                                                       |   |                    |          |   |                    |                                     |   |                    |               |   |                    |               |   |                    |                              |   |                    |             |   |                    |              |   |                    |          |   |                    |                                  |    |                     |                                      |    |                     |                 |    |                     |           |    |                     |                        |    |                     |              |    |                     |         |    |                     |                |    |                     |                     |    |                     |                                                                                                       |    |                     |                                                  |    |                     |                 |
| 18  | conditions_post__18                                                                                              | Other (including any rheumatic, musculoskeletal, or non-stomatitis herpetic/chronic viral conditions)                                                               |                                                                                                                                                                                                                                                                                                                                                                                                                                                                                                                                                                                                                                                                                                                                                                                                                                                                                                                                                                                                                                                                                                                                                                                                                                                                                                                                                                                                                                                                                                                                                                                                                                                                                                                       |   |                    |          |   |                    |                                     |   |                    |               |   |                    |               |   |                    |                              |   |                    |             |   |                    |              |   |                    |          |   |                    |                                  |    |                     |                                      |    |                     |                 |    |                     |           |    |                     |                        |    |                     |              |    |                     |         |    |                     |                |    |                     |                     |    |                     |                                                                                                       |    |                     |                                                  |    |                     |                 |
| 16  | conditions_post__16                                                                                              | No- the patient never had any of these diagnoses                                                                                                                    |                                                                                                                                                                                                                                                                                                                                                                                                                                                                                                                                                                                                                                                                                                                                                                                                                                                                                                                                                                                                                                                                                                                                                                                                                                                                                                                                                                                                                                                                                                                                                                                                                                                                                                                       |   |                    |          |   |                    |                                     |   |                    |               |   |                    |               |   |                    |                              |   |                    |             |   |                    |              |   |                    |          |   |                    |                                  |    |                     |                                      |    |                     |                 |    |                     |           |    |                     |                        |    |                     |              |    |                     |         |    |                     |                |    |                     |                     |    |                     |                                                                                                       |    |                     |                                                  |    |                     |                 |
| 17  | conditions_post__17                                                                                              | No- the patient                                                                                                                                                     |                                                                                                                                                                                                                                                                                                                                                                                                                                                                                                                                                                                                                                                                                                                                                                                                                                                                                                                                                                                                                                                                                                                                                                                                                                                                                                                                                                                                                                                                                                                                                                                                                                                                                                                       |   |                    |          |   |                    |                                     |   |                    |               |   |                    |               |   |                    |                              |   |                    |             |   |                    |              |   |                    |          |   |                    |                                  |    |                     |                                      |    |                     |                 |    |                     |           |    |                     |                        |    |                     |              |    |                     |         |    |                     |                |    |                     |                     |    |                     |                                                                                                       |    |                     |                                                  |    |                     |                 |

|     |                                                                                                                                   |                                                                                                                                                                              |                                                                                                                                                                                                                                                                                                                                                                   |   |                                                                         |   |                                                                                        |   |                       |
|-----|-----------------------------------------------------------------------------------------------------------------------------------|------------------------------------------------------------------------------------------------------------------------------------------------------------------------------|-------------------------------------------------------------------------------------------------------------------------------------------------------------------------------------------------------------------------------------------------------------------------------------------------------------------------------------------------------------------|---|-------------------------------------------------------------------------|---|----------------------------------------------------------------------------------------|---|-----------------------|
|     |                                                                                                                                   |                                                                                                                                                                              | had some of these diagnoses but prior to Day 28 after initial COVID positive diagnosis                                                                                                                                                                                                                                                                            |   |                                                                         |   |                                                                                        |   |                       |
| 152 | <b>pasc_other</b><br>Show the field ONLY if: [conditions_post(18)] = '1'                                                          | List the Other conditions and first 2 diagnosis dates of each condition:                                                                                                     | notes, Required                                                                                                                                                                                                                                                                                                                                                   |   |                                                                         |   |                                                                                        |   |                       |
| 153 | <b>pasc_other_smell</b><br>Show the field ONLY if: [conditions_post(5)] = '1'                                                     | List the Other Changes in Smell/Taste conditions and first 2 diagnosis dates of each condition:                                                                              | notes, Required                                                                                                                                                                                                                                                                                                                                                   |   |                                                                         |   |                                                                                        |   |                       |
| 154 | <b>pasc_other_heart</b><br>Show the field ONLY if: [conditions_post(9)] = '1'                                                     | List the Other/Ill-defined Heart Disease conditions and first 2 diagnosis dates of each condition:                                                                           | notes, Required                                                                                                                                                                                                                                                                                                                                                   |   |                                                                         |   |                                                                                        |   |                       |
| 155 | <b>covid_diagnosis_pasc_other</b><br>Show the field ONLY if: [conditions_post(18)] = '1'                                          | Did the physician state in the chart whether any of these Other conditions were due to PASC?                                                                                 | dropdown, Required<br><table border="1"> <tr> <td>1</td> <td>Yes, the physician stated one or more of the conditions was due to PASC</td> </tr> <tr> <td>2</td> <td>No, the physician stated that all the conditions were due to something other than PASC</td> </tr> <tr> <td>3</td> <td>Unknown/Not Available</td> </tr> </table> Field Annotation: @HIDEBUTTON | 1 | Yes, the physician stated one or more of the conditions was due to PASC | 2 | No, the physician stated that all the conditions were due to something other than PASC | 3 | Unknown/Not Available |
| 1   | Yes, the physician stated one or more of the conditions was due to PASC                                                           |                                                                                                                                                                              |                                                                                                                                                                                                                                                                                                                                                                   |   |                                                                         |   |                                                                                        |   |                       |
| 2   | No, the physician stated that all the conditions were due to something other than PASC                                            |                                                                                                                                                                              |                                                                                                                                                                                                                                                                                                                                                                   |   |                                                                         |   |                                                                                        |   |                       |
| 3   | Unknown/Not Available                                                                                                             |                                                                                                                                                                              |                                                                                                                                                                                                                                                                                                                                                                   |   |                                                                         |   |                                                                                        |   |                       |
| 156 | <b>covid_diagnosis_pasc_y_other</b><br>Show the field ONLY if: [conditions_post(18)] = '1' and [covid_diagnosis_pasc_other] = '1' | Copy and paste the language from the physician notes that says the continued Other COVID diagnosis was related to PASC (make sure to remove any PHI, such as MRNs or names): | notes, Required<br>Field Annotation: @HIDEBUTTON                                                                                                                                                                                                                                                                                                                  |   |                                                                         |   |                                                                                        |   |                       |
| 157 | <b>covid_date_followup</b><br>Show the field ONLY if: [conditions_post(1)] = '1'                                                  | Enter the first COVID diagnosis date found during the follow-up period:                                                                                                      | text (date_mdy), Required<br>Field Annotation: @HIDEBUTTON                                                                                                                                                                                                                                                                                                        |   |                                                                         |   |                                                                                        |   |                       |
| 158 | <b>covid_endstatus</b><br>Show the field ONLY if: [conditions_post(1)] = '1'                                                      | At the end of the follow-up period, the COVID diagnosis was:                                                                                                                 | dropdown, Required<br><table border="1"> <tr> <td>1</td> <td>Resolved</td> </tr> <tr> <td>2</td> <td>Ongoing</td> </tr> <tr> <td>3</td> <td>Unknown/Unavailable</td> </tr> </table> Field Annotation: @HIDEBUTTON                                                                                                                                                 | 1 | Resolved                                                                | 2 | Ongoing                                                                                | 3 | Unknown/Unavailable   |
| 1   | Resolved                                                                                                                          |                                                                                                                                                                              |                                                                                                                                                                                                                                                                                                                                                                   |   |                                                                         |   |                                                                                        |   |                       |
| 2   | Ongoing                                                                                                                           |                                                                                                                                                                              |                                                                                                                                                                                                                                                                                                                                                                   |   |                                                                         |   |                                                                                        |   |                       |
| 3   | Unknown/Unavailable                                                                                                               |                                                                                                                                                                              |                                                                                                                                                                                                                                                                                                                                                                   |   |                                                                         |   |                                                                                        |   |                       |
| 159 | <b>covid_diagnosis_pasc</b><br>Show the field ONLY if: [conditions_post(1)] = '1'                                                 | Did the physician state in the chart whether this continued COVID diagnosis was due to PASC?                                                                                 | dropdown, Required<br><table border="1"> <tr> <td>1</td> <td>Yes, the physician stated this condition was due to PASC</td> </tr> </table>                                                                                                                                                                                                                         | 1 | Yes, the physician stated this condition was due to PASC                |   |                                                                                        |   |                       |
| 1   | Yes, the physician stated this condition was due to PASC                                                                          |                                                                                                                                                                              |                                                                                                                                                                                                                                                                                                                                                                   |   |                                                                         |   |                                                                                        |   |                       |

|     |                                                                                                                                       |                                                                                                                                                                         |                                                                                                                                                                                                                                                                                                                                                          |   |                                                                                   |   |                                                                                   |   |                       |
|-----|---------------------------------------------------------------------------------------------------------------------------------------|-------------------------------------------------------------------------------------------------------------------------------------------------------------------------|----------------------------------------------------------------------------------------------------------------------------------------------------------------------------------------------------------------------------------------------------------------------------------------------------------------------------------------------------------|---|-----------------------------------------------------------------------------------|---|-----------------------------------------------------------------------------------|---|-----------------------|
|     |                                                                                                                                       |                                                                                                                                                                         | <table border="1"> <tr> <td>2</td> <td>No, the physician stated that this condition was due to something other than PASC</td> </tr> <tr> <td>3</td> <td>Unknown/Not Available</td> </tr> </table> <p>Field Annotation: @HIDEBUTTON</p>                                                                                                                   | 2 | No, the physician stated that this condition was due to something other than PASC | 3 | Unknown/Not Available                                                             |   |                       |
| 2   | No, the physician stated that this condition was due to something other than PASC                                                     |                                                                                                                                                                         |                                                                                                                                                                                                                                                                                                                                                          |   |                                                                                   |   |                                                                                   |   |                       |
| 3   | Unknown/Not Available                                                                                                                 |                                                                                                                                                                         |                                                                                                                                                                                                                                                                                                                                                          |   |                                                                                   |   |                                                                                   |   |                       |
| 160 | <p><b>covid_diagnosis_pasc_y</b></p> <p>Show the field ONLY if: [conditions_post(1)] = '1' and [covid_diagnosis_pasc] = '1'</p>       | Copy and paste the language from the physician notes that says this continued COVID diagnosis was related to PASC (make sure to remove any PHI, such as MRNs or names): | notes, Required<br>Field Annotation: @HIDEBUTTON                                                                                                                                                                                                                                                                                                         |   |                                                                                   |   |                                                                                   |   |                       |
| 161 | <p><b>acuteres_date_followup</b></p> <p>Show the field ONLY if: [conditions_post(2)] = '1'</p>                                        | Enter the first Acute respiratory distress syndrome diagnosis date found during the follow-up period:                                                                   | text (date_mdy), Required<br>Field Annotation: @HIDEBUTTON                                                                                                                                                                                                                                                                                               |   |                                                                                   |   |                                                                                   |   |                       |
| 162 | <p><b>acuteres_date_followup_2</b></p> <p>Show the field ONLY if: [conditions_post(2)] = '1'</p>                                      | Enter the second Acute respiratory distress syndrome diagnosis date found during the follow-up period, if applicable:                                                   | text (date_mdy)<br>Field Annotation: @HIDEBUTTON                                                                                                                                                                                                                                                                                                         |   |                                                                                   |   |                                                                                   |   |                       |
| 163 | <p><b>acuteres_endstatus</b></p> <p>Show the field ONLY if: [conditions_post(2)] = '1'</p>                                            | At the end of the follow-up period, the Acute respiratory distress syndrome was:                                                                                        | <p>dropdown, Required</p> <table border="1"> <tr> <td>1</td> <td>Resolved</td> </tr> <tr> <td>2</td> <td>Ongoing</td> </tr> <tr> <td>3</td> <td>Unknown/Unavailable</td> </tr> </table> <p>Field Annotation: @HIDEBUTTON</p>                                                                                                                             | 1 | Resolved                                                                          | 2 | Ongoing                                                                           | 3 | Unknown/Unavailable   |
| 1   | Resolved                                                                                                                              |                                                                                                                                                                         |                                                                                                                                                                                                                                                                                                                                                          |   |                                                                                   |   |                                                                                   |   |                       |
| 2   | Ongoing                                                                                                                               |                                                                                                                                                                         |                                                                                                                                                                                                                                                                                                                                                          |   |                                                                                   |   |                                                                                   |   |                       |
| 3   | Unknown/Unavailable                                                                                                                   |                                                                                                                                                                         |                                                                                                                                                                                                                                                                                                                                                          |   |                                                                                   |   |                                                                                   |   |                       |
| 164 | <p><b>acuteres_diagnosis_pasc</b></p> <p>Show the field ONLY if: [conditions_post(2)] = '1'</p>                                       | Did the physician state in the chart whether the Acute respiratory distress syndrome diagnosis was due to PASC?                                                         | <p>dropdown, Required</p> <table border="1"> <tr> <td>1</td> <td>Yes, the physician stated this condition was due to PASC</td> </tr> <tr> <td>2</td> <td>No, the physician stated that this condition was due to something other than PASC</td> </tr> <tr> <td>3</td> <td>Unknown/Not Available</td> </tr> </table> <p>Field Annotation: @HIDEBUTTON</p> | 1 | Yes, the physician stated this condition was due to PASC                          | 2 | No, the physician stated that this condition was due to something other than PASC | 3 | Unknown/Not Available |
| 1   | Yes, the physician stated this condition was due to PASC                                                                              |                                                                                                                                                                         |                                                                                                                                                                                                                                                                                                                                                          |   |                                                                                   |   |                                                                                   |   |                       |
| 2   | No, the physician stated that this condition was due to something other than PASC                                                     |                                                                                                                                                                         |                                                                                                                                                                                                                                                                                                                                                          |   |                                                                                   |   |                                                                                   |   |                       |
| 3   | Unknown/Not Available                                                                                                                 |                                                                                                                                                                         |                                                                                                                                                                                                                                                                                                                                                          |   |                                                                                   |   |                                                                                   |   |                       |
| 165 | <p><b>acuteres_diagnosis_pasc_y</b></p> <p>Show the field ONLY if: [conditions_post(2)] = '1' and [acuteres_diagnosis_pasc] = '1'</p> | Copy and paste the language from the physician notes that states this Acute respiratory distress syndrome diagnosis was related to PASC:                                | notes, Required<br>Field Annotation: @HIDEBUTTON                                                                                                                                                                                                                                                                                                         |   |                                                                                   |   |                                                                                   |   |                       |
| 166 | <p><b>losssmell_date_followup</b></p> <p>Show the field ONLY if:</p>                                                                  | Enter the first Loss of smell diagnosis date found during the follow-up period:                                                                                         | text (date_mdy), Required<br>Field Annotation: @HIDEBUTTON                                                                                                                                                                                                                                                                                               |   |                                                                                   |   |                                                                                   |   |                       |

|     |                                                                                                                                                 |                                                                                                                   |                                                                                                                                                                                                                                                                                                                                                 |   |                                                          |   |                                                                                   |   |                       |
|-----|-------------------------------------------------------------------------------------------------------------------------------------------------|-------------------------------------------------------------------------------------------------------------------|-------------------------------------------------------------------------------------------------------------------------------------------------------------------------------------------------------------------------------------------------------------------------------------------------------------------------------------------------|---|----------------------------------------------------------|---|-----------------------------------------------------------------------------------|---|-----------------------|
|     | [conditions_post(3)] = '1'                                                                                                                      |                                                                                                                   |                                                                                                                                                                                                                                                                                                                                                 |   |                                                          |   |                                                                                   |   |                       |
| 167 | <p><b>losssmell_date_followup_2</b></p> <p>Show the field ONLY if:<br/>[conditions_post(3)] = '1'</p>                                           | Enter the second Loss of smell diagnosis date found during the follow-up period, if applicable:                   | <p>text (date_mdy)</p> <p>Field Annotation: @HIDEBUTTON</p>                                                                                                                                                                                                                                                                                     |   |                                                          |   |                                                                                   |   |                       |
| 168 | <p><b>losssmell_endstatuses</b></p> <p>Show the field ONLY if:<br/>[conditions_post(3)] = '1'</p>                                               | At the end of the follow-up period, the Loss of smell was:                                                        | <p>dropdown, Required</p> <table border="1"> <tr><td>1</td><td>Resolved</td></tr> <tr><td>2</td><td>Ongoing</td></tr> <tr><td>3</td><td>Unknown/Unavailable</td></tr> </table> <p>Field Annotation: @HIDEBUTTON</p>                                                                                                                             | 1 | Resolved                                                 | 2 | Ongoing                                                                           | 3 | Unknown/Unavailable   |
| 1   | Resolved                                                                                                                                        |                                                                                                                   |                                                                                                                                                                                                                                                                                                                                                 |   |                                                          |   |                                                                                   |   |                       |
| 2   | Ongoing                                                                                                                                         |                                                                                                                   |                                                                                                                                                                                                                                                                                                                                                 |   |                                                          |   |                                                                                   |   |                       |
| 3   | Unknown/Unavailable                                                                                                                             |                                                                                                                   |                                                                                                                                                                                                                                                                                                                                                 |   |                                                          |   |                                                                                   |   |                       |
| 169 | <p><b>losssmell_diagnosis_pasc</b></p> <p>Show the field ONLY if:<br/>[conditions_post(3)] = '1'</p>                                            | Did the physician state in the chart whether the Loss of smell diagnosis was due to PASC?                         | <p>dropdown, Required</p> <table border="1"> <tr><td>1</td><td>Yes, the physician stated this condition was due to PASC</td></tr> <tr><td>2</td><td>No, the physician stated that this condition was due to something other than PASC</td></tr> <tr><td>3</td><td>Unknown/Not Available</td></tr> </table> <p>Field Annotation: @HIDEBUTTON</p> | 1 | Yes, the physician stated this condition was due to PASC | 2 | No, the physician stated that this condition was due to something other than PASC | 3 | Unknown/Not Available |
| 1   | Yes, the physician stated this condition was due to PASC                                                                                        |                                                                                                                   |                                                                                                                                                                                                                                                                                                                                                 |   |                                                          |   |                                                                                   |   |                       |
| 2   | No, the physician stated that this condition was due to something other than PASC                                                               |                                                                                                                   |                                                                                                                                                                                                                                                                                                                                                 |   |                                                          |   |                                                                                   |   |                       |
| 3   | Unknown/Not Available                                                                                                                           |                                                                                                                   |                                                                                                                                                                                                                                                                                                                                                 |   |                                                          |   |                                                                                   |   |                       |
| 170 | <p><b>losssmell_diagnosis_pasc_y</b></p> <p>Show the field ONLY if:<br/>[conditions_post(3)] = '1'<br/>and [losssmell_diagnosis_pasc] = '1'</p> | Copy and paste the language from the physician notes that states the Loss of smell diagnosis was related to PASC: | <p>notes, Required</p> <p>Field Annotation: @HIDEBUTTON</p>                                                                                                                                                                                                                                                                                     |   |                                                          |   |                                                                                   |   |                       |
| 171 | <p><b>losstaste_date_followup</b></p> <p>Show the field ONLY if:<br/>[conditions_post(4)] = '1'</p>                                             | Enter the first Loss of taste diagnosis date found during the follow-up period:                                   | <p>text (date_mdy), Required</p> <p>Field Annotation: @HIDEBUTTON</p>                                                                                                                                                                                                                                                                           |   |                                                          |   |                                                                                   |   |                       |
| 172 | <p><b>losstaste_date_followup_2</b></p> <p>Show the field ONLY if:<br/>[conditions_post(4)] = '1'</p>                                           | Enter the second Loss of taste diagnosis date found during the follow-up period, if applicable:                   | <p>text (date_mdy)</p> <p>Field Annotation: @HIDEBUTTON</p>                                                                                                                                                                                                                                                                                     |   |                                                          |   |                                                                                   |   |                       |
| 173 | <p><b>losstaste_endstatuses</b></p> <p>Show the field ONLY if:<br/>[conditions_post(4)] = '1'</p>                                               | At the end of the follow-up period, the Loss of taste was:                                                        | <p>dropdown, Required</p> <table border="1"> <tr><td>1</td><td>Resolved</td></tr> <tr><td>2</td><td>Ongoing</td></tr> <tr><td>3</td><td>Unknown/Unavailable</td></tr> </table> <p>Field Annotation: @HIDEBUTTON</p>                                                                                                                             | 1 | Resolved                                                 | 2 | Ongoing                                                                           | 3 | Unknown/Unavailable   |
| 1   | Resolved                                                                                                                                        |                                                                                                                   |                                                                                                                                                                                                                                                                                                                                                 |   |                                                          |   |                                                                                   |   |                       |
| 2   | Ongoing                                                                                                                                         |                                                                                                                   |                                                                                                                                                                                                                                                                                                                                                 |   |                                                          |   |                                                                                   |   |                       |
| 3   | Unknown/Unavailable                                                                                                                             |                                                                                                                   |                                                                                                                                                                                                                                                                                                                                                 |   |                                                          |   |                                                                                   |   |                       |
| 174 | <p><b>losstaste_diagnosis_pasc</b></p> <p>Show the field ONLY if:</p>                                                                           | Did the physician state in the chart whether the Loss of taste diagnosis was due to PASC?                         | <p>dropdown, Required</p> <table border="1"> <tr><td>1</td><td>Yes, the physician stated this condition was due to PASC</td></tr> </table>                                                                                                                                                                                                      | 1 | Yes, the physician stated this condition was due to PASC |   |                                                                                   |   |                       |
| 1   | Yes, the physician stated this condition was due to PASC                                                                                        |                                                                                                                   |                                                                                                                                                                                                                                                                                                                                                 |   |                                                          |   |                                                                                   |   |                       |

|     |                                                                                                                                                 |                                                                                                                   |                                                                                                                                                                                                                                                                                                                                                          |   |                                                                                   |   |                                                                                   |   |                       |
|-----|-------------------------------------------------------------------------------------------------------------------------------------------------|-------------------------------------------------------------------------------------------------------------------|----------------------------------------------------------------------------------------------------------------------------------------------------------------------------------------------------------------------------------------------------------------------------------------------------------------------------------------------------------|---|-----------------------------------------------------------------------------------|---|-----------------------------------------------------------------------------------|---|-----------------------|
|     | [conditions_post(4)] = '1'                                                                                                                      |                                                                                                                   | <table border="1"> <tr> <td>2</td> <td>No, the physician stated that this condition was due to something other than PASC</td> </tr> <tr> <td>3</td> <td>Unknown/Not Available</td> </tr> </table> <p>Field Annotation: @HIDEBUTTON</p>                                                                                                                   | 2 | No, the physician stated that this condition was due to something other than PASC | 3 | Unknown/Not Available                                                             |   |                       |
| 2   | No, the physician stated that this condition was due to something other than PASC                                                               |                                                                                                                   |                                                                                                                                                                                                                                                                                                                                                          |   |                                                                                   |   |                                                                                   |   |                       |
| 3   | Unknown/Not Available                                                                                                                           |                                                                                                                   |                                                                                                                                                                                                                                                                                                                                                          |   |                                                                                   |   |                                                                                   |   |                       |
| 175 | <p><b>losstaste_diagnosis_pasc_y</b></p> <p>Show the field ONLY if:<br/>[conditions_post(4)] = '1'<br/>and [losstaste_diagnosis_pasc] = '1'</p> | Copy and paste the language from the physician notes that states the Loss of taste diagnosis was due to PASC:     | notes, Required<br>Field Annotation: @HIDEBUTTON                                                                                                                                                                                                                                                                                                         |   |                                                                                   |   |                                                                                   |   |                       |
| 176 | <p><b>lossother_date_followup</b></p> <p>Show the field ONLY if:<br/>[conditions_post(5)] = '1'</p>                                             | Enter the first Other Change of Smell/Taste date found during the follow-up period:                               | text (date_mdy), Required<br>Field Annotation: @HIDEBUTTON                                                                                                                                                                                                                                                                                               |   |                                                                                   |   |                                                                                   |   |                       |
| 177 | <p><b>lossother_date_followup_2</b></p> <p>Show the field ONLY if:<br/>[conditions_post(5)] = '1'</p>                                           | Enter the second Other Change of Smell/Taste date found during the follow-up period, if applicable:               | text (date_mdy)<br>Field Annotation: @HIDEBUTTON                                                                                                                                                                                                                                                                                                         |   |                                                                                   |   |                                                                                   |   |                       |
| 178 | <p><b>lossother_endstatus</b></p> <p>Show the field ONLY if:<br/>[conditions_post(5)] = '1'</p>                                                 | At the end of the follow-up period, the Other Change of Smell/Taste was:                                          | <p>dropdown, Required</p> <table border="1"> <tr> <td>1</td> <td>Resolved</td> </tr> <tr> <td>2</td> <td>Ongoing</td> </tr> <tr> <td>3</td> <td>Unknown/Unavailable</td> </tr> </table> <p>Field Annotation: @HIDEBUTTON</p>                                                                                                                             | 1 | Resolved                                                                          | 2 | Ongoing                                                                           | 3 | Unknown/Unavailable   |
| 1   | Resolved                                                                                                                                        |                                                                                                                   |                                                                                                                                                                                                                                                                                                                                                          |   |                                                                                   |   |                                                                                   |   |                       |
| 2   | Ongoing                                                                                                                                         |                                                                                                                   |                                                                                                                                                                                                                                                                                                                                                          |   |                                                                                   |   |                                                                                   |   |                       |
| 3   | Unknown/Unavailable                                                                                                                             |                                                                                                                   |                                                                                                                                                                                                                                                                                                                                                          |   |                                                                                   |   |                                                                                   |   |                       |
| 179 | <p><b>lossother_diagnosis_pasc</b></p> <p>Show the field ONLY if:<br/>[conditions_post(5)] = '1'</p>                                            | Did the physician state in the chart whether the Other Change of Smell/Taste was due to PASC?                     | <p>dropdown, Required</p> <table border="1"> <tr> <td>1</td> <td>Yes, the physician stated this condition was due to PASC</td> </tr> <tr> <td>2</td> <td>No, the physician stated that this condition was due to something other than PASC</td> </tr> <tr> <td>3</td> <td>Unknown/Not Available</td> </tr> </table> <p>Field Annotation: @HIDEBUTTON</p> | 1 | Yes, the physician stated this condition was due to PASC                          | 2 | No, the physician stated that this condition was due to something other than PASC | 3 | Unknown/Not Available |
| 1   | Yes, the physician stated this condition was due to PASC                                                                                        |                                                                                                                   |                                                                                                                                                                                                                                                                                                                                                          |   |                                                                                   |   |                                                                                   |   |                       |
| 2   | No, the physician stated that this condition was due to something other than PASC                                                               |                                                                                                                   |                                                                                                                                                                                                                                                                                                                                                          |   |                                                                                   |   |                                                                                   |   |                       |
| 3   | Unknown/Not Available                                                                                                                           |                                                                                                                   |                                                                                                                                                                                                                                                                                                                                                          |   |                                                                                   |   |                                                                                   |   |                       |
| 180 | <p><b>lossother_diagnosis_pasc_y</b></p> <p>Show the field ONLY if:<br/>[conditions_post(5)] = '1'<br/>and [lossother_diagnosis_pasc] = '1'</p> | Copy and paste the language from the physician notes that states the Other Change of Smell/Taste was due to PASC: | notes, Required<br>Field Annotation: @HIDEBUTTON                                                                                                                                                                                                                                                                                                         |   |                                                                                   |   |                                                                                   |   |                       |
| 181 | <p><b>myocarditis_date_followup</b></p> <p>Show the field ONLY if:</p>                                                                          | Enter the first Myocarditis diagnosis date found during the follow-up period:                                     | text (date_mdy), Required<br>Field Annotation: @HIDEBUTTON                                                                                                                                                                                                                                                                                               |   |                                                                                   |   |                                                                                   |   |                       |

|     |                                                                                                                                                     |                                                                                                             |                                                                                                                                                                                                                                                                                                                                      |   |                                                          |   |                                                                                   |   |                       |
|-----|-----------------------------------------------------------------------------------------------------------------------------------------------------|-------------------------------------------------------------------------------------------------------------|--------------------------------------------------------------------------------------------------------------------------------------------------------------------------------------------------------------------------------------------------------------------------------------------------------------------------------------|---|----------------------------------------------------------|---|-----------------------------------------------------------------------------------|---|-----------------------|
|     | [conditions_post(6)] = '1'                                                                                                                          |                                                                                                             |                                                                                                                                                                                                                                                                                                                                      |   |                                                          |   |                                                                                   |   |                       |
| 182 | <p><b>myocarditis_date_followup_2</b></p> <p>Show the field ONLY if:<br/>[conditions_post(6)] = '1'</p>                                             | Enter the second Myocarditis diagnosis date found during the follow-up period, if applicable:               | text (date_mdy)<br>Field Annotation: @HIDEBUTTON                                                                                                                                                                                                                                                                                     |   |                                                          |   |                                                                                   |   |                       |
| 183 | <p><b>myocarditis_endstatus</b></p> <p>Show the field ONLY if:<br/>[conditions_post(6)] = '1'</p>                                                   | At the end of the follow-up period, the Myocarditis was:                                                    | dropdown, Required<br><table border="1"> <tr><td>1</td><td>Resolved</td></tr> <tr><td>2</td><td>Ongoing</td></tr> <tr><td>3</td><td>Unknown/Unavailable</td></tr> </table> Field Annotation: @HIDEBUTTON                                                                                                                             | 1 | Resolved                                                 | 2 | Ongoing                                                                           | 3 | Unknown/Unavailable   |
| 1   | Resolved                                                                                                                                            |                                                                                                             |                                                                                                                                                                                                                                                                                                                                      |   |                                                          |   |                                                                                   |   |                       |
| 2   | Ongoing                                                                                                                                             |                                                                                                             |                                                                                                                                                                                                                                                                                                                                      |   |                                                          |   |                                                                                   |   |                       |
| 3   | Unknown/Unavailable                                                                                                                                 |                                                                                                             |                                                                                                                                                                                                                                                                                                                                      |   |                                                          |   |                                                                                   |   |                       |
| 184 | <p><b>myocarditis_diagnosis_pasc</b></p> <p>Show the field ONLY if:<br/>[conditions_post(6)] = '1'</p>                                              | Did the physician state in the notes whether the Myocarditis diagnosis was due to PASC?                     | dropdown, Required<br><table border="1"> <tr><td>1</td><td>Yes, the physician stated this condition was due to PASC</td></tr> <tr><td>2</td><td>No, the physician stated that this condition was due to something other than PASC</td></tr> <tr><td>3</td><td>Unknown/Not Available</td></tr> </table> Field Annotation: @HIDEBUTTON | 1 | Yes, the physician stated this condition was due to PASC | 2 | No, the physician stated that this condition was due to something other than PASC | 3 | Unknown/Not Available |
| 1   | Yes, the physician stated this condition was due to PASC                                                                                            |                                                                                                             |                                                                                                                                                                                                                                                                                                                                      |   |                                                          |   |                                                                                   |   |                       |
| 2   | No, the physician stated that this condition was due to something other than PASC                                                                   |                                                                                                             |                                                                                                                                                                                                                                                                                                                                      |   |                                                          |   |                                                                                   |   |                       |
| 3   | Unknown/Not Available                                                                                                                               |                                                                                                             |                                                                                                                                                                                                                                                                                                                                      |   |                                                          |   |                                                                                   |   |                       |
| 185 | <p><b>myocarditis_diagnosis_pasc_y</b></p> <p>Show the field ONLY if:<br/>[conditions_post(6)] = '1'<br/>and [myocarditis_diagnosis_pasc] = '1'</p> | Copy and paste the language from the physician notes that states the Myocarditis diagnosis was due to PASC: | notes, Required<br>Field Annotation: @HIDEBUTTON                                                                                                                                                                                                                                                                                     |   |                                                          |   |                                                                                   |   |                       |
| 186 | <p><b>pericarditis_date_followup</b></p> <p>Show the field ONLY if:<br/>[conditions_post(7)] = '1'</p>                                              | Enter the first Pericarditis diagnosis date found during the follow-up period:                              | text (date_mdy), Required<br>Field Annotation: @HIDEBUTTON                                                                                                                                                                                                                                                                           |   |                                                          |   |                                                                                   |   |                       |
| 187 | <p><b>pericarditis_date_followup_2</b></p> <p>Show the field ONLY if:<br/>[conditions_post(7)] = '1'</p>                                            | Enter the second Pericarditis diagnosis date found during the follow-up period, if applicable:              | text (date_mdy)<br>Field Annotation: @HIDEBUTTON                                                                                                                                                                                                                                                                                     |   |                                                          |   |                                                                                   |   |                       |
| 188 | <p><b>pericarditis_endstatus</b></p> <p>Show the field ONLY if:<br/>[conditions_post(7)] = '1'</p>                                                  | At the end of the follow-up period, the Pericarditis was:                                                   | dropdown, Required<br><table border="1"> <tr><td>1</td><td>Resolved</td></tr> <tr><td>2</td><td>Ongoing</td></tr> <tr><td>3</td><td>Unknown/Unavailable</td></tr> </table> Field Annotation: @HIDEBUTTON                                                                                                                             | 1 | Resolved                                                 | 2 | Ongoing                                                                           | 3 | Unknown/Unavailable   |
| 1   | Resolved                                                                                                                                            |                                                                                                             |                                                                                                                                                                                                                                                                                                                                      |   |                                                          |   |                                                                                   |   |                       |
| 2   | Ongoing                                                                                                                                             |                                                                                                             |                                                                                                                                                                                                                                                                                                                                      |   |                                                          |   |                                                                                   |   |                       |
| 3   | Unknown/Unavailable                                                                                                                                 |                                                                                                             |                                                                                                                                                                                                                                                                                                                                      |   |                                                          |   |                                                                                   |   |                       |
| 189 | <p><b>pericarditis_diagnosis_pasc</b></p> <p>Show the field ONLY if:</p>                                                                            | Did the physician state in the notes whether the Pericarditis diagnosis was due to PASC?                    | dropdown, Required<br><table border="1"> <tr><td>1</td><td>Yes, the physician stated this condition was due to PASC</td></tr> </table>                                                                                                                                                                                               | 1 | Yes, the physician stated this condition was due to PASC |   |                                                                                   |   |                       |
| 1   | Yes, the physician stated this condition was due to PASC                                                                                            |                                                                                                             |                                                                                                                                                                                                                                                                                                                                      |   |                                                          |   |                                                                                   |   |                       |

|     |                                                                                                                                                       |                                                                                                              |                                                                                                                                                                                                                                                                                                                                                          |   |                                                                                   |   |                                                                                   |   |                       |
|-----|-------------------------------------------------------------------------------------------------------------------------------------------------------|--------------------------------------------------------------------------------------------------------------|----------------------------------------------------------------------------------------------------------------------------------------------------------------------------------------------------------------------------------------------------------------------------------------------------------------------------------------------------------|---|-----------------------------------------------------------------------------------|---|-----------------------------------------------------------------------------------|---|-----------------------|
|     | [conditions_post(7)] = '1'                                                                                                                            |                                                                                                              | <table border="1"> <tr> <td>2</td> <td>No, the physician stated that this condition was due to something other than PASC</td> </tr> <tr> <td>3</td> <td>Unknown/Not Available</td> </tr> </table> <p>Field Annotation: @HIDEBUTTON</p>                                                                                                                   | 2 | No, the physician stated that this condition was due to something other than PASC | 3 | Unknown/Not Available                                                             |   |                       |
| 2   | No, the physician stated that this condition was due to something other than PASC                                                                     |                                                                                                              |                                                                                                                                                                                                                                                                                                                                                          |   |                                                                                   |   |                                                                                   |   |                       |
| 3   | Unknown/Not Available                                                                                                                                 |                                                                                                              |                                                                                                                                                                                                                                                                                                                                                          |   |                                                                                   |   |                                                                                   |   |                       |
| 190 | <p><b>pericarditis_diagnosis_pasc_y</b></p> <p>Show the field ONLY if:<br/>[conditions_post(7)] = '1'<br/>and [pericarditis_diagnosis_pasc] = '1'</p> | Copy and paste the language from the physician notes that states the Pericarditis diagnosis was due to PASC: | notes, Required<br>Field Annotation: @HIDEBUTTON                                                                                                                                                                                                                                                                                                         |   |                                                                                   |   |                                                                                   |   |                       |
| 191 | <p><b>myositis_date_followup</b></p> <p>Show the field ONLY if:<br/>[conditions_post(8)] = '1'</p>                                                    | Enter the first Myositis diagnosis date found during the follow-up period:                                   | text (date_mdy), Required<br>Field Annotation: @HIDEBUTTON                                                                                                                                                                                                                                                                                               |   |                                                                                   |   |                                                                                   |   |                       |
| 192 | <p><b>myositis_date_followup_2</b></p> <p>Show the field ONLY if:<br/>[conditions_post(8)] = '1'</p>                                                  | Enter the second Myositis diagnosis date found during the follow-up period, if applicable:                   | text (date_mdy)<br>Field Annotation: @HIDEBUTTON                                                                                                                                                                                                                                                                                                         |   |                                                                                   |   |                                                                                   |   |                       |
| 193 | <p><b>myositis_endstatus</b></p> <p>Show the field ONLY if:<br/>[conditions_post(8)] = '1'</p>                                                        | At the end of the follow-up period, the Myositis was:                                                        | <p>dropdown, Required</p> <table border="1"> <tr> <td>1</td> <td>Resolved</td> </tr> <tr> <td>2</td> <td>Ongoing</td> </tr> <tr> <td>3</td> <td>Unknown/Unavailable</td> </tr> </table> <p>Field Annotation: @HIDEBUTTON</p>                                                                                                                             | 1 | Resolved                                                                          | 2 | Ongoing                                                                           | 3 | Unknown/Unavailable   |
| 1   | Resolved                                                                                                                                              |                                                                                                              |                                                                                                                                                                                                                                                                                                                                                          |   |                                                                                   |   |                                                                                   |   |                       |
| 2   | Ongoing                                                                                                                                               |                                                                                                              |                                                                                                                                                                                                                                                                                                                                                          |   |                                                                                   |   |                                                                                   |   |                       |
| 3   | Unknown/Unavailable                                                                                                                                   |                                                                                                              |                                                                                                                                                                                                                                                                                                                                                          |   |                                                                                   |   |                                                                                   |   |                       |
| 194 | <p><b>myositis_diagnosis_pasc</b></p> <p>Show the field ONLY if:<br/>[conditions_post(8)] = '1'</p>                                                   | Did the physician state in the notes whether the Myositis diagnosis was due to PASC?                         | <p>dropdown, Required</p> <table border="1"> <tr> <td>1</td> <td>Yes, the physician stated this condition was due to PASC</td> </tr> <tr> <td>2</td> <td>No, the physician stated that this condition was due to something other than PASC</td> </tr> <tr> <td>3</td> <td>Unknown/Not Available</td> </tr> </table> <p>Field Annotation: @HIDEBUTTON</p> | 1 | Yes, the physician stated this condition was due to PASC                          | 2 | No, the physician stated that this condition was due to something other than PASC | 3 | Unknown/Not Available |
| 1   | Yes, the physician stated this condition was due to PASC                                                                                              |                                                                                                              |                                                                                                                                                                                                                                                                                                                                                          |   |                                                                                   |   |                                                                                   |   |                       |
| 2   | No, the physician stated that this condition was due to something other than PASC                                                                     |                                                                                                              |                                                                                                                                                                                                                                                                                                                                                          |   |                                                                                   |   |                                                                                   |   |                       |
| 3   | Unknown/Not Available                                                                                                                                 |                                                                                                              |                                                                                                                                                                                                                                                                                                                                                          |   |                                                                                   |   |                                                                                   |   |                       |
| 195 | <p><b>myositis_diagnosis_pasc_y</b></p> <p>Show the field ONLY if:<br/>[conditions_post(8)] = '1'<br/>and [myositis_diagnosis_pasc] = '1'</p>         | Copy and paste the language from the notes that states the Myositis diagnosis was due to PASC:               | notes, Required<br>Field Annotation: @HIDEBUTTON                                                                                                                                                                                                                                                                                                         |   |                                                                                   |   |                                                                                   |   |                       |
| 196 | <p><b>illheart_date_followup</b></p> <p>Show the field ONLY if:</p>                                                                                   | Enter the first Other/ill-defined heart disease diagnosis date found during the follow-up period:            | text (date_mdy), Required<br>Field Annotation: @HIDEBUTTON                                                                                                                                                                                                                                                                                               |   |                                                                                   |   |                                                                                   |   |                       |

|     |                                                                                                                                       |                                                                                                                       |                                                                                                                                                                                                                                                                                                                                      |   |                                                          |   |                                                                                   |   |                       |
|-----|---------------------------------------------------------------------------------------------------------------------------------------|-----------------------------------------------------------------------------------------------------------------------|--------------------------------------------------------------------------------------------------------------------------------------------------------------------------------------------------------------------------------------------------------------------------------------------------------------------------------------|---|----------------------------------------------------------|---|-----------------------------------------------------------------------------------|---|-----------------------|
|     | [conditions_post(9)] = '1'                                                                                                            |                                                                                                                       |                                                                                                                                                                                                                                                                                                                                      |   |                                                          |   |                                                                                   |   |                       |
| 197 | <p><b>illheart_date_followup_2</b></p> <p>Show the field ONLY if: [conditions_post(9)] = '1'</p>                                      | Enter the second Other/ill-defined heart disease diagnosis date found during the follow-up period, if applicable:     | text (date_mdy)<br>Field Annotation: @HIDEBUTTON                                                                                                                                                                                                                                                                                     |   |                                                          |   |                                                                                   |   |                       |
| 198 | <p><b>illheart_endstatus</b></p> <p>Show the field ONLY if: [conditions_post(9)] = '1'</p>                                            | At the end of the follow-up period, the Other/ill-defined heart disease was:                                          | dropdown, Required<br><table border="1"> <tr><td>1</td><td>Resolved</td></tr> <tr><td>2</td><td>Ongoing</td></tr> <tr><td>3</td><td>Unknown/Unavailable</td></tr> </table> Field Annotation: @HIDEBUTTON                                                                                                                             | 1 | Resolved                                                 | 2 | Ongoing                                                                           | 3 | Unknown/Unavailable   |
| 1   | Resolved                                                                                                                              |                                                                                                                       |                                                                                                                                                                                                                                                                                                                                      |   |                                                          |   |                                                                                   |   |                       |
| 2   | Ongoing                                                                                                                               |                                                                                                                       |                                                                                                                                                                                                                                                                                                                                      |   |                                                          |   |                                                                                   |   |                       |
| 3   | Unknown/Unavailable                                                                                                                   |                                                                                                                       |                                                                                                                                                                                                                                                                                                                                      |   |                                                          |   |                                                                                   |   |                       |
| 199 | <p><b>illheart_diagnosis_pasc</b></p> <p>Show the field ONLY if: [conditions_post(9)] = '1'</p>                                       | Did the physician state in the notes whether the Other/ill-defined heart disease diagnosis was due to PASC?           | dropdown, Required<br><table border="1"> <tr><td>1</td><td>Yes, the physician stated this condition was due to PASC</td></tr> <tr><td>2</td><td>No, the physician stated that this condition was due to something other than PASC</td></tr> <tr><td>3</td><td>Unknown/Not Available</td></tr> </table> Field Annotation: @HIDEBUTTON | 1 | Yes, the physician stated this condition was due to PASC | 2 | No, the physician stated that this condition was due to something other than PASC | 3 | Unknown/Not Available |
| 1   | Yes, the physician stated this condition was due to PASC                                                                              |                                                                                                                       |                                                                                                                                                                                                                                                                                                                                      |   |                                                          |   |                                                                                   |   |                       |
| 2   | No, the physician stated that this condition was due to something other than PASC                                                     |                                                                                                                       |                                                                                                                                                                                                                                                                                                                                      |   |                                                          |   |                                                                                   |   |                       |
| 3   | Unknown/Not Available                                                                                                                 |                                                                                                                       |                                                                                                                                                                                                                                                                                                                                      |   |                                                          |   |                                                                                   |   |                       |
| 200 | <p><b>illheart_diagnosis_pasc_y</b></p> <p>Show the field ONLY if: [conditions_post(9)] = '1' and [illheart_diagnosis_pasc] = '1'</p> | Copy and paste the language from the notes that states the Other/ill-defined heart disease diagnosis was due to PASC: | notes, Required<br>Field Annotation: @HIDEBUTTON                                                                                                                                                                                                                                                                                     |   |                                                          |   |                                                                                   |   |                       |
| 201 | <p><b>thrombo_date_followup</b></p> <p>Show the field ONLY if: [conditions_post(10)] = '1'</p>                                        | Enter the first Thrombophlebitis/thromboembolism diagnosis date found during the follow-up period:                    | text (date_mdy), Required<br>Field Annotation: @HIDEBUTTON                                                                                                                                                                                                                                                                           |   |                                                          |   |                                                                                   |   |                       |
| 202 | <p><b>thrombo_date_followup_2</b></p> <p>Show the field ONLY if: [conditions_post(10)] = '1'</p>                                      | Enter the second Thrombophlebitis/thromboembolism diagnosis date found during the follow-up period, if applicable:    | text (date_mdy)<br>Field Annotation: @HIDEBUTTON                                                                                                                                                                                                                                                                                     |   |                                                          |   |                                                                                   |   |                       |
| 203 | <p><b>thrombo_endstatus</b></p> <p>Show the field ONLY if: [conditions_post(10)] = '1'</p>                                            | At the end of the follow-up period, the Thrombophlebitis/thromboembolism was:                                         | dropdown, Required<br><table border="1"> <tr><td>1</td><td>Resolved</td></tr> <tr><td>2</td><td>Ongoing</td></tr> <tr><td>3</td><td>Unknown/Unavailable</td></tr> </table> Field Annotation: @HIDEBUTTON                                                                                                                             | 1 | Resolved                                                 | 2 | Ongoing                                                                           | 3 | Unknown/Unavailable   |
| 1   | Resolved                                                                                                                              |                                                                                                                       |                                                                                                                                                                                                                                                                                                                                      |   |                                                          |   |                                                                                   |   |                       |
| 2   | Ongoing                                                                                                                               |                                                                                                                       |                                                                                                                                                                                                                                                                                                                                      |   |                                                          |   |                                                                                   |   |                       |
| 3   | Unknown/Unavailable                                                                                                                   |                                                                                                                       |                                                                                                                                                                                                                                                                                                                                      |   |                                                          |   |                                                                                   |   |                       |
| 204 | <p><b>thrombo_diagnosis_p</b></p>                                                                                                     | Did the physician state in the notes whether the                                                                      | dropdown, Required                                                                                                                                                                                                                                                                                                                   |   |                                                          |   |                                                                                   |   |                       |

|     |                                                                                                                                          |                                                                                                                               |                                                                                                                                                                                                                                                                                                                                                                                                                                                                                                                                                          |   |                                                          |   |                                                                                   |   |                       |
|-----|------------------------------------------------------------------------------------------------------------------------------------------|-------------------------------------------------------------------------------------------------------------------------------|----------------------------------------------------------------------------------------------------------------------------------------------------------------------------------------------------------------------------------------------------------------------------------------------------------------------------------------------------------------------------------------------------------------------------------------------------------------------------------------------------------------------------------------------------------|---|----------------------------------------------------------|---|-----------------------------------------------------------------------------------|---|-----------------------|
|     | <p><b>asc</b></p> <p>Show the field ONLY if:<br/>[conditions_post(10)] = '1'</p>                                                         | <p>Thrombophlebitis/thromboembolism diagnosis was due to PASC?</p>                                                            | <table border="1"> <tr> <td data-bbox="1052 113 1084 184">1</td> <td data-bbox="1084 113 1549 184">Yes, the physician stated this condition was due to PASC</td> </tr> <tr> <td data-bbox="1052 184 1084 300">2</td> <td data-bbox="1084 184 1549 300">No, the physician stated that this condition was due to something other than PASC</td> </tr> <tr> <td data-bbox="1052 300 1084 348">3</td> <td data-bbox="1084 300 1549 348">Unknown/Not Available</td> </tr> </table> <p>Field Annotation: @HIDEBUTTON</p>                                       | 1 | Yes, the physician stated this condition was due to PASC | 2 | No, the physician stated that this condition was due to something other than PASC | 3 | Unknown/Not Available |
| 1   | Yes, the physician stated this condition was due to PASC                                                                                 |                                                                                                                               |                                                                                                                                                                                                                                                                                                                                                                                                                                                                                                                                                          |   |                                                          |   |                                                                                   |   |                       |
| 2   | No, the physician stated that this condition was due to something other than PASC                                                        |                                                                                                                               |                                                                                                                                                                                                                                                                                                                                                                                                                                                                                                                                                          |   |                                                          |   |                                                                                   |   |                       |
| 3   | Unknown/Not Available                                                                                                                    |                                                                                                                               |                                                                                                                                                                                                                                                                                                                                                                                                                                                                                                                                                          |   |                                                          |   |                                                                                   |   |                       |
| 205 | <p><b>thrombo_diagnosis_pasc_y</b></p> <p>Show the field ONLY if:<br/>[conditions_post(10)] = '1' and [thrombo_diagnosis_pasc] = '1'</p> | <p>Copy and paste the language from the notes that states the Thrombophlebitis/thromboembolism diagnosis was due to PASC:</p> | <p>notes, Required<br/>Field Annotation: @HIDEBUTTON</p>                                                                                                                                                                                                                                                                                                                                                                                                                                                                                                 |   |                                                          |   |                                                                                   |   |                       |
| 206 | <p><b>anemia_date_followup</b></p> <p>Show the field ONLY if:<br/>[conditions_post(11)] = '1'</p>                                        | <p>Enter the first Aplastic anemia diagnosis date found during the follow-up period:</p>                                      | <p>text (date_mdy), Required<br/>Field Annotation: @HIDEBUTTON</p>                                                                                                                                                                                                                                                                                                                                                                                                                                                                                       |   |                                                          |   |                                                                                   |   |                       |
| 207 | <p><b>anemia_date_followup_2</b></p> <p>Show the field ONLY if:<br/>[conditions_post(11)] = '1'</p>                                      | <p>Enter the second Aplastic anemia diagnosis date found during the follow-up period, if applicable:</p>                      | <p>text (date_mdy)<br/>Field Annotation: @HIDEBUTTON</p>                                                                                                                                                                                                                                                                                                                                                                                                                                                                                                 |   |                                                          |   |                                                                                   |   |                       |
| 208 | <p><b>anemia_endstatus</b></p> <p>Show the field ONLY if:<br/>[conditions_post(11)] = '1'</p>                                            | <p>At the end of the follow-up period, the Aplastic anemia was:</p>                                                           | <p>dropdown, Required</p> <table border="1"> <tr> <td data-bbox="1052 1104 1084 1152">1</td> <td data-bbox="1084 1104 1349 1152">Resolved</td> </tr> <tr> <td data-bbox="1052 1152 1084 1201">2</td> <td data-bbox="1084 1152 1349 1201">Ongoing</td> </tr> <tr> <td data-bbox="1052 1201 1084 1249">3</td> <td data-bbox="1084 1201 1349 1249">Unknown/Unavailable</td> </tr> </table> <p>Field Annotation: @HIDEBUTTON</p>                                                                                                                             | 1 | Resolved                                                 | 2 | Ongoing                                                                           | 3 | Unknown/Unavailable   |
| 1   | Resolved                                                                                                                                 |                                                                                                                               |                                                                                                                                                                                                                                                                                                                                                                                                                                                                                                                                                          |   |                                                          |   |                                                                                   |   |                       |
| 2   | Ongoing                                                                                                                                  |                                                                                                                               |                                                                                                                                                                                                                                                                                                                                                                                                                                                                                                                                                          |   |                                                          |   |                                                                                   |   |                       |
| 3   | Unknown/Unavailable                                                                                                                      |                                                                                                                               |                                                                                                                                                                                                                                                                                                                                                                                                                                                                                                                                                          |   |                                                          |   |                                                                                   |   |                       |
| 209 | <p><b>anemia_diagnosis_pasc</b></p> <p>Show the field ONLY if:<br/>[conditions_post(11)] = '1'</p>                                       | <p>Did the physician state in the notes whether the Aplastic anemia diagnosis was due to PASC?</p>                            | <p>dropdown, Required</p> <table border="1"> <tr> <td data-bbox="1052 1367 1084 1438">1</td> <td data-bbox="1084 1367 1549 1438">Yes, the physician stated this condition was due to PASC</td> </tr> <tr> <td data-bbox="1052 1438 1084 1554">2</td> <td data-bbox="1084 1438 1549 1554">No, the physician stated that this condition was due to something other than PASC</td> </tr> <tr> <td data-bbox="1052 1554 1084 1602">3</td> <td data-bbox="1084 1554 1549 1602">Unknown/Not Available</td> </tr> </table> <p>Field Annotation: @HIDEBUTTON</p> | 1 | Yes, the physician stated this condition was due to PASC | 2 | No, the physician stated that this condition was due to something other than PASC | 3 | Unknown/Not Available |
| 1   | Yes, the physician stated this condition was due to PASC                                                                                 |                                                                                                                               |                                                                                                                                                                                                                                                                                                                                                                                                                                                                                                                                                          |   |                                                          |   |                                                                                   |   |                       |
| 2   | No, the physician stated that this condition was due to something other than PASC                                                        |                                                                                                                               |                                                                                                                                                                                                                                                                                                                                                                                                                                                                                                                                                          |   |                                                          |   |                                                                                   |   |                       |
| 3   | Unknown/Not Available                                                                                                                    |                                                                                                                               |                                                                                                                                                                                                                                                                                                                                                                                                                                                                                                                                                          |   |                                                          |   |                                                                                   |   |                       |
| 210 | <p><b>anemia_diagnosis_pasc_y</b></p> <p>Show the field ONLY if:<br/>[conditions_post(11)] = '1' and [anemia_diagnosis_pasc] = '1'</p>   | <p>Copy and paste the language from the notes that states the Aplastic anemia diagnosis was due to PASC:</p>                  | <p>notes, Required<br/>Field Annotation: @HIDEBUTTON</p>                                                                                                                                                                                                                                                                                                                                                                                                                                                                                                 |   |                                                          |   |                                                                                   |   |                       |

|     |                                                                                                                                                 |                                                                                                                 |                                                                                                                                                                                                                                                                                                                                                                                         |   |                                                          |   |                                                                                   |   |                       |
|-----|-------------------------------------------------------------------------------------------------------------------------------------------------|-----------------------------------------------------------------------------------------------------------------|-----------------------------------------------------------------------------------------------------------------------------------------------------------------------------------------------------------------------------------------------------------------------------------------------------------------------------------------------------------------------------------------|---|----------------------------------------------------------|---|-----------------------------------------------------------------------------------|---|-----------------------|
| 211 | <p><b>brainfog_date_follo<br/>wup</b></p> <p>Show the field ONLY if:<br/>[conditions_post(12)] = '1'</p>                                        | <p>Enter the first Brain fog diagnosis date found during the follow-up period:</p>                              | <p>text (date_mdy), Required<br/>Field Annotation: @HIDEBUTTON</p>                                                                                                                                                                                                                                                                                                                      |   |                                                          |   |                                                                                   |   |                       |
| 212 | <p><b>brainfog_date_follo<br/>wup_2</b></p> <p>Show the field ONLY if:<br/>[conditions_post(12)] = '1'</p>                                      | <p>Enter the second Brain fog diagnosis date found during the follow-up period, if applicable:</p>              | <p>text (date_mdy)<br/>Field Annotation: @HIDEBUTTON</p>                                                                                                                                                                                                                                                                                                                                |   |                                                          |   |                                                                                   |   |                       |
| 213 | <p><b>brainfog_endstatus</b></p> <p>Show the field ONLY if:<br/>[conditions_post(12)] = '1'</p>                                                 | <p>At the end of the follow-up period, the Brain fog was:</p>                                                   | <p>dropdown, Required</p> <table border="1" data-bbox="1052 543 1349 690"> <tr> <td>1</td> <td>Resolved</td> </tr> <tr> <td>2</td> <td>Ongoing</td> </tr> <tr> <td>3</td> <td>Unknown/Unavailable</td> </tr> </table> <p>Field Annotation: @HIDEBUTTON</p>                                                                                                                              | 1 | Resolved                                                 | 2 | Ongoing                                                                           | 3 | Unknown/Unavailable   |
| 1   | Resolved                                                                                                                                        |                                                                                                                 |                                                                                                                                                                                                                                                                                                                                                                                         |   |                                                          |   |                                                                                   |   |                       |
| 2   | Ongoing                                                                                                                                         |                                                                                                                 |                                                                                                                                                                                                                                                                                                                                                                                         |   |                                                          |   |                                                                                   |   |                       |
| 3   | Unknown/Unavailable                                                                                                                             |                                                                                                                 |                                                                                                                                                                                                                                                                                                                                                                                         |   |                                                          |   |                                                                                   |   |                       |
| 214 | <p><b>brainfog_diagnosis_<br/>pasc</b></p> <p>Show the field ONLY if:<br/>[conditions_post(12)] = '1'</p>                                       | <p>Did the physician state in the notes whether the Brain fog diagnosis was due to PASC?</p>                    | <p>dropdown, Required</p> <table border="1" data-bbox="1052 806 1544 1052"> <tr> <td>1</td> <td>Yes, the physician stated this condition was due to PASC</td> </tr> <tr> <td>2</td> <td>No, the physician stated that this condition was due to something other than PASC</td> </tr> <tr> <td>3</td> <td>Unknown/Not Available</td> </tr> </table> <p>Field Annotation: @HIDEBUTTON</p> | 1 | Yes, the physician stated this condition was due to PASC | 2 | No, the physician stated that this condition was due to something other than PASC | 3 | Unknown/Not Available |
| 1   | Yes, the physician stated this condition was due to PASC                                                                                        |                                                                                                                 |                                                                                                                                                                                                                                                                                                                                                                                         |   |                                                          |   |                                                                                   |   |                       |
| 2   | No, the physician stated that this condition was due to something other than PASC                                                               |                                                                                                                 |                                                                                                                                                                                                                                                                                                                                                                                         |   |                                                          |   |                                                                                   |   |                       |
| 3   | Unknown/Not Available                                                                                                                           |                                                                                                                 |                                                                                                                                                                                                                                                                                                                                                                                         |   |                                                          |   |                                                                                   |   |                       |
| 215 | <p><b>brainfog_diagnosis_<br/>pasc_y</b></p> <p>Show the field ONLY if:<br/>[conditions_post(12)] = '1' and [brainfog_diagnosis_pasc] = '1'</p> | <p>Copy and paste the language from the notes that states the Brain fog diagnosis was due to PASC:</p>          | <p>notes, Required<br/>Field Annotation: @HIDEBUTTON</p>                                                                                                                                                                                                                                                                                                                                |   |                                                          |   |                                                                                   |   |                       |
| 216 | <p><b>liverenzy_date_foll<br/>owup</b></p> <p>Show the field ONLY if:<br/>[conditions_post(13)] = '1'</p>                                       | <p>Enter the first Abnormal liver enzymes diagnosis date found during the follow-up period:</p>                 | <p>text (date_mdy), Required<br/>Field Annotation: @HIDEBUTTON</p>                                                                                                                                                                                                                                                                                                                      |   |                                                          |   |                                                                                   |   |                       |
| 217 | <p><b>liverenzy_date_foll<br/>owup_2</b></p> <p>Show the field ONLY if:<br/>[conditions_post(13)] = '1'</p>                                     | <p>Enter the second Abnormal liver enzymes diagnosis date found during the follow-up period, if applicable:</p> | <p>text (date_mdy)<br/>Field Annotation: @HIDEBUTTON</p>                                                                                                                                                                                                                                                                                                                                |   |                                                          |   |                                                                                   |   |                       |
| 218 | <p><b>liverenzy_endstatu<br/>s</b></p> <p>Show the field ONLY if:<br/>[conditions_post(13)] = '1'</p>                                           | <p>At the end of the follow-up period, the Abnormal liver enzymes were:</p>                                     | <p>dropdown, Required</p> <table border="1" data-bbox="1052 1814 1349 1923"> <tr> <td>1</td> <td>Resolved</td> </tr> <tr> <td>2</td> <td>Ongoing</td> </tr> </table>                                                                                                                                                                                                                    | 1 | Resolved                                                 | 2 | Ongoing                                                                           |   |                       |
| 1   | Resolved                                                                                                                                        |                                                                                                                 |                                                                                                                                                                                                                                                                                                                                                                                         |   |                                                          |   |                                                                                   |   |                       |
| 2   | Ongoing                                                                                                                                         |                                                                                                                 |                                                                                                                                                                                                                                                                                                                                                                                         |   |                                                          |   |                                                                                   |   |                       |

|     |                                                                                                                                          |                                                                                                              |                                                                                                                                                                                                                                                                                                                                                          |   |                                                          |   |                                                                                   |   |                       |
|-----|------------------------------------------------------------------------------------------------------------------------------------------|--------------------------------------------------------------------------------------------------------------|----------------------------------------------------------------------------------------------------------------------------------------------------------------------------------------------------------------------------------------------------------------------------------------------------------------------------------------------------------|---|----------------------------------------------------------|---|-----------------------------------------------------------------------------------|---|-----------------------|
|     | 1'                                                                                                                                       |                                                                                                              | <table border="1"> <tr> <td>3</td> <td>Unknown/Unavailable</td> </tr> </table> <p>Field Annotation: @HIDEBUTTON</p>                                                                                                                                                                                                                                      | 3 | Unknown/Unavailable                                      |   |                                                                                   |   |                       |
| 3   | Unknown/Unavailable                                                                                                                      |                                                                                                              |                                                                                                                                                                                                                                                                                                                                                          |   |                                                          |   |                                                                                   |   |                       |
| 219 | <p><b>liverenzy_diagnosis_pasc</b></p> <p>Show the field ONLY if: [conditions_post(13)] = '1'</p>                                        | Did the physician state in the notes whether the Abnormal liver enzymes diagnosis was due to PASC?           | <p>dropdown, Required</p> <table border="1"> <tr> <td>1</td> <td>Yes, the physician stated this condition was due to PASC</td> </tr> <tr> <td>2</td> <td>No, the physician stated that this condition was due to something other than PASC</td> </tr> <tr> <td>3</td> <td>Unknown/Not Available</td> </tr> </table> <p>Field Annotation: @HIDEBUTTON</p> | 1 | Yes, the physician stated this condition was due to PASC | 2 | No, the physician stated that this condition was due to something other than PASC | 3 | Unknown/Not Available |
| 1   | Yes, the physician stated this condition was due to PASC                                                                                 |                                                                                                              |                                                                                                                                                                                                                                                                                                                                                          |   |                                                          |   |                                                                                   |   |                       |
| 2   | No, the physician stated that this condition was due to something other than PASC                                                        |                                                                                                              |                                                                                                                                                                                                                                                                                                                                                          |   |                                                          |   |                                                                                   |   |                       |
| 3   | Unknown/Not Available                                                                                                                    |                                                                                                              |                                                                                                                                                                                                                                                                                                                                                          |   |                                                          |   |                                                                                   |   |                       |
| 220 | <p><b>liverenzy_diagnosis_pasc_y</b></p> <p>Show the field ONLY if: [conditions_post(13)] = '1' and [liverenzy_diagnosis_pasc] = '1'</p> | Copy and paste the language from the notes that states the Abnormal liver enzymes diagnosis was due to PASC: | <p>notes, Required</p> <p>Field Annotation: @HIDEBUTTON</p>                                                                                                                                                                                                                                                                                              |   |                                                          |   |                                                                                   |   |                       |
| 221 | <p><b>dysautonomia_date_followup</b></p> <p>Show the field ONLY if: [conditions_post(14)] = '1'</p>                                      | Enter the first Dysautonomia diagnosis date found during the follow-up period:                               | <p>text (date_mdy), Required</p> <p>Field Annotation: @HIDEBUTTON</p>                                                                                                                                                                                                                                                                                    |   |                                                          |   |                                                                                   |   |                       |
| 222 | <p><b>dysautonomia_date_followup_2</b></p> <p>Show the field ONLY if: [conditions_post(14)] = '1'</p>                                    | Enter the second Dysautonomia diagnosis date found during the follow-up period, if applicable:               | <p>text (date_mdy)</p> <p>Field Annotation: @HIDEBUTTON</p>                                                                                                                                                                                                                                                                                              |   |                                                          |   |                                                                                   |   |                       |
| 223 | <p><b>dysautonomia_endstatus</b></p> <p>Show the field ONLY if: [conditions_post(14)] = '1'</p>                                          | At the end of the follow-up period, the Dysautonomia was:                                                    | <p>dropdown, Required</p> <table border="1"> <tr> <td>1</td> <td>Resolved</td> </tr> <tr> <td>2</td> <td>Ongoing</td> </tr> <tr> <td>3</td> <td>Unknown/Unavailable</td> </tr> </table> <p>Field Annotation: @HIDEBUTTON</p>                                                                                                                             | 1 | Resolved                                                 | 2 | Ongoing                                                                           | 3 | Unknown/Unavailable   |
| 1   | Resolved                                                                                                                                 |                                                                                                              |                                                                                                                                                                                                                                                                                                                                                          |   |                                                          |   |                                                                                   |   |                       |
| 2   | Ongoing                                                                                                                                  |                                                                                                              |                                                                                                                                                                                                                                                                                                                                                          |   |                                                          |   |                                                                                   |   |                       |
| 3   | Unknown/Unavailable                                                                                                                      |                                                                                                              |                                                                                                                                                                                                                                                                                                                                                          |   |                                                          |   |                                                                                   |   |                       |
| 224 | <p><b>dysautonomia_diagnosis_pasc</b></p> <p>Show the field ONLY if: [conditions_post(14)] = '1'</p>                                     | Did the physician state in the notes whether the Dysautonomia diagnosis was due to PASC?                     | <p>dropdown, Required</p> <table border="1"> <tr> <td>1</td> <td>Yes, the physician stated this condition was due to PASC</td> </tr> <tr> <td>2</td> <td>No, the physician stated that this condition was due to something other than PASC</td> </tr> <tr> <td>3</td> <td>Unknown/Not Available</td> </tr> </table> <p>Field Annotation: @HIDEBUTTON</p> | 1 | Yes, the physician stated this condition was due to PASC | 2 | No, the physician stated that this condition was due to something other than PASC | 3 | Unknown/Not Available |
| 1   | Yes, the physician stated this condition was due to PASC                                                                                 |                                                                                                              |                                                                                                                                                                                                                                                                                                                                                          |   |                                                          |   |                                                                                   |   |                       |
| 2   | No, the physician stated that this condition was due to something other than PASC                                                        |                                                                                                              |                                                                                                                                                                                                                                                                                                                                                          |   |                                                          |   |                                                                                   |   |                       |
| 3   | Unknown/Not Available                                                                                                                    |                                                                                                              |                                                                                                                                                                                                                                                                                                                                                          |   |                                                          |   |                                                                                   |   |                       |
| 225 | <p><b>dysautonomia_diagnosis_pasc_y</b></p>                                                                                              | Copy and paste the language from the notes that states the Dysautonomia diagnosis was due to PASC:           | <p>notes, Required</p> <p>Field Annotation: @HIDEBUTTON</p>                                                                                                                                                                                                                                                                                              |   |                                                          |   |                                                                                   |   |                       |

|     |                                                                                                                                  |                                                                                                  |                                                                                                                                                                                                                                                                                                                                                  |   |                                                          |   |                                                                                   |   |                       |
|-----|----------------------------------------------------------------------------------------------------------------------------------|--------------------------------------------------------------------------------------------------|--------------------------------------------------------------------------------------------------------------------------------------------------------------------------------------------------------------------------------------------------------------------------------------------------------------------------------------------------|---|----------------------------------------------------------|---|-----------------------------------------------------------------------------------|---|-----------------------|
|     | Show the field ONLY if:<br>[conditions_post(14)] = '1' and [dysautonomia_diagnosis_pasc] = '1'                                   |                                                                                                  |                                                                                                                                                                                                                                                                                                                                                  |   |                                                          |   |                                                                                   |   |                       |
| 226 | <b>fatigue_date_followup</b><br><br>Show the field ONLY if:<br>[conditions_post(15)] = '1'                                       | Enter the first Fatigue diagnosis date found during the follow-up period:                        | text (date_mdy), Required<br>Field Annotation: @HIDEBUTTON                                                                                                                                                                                                                                                                                       |   |                                                          |   |                                                                                   |   |                       |
| 227 | <b>fatigue_date_followup_2</b><br><br>Show the field ONLY if:<br>[conditions_post(15)] = '1'                                     | Enter the second Fatigue diagnosis date found during the follow-up period, if applicable:        | text (date_mdy)<br>Field Annotation: @HIDEBUTTON                                                                                                                                                                                                                                                                                                 |   |                                                          |   |                                                                                   |   |                       |
| 228 | <b>fatigue_endstatus</b><br><br>Show the field ONLY if:<br>[conditions_post(15)] = '1'                                           | At the end of the follow-up period, the Fatigue was:                                             | dropdown, Required<br><table border="1"> <tr> <td>1</td> <td>Resolved</td> </tr> <tr> <td>2</td> <td>Ongoing</td> </tr> <tr> <td>3</td> <td>Unknown/Unavailable</td> </tr> </table><br>Field Annotation: @HIDEBUTTON                                                                                                                             | 1 | Resolved                                                 | 2 | Ongoing                                                                           | 3 | Unknown/Unavailable   |
| 1   | Resolved                                                                                                                         |                                                                                                  |                                                                                                                                                                                                                                                                                                                                                  |   |                                                          |   |                                                                                   |   |                       |
| 2   | Ongoing                                                                                                                          |                                                                                                  |                                                                                                                                                                                                                                                                                                                                                  |   |                                                          |   |                                                                                   |   |                       |
| 3   | Unknown/Unavailable                                                                                                              |                                                                                                  |                                                                                                                                                                                                                                                                                                                                                  |   |                                                          |   |                                                                                   |   |                       |
| 229 | <b>fatigue_diagnosis_pasc</b><br><br>Show the field ONLY if:<br>[conditions_post(15)] = '1'                                      | Did the physician state in the notes whether the Fatigue diagnosis was due to PASC?              | dropdown, Required<br><table border="1"> <tr> <td>1</td> <td>Yes, the physician stated this condition was due to PASC</td> </tr> <tr> <td>2</td> <td>No, the physician stated that this condition was due to something other than PASC</td> </tr> <tr> <td>3</td> <td>Unknown/Not Available</td> </tr> </table><br>Field Annotation: @HIDEBUTTON | 1 | Yes, the physician stated this condition was due to PASC | 2 | No, the physician stated that this condition was due to something other than PASC | 3 | Unknown/Not Available |
| 1   | Yes, the physician stated this condition was due to PASC                                                                         |                                                                                                  |                                                                                                                                                                                                                                                                                                                                                  |   |                                                          |   |                                                                                   |   |                       |
| 2   | No, the physician stated that this condition was due to something other than PASC                                                |                                                                                                  |                                                                                                                                                                                                                                                                                                                                                  |   |                                                          |   |                                                                                   |   |                       |
| 3   | Unknown/Not Available                                                                                                            |                                                                                                  |                                                                                                                                                                                                                                                                                                                                                  |   |                                                          |   |                                                                                   |   |                       |
| 230 | <b>fatigue_diagnosis_pasc_y</b><br><br>Show the field ONLY if:<br>[conditions_post(15)] = '1' and [fatigue_diagnosis_pasc] = '1' | Copy and paste the language from the notes that states the Fatigue diagnosis was due to PASC:    | notes, Required<br>Field Annotation: @HIDEBUTTON                                                                                                                                                                                                                                                                                                 |   |                                                          |   |                                                                                   |   |                       |
| 231 | <b>abdominal_date_followup</b><br><br>Show the field ONLY if:<br>[conditions_post(19)] = '1'                                     | Enter the first Abdominal pain diagnosis date found during the follow-up period:                 | text (date_mdy), Required<br>Field Annotation: @HIDEBUTTON                                                                                                                                                                                                                                                                                       |   |                                                          |   |                                                                                   |   |                       |
| 232 | <b>abdominal_date_followup_2</b><br><br>Show the field ONLY if:<br>[conditions_post(19)] = '1'                                   | Enter the second Abdominal pain diagnosis date found during the follow-up period, if applicable: | text (date_mdy)<br>Field Annotation: @HIDEBUTTON                                                                                                                                                                                                                                                                                                 |   |                                                          |   |                                                                                   |   |                       |

|            |                                                                                                                                              |                                                                                                              |                                                                                                                                                                                                                                                                                                                                                          |   |                                                          |   |                                                                                   |   |                       |
|------------|----------------------------------------------------------------------------------------------------------------------------------------------|--------------------------------------------------------------------------------------------------------------|----------------------------------------------------------------------------------------------------------------------------------------------------------------------------------------------------------------------------------------------------------------------------------------------------------------------------------------------------------|---|----------------------------------------------------------|---|-----------------------------------------------------------------------------------|---|-----------------------|
| <p>233</p> | <p><b>abdominal_endstatus</b></p> <p>Show the field ONLY if:<br/>[conditions_post(19)] = '1'</p>                                             | <p>At the end of the follow-up period, the Abdominal Pain was:</p>                                           | <p>dropdown, Required</p> <table border="1"> <tr> <td>1</td> <td>Resolved</td> </tr> <tr> <td>2</td> <td>Ongoing</td> </tr> <tr> <td>3</td> <td>Unknown/Unavailable</td> </tr> </table> <p>Field Annotation: @HIDEBUTTON</p>                                                                                                                             | 1 | Resolved                                                 | 2 | Ongoing                                                                           | 3 | Unknown/Unavailable   |
| 1          | Resolved                                                                                                                                     |                                                                                                              |                                                                                                                                                                                                                                                                                                                                                          |   |                                                          |   |                                                                                   |   |                       |
| 2          | Ongoing                                                                                                                                      |                                                                                                              |                                                                                                                                                                                                                                                                                                                                                          |   |                                                          |   |                                                                                   |   |                       |
| 3          | Unknown/Unavailable                                                                                                                          |                                                                                                              |                                                                                                                                                                                                                                                                                                                                                          |   |                                                          |   |                                                                                   |   |                       |
| <p>234</p> | <p><b>abdominal_diagnosis_pasc</b></p> <p>Show the field ONLY if:<br/>[conditions_post(19)] = '1'</p>                                        | <p>Did the physician state in the notes whether the Abdominal Pain diagnosis was due to PASC?</p>            | <p>dropdown, Required</p> <table border="1"> <tr> <td>1</td> <td>Yes, the physician stated this condition was due to PASC</td> </tr> <tr> <td>2</td> <td>No, the physician stated that this condition was due to something other than PASC</td> </tr> <tr> <td>3</td> <td>Unknown/Not Available</td> </tr> </table> <p>Field Annotation: @HIDEBUTTON</p> | 1 | Yes, the physician stated this condition was due to PASC | 2 | No, the physician stated that this condition was due to something other than PASC | 3 | Unknown/Not Available |
| 1          | Yes, the physician stated this condition was due to PASC                                                                                     |                                                                                                              |                                                                                                                                                                                                                                                                                                                                                          |   |                                                          |   |                                                                                   |   |                       |
| 2          | No, the physician stated that this condition was due to something other than PASC                                                            |                                                                                                              |                                                                                                                                                                                                                                                                                                                                                          |   |                                                          |   |                                                                                   |   |                       |
| 3          | Unknown/Not Available                                                                                                                        |                                                                                                              |                                                                                                                                                                                                                                                                                                                                                          |   |                                                          |   |                                                                                   |   |                       |
| <p>235</p> | <p><b>abdominal_diagnosis_pasc_y</b></p> <p>Show the field ONLY if:<br/>[conditions_post(19)] = '1' and [abdominal_diagnosis_pasc] = '1'</p> | <p>Copy and paste the language from the notes that states the Abdominal Pain diagnosis was due to PASC:</p>  | <p>notes, Required</p> <p>Field Annotation: @HIDEBUTTON</p>                                                                                                                                                                                                                                                                                              |   |                                                          |   |                                                                                   |   |                       |
| <p>236</p> | <p><b>aki_date_followup</b></p> <p>Show the field ONLY if:<br/>[conditions_post(20)] = '1'</p>                                               | <p>Enter the first Acute Kidney Injury diagnosis date found during the follow-up period:</p>                 | <p>text (date_mdy), Required</p> <p>Field Annotation: @HIDEBUTTON</p>                                                                                                                                                                                                                                                                                    |   |                                                          |   |                                                                                   |   |                       |
| <p>237</p> | <p><b>aki_date_followup_2</b></p> <p>Show the field ONLY if:<br/>[conditions_post(20)] = '1'</p>                                             | <p>Enter the second Acute Kidney Injury diagnosis date found during the follow-up period, if applicable:</p> | <p>text (date_mdy)</p> <p>Field Annotation: @HIDEBUTTON</p>                                                                                                                                                                                                                                                                                              |   |                                                          |   |                                                                                   |   |                       |
| <p>238</p> | <p><b>aki_endstatus</b></p> <p>Show the field ONLY if:<br/>[conditions_post(20)] = '1'</p>                                                   | <p>At the end of the follow-up period, the Acute Kidney Injury was:</p>                                      | <p>dropdown, Required</p> <table border="1"> <tr> <td>1</td> <td>Resolved</td> </tr> <tr> <td>2</td> <td>Ongoing</td> </tr> <tr> <td>3</td> <td>Unknown/Unavailable</td> </tr> </table> <p>Field Annotation: @HIDEBUTTON</p>                                                                                                                             | 1 | Resolved                                                 | 2 | Ongoing                                                                           | 3 | Unknown/Unavailable   |
| 1          | Resolved                                                                                                                                     |                                                                                                              |                                                                                                                                                                                                                                                                                                                                                          |   |                                                          |   |                                                                                   |   |                       |
| 2          | Ongoing                                                                                                                                      |                                                                                                              |                                                                                                                                                                                                                                                                                                                                                          |   |                                                          |   |                                                                                   |   |                       |
| 3          | Unknown/Unavailable                                                                                                                          |                                                                                                              |                                                                                                                                                                                                                                                                                                                                                          |   |                                                          |   |                                                                                   |   |                       |
| <p>239</p> | <p><b>aki_diagnosis_pasc</b></p> <p>Show the field ONLY if:<br/>[conditions_post(20)] = '1'</p>                                              | <p>Did the physician state in the notes whether the Acute Kidney Injury diagnosis was due to PASC?</p>       | <p>dropdown, Required</p> <table border="1"> <tr> <td>1</td> <td>Yes, the physician stated this condition was due to PASC</td> </tr> <tr> <td>2</td> <td>No, the physician stated that this condition was due to something other than PASC</td> </tr> <tr> <td>3</td> <td>Unknown/Not Available</td> </tr> </table>                                      | 1 | Yes, the physician stated this condition was due to PASC | 2 | No, the physician stated that this condition was due to something other than PASC | 3 | Unknown/Not Available |
| 1          | Yes, the physician stated this condition was due to PASC                                                                                     |                                                                                                              |                                                                                                                                                                                                                                                                                                                                                          |   |                                                          |   |                                                                                   |   |                       |
| 2          | No, the physician stated that this condition was due to something other than PASC                                                            |                                                                                                              |                                                                                                                                                                                                                                                                                                                                                          |   |                                                          |   |                                                                                   |   |                       |
| 3          | Unknown/Not Available                                                                                                                        |                                                                                                              |                                                                                                                                                                                                                                                                                                                                                          |   |                                                          |   |                                                                                   |   |                       |

|                                                                                                     |                                                                                                                              |                                                                                                                                                                                      |                                                                                                                                                                                                                                                                                                                                                                                                                                                                                                                                                                                                                                                                                                                           |   |                 |                  |              |                 |                   |   |                 |             |       |                 |                      |   |                 |                                          |   |                 |                                                                                      |   |                 |                                                                          |
|-----------------------------------------------------------------------------------------------------|------------------------------------------------------------------------------------------------------------------------------|--------------------------------------------------------------------------------------------------------------------------------------------------------------------------------------|---------------------------------------------------------------------------------------------------------------------------------------------------------------------------------------------------------------------------------------------------------------------------------------------------------------------------------------------------------------------------------------------------------------------------------------------------------------------------------------------------------------------------------------------------------------------------------------------------------------------------------------------------------------------------------------------------------------------------|---|-----------------|------------------|--------------|-----------------|-------------------|---|-----------------|-------------|-------|-----------------|----------------------|---|-----------------|------------------------------------------|---|-----------------|--------------------------------------------------------------------------------------|---|-----------------|--------------------------------------------------------------------------|
|                                                                                                     |                                                                                                                              |                                                                                                                                                                                      | Field Annotation: @HIDEBUTTON                                                                                                                                                                                                                                                                                                                                                                                                                                                                                                                                                                                                                                                                                             |   |                 |                  |              |                 |                   |   |                 |             |       |                 |                      |   |                 |                                          |   |                 |                                                                                      |   |                 |                                                                          |
| 240                                                                                                 | <p><b>aki_diagnosis_pasc_y</b></p> <p>Show the field ONLY if: [conditions_post(20)] = '1' and [aki_diagnosis_pasc] = '1'</p> | Copy and paste the language from the notes that states the Acute Kidney Injury diagnosis was due to PASC:                                                                            | notes, Required<br>Field Annotation: @HIDEBUTTON                                                                                                                                                                                                                                                                                                                                                                                                                                                                                                                                                                                                                                                                          |   |                 |                  |              |                 |                   |   |                 |             |       |                 |                      |   |                 |                                          |   |                 |                                                                                      |   |                 |                                                                          |
| 241                                                                                                 | <p><b>abnormal_lab</b></p> <p>Show the field ONLY if: [covid] = '1'</p>                                                      | <p>Did the patient have at least one occurrence of the following abnormal lab tests, on Day 28 or later after initial COVID-19 positive diagnosis?</p> <p>Select all that apply.</p> | checkbox, Required <table border="1"> <tr> <td>1</td> <td>abnormal_lab__1</td> <td>Thrombocytopenia</td> </tr> <tr> <td>2</td> <td>abnormal_lab__2</td> <td>Elevated Troponin</td> </tr> <tr> <td>3</td> <td>abnormal_lab__3</td> <td>Lymphopenia</td> </tr> <tr> <td>4</td> <td>abnormal_lab__4</td> <td>Elevated CRP</td> </tr> <tr> <td>5</td> <td>abnormal_lab__5</td> <td>The patient never had any of these tests</td> </tr> <tr> <td>6</td> <td>abnormal_lab__6</td> <td>The patient had a test but it was done prior to Day 28 post COVID positive diagnosis</td> </tr> <tr> <td>7</td> <td>abnormal_lab__7</td> <td>The patient had a test Day 28 or later, but the test results were normal</td> </tr> </table> | 1 | abnormal_lab__1 | Thrombocytopenia | 2            | abnormal_lab__2 | Elevated Troponin | 3 | abnormal_lab__3 | Lymphopenia | 4     | abnormal_lab__4 | Elevated CRP         | 5 | abnormal_lab__5 | The patient never had any of these tests | 6 | abnormal_lab__6 | The patient had a test but it was done prior to Day 28 post COVID positive diagnosis | 7 | abnormal_lab__7 | The patient had a test Day 28 or later, but the test results were normal |
| 1                                                                                                   | abnormal_lab__1                                                                                                              | Thrombocytopenia                                                                                                                                                                     |                                                                                                                                                                                                                                                                                                                                                                                                                                                                                                                                                                                                                                                                                                                           |   |                 |                  |              |                 |                   |   |                 |             |       |                 |                      |   |                 |                                          |   |                 |                                                                                      |   |                 |                                                                          |
| 2                                                                                                   | abnormal_lab__2                                                                                                              | Elevated Troponin                                                                                                                                                                    |                                                                                                                                                                                                                                                                                                                                                                                                                                                                                                                                                                                                                                                                                                                           |   |                 |                  |              |                 |                   |   |                 |             |       |                 |                      |   |                 |                                          |   |                 |                                                                                      |   |                 |                                                                          |
| 3                                                                                                   | abnormal_lab__3                                                                                                              | Lymphopenia                                                                                                                                                                          |                                                                                                                                                                                                                                                                                                                                                                                                                                                                                                                                                                                                                                                                                                                           |   |                 |                  |              |                 |                   |   |                 |             |       |                 |                      |   |                 |                                          |   |                 |                                                                                      |   |                 |                                                                          |
| 4                                                                                                   | abnormal_lab__4                                                                                                              | Elevated CRP                                                                                                                                                                         |                                                                                                                                                                                                                                                                                                                                                                                                                                                                                                                                                                                                                                                                                                                           |   |                 |                  |              |                 |                   |   |                 |             |       |                 |                      |   |                 |                                          |   |                 |                                                                                      |   |                 |                                                                          |
| 5                                                                                                   | abnormal_lab__5                                                                                                              | The patient never had any of these tests                                                                                                                                             |                                                                                                                                                                                                                                                                                                                                                                                                                                                                                                                                                                                                                                                                                                                           |   |                 |                  |              |                 |                   |   |                 |             |       |                 |                      |   |                 |                                          |   |                 |                                                                                      |   |                 |                                                                          |
| 6                                                                                                   | abnormal_lab__6                                                                                                              | The patient had a test but it was done prior to Day 28 post COVID positive diagnosis                                                                                                 |                                                                                                                                                                                                                                                                                                                                                                                                                                                                                                                                                                                                                                                                                                                           |   |                 |                  |              |                 |                   |   |                 |             |       |                 |                      |   |                 |                                          |   |                 |                                                                                      |   |                 |                                                                          |
| 7                                                                                                   | abnormal_lab__7                                                                                                              | The patient had a test Day 28 or later, but the test results were normal                                                                                                             |                                                                                                                                                                                                                                                                                                                                                                                                                                                                                                                                                                                                                                                                                                                           |   |                 |                  |              |                 |                   |   |                 |             |       |                 |                      |   |                 |                                          |   |                 |                                                                                      |   |                 |                                                                          |
| <p><b>Instrument: RECOVER Pediatric Chart Review Form (recover_pediatric_chart_review_form)</b></p> |                                                                                                                              |                                                                                                                                                                                      |                                                                                                                                                                                                                                                                                                                                                                                                                                                                                                                                                                                                                                                                                                                           |   |                 |                  |              |                 |                   |   |                 |             |       |                 |                      |   |                 |                                          |   |                 |                                                                                      |   |                 |                                                                          |
| 242                                                                                                 | <p><b>reason_thrombo_test</b></p> <p>Show the field ONLY if: [covid] = '1' and [abnormal_lab(1)] = '1'</p>                   | Select the reason why the patient was tested for Thrombocytopenia:                                                                                                                   | dropdown, Required <table border="1"> <tr><td>1</td><td>Symptomatic</td></tr> <tr><td>2</td><td>Asymptomatic</td></tr> <tr><td>3</td><td>Concern for PASC</td></tr> <tr><td>4</td><td>Exposed</td></tr> <tr><td>5</td><td>Other</td></tr> <tr><td>6</td><td>Unsure/Not Available</td></tr> </table>                                                                                                                                                                                                                                                                                                                                                                                                                       | 1 | Symptomatic     | 2                | Asymptomatic | 3               | Concern for PASC  | 4 | Exposed         | 5           | Other | 6               | Unsure/Not Available |   |                 |                                          |   |                 |                                                                                      |   |                 |                                                                          |
| 1                                                                                                   | Symptomatic                                                                                                                  |                                                                                                                                                                                      |                                                                                                                                                                                                                                                                                                                                                                                                                                                                                                                                                                                                                                                                                                                           |   |                 |                  |              |                 |                   |   |                 |             |       |                 |                      |   |                 |                                          |   |                 |                                                                                      |   |                 |                                                                          |
| 2                                                                                                   | Asymptomatic                                                                                                                 |                                                                                                                                                                                      |                                                                                                                                                                                                                                                                                                                                                                                                                                                                                                                                                                                                                                                                                                                           |   |                 |                  |              |                 |                   |   |                 |             |       |                 |                      |   |                 |                                          |   |                 |                                                                                      |   |                 |                                                                          |
| 3                                                                                                   | Concern for PASC                                                                                                             |                                                                                                                                                                                      |                                                                                                                                                                                                                                                                                                                                                                                                                                                                                                                                                                                                                                                                                                                           |   |                 |                  |              |                 |                   |   |                 |             |       |                 |                      |   |                 |                                          |   |                 |                                                                                      |   |                 |                                                                          |
| 4                                                                                                   | Exposed                                                                                                                      |                                                                                                                                                                                      |                                                                                                                                                                                                                                                                                                                                                                                                                                                                                                                                                                                                                                                                                                                           |   |                 |                  |              |                 |                   |   |                 |             |       |                 |                      |   |                 |                                          |   |                 |                                                                                      |   |                 |                                                                          |
| 5                                                                                                   | Other                                                                                                                        |                                                                                                                                                                                      |                                                                                                                                                                                                                                                                                                                                                                                                                                                                                                                                                                                                                                                                                                                           |   |                 |                  |              |                 |                   |   |                 |             |       |                 |                      |   |                 |                                          |   |                 |                                                                                      |   |                 |                                                                          |
| 6                                                                                                   | Unsure/Not Available                                                                                                         |                                                                                                                                                                                      |                                                                                                                                                                                                                                                                                                                                                                                                                                                                                                                                                                                                                                                                                                                           |   |                 |                  |              |                 |                   |   |                 |             |       |                 |                      |   |                 |                                          |   |                 |                                                                                      |   |                 |                                                                          |
| 243                                                                                                 | <p><b>date_thrombo_test</b></p> <p>Show the field ONLY if: [covid] = '1' and [abnormal_lab(1)] = '1'</p>                     | Enter the Thrombocytopenia test date:                                                                                                                                                | text (date_mdy), Required<br>Field Annotation: @HIDEBUTTON                                                                                                                                                                                                                                                                                                                                                                                                                                                                                                                                                                                                                                                                |   |                 |                  |              |                 |                   |   |                 |             |       |                 |                      |   |                 |                                          |   |                 |                                                                                      |   |                 |                                                                          |
| 244                                                                                                 | <p><b>reason_troponin_test</b></p> <p>Show the field ONLY if: [covid] = '1' and [abnormal_lab(2)] = '1'</p>                  | Select the reason why the patient was tested for Elevated Troponin:                                                                                                                  | dropdown, Required <table border="1"> <tr><td>1</td><td>Symptomatic</td></tr> <tr><td>2</td><td>Asymptomatic</td></tr> <tr><td>3</td><td>Concern for PASC</td></tr> <tr><td>4</td><td>Exposed</td></tr> <tr><td>5</td><td>Other</td></tr> </table>                                                                                                                                                                                                                                                                                                                                                                                                                                                                        | 1 | Symptomatic     | 2                | Asymptomatic | 3               | Concern for PASC  | 4 | Exposed         | 5           | Other |                 |                      |   |                 |                                          |   |                 |                                                                                      |   |                 |                                                                          |
| 1                                                                                                   | Symptomatic                                                                                                                  |                                                                                                                                                                                      |                                                                                                                                                                                                                                                                                                                                                                                                                                                                                                                                                                                                                                                                                                                           |   |                 |                  |              |                 |                   |   |                 |             |       |                 |                      |   |                 |                                          |   |                 |                                                                                      |   |                 |                                                                          |
| 2                                                                                                   | Asymptomatic                                                                                                                 |                                                                                                                                                                                      |                                                                                                                                                                                                                                                                                                                                                                                                                                                                                                                                                                                                                                                                                                                           |   |                 |                  |              |                 |                   |   |                 |             |       |                 |                      |   |                 |                                          |   |                 |                                                                                      |   |                 |                                                                          |
| 3                                                                                                   | Concern for PASC                                                                                                             |                                                                                                                                                                                      |                                                                                                                                                                                                                                                                                                                                                                                                                                                                                                                                                                                                                                                                                                                           |   |                 |                  |              |                 |                   |   |                 |             |       |                 |                      |   |                 |                                          |   |                 |                                                                                      |   |                 |                                                                          |
| 4                                                                                                   | Exposed                                                                                                                      |                                                                                                                                                                                      |                                                                                                                                                                                                                                                                                                                                                                                                                                                                                                                                                                                                                                                                                                                           |   |                 |                  |              |                 |                   |   |                 |             |       |                 |                      |   |                 |                                          |   |                 |                                                                                      |   |                 |                                                                          |
| 5                                                                                                   | Other                                                                                                                        |                                                                                                                                                                                      |                                                                                                                                                                                                                                                                                                                                                                                                                                                                                                                                                                                                                                                                                                                           |   |                 |                  |              |                 |                   |   |                 |             |       |                 |                      |   |                 |                                          |   |                 |                                                                                      |   |                 |                                                                          |

|     |                                                                                                                    |                                                                                                                                                                             |                                                                                                                                                                                                                                                                                                                                                                                                                                                                                                                                                                                                                                                           |   |                         |            |              |                         |                  |   |                         |       |       |                         |                                   |   |                         |          |   |                         |                |   |                         |                  |   |                         |                |
|-----|--------------------------------------------------------------------------------------------------------------------|-----------------------------------------------------------------------------------------------------------------------------------------------------------------------------|-----------------------------------------------------------------------------------------------------------------------------------------------------------------------------------------------------------------------------------------------------------------------------------------------------------------------------------------------------------------------------------------------------------------------------------------------------------------------------------------------------------------------------------------------------------------------------------------------------------------------------------------------------------|---|-------------------------|------------|--------------|-------------------------|------------------|---|-------------------------|-------|-------|-------------------------|-----------------------------------|---|-------------------------|----------|---|-------------------------|----------------|---|-------------------------|------------------|---|-------------------------|----------------|
|     |                                                                                                                    |                                                                                                                                                                             | 6   Unsure/Not Available                                                                                                                                                                                                                                                                                                                                                                                                                                                                                                                                                                                                                                  |   |                         |            |              |                         |                  |   |                         |       |       |                         |                                   |   |                         |          |   |                         |                |   |                         |                  |   |                         |                |
| 245 | <p><b>date_troponin_test</b></p> <p>Show the field ONLY if:<br/>[covid] = '1' and [abnormal_lab(2)] = '1'</p>      | Enter the Elevated Troponin test date:                                                                                                                                      | text (date_mdy), Required<br>Field Annotation: @HIDEBUTTON                                                                                                                                                                                                                                                                                                                                                                                                                                                                                                                                                                                                |   |                         |            |              |                         |                  |   |                         |       |       |                         |                                   |   |                         |          |   |                         |                |   |                         |                  |   |                         |                |
| 246 | <p><b>reason_lymphopenia_test</b></p> <p>Show the field ONLY if:<br/>[covid] = '1' and [abnormal_lab(3)] = '1'</p> | Select the reason why the patient was tested for Lymphopenia:                                                                                                               | dropdown, Required <table border="1"> <tr><td>1</td><td>Symptomatic</td></tr> <tr><td>2</td><td>Asymptomatic</td></tr> <tr><td>3</td><td>Concern for PASC</td></tr> <tr><td>4</td><td>Exposed</td></tr> <tr><td>5</td><td>Other</td></tr> <tr><td>6</td><td>Unsure/Not Available</td></tr> </table>                                                                                                                                                                                                                                                                                                                                                       | 1 | Symptomatic             | 2          | Asymptomatic | 3                       | Concern for PASC | 4 | Exposed                 | 5     | Other | 6                       | Unsure/Not Available              |   |                         |          |   |                         |                |   |                         |                  |   |                         |                |
| 1   | Symptomatic                                                                                                        |                                                                                                                                                                             |                                                                                                                                                                                                                                                                                                                                                                                                                                                                                                                                                                                                                                                           |   |                         |            |              |                         |                  |   |                         |       |       |                         |                                   |   |                         |          |   |                         |                |   |                         |                  |   |                         |                |
| 2   | Asymptomatic                                                                                                       |                                                                                                                                                                             |                                                                                                                                                                                                                                                                                                                                                                                                                                                                                                                                                                                                                                                           |   |                         |            |              |                         |                  |   |                         |       |       |                         |                                   |   |                         |          |   |                         |                |   |                         |                  |   |                         |                |
| 3   | Concern for PASC                                                                                                   |                                                                                                                                                                             |                                                                                                                                                                                                                                                                                                                                                                                                                                                                                                                                                                                                                                                           |   |                         |            |              |                         |                  |   |                         |       |       |                         |                                   |   |                         |          |   |                         |                |   |                         |                  |   |                         |                |
| 4   | Exposed                                                                                                            |                                                                                                                                                                             |                                                                                                                                                                                                                                                                                                                                                                                                                                                                                                                                                                                                                                                           |   |                         |            |              |                         |                  |   |                         |       |       |                         |                                   |   |                         |          |   |                         |                |   |                         |                  |   |                         |                |
| 5   | Other                                                                                                              |                                                                                                                                                                             |                                                                                                                                                                                                                                                                                                                                                                                                                                                                                                                                                                                                                                                           |   |                         |            |              |                         |                  |   |                         |       |       |                         |                                   |   |                         |          |   |                         |                |   |                         |                  |   |                         |                |
| 6   | Unsure/Not Available                                                                                               |                                                                                                                                                                             |                                                                                                                                                                                                                                                                                                                                                                                                                                                                                                                                                                                                                                                           |   |                         |            |              |                         |                  |   |                         |       |       |                         |                                   |   |                         |          |   |                         |                |   |                         |                  |   |                         |                |
| 247 | <p><b>date_lymphopenia_test</b></p> <p>Show the field ONLY if:<br/>[covid] = '1' and [abnormal_lab(3)] = '1'</p>   | Enter the Lymphopenia test date:                                                                                                                                            | text (date_mdy), Required<br>Field Annotation: @HIDEBUTTON                                                                                                                                                                                                                                                                                                                                                                                                                                                                                                                                                                                                |   |                         |            |              |                         |                  |   |                         |       |       |                         |                                   |   |                         |          |   |                         |                |   |                         |                  |   |                         |                |
| 248 | <p><b>reason_crp_test</b></p> <p>Show the field ONLY if:<br/>[covid] = '1' and [abnormal_lab(4)] = '1'</p>         | Select the reason why the patient was tested for Elevated CRP:                                                                                                              | dropdown, Required <table border="1"> <tr><td>1</td><td>Symptomatic</td></tr> <tr><td>2</td><td>Asymptomatic</td></tr> <tr><td>3</td><td>Concern for PASC</td></tr> <tr><td>4</td><td>Exposed</td></tr> <tr><td>5</td><td>Other</td></tr> <tr><td>6</td><td>Unsure/Not Available</td></tr> </table>                                                                                                                                                                                                                                                                                                                                                       | 1 | Symptomatic             | 2          | Asymptomatic | 3                       | Concern for PASC | 4 | Exposed                 | 5     | Other | 6                       | Unsure/Not Available              |   |                         |          |   |                         |                |   |                         |                  |   |                         |                |
| 1   | Symptomatic                                                                                                        |                                                                                                                                                                             |                                                                                                                                                                                                                                                                                                                                                                                                                                                                                                                                                                                                                                                           |   |                         |            |              |                         |                  |   |                         |       |       |                         |                                   |   |                         |          |   |                         |                |   |                         |                  |   |                         |                |
| 2   | Asymptomatic                                                                                                       |                                                                                                                                                                             |                                                                                                                                                                                                                                                                                                                                                                                                                                                                                                                                                                                                                                                           |   |                         |            |              |                         |                  |   |                         |       |       |                         |                                   |   |                         |          |   |                         |                |   |                         |                  |   |                         |                |
| 3   | Concern for PASC                                                                                                   |                                                                                                                                                                             |                                                                                                                                                                                                                                                                                                                                                                                                                                                                                                                                                                                                                                                           |   |                         |            |              |                         |                  |   |                         |       |       |                         |                                   |   |                         |          |   |                         |                |   |                         |                  |   |                         |                |
| 4   | Exposed                                                                                                            |                                                                                                                                                                             |                                                                                                                                                                                                                                                                                                                                                                                                                                                                                                                                                                                                                                                           |   |                         |            |              |                         |                  |   |                         |       |       |                         |                                   |   |                         |          |   |                         |                |   |                         |                  |   |                         |                |
| 5   | Other                                                                                                              |                                                                                                                                                                             |                                                                                                                                                                                                                                                                                                                                                                                                                                                                                                                                                                                                                                                           |   |                         |            |              |                         |                  |   |                         |       |       |                         |                                   |   |                         |          |   |                         |                |   |                         |                  |   |                         |                |
| 6   | Unsure/Not Available                                                                                               |                                                                                                                                                                             |                                                                                                                                                                                                                                                                                                                                                                                                                                                                                                                                                                                                                                                           |   |                         |            |              |                         |                  |   |                         |       |       |                         |                                   |   |                         |          |   |                         |                |   |                         |                  |   |                         |                |
| 249 | <p><b>date_crp_test</b></p> <p>Show the field ONLY if:<br/>[covid] = '1' and [abnormal_lab(4)] = '1'</p>           | Enter the Elevated CRP test date:                                                                                                                                           | text (date_mdy), Required<br>Field Annotation: @HIDEBUTTON                                                                                                                                                                                                                                                                                                                                                                                                                                                                                                                                                                                                |   |                         |            |              |                         |                  |   |                         |       |       |                         |                                   |   |                         |          |   |                         |                |   |                         |                  |   |                         |                |
| 250 | <p><b>diagnosis_post_covid</b></p> <p>Show the field ONLY if:<br/>[covid] = '1'</p>                                | <p>Did the patient have at least one occurrences of a diagnosis term for the following on Day 28 or later after COVID positive diagnosis?</p> <p>Select all that apply.</p> | checkbox <table border="1"> <tr><td>1</td><td>diagnosis_post_covid__1</td><td>Chest pain</td></tr> <tr><td>2</td><td>diagnosis_post_covid__2</td><td>Hair loss</td></tr> <tr><td>3</td><td>diagnosis_post_covid__3</td><td>Cough</td></tr> <tr><td>4</td><td>diagnosis_post_covid__4</td><td>Cardiorespirat signs and symptoms</td></tr> <tr><td>5</td><td>diagnosis_post_covid__5</td><td>Jaundice</td></tr> <tr><td>6</td><td>diagnosis_post_covid__6</td><td>Generalized p.</td></tr> <tr><td>7</td><td>diagnosis_post_covid__7</td><td>Anxiety symptoms</td></tr> <tr><td>8</td><td>diagnosis_post_covid__8</td><td>Fatigue/malâis</td></tr> </table> | 1 | diagnosis_post_covid__1 | Chest pain | 2            | diagnosis_post_covid__2 | Hair loss        | 3 | diagnosis_post_covid__3 | Cough | 4     | diagnosis_post_covid__4 | Cardiorespirat signs and symptoms | 5 | diagnosis_post_covid__5 | Jaundice | 6 | diagnosis_post_covid__6 | Generalized p. | 7 | diagnosis_post_covid__7 | Anxiety symptoms | 8 | diagnosis_post_covid__8 | Fatigue/malâis |
| 1   | diagnosis_post_covid__1                                                                                            | Chest pain                                                                                                                                                                  |                                                                                                                                                                                                                                                                                                                                                                                                                                                                                                                                                                                                                                                           |   |                         |            |              |                         |                  |   |                         |       |       |                         |                                   |   |                         |          |   |                         |                |   |                         |                  |   |                         |                |
| 2   | diagnosis_post_covid__2                                                                                            | Hair loss                                                                                                                                                                   |                                                                                                                                                                                                                                                                                                                                                                                                                                                                                                                                                                                                                                                           |   |                         |            |              |                         |                  |   |                         |       |       |                         |                                   |   |                         |          |   |                         |                |   |                         |                  |   |                         |                |
| 3   | diagnosis_post_covid__3                                                                                            | Cough                                                                                                                                                                       |                                                                                                                                                                                                                                                                                                                                                                                                                                                                                                                                                                                                                                                           |   |                         |            |              |                         |                  |   |                         |       |       |                         |                                   |   |                         |          |   |                         |                |   |                         |                  |   |                         |                |
| 4   | diagnosis_post_covid__4                                                                                            | Cardiorespirat signs and symptoms                                                                                                                                           |                                                                                                                                                                                                                                                                                                                                                                                                                                                                                                                                                                                                                                                           |   |                         |            |              |                         |                  |   |                         |       |       |                         |                                   |   |                         |          |   |                         |                |   |                         |                  |   |                         |                |
| 5   | diagnosis_post_covid__5                                                                                            | Jaundice                                                                                                                                                                    |                                                                                                                                                                                                                                                                                                                                                                                                                                                                                                                                                                                                                                                           |   |                         |            |              |                         |                  |   |                         |       |       |                         |                                   |   |                         |          |   |                         |                |   |                         |                  |   |                         |                |
| 6   | diagnosis_post_covid__6                                                                                            | Generalized p.                                                                                                                                                              |                                                                                                                                                                                                                                                                                                                                                                                                                                                                                                                                                                                                                                                           |   |                         |            |              |                         |                  |   |                         |       |       |                         |                                   |   |                         |          |   |                         |                |   |                         |                  |   |                         |                |
| 7   | diagnosis_post_covid__7                                                                                            | Anxiety symptoms                                                                                                                                                            |                                                                                                                                                                                                                                                                                                                                                                                                                                                                                                                                                                                                                                                           |   |                         |            |              |                         |                  |   |                         |       |       |                         |                                   |   |                         |          |   |                         |                |   |                         |                  |   |                         |                |
| 8   | diagnosis_post_covid__8                                                                                            | Fatigue/malâis                                                                                                                                                              |                                                                                                                                                                                                                                                                                                                                                                                                                                                                                                                                                                                                                                                           |   |                         |            |              |                         |                  |   |                         |       |       |                         |                                   |   |                         |          |   |                         |                |   |                         |                  |   |                         |                |

|     |                                                                                                                    |                                                                                                        |                                                                                                                                                                                                                                                                                                                                                                                                                                                                                                                                                                                                           |   |                                                          |          |                                                                                   |                          |                       |    |                          |             |    |                          |          |    |                          |                   |    |                          |                                                                                                        |
|-----|--------------------------------------------------------------------------------------------------------------------|--------------------------------------------------------------------------------------------------------|-----------------------------------------------------------------------------------------------------------------------------------------------------------------------------------------------------------------------------------------------------------------------------------------------------------------------------------------------------------------------------------------------------------------------------------------------------------------------------------------------------------------------------------------------------------------------------------------------------------|---|----------------------------------------------------------|----------|-----------------------------------------------------------------------------------|--------------------------|-----------------------|----|--------------------------|-------------|----|--------------------------|----------|----|--------------------------|-------------------|----|--------------------------|--------------------------------------------------------------------------------------------------------|
|     |                                                                                                                    |                                                                                                        | <table border="1"> <tr> <td>9</td> <td>diagnosis_post_covid__9</td> <td>Diarrhea</td> </tr> <tr> <td>10</td> <td>diagnosis_post_covid__10</td> <td>Fever/chills</td> </tr> <tr> <td>11</td> <td>diagnosis_post_covid__11</td> <td>Skin rashes</td> </tr> <tr> <td>12</td> <td>diagnosis_post_covid__12</td> <td>Headache</td> </tr> <tr> <td>13</td> <td>diagnosis_post_covid__13</td> <td>None of the above</td> </tr> <tr> <td>14</td> <td>diagnosis_post_covid__14</td> <td>The patient has a condition listed above but it occurred prior to Day 28 post COVID positive diagnosis</td> </tr> </table> | 9 | diagnosis_post_covid__9                                  | Diarrhea | 10                                                                                | diagnosis_post_covid__10 | Fever/chills          | 11 | diagnosis_post_covid__11 | Skin rashes | 12 | diagnosis_post_covid__12 | Headache | 13 | diagnosis_post_covid__13 | None of the above | 14 | diagnosis_post_covid__14 | The patient has a condition listed above but it occurred prior to Day 28 post COVID positive diagnosis |
| 9   | diagnosis_post_covid__9                                                                                            | Diarrhea                                                                                               |                                                                                                                                                                                                                                                                                                                                                                                                                                                                                                                                                                                                           |   |                                                          |          |                                                                                   |                          |                       |    |                          |             |    |                          |          |    |                          |                   |    |                          |                                                                                                        |
| 10  | diagnosis_post_covid__10                                                                                           | Fever/chills                                                                                           |                                                                                                                                                                                                                                                                                                                                                                                                                                                                                                                                                                                                           |   |                                                          |          |                                                                                   |                          |                       |    |                          |             |    |                          |          |    |                          |                   |    |                          |                                                                                                        |
| 11  | diagnosis_post_covid__11                                                                                           | Skin rashes                                                                                            |                                                                                                                                                                                                                                                                                                                                                                                                                                                                                                                                                                                                           |   |                                                          |          |                                                                                   |                          |                       |    |                          |             |    |                          |          |    |                          |                   |    |                          |                                                                                                        |
| 12  | diagnosis_post_covid__12                                                                                           | Headache                                                                                               |                                                                                                                                                                                                                                                                                                                                                                                                                                                                                                                                                                                                           |   |                                                          |          |                                                                                   |                          |                       |    |                          |             |    |                          |          |    |                          |                   |    |                          |                                                                                                        |
| 13  | diagnosis_post_covid__13                                                                                           | None of the above                                                                                      |                                                                                                                                                                                                                                                                                                                                                                                                                                                                                                                                                                                                           |   |                                                          |          |                                                                                   |                          |                       |    |                          |             |    |                          |          |    |                          |                   |    |                          |                                                                                                        |
| 14  | diagnosis_post_covid__14                                                                                           | The patient has a condition listed above but it occurred prior to Day 28 post COVID positive diagnosis |                                                                                                                                                                                                                                                                                                                                                                                                                                                                                                                                                                                                           |   |                                                          |          |                                                                                   |                          |                       |    |                          |             |    |                          |          |    |                          |                   |    |                          |                                                                                                        |
| 251 | <p><b>cardiorespiratory</b></p> <p>Show the field ONLY if: [diagnosis_post_covid(4)] = '1'</p>                     | Describe or list the relevant cardiorespiratory signs and symptoms:                                    | notes, Required                                                                                                                                                                                                                                                                                                                                                                                                                                                                                                                                                                                           |   |                                                          |          |                                                                                   |                          |                       |    |                          |             |    |                          |          |    |                          |                   |    |                          |                                                                                                        |
| 252 | <p><b>chestpain_date</b></p> <p>Show the field ONLY if: [covid] = '1' and [diagnosis_post_covid(1)] = '1'</p>      | Enter the date of the initial Chest Pain diagnosis:                                                    | text (date_mdy), Required<br>Field Annotation: @HIDEBUTTON                                                                                                                                                                                                                                                                                                                                                                                                                                                                                                                                                |   |                                                          |          |                                                                                   |                          |                       |    |                          |             |    |                          |          |    |                          |                   |    |                          |                                                                                                        |
| 253 | <p><b>chestpain_date_2</b></p> <p>Show the field ONLY if: [covid] = '1' and [diagnosis_post_covid(1)] = '1'</p>    | Enter the date of the second Chest Pain diagnosis, if applicable:                                      | text (date_mdy)<br>Field Annotation: @HIDEBUTTON                                                                                                                                                                                                                                                                                                                                                                                                                                                                                                                                                          |   |                                                          |          |                                                                                   |                          |                       |    |                          |             |    |                          |          |    |                          |                   |    |                          |                                                                                                        |
| 254 | <p><b>chestpain_endstatus</b></p> <p>Show the field ONLY if: [covid] = '1' and [diagnosis_post_covid(1)] = '1'</p> | At the end of the follow-up period, the Chest Pain was:                                                | dropdown, Required <table border="1"> <tr> <td>1</td> <td>Resolved</td> </tr> <tr> <td>2</td> <td>Ongoing</td> </tr> <tr> <td>3</td> <td>Unknown/Unavailable</td> </tr> </table> Field Annotation: @HIDEBUTTON                                                                                                                                                                                                                                                                                                                                                                                            | 1 | Resolved                                                 | 2        | Ongoing                                                                           | 3                        | Unknown/Unavailable   |    |                          |             |    |                          |          |    |                          |                   |    |                          |                                                                                                        |
| 1   | Resolved                                                                                                           |                                                                                                        |                                                                                                                                                                                                                                                                                                                                                                                                                                                                                                                                                                                                           |   |                                                          |          |                                                                                   |                          |                       |    |                          |             |    |                          |          |    |                          |                   |    |                          |                                                                                                        |
| 2   | Ongoing                                                                                                            |                                                                                                        |                                                                                                                                                                                                                                                                                                                                                                                                                                                                                                                                                                                                           |   |                                                          |          |                                                                                   |                          |                       |    |                          |             |    |                          |          |    |                          |                   |    |                          |                                                                                                        |
| 3   | Unknown/Unavailable                                                                                                |                                                                                                        |                                                                                                                                                                                                                                                                                                                                                                                                                                                                                                                                                                                                           |   |                                                          |          |                                                                                   |                          |                       |    |                          |             |    |                          |          |    |                          |                   |    |                          |                                                                                                        |
| 255 | <p><b>chestpain_pasc</b></p> <p>Show the field ONLY if: [covid] = '1' and [diagnosis_post_covid(1)] = '1'</p>      | Did the physician state in the notes whether the Chest Pain was related to PASC?                       | dropdown, Required <table border="1"> <tr> <td>1</td> <td>Yes, the physician stated this condition was due to PASC</td> </tr> <tr> <td>2</td> <td>No, the physician stated that this condition was due to something other than PASC</td> </tr> <tr> <td>3</td> <td>Unknown/Not Available</td> </tr> </table> Field Annotation: @HIDEBUTTON                                                                                                                                                                                                                                                                | 1 | Yes, the physician stated this condition was due to PASC | 2        | No, the physician stated that this condition was due to something other than PASC | 3                        | Unknown/Not Available |    |                          |             |    |                          |          |    |                          |                   |    |                          |                                                                                                        |
| 1   | Yes, the physician stated this condition was due to PASC                                                           |                                                                                                        |                                                                                                                                                                                                                                                                                                                                                                                                                                                                                                                                                                                                           |   |                                                          |          |                                                                                   |                          |                       |    |                          |             |    |                          |          |    |                          |                   |    |                          |                                                                                                        |
| 2   | No, the physician stated that this condition was due to something other than PASC                                  |                                                                                                        |                                                                                                                                                                                                                                                                                                                                                                                                                                                                                                                                                                                                           |   |                                                          |          |                                                                                   |                          |                       |    |                          |             |    |                          |          |    |                          |                   |    |                          |                                                                                                        |
| 3   | Unknown/Not Available                                                                                              |                                                                                                        |                                                                                                                                                                                                                                                                                                                                                                                                                                                                                                                                                                                                           |   |                                                          |          |                                                                                   |                          |                       |    |                          |             |    |                          |          |    |                          |                   |    |                          |                                                                                                        |
| 256 | <p><b>chestpain_pasc_y</b></p> <p>Show the field ONLY if: [covid] = '1' and [diagnosis</p>                         | Copy and paste the language from the notes that states the Chest Pain diagnosis was related to PASC:   | notes, Required<br>Field Annotation: @HIDEBUTTON                                                                                                                                                                                                                                                                                                                                                                                                                                                                                                                                                          |   |                                                          |          |                                                                                   |                          |                       |    |                          |             |    |                          |          |    |                          |                   |    |                          |                                                                                                        |

|     |                                                                                                                                  |                                                                                                     |                                                                                                                                                                                                                                                                                                                                         |   |                                                          |   |                                                                                   |   |                       |
|-----|----------------------------------------------------------------------------------------------------------------------------------|-----------------------------------------------------------------------------------------------------|-----------------------------------------------------------------------------------------------------------------------------------------------------------------------------------------------------------------------------------------------------------------------------------------------------------------------------------------|---|----------------------------------------------------------|---|-----------------------------------------------------------------------------------|---|-----------------------|
|     | is_post_covid(1) = '1' and<br>d [chestpain_pasc] = '1'                                                                           |                                                                                                     |                                                                                                                                                                                                                                                                                                                                         |   |                                                          |   |                                                                                   |   |                       |
| 257 | <b>hairloss_date</b><br>Show the field ONLY if:<br>[covid] = '1' and [diagnosis_post_covid(2)] = '1'                             | Enter the date of the initial Hair Loss diagnosis:                                                  | text (date_mdy), Required<br>Field Annotation: @HIDEBUTTON                                                                                                                                                                                                                                                                              |   |                                                          |   |                                                                                   |   |                       |
| 258 | <b>hairloss_date_2</b><br>Show the field ONLY if:<br>[covid] = '1' and [diagnosis_post_covid(2)] = '1'                           | Enter the date of the second Hair Loss diagnosis, if applicable:                                    | text (date_mdy)<br>Field Annotation: @HIDEBUTTON                                                                                                                                                                                                                                                                                        |   |                                                          |   |                                                                                   |   |                       |
| 259 | <b>hairloss_endstatus</b><br>Show the field ONLY if:<br>[covid] = '1' and [diagnosis_post_covid(2)] = '1'                        | At the end of the follow-up period, the Hair Loss was:                                              | dropdown, Required<br><table border="1"> <tr><td>1</td><td>Resolved</td></tr> <tr><td>2</td><td>Ongoing</td></tr> <tr><td>3</td><td>Unknown/Unavailable</td></tr> </table><br>Field Annotation: @HIDEBUTTON                                                                                                                             | 1 | Resolved                                                 | 2 | Ongoing                                                                           | 3 | Unknown/Unavailable   |
| 1   | Resolved                                                                                                                         |                                                                                                     |                                                                                                                                                                                                                                                                                                                                         |   |                                                          |   |                                                                                   |   |                       |
| 2   | Ongoing                                                                                                                          |                                                                                                     |                                                                                                                                                                                                                                                                                                                                         |   |                                                          |   |                                                                                   |   |                       |
| 3   | Unknown/Unavailable                                                                                                              |                                                                                                     |                                                                                                                                                                                                                                                                                                                                         |   |                                                          |   |                                                                                   |   |                       |
| 260 | <b>hairloss_pasc</b><br>Show the field ONLY if:<br>[covid] = '1' and [diagnosis_post_covid(2)] = '1'                             | Did the physician state in the notes whether the Hair Loss was related to PASC?                     | dropdown, Required<br><table border="1"> <tr><td>1</td><td>Yes, the physician stated this condition was due to PASC</td></tr> <tr><td>2</td><td>No, the physician stated that this condition was due to something other than PASC</td></tr> <tr><td>3</td><td>Unknown/Not Available</td></tr> </table><br>Field Annotation: @HIDEBUTTON | 1 | Yes, the physician stated this condition was due to PASC | 2 | No, the physician stated that this condition was due to something other than PASC | 3 | Unknown/Not Available |
| 1   | Yes, the physician stated this condition was due to PASC                                                                         |                                                                                                     |                                                                                                                                                                                                                                                                                                                                         |   |                                                          |   |                                                                                   |   |                       |
| 2   | No, the physician stated that this condition was due to something other than PASC                                                |                                                                                                     |                                                                                                                                                                                                                                                                                                                                         |   |                                                          |   |                                                                                   |   |                       |
| 3   | Unknown/Not Available                                                                                                            |                                                                                                     |                                                                                                                                                                                                                                                                                                                                         |   |                                                          |   |                                                                                   |   |                       |
| 261 | <b>hairloss_pasc_y</b><br>Show the field ONLY if:<br>[covid] = '1' and [diagnosis_post_covid(2)] = '1' and [hairloss_pasc] = '1' | Copy and paste the language from the notes that states the Hair Loss diagnosis was related to PASC: | notes, Required<br>Field Annotation: @HIDEBUTTON                                                                                                                                                                                                                                                                                        |   |                                                          |   |                                                                                   |   |                       |
| 262 | <b>cough_date</b><br>Show the field ONLY if:<br>[covid] = '1' and [diagnosis_post_covid(3)] = '1'                                | Enter the date of the initial Cough diagnosis:                                                      | text (date_mdy), Required<br>Field Annotation: @HIDEBUTTON                                                                                                                                                                                                                                                                              |   |                                                          |   |                                                                                   |   |                       |
| 263 | <b>cough_date_2</b><br>Show the field ONLY if:<br>[covid] = '1' and [diagnosis_post_covid(3)] = '1'                              | Enter the date of the second Cough diagnosis, if applicable:                                        | text (date_mdy)<br>Field Annotation: @HIDEBUTTON                                                                                                                                                                                                                                                                                        |   |                                                          |   |                                                                                   |   |                       |
| 264 | <b>cough_endstatus</b><br>Show the field ONLY if:<br>[covid] = '1' and [diagnosis_post_covid(3)] = '1'                           | At the end of the follow-up period, the Cough was:                                                  | dropdown, Required<br><table border="1"> <tr><td>1</td><td>Resolved</td></tr> <tr><td>2</td><td>Ongoing</td></tr> <tr><td>3</td><td>Unknown/Unavailable</td></tr> </table>                                                                                                                                                              | 1 | Resolved                                                 | 2 | Ongoing                                                                           | 3 | Unknown/Unavailable   |
| 1   | Resolved                                                                                                                         |                                                                                                     |                                                                                                                                                                                                                                                                                                                                         |   |                                                          |   |                                                                                   |   |                       |
| 2   | Ongoing                                                                                                                          |                                                                                                     |                                                                                                                                                                                                                                                                                                                                         |   |                                                          |   |                                                                                   |   |                       |
| 3   | Unknown/Unavailable                                                                                                              |                                                                                                     |                                                                                                                                                                                                                                                                                                                                         |   |                                                          |   |                                                                                   |   |                       |

|     |                                                                                                                                                  |                                                                                                                       |                                                                                                                                                                                                                                                                                                                                                          |   |                                                          |   |                                                                                   |   |                       |
|-----|--------------------------------------------------------------------------------------------------------------------------------------------------|-----------------------------------------------------------------------------------------------------------------------|----------------------------------------------------------------------------------------------------------------------------------------------------------------------------------------------------------------------------------------------------------------------------------------------------------------------------------------------------------|---|----------------------------------------------------------|---|-----------------------------------------------------------------------------------|---|-----------------------|
|     |                                                                                                                                                  |                                                                                                                       | Field Annotation: @HIDEBUTTON                                                                                                                                                                                                                                                                                                                            |   |                                                          |   |                                                                                   |   |                       |
| 265 | <p><b>cough_pasc</b></p> <p>Show the field ONLY if:<br/>[covid] = '1' and [diagnosis_post_covid(3)] = '1'</p>                                    | Did the physician state in the notes whether the Cough was related to PASC?                                           | <p>dropdown, Required</p> <table border="1"> <tr> <td>1</td> <td>Yes, the physician stated this condition was due to PASC</td> </tr> <tr> <td>2</td> <td>No, the physician stated that this condition was due to something other than PASC</td> </tr> <tr> <td>3</td> <td>Unknown/Not Available</td> </tr> </table> <p>Field Annotation: @HIDEBUTTON</p> | 1 | Yes, the physician stated this condition was due to PASC | 2 | No, the physician stated that this condition was due to something other than PASC | 3 | Unknown/Not Available |
| 1   | Yes, the physician stated this condition was due to PASC                                                                                         |                                                                                                                       |                                                                                                                                                                                                                                                                                                                                                          |   |                                                          |   |                                                                                   |   |                       |
| 2   | No, the physician stated that this condition was due to something other than PASC                                                                |                                                                                                                       |                                                                                                                                                                                                                                                                                                                                                          |   |                                                          |   |                                                                                   |   |                       |
| 3   | Unknown/Not Available                                                                                                                            |                                                                                                                       |                                                                                                                                                                                                                                                                                                                                                          |   |                                                          |   |                                                                                   |   |                       |
| 266 | <p><b>cough_pasc_y</b></p> <p>Show the field ONLY if:<br/>[covid] = '1' and [diagnosis_post_covid(3)] = '1' and [cough_pasc] = '1'</p>           | Copy and paste the language from the notes that states the Cough diagnosis was related to PASC:                       | <p>notes, Required</p> <p>Field Annotation: @HIDEBUTTON</p>                                                                                                                                                                                                                                                                                              |   |                                                          |   |                                                                                   |   |                       |
| 267 | <p><b>cardio_signs_date</b></p> <p>Show the field ONLY if:<br/>[covid] = '1' and [diagnosis_post_covid(4)] = '1'</p>                             | Enter the date of the initial Cardiorespiratory signs and symptoms:                                                   | <p>text (date_mdy), Required</p> <p>Field Annotation: @HIDEBUTTON</p>                                                                                                                                                                                                                                                                                    |   |                                                          |   |                                                                                   |   |                       |
| 268 | <p><b>cardio_signs_date_2</b></p> <p>Show the field ONLY if:<br/>[covid] = '1' and [diagnosis_post_covid(4)] = '1'</p>                           | Enter the date of the second Cardiorespiratory signs and symptoms, if applicable:                                     | <p>text (date_mdy)</p> <p>Field Annotation: @HIDEBUTTON</p>                                                                                                                                                                                                                                                                                              |   |                                                          |   |                                                                                   |   |                       |
| 269 | <p><b>cardioresp_endstatus</b></p> <p>Show the field ONLY if:<br/>[covid] = '1' and [diagnosis_post_covid(4)] = '1'</p>                          | At the end of the follow-up period, the Cardiorespiratory signs and symptoms were:                                    | <p>dropdown, Required</p> <table border="1"> <tr> <td>1</td> <td>Resolved</td> </tr> <tr> <td>2</td> <td>Ongoing</td> </tr> <tr> <td>3</td> <td>Unknown/Unavailable</td> </tr> </table> <p>Field Annotation: @HIDEBUTTON</p>                                                                                                                             | 1 | Resolved                                                 | 2 | Ongoing                                                                           | 3 | Unknown/Unavailable   |
| 1   | Resolved                                                                                                                                         |                                                                                                                       |                                                                                                                                                                                                                                                                                                                                                          |   |                                                          |   |                                                                                   |   |                       |
| 2   | Ongoing                                                                                                                                          |                                                                                                                       |                                                                                                                                                                                                                                                                                                                                                          |   |                                                          |   |                                                                                   |   |                       |
| 3   | Unknown/Unavailable                                                                                                                              |                                                                                                                       |                                                                                                                                                                                                                                                                                                                                                          |   |                                                          |   |                                                                                   |   |                       |
| 270 | <p><b>cardioresp_pasc</b></p> <p>Show the field ONLY if:<br/>[covid] = '1' and [diagnosis_post_covid(4)] = '1'</p>                               | Did the physician state in the notes whether the Cardiorespiratory signs and symptoms were related to PASC?           | <p>dropdown, Required</p> <table border="1"> <tr> <td>1</td> <td>Yes, the physician stated this condition was due to PASC</td> </tr> <tr> <td>2</td> <td>No, the physician stated that this condition was due to something other than PASC</td> </tr> <tr> <td>3</td> <td>Unknown/Not Available</td> </tr> </table> <p>Field Annotation: @HIDEBUTTON</p> | 1 | Yes, the physician stated this condition was due to PASC | 2 | No, the physician stated that this condition was due to something other than PASC | 3 | Unknown/Not Available |
| 1   | Yes, the physician stated this condition was due to PASC                                                                                         |                                                                                                                       |                                                                                                                                                                                                                                                                                                                                                          |   |                                                          |   |                                                                                   |   |                       |
| 2   | No, the physician stated that this condition was due to something other than PASC                                                                |                                                                                                                       |                                                                                                                                                                                                                                                                                                                                                          |   |                                                          |   |                                                                                   |   |                       |
| 3   | Unknown/Not Available                                                                                                                            |                                                                                                                       |                                                                                                                                                                                                                                                                                                                                                          |   |                                                          |   |                                                                                   |   |                       |
| 271 | <p><b>cardioresp_pasc_y</b></p> <p>Show the field ONLY if:<br/>[covid] = '1' and [diagnosis_post_covid(4)] = '1' and [cardioresp_pasc] = '1'</p> | Copy and paste the language from the notes that states the Cardiorespiratory signs and symptoms were related to PASC: | <p>notes, Required</p> <p>Field Annotation: @HIDEBUTTON</p>                                                                                                                                                                                                                                                                                              |   |                                                          |   |                                                                                   |   |                       |

|     |                                                                                                                                              |                                                                                          |                                                                                                                                                                                                                                                                                                                                      |   |                                                          |   |                                                                                   |   |                       |
|-----|----------------------------------------------------------------------------------------------------------------------------------------------|------------------------------------------------------------------------------------------|--------------------------------------------------------------------------------------------------------------------------------------------------------------------------------------------------------------------------------------------------------------------------------------------------------------------------------------|---|----------------------------------------------------------|---|-----------------------------------------------------------------------------------|---|-----------------------|
| 272 | <p><b>jaundice_date</b></p> <p>Show the field ONLY if:<br/>[covid] = '1' and [diagnosis_post_covid(5)] = '1'</p>                             | Enter the date of the initial Jaundice diagnosis:                                        | text (date_mdy), Required<br>Field Annotation: @HIDEBUTTON                                                                                                                                                                                                                                                                           |   |                                                          |   |                                                                                   |   |                       |
| 273 | <p><b>jaundice_date_2</b></p> <p>Show the field ONLY if:<br/>[covid] = '1' and [diagnosis_post_covid(5)] = '1'</p>                           | Enter the date of the second Jaundice diagnosis, if applicable:                          | text (date_mdy)<br>Field Annotation: @HIDEBUTTON                                                                                                                                                                                                                                                                                     |   |                                                          |   |                                                                                   |   |                       |
| 274 | <p><b>jaundice_endstatus</b></p> <p>Show the field ONLY if:<br/>[covid] = '1' and [diagnosis_post_covid(5)] = '1'</p>                        | At the end of the follow-up period, the Jaundice was:                                    | dropdown, Required<br><table border="1"> <tr><td>1</td><td>Resolved</td></tr> <tr><td>2</td><td>Ongoing</td></tr> <tr><td>3</td><td>Unknown/Unavailable</td></tr> </table> Field Annotation: @HIDEBUTTON                                                                                                                             | 1 | Resolved                                                 | 2 | Ongoing                                                                           | 3 | Unknown/Unavailable   |
| 1   | Resolved                                                                                                                                     |                                                                                          |                                                                                                                                                                                                                                                                                                                                      |   |                                                          |   |                                                                                   |   |                       |
| 2   | Ongoing                                                                                                                                      |                                                                                          |                                                                                                                                                                                                                                                                                                                                      |   |                                                          |   |                                                                                   |   |                       |
| 3   | Unknown/Unavailable                                                                                                                          |                                                                                          |                                                                                                                                                                                                                                                                                                                                      |   |                                                          |   |                                                                                   |   |                       |
| 275 | <p><b>jaundice_pasc</b></p> <p>Show the field ONLY if:<br/>[covid] = '1' and [diagnosis_post_covid(5)] = '1'</p>                             | Did the physician state in the notes whether the Jaundice was related to PASC?           | dropdown, Required<br><table border="1"> <tr><td>1</td><td>Yes, the physician stated this condition was due to PASC</td></tr> <tr><td>2</td><td>No, the physician stated that this condition was due to something other than PASC</td></tr> <tr><td>3</td><td>Unknown/Not Available</td></tr> </table> Field Annotation: @HIDEBUTTON | 1 | Yes, the physician stated this condition was due to PASC | 2 | No, the physician stated that this condition was due to something other than PASC | 3 | Unknown/Not Available |
| 1   | Yes, the physician stated this condition was due to PASC                                                                                     |                                                                                          |                                                                                                                                                                                                                                                                                                                                      |   |                                                          |   |                                                                                   |   |                       |
| 2   | No, the physician stated that this condition was due to something other than PASC                                                            |                                                                                          |                                                                                                                                                                                                                                                                                                                                      |   |                                                          |   |                                                                                   |   |                       |
| 3   | Unknown/Not Available                                                                                                                        |                                                                                          |                                                                                                                                                                                                                                                                                                                                      |   |                                                          |   |                                                                                   |   |                       |
| 276 | <p><b>jaundice_pasc_y</b></p> <p>Show the field ONLY if:<br/>[covid] = '1' and [diagnosis_post_covid(5)] = '1' and [jaundice_pasc] = '1'</p> | Copy and paste the language from the notes that states the Jaundice was related to PASC: | notes, Required<br>Field Annotation: @HIDEBUTTON                                                                                                                                                                                                                                                                                     |   |                                                          |   |                                                                                   |   |                       |
| 277 | <p><b>pain_date</b></p> <p>Show the field ONLY if:<br/>[covid] = '1' and [diagnosis_post_covid(6)] = '1'</p>                                 | Enter the date of the initial Generalized Pain diagnosis:                                | text (date_mdy), Required<br>Field Annotation: @HIDEBUTTON                                                                                                                                                                                                                                                                           |   |                                                          |   |                                                                                   |   |                       |
| 278 | <p><b>pain_date_2</b></p> <p>Show the field ONLY if:<br/>[covid] = '1' and [diagnosis_post_covid(6)] = '1'</p>                               | Enter the date of the second Generalized Pain diagnosis, if applicable:                  | text (date_mdy)<br>Field Annotation: @HIDEBUTTON                                                                                                                                                                                                                                                                                     |   |                                                          |   |                                                                                   |   |                       |
| 279 | <p><b>pain_endstatus</b></p> <p>Show the field ONLY if:<br/>[covid] = '1' and [diagnosis_post_covid(6)] = '1'</p>                            | At the end of the follow-up period, the Generalized Pain was:                            | dropdown, Required<br><table border="1"> <tr><td>1</td><td>Resolved</td></tr> <tr><td>2</td><td>Ongoing</td></tr> <tr><td>3</td><td>Unknown/Unavailable</td></tr> </table> Field Annotation: @HIDEBUTTON                                                                                                                             | 1 | Resolved                                                 | 2 | Ongoing                                                                           | 3 | Unknown/Unavailable   |
| 1   | Resolved                                                                                                                                     |                                                                                          |                                                                                                                                                                                                                                                                                                                                      |   |                                                          |   |                                                                                   |   |                       |
| 2   | Ongoing                                                                                                                                      |                                                                                          |                                                                                                                                                                                                                                                                                                                                      |   |                                                          |   |                                                                                   |   |                       |
| 3   | Unknown/Unavailable                                                                                                                          |                                                                                          |                                                                                                                                                                                                                                                                                                                                      |   |                                                          |   |                                                                                   |   |                       |
| 280 | <p><b>pain_pasc</b></p>                                                                                                                      | Did the physician state in the notes whether the                                         | dropdown, Required                                                                                                                                                                                                                                                                                                                   |   |                                                          |   |                                                                                   |   |                       |

|     |                                                                                                                                |                                                                                                   |                                                                                                                                                                                                                                                                                                                                                   |   |                                                          |   |                                                                                   |   |                       |
|-----|--------------------------------------------------------------------------------------------------------------------------------|---------------------------------------------------------------------------------------------------|---------------------------------------------------------------------------------------------------------------------------------------------------------------------------------------------------------------------------------------------------------------------------------------------------------------------------------------------------|---|----------------------------------------------------------|---|-----------------------------------------------------------------------------------|---|-----------------------|
|     | Show the field ONLY if:<br>[covid] = '1' and [diagnosis_post_covid(6)] = '1'                                                   | Generalized Pain was related to PASC?                                                             | <table border="1"> <tr> <td>1</td> <td>Yes, the physician stated this condition was due to PASC</td> </tr> <tr> <td>2</td> <td>No, the physician stated that this condition was due to something other than PASC</td> </tr> <tr> <td>3</td> <td>Unknown/Not Available</td> </tr> </table> <p>Field Annotation: @HIDEBUTTON</p>                    | 1 | Yes, the physician stated this condition was due to PASC | 2 | No, the physician stated that this condition was due to something other than PASC | 3 | Unknown/Not Available |
| 1   | Yes, the physician stated this condition was due to PASC                                                                       |                                                                                                   |                                                                                                                                                                                                                                                                                                                                                   |   |                                                          |   |                                                                                   |   |                       |
| 2   | No, the physician stated that this condition was due to something other than PASC                                              |                                                                                                   |                                                                                                                                                                                                                                                                                                                                                   |   |                                                          |   |                                                                                   |   |                       |
| 3   | Unknown/Not Available                                                                                                          |                                                                                                   |                                                                                                                                                                                                                                                                                                                                                   |   |                                                          |   |                                                                                   |   |                       |
| 281 | <b>pain_pasc_y</b><br>Show the field ONLY if:<br>[covid] = '1' and [diagnosis_post_covid(6)] = '1' and [pain_pasc] = '1'       | Copy and paste the language from the notes that states the Generalized Pain was related to PASC:  | notes, Required<br>Field Annotation: @HIDEBUTTON                                                                                                                                                                                                                                                                                                  |   |                                                          |   |                                                                                   |   |                       |
| 282 | <b>anxiety_date</b><br>Show the field ONLY if:<br>[covid] = '1' and [diagnosis_post_covid(7)] = '1'                            | Enter the date of the initial Anxiety symptoms:                                                   | text (date_mdy), Required<br>Field Annotation: @HIDEBUTTON                                                                                                                                                                                                                                                                                        |   |                                                          |   |                                                                                   |   |                       |
| 283 | <b>anxiety_date_2</b><br>Show the field ONLY if:<br>[covid] = '1' and [diagnosis_post_covid(7)] = '1'                          | Enter the date of the second Anxiety symptoms, if applicable:                                     | text (date_mdy)<br>Field Annotation: @HIDEBUTTON                                                                                                                                                                                                                                                                                                  |   |                                                          |   |                                                                                   |   |                       |
| 284 | <b>anxiety_endstatus</b><br>Show the field ONLY if:<br>[covid] = '1' and [diagnosis_post_covid(7)] = '1'                       | At the end of the follow-up period, the Anxiety Symptoms were:                                    | dropdown, Required <table border="1"> <tr> <td>1</td> <td>Resolved</td> </tr> <tr> <td>2</td> <td>Ongoing</td> </tr> <tr> <td>3</td> <td>Unknown/Unavailable</td> </tr> </table> <p>Field Annotation: @HIDEBUTTON</p>                                                                                                                             | 1 | Resolved                                                 | 2 | Ongoing                                                                           | 3 | Unknown/Unavailable   |
| 1   | Resolved                                                                                                                       |                                                                                                   |                                                                                                                                                                                                                                                                                                                                                   |   |                                                          |   |                                                                                   |   |                       |
| 2   | Ongoing                                                                                                                        |                                                                                                   |                                                                                                                                                                                                                                                                                                                                                   |   |                                                          |   |                                                                                   |   |                       |
| 3   | Unknown/Unavailable                                                                                                            |                                                                                                   |                                                                                                                                                                                                                                                                                                                                                   |   |                                                          |   |                                                                                   |   |                       |
| 285 | <b>anxiety_pasc</b><br>Show the field ONLY if:<br>[covid] = '1' and [diagnosis_post_covid(7)] = '1'                            | Did the physician state in the notes whether the Anxiety Symptoms were related to PASC?           | dropdown, Required <table border="1"> <tr> <td>1</td> <td>Yes, the physician stated this condition was due to PASC</td> </tr> <tr> <td>2</td> <td>No, the physician stated that this condition was due to something other than PASC</td> </tr> <tr> <td>3</td> <td>Unknown/Not Available</td> </tr> </table> <p>Field Annotation: @HIDEBUTTON</p> | 1 | Yes, the physician stated this condition was due to PASC | 2 | No, the physician stated that this condition was due to something other than PASC | 3 | Unknown/Not Available |
| 1   | Yes, the physician stated this condition was due to PASC                                                                       |                                                                                                   |                                                                                                                                                                                                                                                                                                                                                   |   |                                                          |   |                                                                                   |   |                       |
| 2   | No, the physician stated that this condition was due to something other than PASC                                              |                                                                                                   |                                                                                                                                                                                                                                                                                                                                                   |   |                                                          |   |                                                                                   |   |                       |
| 3   | Unknown/Not Available                                                                                                          |                                                                                                   |                                                                                                                                                                                                                                                                                                                                                   |   |                                                          |   |                                                                                   |   |                       |
| 286 | <b>anxiety_pasc_y</b><br>Show the field ONLY if:<br>[covid] = '1' and [diagnosis_post_covid(7)] = '1' and [anxiety_pasc] = '1' | Copy and paste the language from the notes that states the Anxiety symptoms were related to PASC: | notes, Required<br>Field Annotation: @HIDEBUTTON                                                                                                                                                                                                                                                                                                  |   |                                                          |   |                                                                                   |   |                       |
| 287 | <b>fatigue_malaise_date</b><br>Show the field ONLY if:                                                                         | Enter the date of the initial Fatigue/Malaise diagnosis:                                          | text (date_mdy), Required<br>Field Annotation: @HIDEBUTTON                                                                                                                                                                                                                                                                                        |   |                                                          |   |                                                                                   |   |                       |

|     |                                                                                                                                                    |                                                                                                           |                                                                                                                                                                                                                                                                                                                                         |   |                                                          |   |                                                                                   |   |                       |
|-----|----------------------------------------------------------------------------------------------------------------------------------------------------|-----------------------------------------------------------------------------------------------------------|-----------------------------------------------------------------------------------------------------------------------------------------------------------------------------------------------------------------------------------------------------------------------------------------------------------------------------------------|---|----------------------------------------------------------|---|-----------------------------------------------------------------------------------|---|-----------------------|
|     | [covid] = '1' and [diagnosis_post_covid(8)] = '1'                                                                                                  |                                                                                                           |                                                                                                                                                                                                                                                                                                                                         |   |                                                          |   |                                                                                   |   |                       |
| 288 | <b>fatigue_malaise_date_2</b><br><br>Show the field ONLY if:<br>[covid] = '1' and [diagnosis_post_covid(8)] = '1'                                  | Enter the date of the second Fatigue/Malaise diagnosis, if applicable:                                    | text (date_mdy)<br>Field Annotation: @HIDEBUTTON                                                                                                                                                                                                                                                                                        |   |                                                          |   |                                                                                   |   |                       |
| 289 | <b>fatigue_malaise_endstatus</b><br><br>Show the field ONLY if:<br>[covid] = '1' and [diagnosis_post_covid(8)] = '1'                               | At the end of the follow-up period, the Fatigue/Malaise Symptoms were:                                    | dropdown, Required<br><table border="1"> <tr><td>1</td><td>Resolved</td></tr> <tr><td>2</td><td>Ongoing</td></tr> <tr><td>3</td><td>Unknown/Unavailable</td></tr> </table><br>Field Annotation: @HIDEBUTTON                                                                                                                             | 1 | Resolved                                                 | 2 | Ongoing                                                                           | 3 | Unknown/Unavailable   |
| 1   | Resolved                                                                                                                                           |                                                                                                           |                                                                                                                                                                                                                                                                                                                                         |   |                                                          |   |                                                                                   |   |                       |
| 2   | Ongoing                                                                                                                                            |                                                                                                           |                                                                                                                                                                                                                                                                                                                                         |   |                                                          |   |                                                                                   |   |                       |
| 3   | Unknown/Unavailable                                                                                                                                |                                                                                                           |                                                                                                                                                                                                                                                                                                                                         |   |                                                          |   |                                                                                   |   |                       |
| 290 | <b>fatigue_malaise_pasc</b><br><br>Show the field ONLY if:<br>[covid] = '1' and [diagnosis_post_covid(8)] = '1'                                    | Did the physician state in the notes whether the Fatigue/Malaise Symptoms were related to PASC?           | dropdown, Required<br><table border="1"> <tr><td>1</td><td>Yes, the physician stated this condition was due to PASC</td></tr> <tr><td>2</td><td>No, the physician stated that this condition was due to something other than PASC</td></tr> <tr><td>3</td><td>Unknown/Not Available</td></tr> </table><br>Field Annotation: @HIDEBUTTON | 1 | Yes, the physician stated this condition was due to PASC | 2 | No, the physician stated that this condition was due to something other than PASC | 3 | Unknown/Not Available |
| 1   | Yes, the physician stated this condition was due to PASC                                                                                           |                                                                                                           |                                                                                                                                                                                                                                                                                                                                         |   |                                                          |   |                                                                                   |   |                       |
| 2   | No, the physician stated that this condition was due to something other than PASC                                                                  |                                                                                                           |                                                                                                                                                                                                                                                                                                                                         |   |                                                          |   |                                                                                   |   |                       |
| 3   | Unknown/Not Available                                                                                                                              |                                                                                                           |                                                                                                                                                                                                                                                                                                                                         |   |                                                          |   |                                                                                   |   |                       |
| 291 | <b>fatigue_malaise_pasc_y</b><br><br>Show the field ONLY if:<br>[covid] = '1' and [diagnosis_post_covid(8)] = '1' and [fatigue_malaise_pasc] = '1' | Copy and paste the language from the notes that states the Fatigue/Malaise symptoms were related to PASC: | notes, Required<br>Field Annotation: @HIDEBUTTON                                                                                                                                                                                                                                                                                        |   |                                                          |   |                                                                                   |   |                       |
| 292 | <b>diarrhea_date</b><br><br>Show the field ONLY if:<br>[covid] = '1' and [diagnosis_post_covid(9)] = '1'                                           | Enter the date of the initial Diarrhea diagnosis:                                                         | text (date_mdy), Required<br>Field Annotation: @HIDEBUTTON                                                                                                                                                                                                                                                                              |   |                                                          |   |                                                                                   |   |                       |
| 293 | <b>diarrhea_date_2</b><br><br>Show the field ONLY if:<br>[covid] = '1' and [diagnosis_post_covid(9)] = '1'                                         | Enter the date of the second Diarrhea diagnosis, if applicable:                                           | text (date_mdy)<br>Field Annotation: @HIDEBUTTON                                                                                                                                                                                                                                                                                        |   |                                                          |   |                                                                                   |   |                       |
| 294 | <b>diarrhea_endstatus</b><br><br>Show the field ONLY if:<br>[covid] = '1' and [diagnosis_post_covid(9)] = '1'                                      | At the end of the follow-up period, the Diarrhea was:                                                     | dropdown, Required<br><table border="1"> <tr><td>1</td><td>Resolved</td></tr> <tr><td>2</td><td>Ongoing</td></tr> <tr><td>3</td><td>Unknown/Unavailable</td></tr> </table><br>Field Annotation: @HIDEBUTTON                                                                                                                             | 1 | Resolved                                                 | 2 | Ongoing                                                                           | 3 | Unknown/Unavailable   |
| 1   | Resolved                                                                                                                                           |                                                                                                           |                                                                                                                                                                                                                                                                                                                                         |   |                                                          |   |                                                                                   |   |                       |
| 2   | Ongoing                                                                                                                                            |                                                                                                           |                                                                                                                                                                                                                                                                                                                                         |   |                                                          |   |                                                                                   |   |                       |
| 3   | Unknown/Unavailable                                                                                                                                |                                                                                                           |                                                                                                                                                                                                                                                                                                                                         |   |                                                          |   |                                                                                   |   |                       |
| 295 | <b>diarrhea_pasc</b>                                                                                                                               | Did the physician state in the notes whether the                                                          | dropdown, Required                                                                                                                                                                                                                                                                                                                      |   |                                                          |   |                                                                                   |   |                       |

|     |                                                                                                                                                                |                                                                                               |                                                                                                                                                                                                                                                                                                                                                          |   |                                                          |   |                                                                                   |   |                       |
|-----|----------------------------------------------------------------------------------------------------------------------------------------------------------------|-----------------------------------------------------------------------------------------------|----------------------------------------------------------------------------------------------------------------------------------------------------------------------------------------------------------------------------------------------------------------------------------------------------------------------------------------------------------|---|----------------------------------------------------------|---|-----------------------------------------------------------------------------------|---|-----------------------|
|     | <p>Show the field ONLY if:<br/>[covid] = '1' and [diagnos<br/>is_post_covid(9)] = '1'</p>                                                                      | Diarrhea was related to PASC?                                                                 | <table border="1"> <tr> <td>1</td> <td>Yes, the physician stated this condition was due to PASC</td> </tr> <tr> <td>2</td> <td>No, the physician stated that this condition was due to something other than PASC</td> </tr> <tr> <td>3</td> <td>Unknown/Not Available</td> </tr> </table> <p>Field Annotation: @HIDEBUTTON</p>                           | 1 | Yes, the physician stated this condition was due to PASC | 2 | No, the physician stated that this condition was due to something other than PASC | 3 | Unknown/Not Available |
| 1   | Yes, the physician stated this condition was due to PASC                                                                                                       |                                                                                               |                                                                                                                                                                                                                                                                                                                                                          |   |                                                          |   |                                                                                   |   |                       |
| 2   | No, the physician stated that this condition was due to something other than PASC                                                                              |                                                                                               |                                                                                                                                                                                                                                                                                                                                                          |   |                                                          |   |                                                                                   |   |                       |
| 3   | Unknown/Not Available                                                                                                                                          |                                                                                               |                                                                                                                                                                                                                                                                                                                                                          |   |                                                          |   |                                                                                   |   |                       |
| 296 | <p><b>diarrhea_pasc_y</b></p> <p>Show the field ONLY if:<br/>[covid] = '1' and [diagnos<br/>is_post_covid(9)] = '1' and<br/>[diarrhea_pasc] = '1'</p>          | Copy and paste the language from the notes that states the Diarrhea was related to PASC:      | <p>notes, Required</p> <p>Field Annotation: @HIDEBUTTON</p>                                                                                                                                                                                                                                                                                              |   |                                                          |   |                                                                                   |   |                       |
| 297 | <p><b>fever_chills_date</b></p> <p>Show the field ONLY if:<br/>[covid] = '1' and [diagnos<br/>is_post_covid(10)] = '1'</p>                                     | Enter the date of the initial Fever/Chills diagnosis:                                         | <p>text (date_mdy), Required</p> <p>Field Annotation: @HIDEBUTTON</p>                                                                                                                                                                                                                                                                                    |   |                                                          |   |                                                                                   |   |                       |
| 298 | <p><b>fever_chills_date_2</b></p> <p>Show the field ONLY if:<br/>[covid] = '1' and [diagnos<br/>is_post_covid(10)] = '1'</p>                                   | Enter the date of the second Fever/Chills diagnosis, if applicable:                           | <p>text (date_mdy)</p> <p>Field Annotation: @HIDEBUTTON</p>                                                                                                                                                                                                                                                                                              |   |                                                          |   |                                                                                   |   |                       |
| 299 | <p><b>fever_chills_endstatus</b></p> <p>Show the field ONLY if:<br/>[covid] = '1' and [diagnos<br/>is_post_covid(10)] = '1'</p>                                | At the end of the follow-up period, the Fever/Chills were:                                    | <p>dropdown, Required</p> <table border="1"> <tr> <td>1</td> <td>Resolved</td> </tr> <tr> <td>2</td> <td>Ongoing</td> </tr> <tr> <td>3</td> <td>Unknown/Unavailable</td> </tr> </table> <p>Field Annotation: @HIDEBUTTON</p>                                                                                                                             | 1 | Resolved                                                 | 2 | Ongoing                                                                           | 3 | Unknown/Unavailable   |
| 1   | Resolved                                                                                                                                                       |                                                                                               |                                                                                                                                                                                                                                                                                                                                                          |   |                                                          |   |                                                                                   |   |                       |
| 2   | Ongoing                                                                                                                                                        |                                                                                               |                                                                                                                                                                                                                                                                                                                                                          |   |                                                          |   |                                                                                   |   |                       |
| 3   | Unknown/Unavailable                                                                                                                                            |                                                                                               |                                                                                                                                                                                                                                                                                                                                                          |   |                                                          |   |                                                                                   |   |                       |
| 300 | <p><b>fever_chills_pasc</b></p> <p>Show the field ONLY if:<br/>[covid] = '1' and [diagnos<br/>is_post_covid(10)] = '1'</p>                                     | Did the physician state in the notes whether the Fever/Chills were related to PASC?           | <p>dropdown, Required</p> <table border="1"> <tr> <td>1</td> <td>Yes, the physician stated this condition was due to PASC</td> </tr> <tr> <td>2</td> <td>No, the physician stated that this condition was due to something other than PASC</td> </tr> <tr> <td>3</td> <td>Unknown/Not Available</td> </tr> </table> <p>Field Annotation: @HIDEBUTTON</p> | 1 | Yes, the physician stated this condition was due to PASC | 2 | No, the physician stated that this condition was due to something other than PASC | 3 | Unknown/Not Available |
| 1   | Yes, the physician stated this condition was due to PASC                                                                                                       |                                                                                               |                                                                                                                                                                                                                                                                                                                                                          |   |                                                          |   |                                                                                   |   |                       |
| 2   | No, the physician stated that this condition was due to something other than PASC                                                                              |                                                                                               |                                                                                                                                                                                                                                                                                                                                                          |   |                                                          |   |                                                                                   |   |                       |
| 3   | Unknown/Not Available                                                                                                                                          |                                                                                               |                                                                                                                                                                                                                                                                                                                                                          |   |                                                          |   |                                                                                   |   |                       |
| 301 | <p><b>fever_chills_pasc_y</b></p> <p>Show the field ONLY if:<br/>[covid] = '1' and [diagnos<br/>is_post_covid(10)] = '1' and<br/>[fever_chills_pasc] = '1'</p> | Copy and paste the language from the notes that states the Fever/Chills were related to PASC: | <p>notes, Required</p> <p>Field Annotation: @HIDEBUTTON</p>                                                                                                                                                                                                                                                                                              |   |                                                          |   |                                                                                   |   |                       |

|     |                                                                                                                                                 |                                                                                           |                                                                                                                                                                                                                                                                                                                                      |   |                                                          |   |                                                                                   |   |                       |
|-----|-------------------------------------------------------------------------------------------------------------------------------------------------|-------------------------------------------------------------------------------------------|--------------------------------------------------------------------------------------------------------------------------------------------------------------------------------------------------------------------------------------------------------------------------------------------------------------------------------------|---|----------------------------------------------------------|---|-----------------------------------------------------------------------------------|---|-----------------------|
| 302 | <p><b>skin_rash_date</b></p> <p>Show the field ONLY if:<br/>[covid] = '1' and [diagnosis_post_covid(11)] = '1'</p>                              | Enter the date of the initial Skin Rash diagnosis:                                        | text (date_mdy), Required<br>Field Annotation: @HIDEBUTTON                                                                                                                                                                                                                                                                           |   |                                                          |   |                                                                                   |   |                       |
| 303 | <p><b>skin_rash_date_2</b></p> <p>Show the field ONLY if:<br/>[covid] = '1' and [diagnosis_post_covid(11)] = '1'</p>                            | Enter the date of the second Skin Rash diagnosis, if applicable:                          | text (date_mdy)<br>Field Annotation: @HIDEBUTTON                                                                                                                                                                                                                                                                                     |   |                                                          |   |                                                                                   |   |                       |
| 304 | <p><b>skinrash_endstatus</b></p> <p>Show the field ONLY if:<br/>[covid] = '1' and [diagnosis_post_covid(11)] = '1'</p>                          | At the end of the follow-up period, the Skin Rash was:                                    | dropdown, Required<br><table border="1"> <tr><td>1</td><td>Resolved</td></tr> <tr><td>2</td><td>Ongoing</td></tr> <tr><td>3</td><td>Unknown/Unavailable</td></tr> </table> Field Annotation: @HIDEBUTTON                                                                                                                             | 1 | Resolved                                                 | 2 | Ongoing                                                                           | 3 | Unknown/Unavailable   |
| 1   | Resolved                                                                                                                                        |                                                                                           |                                                                                                                                                                                                                                                                                                                                      |   |                                                          |   |                                                                                   |   |                       |
| 2   | Ongoing                                                                                                                                         |                                                                                           |                                                                                                                                                                                                                                                                                                                                      |   |                                                          |   |                                                                                   |   |                       |
| 3   | Unknown/Unavailable                                                                                                                             |                                                                                           |                                                                                                                                                                                                                                                                                                                                      |   |                                                          |   |                                                                                   |   |                       |
| 305 | <p><b>skin_rash_pasc</b></p> <p>Show the field ONLY if:<br/>[covid] = '1' and [diagnosis_post_covid(11)] = '1'</p>                              | Did the physician state in the notes whether the Skin Rash was related to PASC?           | dropdown, Required<br><table border="1"> <tr><td>1</td><td>Yes, the physician stated this condition was due to PASC</td></tr> <tr><td>2</td><td>No, the physician stated that this condition was due to something other than PASC</td></tr> <tr><td>3</td><td>Unknown/Not Available</td></tr> </table> Field Annotation: @HIDEBUTTON | 1 | Yes, the physician stated this condition was due to PASC | 2 | No, the physician stated that this condition was due to something other than PASC | 3 | Unknown/Not Available |
| 1   | Yes, the physician stated this condition was due to PASC                                                                                        |                                                                                           |                                                                                                                                                                                                                                                                                                                                      |   |                                                          |   |                                                                                   |   |                       |
| 2   | No, the physician stated that this condition was due to something other than PASC                                                               |                                                                                           |                                                                                                                                                                                                                                                                                                                                      |   |                                                          |   |                                                                                   |   |                       |
| 3   | Unknown/Not Available                                                                                                                           |                                                                                           |                                                                                                                                                                                                                                                                                                                                      |   |                                                          |   |                                                                                   |   |                       |
| 306 | <p><b>skin_rash_pasc_y</b></p> <p>Show the field ONLY if:<br/>[covid] = '1' and [diagnosis_post_covid(11)] = '1' and [skin_rash_pasc] = '1'</p> | Copy and paste the language from the notes that states the Skin Rash was related to PASC: | notes, Required<br>Field Annotation: @HIDEBUTTON                                                                                                                                                                                                                                                                                     |   |                                                          |   |                                                                                   |   |                       |
| 307 | <p><b>headache_date</b></p> <p>Show the field ONLY if:<br/>[covid] = '1' and [diagnosis_post_covid(12)] = '1'</p>                               | Enter the date of the initial Headache diagnosis:                                         | text (date_mdy), Required<br>Field Annotation: @HIDEBUTTON                                                                                                                                                                                                                                                                           |   |                                                          |   |                                                                                   |   |                       |
| 308 | <p><b>headache_date_2</b></p> <p>Show the field ONLY if:<br/>[covid] = '1' and [diagnosis_post_covid(12)] = '1'</p>                             | Enter the date of the second Headache diagnosis, if applicable:                           | text (date_mdy)<br>Field Annotation: @HIDEBUTTON                                                                                                                                                                                                                                                                                     |   |                                                          |   |                                                                                   |   |                       |
| 309 | <p><b>headache_endstatus</b></p> <p>Show the field ONLY if:<br/>[covid] = '1' and [diagnosis_post_covid(12)] = '1'</p>                          | At the end of the follow-up period, the Headache was:                                     | dropdown, Required<br><table border="1"> <tr><td>1</td><td>Resolved</td></tr> <tr><td>2</td><td>Ongoing</td></tr> <tr><td>3</td><td>Unknown/Unavailable</td></tr> </table> Field Annotation: @HIDEBUTTON                                                                                                                             | 1 | Resolved                                                 | 2 | Ongoing                                                                           | 3 | Unknown/Unavailable   |
| 1   | Resolved                                                                                                                                        |                                                                                           |                                                                                                                                                                                                                                                                                                                                      |   |                                                          |   |                                                                                   |   |                       |
| 2   | Ongoing                                                                                                                                         |                                                                                           |                                                                                                                                                                                                                                                                                                                                      |   |                                                          |   |                                                                                   |   |                       |
| 3   | Unknown/Unavailable                                                                                                                             |                                                                                           |                                                                                                                                                                                                                                                                                                                                      |   |                                                          |   |                                                                                   |   |                       |
| 310 | <p><b>headache_pasc</b></p>                                                                                                                     | Did the physician state in the notes whether the Headache was related to PASC?            | dropdown, Required                                                                                                                                                                                                                                                                                                                   |   |                                                          |   |                                                                                   |   |                       |

|                                                                    |                                                                                                                                       |                                                                                                                                                                                                                                                                                                                                                                                                                                                                                            |                                                                                                                                                                                                                                                                                                                                |   |                                                          |   |                                                                                   |   |                       |
|--------------------------------------------------------------------|---------------------------------------------------------------------------------------------------------------------------------------|--------------------------------------------------------------------------------------------------------------------------------------------------------------------------------------------------------------------------------------------------------------------------------------------------------------------------------------------------------------------------------------------------------------------------------------------------------------------------------------------|--------------------------------------------------------------------------------------------------------------------------------------------------------------------------------------------------------------------------------------------------------------------------------------------------------------------------------|---|----------------------------------------------------------|---|-----------------------------------------------------------------------------------|---|-----------------------|
|                                                                    | Show the field ONLY if:<br>[covid] = '1' and [diagnosis_post_covid(12)] = '1'                                                         |                                                                                                                                                                                                                                                                                                                                                                                                                                                                                            | <table border="1"> <tr> <td>1</td> <td>Yes, the physician stated this condition was due to PASC</td> </tr> <tr> <td>2</td> <td>No, the physician stated that this condition was due to something other than PASC</td> </tr> <tr> <td>3</td> <td>Unknown/Not Available</td> </tr> </table> <p>Field Annotation: @HIDEBUTTON</p> | 1 | Yes, the physician stated this condition was due to PASC | 2 | No, the physician stated that this condition was due to something other than PASC | 3 | Unknown/Not Available |
| 1                                                                  | Yes, the physician stated this condition was due to PASC                                                                              |                                                                                                                                                                                                                                                                                                                                                                                                                                                                                            |                                                                                                                                                                                                                                                                                                                                |   |                                                          |   |                                                                                   |   |                       |
| 2                                                                  | No, the physician stated that this condition was due to something other than PASC                                                     |                                                                                                                                                                                                                                                                                                                                                                                                                                                                                            |                                                                                                                                                                                                                                                                                                                                |   |                                                          |   |                                                                                   |   |                       |
| 3                                                                  | Unknown/Not Available                                                                                                                 |                                                                                                                                                                                                                                                                                                                                                                                                                                                                                            |                                                                                                                                                                                                                                                                                                                                |   |                                                          |   |                                                                                   |   |                       |
| 311                                                                | <b>headache_pasc_y</b><br><br>Show the field ONLY if:<br>[covid] = '1' and [diagnosis_post_covid(12)] = '1' and [headache_pasc] = '1' | Copy and paste the language from the notes that states the Headache was related to PASC:                                                                                                                                                                                                                                                                                                                                                                                                   | notes, Required<br>Field Annotation: @HIDEBUTTON                                                                                                                                                                                                                                                                               |   |                                                          |   |                                                                                   |   |                       |
| 312                                                                | <b>other_pasc</b>                                                                                                                     | <p>Section Header: <i>Section 7. Additional Comments</i></p> <p>Is there any additional information in the patient's chart about their PASC status that you think is relevant? For example, if this patient did not have PASC, enter any information you saw that might explain why they were flagged as a PASC patient (such as references to PASC or related conditions that were ruled out).</p> <p>If so, please enter below, ensuring that any PHI (names, MRNs, etc) is removed.</p> | notes, Required                                                                                                                                                                                                                                                                                                                |   |                                                          |   |                                                                                   |   |                       |
| 313                                                                | <b>care_everywhere</b>                                                                                                                | Is there any additional information in Care Everywhere about this patient's COVID or PASC status?                                                                                                                                                                                                                                                                                                                                                                                          | notes, Required                                                                                                                                                                                                                                                                                                                |   |                                                          |   |                                                                                   |   |                       |
| 314                                                                | <b>optional_notes</b>                                                                                                                 | Optional- add any additional comments about this patient's chart.                                                                                                                                                                                                                                                                                                                                                                                                                          | notes                                                                                                                                                                                                                                                                                                                          |   |                                                          |   |                                                                                   |   |                       |
| 315                                                                | <b>recover_pediatric_chart_review_form_complete</b>                                                                                   | <p>Section Header: <i>Form Status</i></p> <p>Complete?</p>                                                                                                                                                                                                                                                                                                                                                                                                                                 | <p>dropdown</p> <table border="1"> <tr> <td>0</td> <td>Incomplete</td> </tr> <tr> <td>1</td> <td>Unverified</td> </tr> <tr> <td>2</td> <td>Complete</td> </tr> </table>                                                                                                                                                        | 0 | Incomplete                                               | 1 | Unverified                                                                        | 2 | Complete              |
| 0                                                                  | Incomplete                                                                                                                            |                                                                                                                                                                                                                                                                                                                                                                                                                                                                                            |                                                                                                                                                                                                                                                                                                                                |   |                                                          |   |                                                                                   |   |                       |
| 1                                                                  | Unverified                                                                                                                            |                                                                                                                                                                                                                                                                                                                                                                                                                                                                                            |                                                                                                                                                                                                                                                                                                                                |   |                                                          |   |                                                                                   |   |                       |
| 2                                                                  | Complete                                                                                                                              |                                                                                                                                                                                                                                                                                                                                                                                                                                                                                            |                                                                                                                                                                                                                                                                                                                                |   |                                                          |   |                                                                                   |   |                       |
| <b>Instrument: Clinician Adjudication (clinician_adjudication)</b> |                                                                                                                                       |                                                                                                                                                                                                                                                                                                                                                                                                                                                                                            |                                                                                                                                                                                                                                                                                                                                |   |                                                          |   |                                                                                   |   |                       |
| 316                                                                | <b>covid_adj</b>                                                                                                                      | <p>Section Header: <i>Overview of Chart Reviewer Results</i></p> <p>Does this patient have COVID-19?[covid]</p>                                                                                                                                                                                                                                                                                                                                                                            | descriptive                                                                                                                                                                                                                                                                                                                    |   |                                                          |   |                                                                                   |   |                       |
| 317                                                                | <b>coviddiagnosis_date_adj</b><br><br>Show the field ONLY if:<br>[covid] = '1'                                                        | Enter the date the first COVID-19 diagnosis was made: [coviddiagnosis_date]                                                                                                                                                                                                                                                                                                                                                                                                                | descriptive                                                                                                                                                                                                                                                                                                                    |   |                                                          |   |                                                                                   |   |                       |
| 318                                                                | <b>coviddiagnosis_method_adj</b><br><br>Show the field ONLY if:<br>[covid] = '1'                                                      | How was the diagnosis made?<br>[coviddiagnosis_method]                                                                                                                                                                                                                                                                                                                                                                                                                                     | descriptive                                                                                                                                                                                                                                                                                                                    |   |                                                          |   |                                                                                   |   |                       |
| 319                                                                | <b>coviddiagnosis_mult</b>                                                                                                            | Did the patient have repeated COVID-19 (more than                                                                                                                                                                                                                                                                                                                                                                                                                                          | descriptive                                                                                                                                                                                                                                                                                                                    |   |                                                          |   |                                                                                   |   |                       |

|     |                                                                                                                          |                                                                                                                                                                                  |             |
|-----|--------------------------------------------------------------------------------------------------------------------------|----------------------------------------------------------------------------------------------------------------------------------------------------------------------------------|-------------|
|     | <b>iple_adj</b><br>Show the field ONLY if:<br>[covid] = '1'                                                              | one SARS-CoV-2 infection)?[coviddiagnosis_multiple]                                                                                                                              |             |
| 320 | <b>coviddiagnosis_multiple_dates_adj</b><br>Show the field ONLY if:<br>[covid] = '1' and [coviddiagnosis_multiple] = '1' | Additional COVID diagnosis dates:<br>[coviddiagnosis_date_2] [coviddiagnosis_date_3]<br>[coviddiagnosis_date_4] [coviddiagnosis_date_5]                                          | descriptive |
| 321 | <b>misc_diagnosis_adj</b><br>Show the field ONLY if:<br>[covid] = '1'                                                    | Are there any references to the patient being diagnosed with MIS-C at any time during study period (Index Date up to 1 year after last COVID-19 diagnosis date)?[misc_diagnosis] | descriptive |
| 322 | <b>misc_terms_adj</b><br>Show the field ONLY if:<br>[covid] = '1' and [misc_diagnosis] = '1'                             | Enter the MIS-C diagnoses terms in the patient's chart:[misc_terms]                                                                                                              | descriptive |
| 323 | <b>misc_date_adj</b><br>Show the field ONLY if:<br>[covid] = '1' and [misc_diagnosis] = '1'                              | First MIS-C diagnosis date:[misc_date]                                                                                                                                           | descriptive |
| 324 | <b>misc_date_adj_2</b><br>Show the field ONLY if:<br>[covid] = '1' and [misc_diagnosis] = '1'                            | Second MIS-C diagnosis date (when applicable):<br>[misc_date_2]                                                                                                                  | descriptive |
| 325 | <b>u099_diagnosis_adj</b><br>Show the field ONLY if:<br>[covid] = '1'                                                    | Did the patient have any references to a diagnosis for "PASC" at any time during study period?<br>[u099_diagnosis]                                                               | descriptive |
| 326 | <b>pasc_terms_adj</b><br>Show the field ONLY if:<br>[covid] = '1' and [u099_diagnosis] = '1'                             | Enter the PASC diagnoses references in the patient's chart:[pasc_terms]                                                                                                          | descriptive |
| 327 | <b>pasc_date_adj</b><br>Show the field ONLY if:<br>[covid] = '1' and [u099_diagnosis] = '1'                              | Enter the first PASC diagnosis date:[pasc_date]                                                                                                                                  | descriptive |
| 328 | <b>pasc_date_adj_2</b><br>Show the field ONLY if:<br>[covid] = '1' and [u099_diagnosis] = '1'                            | Second PASC diagnosis date (when applicable):<br>[pasc_date_2]                                                                                                                   | descriptive |
| 329 | <b>pcr_antigen_positive_adj</b><br>Show the field ONLY if:<br>[covid] = '1'                                              | Did the patient have a SARS-CoV-2 RT PCR/ antigen test positive during the study period?<br>[pcr_antigen_positive]                                                               | descriptive |
| 330 | <b>kawasaki_diagnosis_</b>                                                                                               | Did the patient have a diagnosis for Kawasaki                                                                                                                                    | descriptive |

|     |                                                                                                                                                           |                                                                                                                                                                            |                                                        |
|-----|-----------------------------------------------------------------------------------------------------------------------------------------------------------|----------------------------------------------------------------------------------------------------------------------------------------------------------------------------|--------------------------------------------------------|
|     | <b>adj</b><br>Show the field ONLY if:<br>[covid] = '1'                                                                                                    | disease assigned within 42 days of a positive RT-PCR/Antigen test?[kawasaki_diagnosis]                                                                                     |                                                        |
| 331 | <b>kawasaki_terms_adj</b><br>Show the field ONLY if:<br>[covid] = '1' and [kawasaki_diagnosis] = '1'                                                      | Enter the diagnosis terms for Kawasaki Disease found in the patient chart.[kawasaki_terms]                                                                                 | descriptive                                            |
| 332 | <b>serology_test_adj</b><br>Show the field ONLY if:<br>[covid] = '1'                                                                                      | Did the patient have SARS-CoV-2 serology positive test result?[serology_test]                                                                                              | descriptive                                            |
| 333 | <b>serology_test_reason_adj</b><br>Show the field ONLY if:<br>[covid] = '1' and ([serology_test] = '1' or [serology_test] = '3' or [serology_test] = '4') | Select the reason why the patient was given a serology test:[serology_test_reason]                                                                                         | descriptive                                            |
| 334 | <b>serology_test_date_adj</b><br>Show the field ONLY if:<br>[covid] = '1' and ([serology_test] = '1' or [serology_test] = '3' or [serology_test] = '4')   | Enter the date of the initial serology test:<br>[serology_test_date]                                                                                                       | descriptive                                            |
| 335 | <b>conditions_post_adj</b><br>Show the field ONLY if:<br>[covid] = '1'                                                                                    | Did the patient have any occurrence of the following conditions, on Day 28 or later after initial COVID-19 positive diagnosis? Select all that apply.<br>[conditions_post] | descriptive                                            |
| 336 | <b>pasc_other_adj</b><br>Show the field ONLY if:<br>[conditions_post(18)] = '1'                                                                           | List the Other conditions and first 2 diagnosis dates of each condition:[pasc_other]                                                                                       | descriptive, Required<br>Field Annotation: @HIDEBUTTON |
| 337 | <b>covid_date_followup_adj</b><br>Show the field ONLY if:<br>[conditions_post(1)] = '1'                                                                   | Enter the first COVID diagnosis date found during the follow-up period:[covid_date_followup]                                                                               | descriptive, Required<br>Field Annotation: @HIDEBUTTON |
| 338 | <b>covid_endstatus_adj</b><br>Show the field ONLY if:<br>[conditions_post(1)] = '1'                                                                       | At the end of the follow-up period, the COVID diagnosis was:[covid_endstatus]                                                                                              | descriptive, Required<br>Field Annotation: @HIDEBUTTON |
| 339 | <b>covid_diagnosis_pasc_adj</b><br>Show the field ONLY if:<br>[conditions_post(1)] = '1'                                                                  | Did the physician state in the chart whether this continued COVID diagnosis was due to PASC?<br>[covid_diagnosis_pasc]                                                     | descriptive, Required<br>Field Annotation: @HIDEBUTTON |

|     |                                                                                                                                        |                                                                                                                                                                                                  |                                                        |
|-----|----------------------------------------------------------------------------------------------------------------------------------------|--------------------------------------------------------------------------------------------------------------------------------------------------------------------------------------------------|--------------------------------------------------------|
| 340 | <b>covid_diagnosis_pasc_y_adj</b><br>Show the field ONLY if:<br>[conditions_post(1)] = '1'<br>and [covid_diagnosis_pasc] = '1'         | Copy and paste the language from the physician notes that says this continued COVID diagnosis was related to PASC (make sure to remove any PHI, such as MRNs or names): [covid_diagnosis_pasc_y] | descriptive, Required<br>Field Annotation: @HIDEBUTTON |
| 341 | <b>acuterer_date_followup_adj</b><br>Show the field ONLY if:<br>[conditions_post(2)] = '1'                                             | Enter the first and second (when applicable) Acute respiratory distress syndrome diagnosis dates found during the follow-up period:[acuterer_date_followup]<br>[acuterer_date_followup_2]        | descriptive, Required<br>Field Annotation: @HIDEBUTTON |
| 342 | <b>acuterer_endstatus_adj</b><br>Show the field ONLY if:<br>[conditions_post(2)] = '1'                                                 | At the end of the follow-up period, the Acute respiratory distress syndrome was:<br>[acuterer_endstatus]                                                                                         | descriptive, Required<br>Field Annotation: @HIDEBUTTON |
| 343 | <b>acuterer_diagnosis_pasc_adj</b><br>Show the field ONLY if:<br>[conditions_post(2)] = '1'                                            | Did the physician state in the chart whether the Acute respiratory distress syndrome diagnosis was due to PASC?[acuterer_diagnosis_pasc]                                                         | descriptive, Required<br>Field Annotation: @HIDEBUTTON |
| 344 | <b>acuterer_diagnosis_pasc_y_adj</b><br>Show the field ONLY if:<br>[conditions_post(2)] = '1'<br>and [acuterer_diagnosis_pasc] = '1'   | Copy and paste the language from the physician notes that states this Acute respiratory distress syndrome diagnosis was related to PASC:<br>[acuterer_diagnosis_pasc_y]                          | descriptive, Required<br>Field Annotation: @HIDEBUTTON |
| 345 | <b>losssmell_date_followup_adj</b><br>Show the field ONLY if:<br>[conditions_post(3)] = '1'                                            | Enter the first and second (when applicable) Loss of smell diagnosis dates found during the follow-up period:[losssmell_date_followup]<br>[losssmell_date_followup_2]                            | descriptive, Required<br>Field Annotation: @HIDEBUTTON |
| 346 | <b>losssmell_endstatus_adj</b><br>Show the field ONLY if:<br>[conditions_post(3)] = '1'                                                | At the end of the follow-up period, the Loss of smell was:[losssmell_endstatus]                                                                                                                  | descriptive, Required<br>Field Annotation: @HIDEBUTTON |
| 347 | <b>losssmell_diagnosis_pasc_adj</b><br>Show the field ONLY if:<br>[conditions_post(3)] = '1'                                           | Did the physician state in the chart whether the Loss of smell diagnosis was due to PASC?<br>[losssmell_diagnosis_pasc]                                                                          | descriptive, Required<br>Field Annotation: @HIDEBUTTON |
| 348 | <b>losssmell_diagnosis_pasc_y_adj</b><br>Show the field ONLY if:<br>[conditions_post(3)] = '1'<br>and [losssmell_diagnosis_pasc] = '1' | Copy and paste the language from the physician notes that states the Loss of smell diagnosis was related to PASC:[losssmell_diagnosis_pasc_y]                                                    | descriptive, Required<br>Field Annotation: @HIDEBUTTON |
| 349 | <b>losstaste_date_followup_adj</b><br>Show the field ONLY if:                                                                          | Enter the first and second (when applicable) Loss of taste diagnosis dates found during the follow-up period:[losstaste_date_followup]<br>[losstaste_date_followup_2]                            | descriptive, Required<br>Field Annotation: @HIDEBUTTON |

|     |                                                                                                                                        |                                                                                                                                                                          |                                                        |
|-----|----------------------------------------------------------------------------------------------------------------------------------------|--------------------------------------------------------------------------------------------------------------------------------------------------------------------------|--------------------------------------------------------|
|     | [conditions_post(4)] = '1'                                                                                                             |                                                                                                                                                                          |                                                        |
| 350 | <b>losstaste_endstatus_adj</b><br>Show the field ONLY if:<br>[conditions_post(4)] = '1'                                                | At the end of the follow-up period, the Loss of taste was:[losstaste_endstatus]                                                                                          | descriptive, Required<br>Field Annotation: @HIDEBUTTON |
| 351 | <b>losstaste_diagnosis_pasc_adj</b><br>Show the field ONLY if:<br>[conditions_post(4)] = '1'                                           | Did the physician state in the chart whether the Loss of taste diagnosis was due to PASC?<br>[losstaste_diagnosis_pasc]                                                  | descriptive, Required<br>Field Annotation: @HIDEBUTTON |
| 352 | <b>losstaste_diagnosis_pasc_y_adj</b><br>Show the field ONLY if:<br>[conditions_post(4)] = '1'<br>and [losstaste_diagnosis_pasc] = '1' | Copy and paste the language from the physician notes that states the Loss of taste diagnosis was due to PASC:[losstaste_diagnosis_pasc_y]                                | descriptive, Required<br>Field Annotation: @HIDEBUTTON |
| 353 | <b>lossother_date_followup_adj</b><br>Show the field ONLY if:<br>[conditions_post(5)] = '1'                                            | Enter the first and second (when applicable) Other Change of Smell/Taste date found during the follow-up period:[lossother_date_followup]<br>[lossother_date_followup_2] | descriptive, Required<br>Field Annotation: @HIDEBUTTON |
| 354 | <b>lossother_endstatus_adj</b><br>Show the field ONLY if:<br>[conditions_post(5)] = '1'                                                | At the end of the follow-up period, the Other Change of Smell/Taste was:[lossother_endstatus]                                                                            | descriptive, Required<br>Field Annotation: @HIDEBUTTON |
| 355 | <b>lossother_diagnosis_pasc_adj</b><br>Show the field ONLY if:<br>[conditions_post(5)] = '1'                                           | Did the physician state in the chart whether the Other Change of Smell/Taste was due to PASC?<br>[lossother_diagnosis_pasc]                                              | descriptive, Required<br>Field Annotation: @HIDEBUTTON |
| 356 | <b>lossother_diagnosis_pasc_y_adj</b><br>Show the field ONLY if:<br>[conditions_post(5)] = '1'<br>and [lossother_diagnosis_pasc] = '1' | Copy and paste the language from the physician notes that states the Other Change of Smell/Taste was due to PASC:[lossother_diagnosis_pasc_y]                            | descriptive, Required<br>Field Annotation: @HIDEBUTTON |
| 357 | <b>myocarditis_date_followup_adj</b><br>Show the field ONLY if:<br>[conditions_post(6)] = '1'                                          | Enter the first and second (when applicable) Myocarditis diagnosis date found during the follow-up period:[myocarditis_date_followup]<br>[myocarditis_date_followup_2]   | descriptive, Required<br>Field Annotation: @HIDEBUTTON |
| 358 | <b>myocarditis_endstatus_adj</b><br>Show the field ONLY if:<br>[conditions_post(6)] = '1'                                              | At the end of the follow-up period, the Myocarditis was:[myocarditis_endstatus]                                                                                          | descriptive, Required<br>Field Annotation: @HIDEBUTTON |
| 359 | <b>myocarditis_diagnosis_pasc_adj</b><br>Show the field ONLY if:<br>[conditions_post(6)] = '1'                                         | Did the physician state in the notes whether the Myocarditis diagnosis was due to PASC?<br>[myocarditis_diagnosis_pasc]                                                  | descriptive, Required<br>Field Annotation: @HIDEBUTTON |

|     |                                                                                                                                                  |                                                                                                                                                                           |                                                        |
|-----|--------------------------------------------------------------------------------------------------------------------------------------------------|---------------------------------------------------------------------------------------------------------------------------------------------------------------------------|--------------------------------------------------------|
| 360 | <b>myocarditis_diagnosis_pasc_y_adj</b><br><br>Show the field ONLY if:<br>[conditions_post(6)] = '1'<br>and [myocarditis_diagnosis_pasc] = '1'   | Copy and paste the language from the physician notes that states the Myocarditis diagnosis was due to PASC:[myocarditis_diagnosis_pasc_y]                                 | descriptive, Required<br>Field Annotation: @HIDEBUTTON |
| 361 | <b>pericarditis_date_followup_adj</b><br><br>Show the field ONLY if:<br>[conditions_post(7)] = '1'                                               | Enter the first and second (when applicable) Pericarditis diagnosis date found during the follow-up period:[pericarditis_date_followup]<br>[pericarditis_date_followup_2] | descriptive, Required<br>Field Annotation: @HIDEBUTTON |
| 362 | <b>pericarditis_endstatus_adj</b><br><br>Show the field ONLY if:<br>[conditions_post(7)] = '1'                                                   | At the end of the follow-up period, the Pericarditis was:[pericarditis_endstatus]                                                                                         | descriptive, Required<br>Field Annotation: @HIDEBUTTON |
| 363 | <b>pericarditis_diagnosis_pasc_adj</b><br><br>Show the field ONLY if:<br>[conditions_post(7)] = '1'                                              | Did the physician state in the notes whether the Pericarditis diagnosis was due to PASC?<br>[pericarditis_diagnosis_pasc]                                                 | descriptive, Required<br>Field Annotation: @HIDEBUTTON |
| 364 | <b>pericarditis_diagnosis_pasc_y_adj</b><br><br>Show the field ONLY if:<br>[conditions_post(7)] = '1'<br>and [pericarditis_diagnosis_pasc] = '1' | Copy and paste the language from the physician notes that states the Pericarditis diagnosis was due to PASC:[pericarditis_diagnosis_pasc_y]                               | descriptive, Required<br>Field Annotation: @HIDEBUTTON |
| 365 | <b>myositis_date_followup_adj</b><br><br>Show the field ONLY if:<br>[conditions_post(8)] = '1'                                                   | Enter the first and second (when applicable) Myositis diagnosis date found during the follow-up period:<br>[myositis_date_followup] [myositis_date_followup_2]            | descriptive, Required<br>Field Annotation: @HIDEBUTTON |
| 366 | <b>myositis_endstatus_adj</b><br><br>Show the field ONLY if:<br>[conditions_post(8)] = '1'                                                       | At the end of the follow-up period, the Myositis was:<br>[myositis_endstatus]                                                                                             | descriptive, Required<br>Field Annotation: @HIDEBUTTON |
| 367 | <b>myositis_diagnosis_pasc_adj</b><br><br>Show the field ONLY if:<br>[conditions_post(8)] = '1'                                                  | Did the physician state in the notes whether the Myositis diagnosis was due to PASC?<br>[myositis_diagnosis_pasc]                                                         | descriptive, Required<br>Field Annotation: @HIDEBUTTON |
| 368 | <b>myositis_diagnosis_pasc_y_adj</b><br><br>Show the field ONLY if:<br>[conditions_post(8)] = '1'<br>and [myositis_diagnosis_pasc] = '1'         | Copy and paste the language from the notes that states the Myositis diagnosis was due to PASC:<br>[myositis_diagnosis_pasc_y]                                             | descriptive, Required<br>Field Annotation: @HIDEBUTTON |
| 369 | <b>illheart_date_followup_adj</b>                                                                                                                | Enter the first and second (when applicable) Other/ill-defined heart disease diagnosis date found during the follow-up period:[illheart_date_followup]                    | descriptive, Required<br>Field Annotation: @HIDEBUTTON |

|     |                                                                                                                                          |                                                                                                                                                                                         |                                                        |
|-----|------------------------------------------------------------------------------------------------------------------------------------------|-----------------------------------------------------------------------------------------------------------------------------------------------------------------------------------------|--------------------------------------------------------|
|     | Show the field ONLY if:<br>[conditions_post(9)] = '1'                                                                                    | [illheart_date_followup_2]                                                                                                                                                              |                                                        |
| 370 | <b>illheart_endstatus_adj</b><br><br>Show the field ONLY if:<br>[conditions_post(9)] = '1'                                               | At the end of the follow-up period, the Other/ill-defined heart disease was:[illheart_endstatus]                                                                                        | descriptive, Required<br>Field Annotation: @HIDEBUTTON |
| 371 | <b>illheart_diagnosis_pasc_adj</b><br><br>Show the field ONLY if:<br>[conditions_post(9)] = '1'                                          | Did the physician state in the notes whether the Other/ill-defined heart disease diagnosis was due to PASC?[illheart_diagnosis_pasc]                                                    | descriptive, Required<br>Field Annotation: @HIDEBUTTON |
| 372 | <b>illheart_diagnosis_pasc_y_adj</b><br><br>Show the field ONLY if:<br>[conditions_post(9)] = '1'<br>and [illheart_diagnosis_pasc] = '1' | Copy and paste the language from the notes that states the Other/ill-defined heart disease diagnosis was due to PASC:[illheart_diagnosis_pasc_y]                                        | descriptive, Required<br>Field Annotation: @HIDEBUTTON |
| 373 | <b>thrombo_date_followup_adj</b><br><br>Show the field ONLY if:<br>[conditions_post(10)] = '1'                                           | Enter the first and second (when applicable) Thrombophlebitis/thromboembolism diagnosis date found during the follow-up period:<br>[thrombo_date_followup]<br>[thrombo_date_followup_2] | descriptive, Required<br>Field Annotation: @HIDEBUTTON |
| 374 | <b>thrombo_endstatus_adj</b><br><br>Show the field ONLY if:<br>[conditions_post(10)] = '1'                                               | At the end of the follow-up period, the Thrombophlebitis/thromboembolism was:<br>[thrombo_endstatus]                                                                                    | descriptive, Required<br>Field Annotation: @HIDEBUTTON |
| 375 | <b>thrombo_diagnosis_pasc_adj</b><br><br>Show the field ONLY if:<br>[conditions_post(10)] = '1'                                          | Did the physician state in the notes whether the Thrombophlebitis/thromboembolism diagnosis was due to PASC?[thrombo_diagnosis_pasc]                                                    | descriptive, Required<br>Field Annotation: @HIDEBUTTON |
| 376 | <b>thrombo_diagnosis_pasc_y_adj</b><br><br>Show the field ONLY if:<br>[conditions_post(10)] = '1'<br>and [thrombo_diagnosis_pasc] = '1'  | Copy and paste the language from the notes that states the Thrombophlebitis/thromboembolism diagnosis was due to PASC:<br>[thrombo_diagnosis_pasc_y]                                    | descriptive, Required<br>Field Annotation: @HIDEBUTTON |
| 377 | <b>anemia_date_followup_adj</b><br><br>Show the field ONLY if:<br>[conditions_post(11)] = '1'                                            | Enter the first and second (when applicable) Aplastic anemia diagnosis date found during the follow-up period:[anemia_date_followup]<br>[anemia_date_followup_2]                        | descriptive, Required<br>Field Annotation: @HIDEBUTTON |
| 378 | <b>anemia_endstatus_adj</b><br><br>Show the field ONLY if:<br>[conditions_post(11)] = '1'                                                | At the end of the follow-up period, the Aplastic anemia was:[anemia_endstatus]                                                                                                          | descriptive, Required<br>Field Annotation: @HIDEBUTTON |

|     |                                                                                                                                    |                                                                                                                                                                               |                                                        |
|-----|------------------------------------------------------------------------------------------------------------------------------------|-------------------------------------------------------------------------------------------------------------------------------------------------------------------------------|--------------------------------------------------------|
|     | 1'                                                                                                                                 |                                                                                                                                                                               |                                                        |
| 379 | <b>anemia_diagnosis_pasc_adj</b><br>Show the field ONLY if:<br>[conditions_post(11)] = '1'                                         | Did the physician state in the notes whether the Aplastic anemia diagnosis was due to PASC?<br>[anemia_diagnosis_pasc]                                                        | descriptive, Required<br>Field Annotation: @HIDEBUTTON |
| 380 | <b>anemia_diagnosis_pasc_y_adj</b><br>Show the field ONLY if:<br>[conditions_post(11)] = '1' and [anemia_diagnosis_pasc] = '1'     | Copy and paste the language from the notes that states the Aplastic anemia diagnosis was due to PASC:[anemia_diagnosis_pasc_y]                                                | descriptive, Required<br>Field Annotation: @HIDEBUTTON |
| 381 | <b>brainfog_date_followup_adj</b><br>Show the field ONLY if:<br>[conditions_post(12)] = '1'                                        | Enter the first and second (when applicable) Brain fog diagnosis date found during the follow-up period:[brainfog_date_followup]<br>[brainfog_date_followup_2]                | descriptive, Required<br>Field Annotation: @HIDEBUTTON |
| 382 | <b>brainfog_endstatus_adj</b><br>Show the field ONLY if:<br>[conditions_post(12)] = '1'                                            | At the end of the follow-up period, the Brain fog was:<br>[brainfog_endstatus]                                                                                                | descriptive, Required<br>Field Annotation: @HIDEBUTTON |
| 383 | <b>brainfog_diagnosis_pasc_adj</b><br>Show the field ONLY if:<br>[conditions_post(12)] = '1'                                       | Did the physician state in the notes whether the Brain fog diagnosis was due to PASC?<br>[brainfog_diagnosis_pasc]                                                            | descriptive, Required<br>Field Annotation: @HIDEBUTTON |
| 384 | <b>brainfog_diagnosis_pasc_y_adj</b><br>Show the field ONLY if:<br>[conditions_post(12)] = '1' and [brainfog_diagnosis_pasc] = '1' | Copy and paste the language from the notes that states the Brain fog diagnosis was due to PASC:<br>[brainfog_diagnosis_pasc_y]                                                | descriptive, Required<br>Field Annotation: @HIDEBUTTON |
| 385 | <b>liverenzy_date_followup_adj</b><br>Show the field ONLY if:<br>[conditions_post(13)] = '1'                                       | Enter the first and second (when applicable) Abnormal liver enzymes diagnosis date found during the follow-up period:[liverenzy_date_followup]<br>[liverenzy_date_followup_2] | descriptive, Required<br>Field Annotation: @HIDEBUTTON |
| 386 | <b>liverenzy_endstatus_adj</b><br>Show the field ONLY if:<br>[conditions_post(13)] = '1'                                           | At the end of the follow-up period, the Abnormal liver enzymes were:[liverenzy_endstatus]                                                                                     | descriptive, Required<br>Field Annotation: @HIDEBUTTON |
| 387 | <b>liverenzy_diagnosis_pasc_adj</b>                                                                                                | Did the physician state in the notes whether the Abnormal liver enzymes diagnosis was due to PASC?<br>[liverenzy_diagnosis_pasc]                                              | descriptive, Required<br>Field Annotation: @HIDEBUTTON |

|     |                                                                                                                                                |                                                                                                                                                                        |                                                        |
|-----|------------------------------------------------------------------------------------------------------------------------------------------------|------------------------------------------------------------------------------------------------------------------------------------------------------------------------|--------------------------------------------------------|
|     | Show the field ONLY if:<br>[conditions_post(13)] = '1'                                                                                         |                                                                                                                                                                        |                                                        |
| 388 | <b>liverenzy_diagnosis_pasc_y_adj</b><br><br>Show the field ONLY if:<br>[conditions_post(13)] = '1' and [liverenzy_diagnosis_pasc] = '1'       | Copy and paste the language from the notes that states the Abnormal liver enzymes diagnosis was due to PASC:[liverenzy_diagnosis_pasc_y]                               | descriptive, Required<br>Field Annotation: @HIDEBUTTON |
| 389 | <b>dysautonomia_date_followup_adj</b><br><br>Show the field ONLY if:<br>[conditions_post(14)] = '1'                                            | Enter the first and second (when applicable) Dysautonomia diagnosis date found during the follow-up period:[dysautonomia_date_followup] [dysautonomia_date_followup_2] | descriptive, Required<br>Field Annotation: @HIDEBUTTON |
| 390 | <b>dysautonomia_endstatus_adj</b><br><br>Show the field ONLY if:<br>[conditions_post(14)] = '1'                                                | At the end of the follow-up period, the Dysautonomia was:[dysautonomia_endstatus]                                                                                      | descriptive, Required<br>Field Annotation: @HIDEBUTTON |
| 391 | <b>dysautonomia_diagnosis_pasc_adj</b><br><br>Show the field ONLY if:<br>[conditions_post(14)] = '1'                                           | Did the physician state in the notes whether the Dysautonomia diagnosis was due to PASC?<br>[dysautonomia_diagnosis_pasc]                                              | descriptive, Required<br>Field Annotation: @HIDEBUTTON |
| 392 | <b>dysautonomia_diagnosis_pasc_y_adj</b><br><br>Show the field ONLY if:<br>[conditions_post(14)] = '1' and [dysautonomia_diagnosis_pasc] = '1' | Copy and paste the language from the notes that states the Dysautonomia diagnosis was due to PASC:<br>[dysautonomia_diagnosis_pasc_y]                                  | descriptive, Required<br>Field Annotation: @HIDEBUTTON |
| 393 | <b>fatigue_date_followup_adj</b><br><br>Show the field ONLY if:<br>[conditions_post(15)] = '1'                                                 | Enter the first and second (when applicable) Fatigue diagnosis date found during the follow-up period:<br>[fatigue_date_followup] [fatigue_date_followup_2]            | descriptive, Required<br>Field Annotation: @HIDEBUTTON |
| 394 | <b>fatigue_endstatus_adj</b><br><br>Show the field ONLY if:<br>[conditions_post(15)] = '1'                                                     | At the end of the follow-up period, the Fatigue was:<br>[fatigue_endstatus]                                                                                            | descriptive, Required<br>Field Annotation: @HIDEBUTTON |
| 395 | <b>fatigue_diagnosis_pasc_adj</b><br><br>Show the field ONLY if:<br>[conditions_post(15)] = '1'                                                | Did the physician state in the notes whether the Fatigue diagnosis was due to PASC?<br>[fatigue_diagnosis_pasc]                                                        | descriptive, Required<br>Field Annotation: @HIDEBUTTON |
| 396 | <b>fatigue_diagnosis_pasc_y_adj</b>                                                                                                            | Copy and paste the language from the notes that                                                                                                                        | descriptive, Required                                  |

|     |                                                                                                                                      |                                                                                                                                                             |                                                        |
|-----|--------------------------------------------------------------------------------------------------------------------------------------|-------------------------------------------------------------------------------------------------------------------------------------------------------------|--------------------------------------------------------|
|     | <b>asc_y_adj</b><br>Show the field ONLY if:<br>[conditions_post(15)] = '1' and [fatigue_diagnosis_pasc] = '1'                        | states the Fatigue diagnosis was due to PASC:<br>[fatigue_diagnosis_pasc_y]                                                                                 | Field Annotation: @HIDEBUTTON                          |
| 397 | <b>abdominal_date_followup_adj</b><br>Show the field ONLY if:<br>[conditions_post(19)] = '1'                                         | Enter the first and second (when applicable) Abdominal Pain date found during the follow-up period:[abdominal_date_followup]<br>[abdominal_date_followup_2] | descriptive, Required<br>Field Annotation: @HIDEBUTTON |
| 398 | <b>abdominal_endstatus_adj</b><br>Show the field ONLY if:<br>[conditions_post(19)] = '1'                                             | At the end of the follow-up period, the Abdominal Pain was:[abdominal_endstatus]                                                                            | descriptive, Required<br>Field Annotation: @HIDEBUTTON |
| 399 | <b>abdominal_diagnosis_pasc_adj</b><br>Show the field ONLY if:<br>[conditions_post(19)] = '1'                                        | Did the physician state in the notes whether the Abdominal Pain diagnosis was due to PASC?<br>[abdominal_diagnosis_pasc]                                    | descriptive, Required<br>Field Annotation: @HIDEBUTTON |
| 400 | <b>abdominal_diagnosis_pasc_y_adj</b><br>Show the field ONLY if:<br>[conditions_post(19)] = '1' and [abdominal_diagnosis_pasc] = '1' | Copy and paste the language from the notes that states the Abdominal Pain diagnosis was due to PASC:[abdominal_diagnosis_pasc_y]                            | descriptive, Required<br>Field Annotation: @HIDEBUTTON |
| 401 | <b>aki_date_followup_adj</b><br>Show the field ONLY if:<br>[conditions_post(20)] = '1'                                               | Enter the first and second (when applicable) Acute Kidney Injury diagnosis date found during the follow-up period:[aki_date_followup] [aki_date_followup_2] | descriptive, Required<br>Field Annotation: @HIDEBUTTON |
| 402 | <b>aki_endstatus_adj</b><br>Show the field ONLY if:<br>[conditions_post(20)] = '1'                                                   | At the end of the follow-up period, the Acute Kidney Injury was:[aki_endstatus]                                                                             | descriptive, Required<br>Field Annotation: @HIDEBUTTON |
| 403 | <b>aki_diagnosis_pasc_adj</b><br>Show the field ONLY if:<br>[conditions_post(20)] = '1'                                              | Did the physician state in the notes whether the Acute Kidney Injury diagnosis was due to PASC?<br>[aki_diagnosis_pasc]                                     | descriptive, Required<br>Field Annotation: @HIDEBUTTON |
| 404 | <b>aki_diagnosis_pasc_y_adj</b><br>Show the field ONLY if:<br>[conditions_post(20)] = '1' and [aki_diagnosis_pasc] = '1'             | Copy and paste the language from the notes that states the Acute Kidney Injury diagnosis was due to PASC:[aki_diagnosis_pasc_y]                             | descriptive, Required<br>Field Annotation: @HIDEBUTTON |

|     |                                                                                                            |                                                                                                                                                                                       |                                                        |
|-----|------------------------------------------------------------------------------------------------------------|---------------------------------------------------------------------------------------------------------------------------------------------------------------------------------------|--------------------------------------------------------|
| 405 | <b>abnormal_lab_adj</b><br>Show the field ONLY if:<br>[covid] = '1'                                        | Did the patient have at least one occurrence of the following abnormal lab tests, on Day 28 or later after initial COVID-19 positive diagnosis? Select all that apply. [abnormal_lab] | descriptive                                            |
| 406 | <b>reason_thrombo_test_adj</b><br>Show the field ONLY if:<br>[covid] = '1' and [abnormal_lab(1)] = '1'     | Select the reason why the patient was tested for Thrombocytopenia:[reason_thrombo_test]                                                                                               | descriptive, Required                                  |
| 407 | <b>date_thrombo_test_adj</b><br>Show the field ONLY if:<br>[covid] = '1' and [abnormal_lab(1)] = '1'       | Enter the Thrombocytopenia test date:<br>[date_thrombo_test]                                                                                                                          | descriptive, Required<br>Field Annotation: @HIDEBUTTON |
| 408 | <b>reason_troponin_test_adj</b><br>Show the field ONLY if:<br>[covid] = '1' and [abnormal_lab(2)] = '1'    | Select the reason why the patient was tested for Elevated Troponin:[reason_troponin_test]                                                                                             | descriptive, Required                                  |
| 409 | <b>date_troponin_test_adj</b><br>Show the field ONLY if:<br>[covid] = '1' and [abnormal_lab(2)] = '1'      | Enter the Elevated Troponin test date:<br>[date_troponin_test]                                                                                                                        | descriptive, Required<br>Field Annotation: @HIDEBUTTON |
| 410 | <b>reason_lymphopenia_test_adj</b><br>Show the field ONLY if:<br>[covid] = '1' and [abnormal_lab(3)] = '1' | Select the reason why the patient was tested for Lymphopenia:[reason_lymphopenia_test]                                                                                                | descriptive, Required                                  |
| 411 | <b>date_lymphopenia_test_adj</b><br>Show the field ONLY if:<br>[covid] = '1' and [abnormal_lab(3)] = '1'   | Enter the Lymphopenia test date:<br>[date_lymphopenia_test]                                                                                                                           | descriptive, Required<br>Field Annotation: @HIDEBUTTON |
| 412 | <b>reason_crp_test_adj</b><br>Show the field ONLY if:<br>[covid] = '1' and [abnormal_lab(4)] = '1'         | Select the reason why the patient was tested for Elevated CRP:[reason_crp_test]                                                                                                       | descriptive, Required                                  |
| 413 | <b>date_crp_test_adj</b><br>Show the field ONLY if:<br>[covid] = '1' and [abnormal_lab(4)] = '1'           | Enter the Elevated CRP test date:[date_crp_test]                                                                                                                                      | descriptive, Required<br>Field Annotation: @HIDEBUTTON |
| 414 | <b>diagnosis_post_covid_adj</b>                                                                            | Did the patient have at least one occurrences of a diagnosis term for the following on Day 28 or later after COVID positive diagnosis? Select all that apply.                         | descriptive                                            |

|     |                                                                                                                                        |                                                                                                                            |                                                        |
|-----|----------------------------------------------------------------------------------------------------------------------------------------|----------------------------------------------------------------------------------------------------------------------------|--------------------------------------------------------|
|     | Show the field ONLY if:<br>[covid] = '1'                                                                                               | [diagnosis_post_covid]                                                                                                     |                                                        |
| 415 | <b>chestpain_date_adj</b><br>Show the field ONLY if:<br>[covid] = '1' and [diagnosis_post_covid(1)] = '1'                              | Enter the date of the first and second Chest Pain diagnosis:[chestpain_date] [chestpain_date_2]                            | descriptive, Required<br>Field Annotation: @HIDEBUTTON |
| 416 | <b>chestpain_endstatus_adj</b><br>Show the field ONLY if:<br>[covid] = '1' and [diagnosis_post_covid(1)] = '1'                         | At the end of the follow-up period, the Chest Pain was:[chestpain_endstatus]                                               | descriptive, Required<br>Field Annotation: @HIDEBUTTON |
| 417 | <b>chestpain_pasc_adj</b><br>Show the field ONLY if:<br>[covid] = '1' and [diagnosis_post_covid(1)] = '1'                              | Did the physician state in the notes whether the Chest Pain was related to PASC?[chestpain_pasc]                           | descriptive, Required<br>Field Annotation: @HIDEBUTTON |
| 418 | <b>chestpain_pasc_y_adj</b><br>Show the field ONLY if:<br>[covid] = '1' and [diagnosis_post_covid(1)] = '1' and [chestpain_pasc] = '1' | Copy and paste the language from the notes that states the Chest Pain diagnosis was related to PASC:<br>[chestpain_pasc_y] | descriptive, Required<br>Field Annotation: @HIDEBUTTON |
| 419 | <b>hairloss_date_adj</b><br>Show the field ONLY if:<br>[covid] = '1' and [diagnosis_post_covid(2)] = '1'                               | Enter the date of the first and second Hair Loss diagnosis:[hairloss_date] [hairloss_date_2]                               | descriptive, Required<br>Field Annotation: @HIDEBUTTON |
| 420 | <b>hairloss_endstatus_adj</b><br>Show the field ONLY if:<br>[covid] = '1' and [diagnosis_post_covid(2)] = '1'                          | At the end of the follow-up period, the Hair Loss was:<br>[hairloss_endstatus]                                             | descriptive, Required<br>Field Annotation: @HIDEBUTTON |
| 421 | <b>hairloss_pasc_adj</b><br>Show the field ONLY if:<br>[covid] = '1' and [diagnosis_post_covid(2)] = '1'                               | Did the physician state in the notes whether the Hair Loss was related to PASC?[hairloss_pasc]                             | descriptive, Required<br>Field Annotation: @HIDEBUTTON |
| 422 | <b>hairloss_pasc_y_adj</b><br>Show the field ONLY if:<br>[covid] = '1' and [diagnosis_post_covid(2)] = '1' and [hairloss_pasc] = '1'   | Copy and paste the language from the notes that states the Hair Loss diagnosis was related to PASC:<br>[hairloss_pasc_y]   | descriptive, Required<br>Field Annotation: @HIDEBUTTON |
| 423 | <b>cough_date_adj</b><br>Show the field ONLY if:<br>[covid] = '1' and [diagnosis_post_covid(3)] = '1'                                  | Enter the date of the first and second Cough diagnosis:[cough_date] [cough_date_2]                                         | descriptive, Required<br>Field Annotation: @HIDEBUTTON |
| 424 | <b>cough_endstatus_adj</b>                                                                                                             | At the end of the follow-up period, the Cough was:                                                                         | descriptive, Required                                  |

|     |                                                                                                                                          |                                                                                                                                          |                                                        |
|-----|------------------------------------------------------------------------------------------------------------------------------------------|------------------------------------------------------------------------------------------------------------------------------------------|--------------------------------------------------------|
|     | <b>j</b><br>Show the field ONLY if:<br>[covid] = '1' and [diagnosis_post_covid(3)] = '1'                                                 | [cough_endstatus]                                                                                                                        | Field Annotation: @HIDEBUTTON                          |
| 425 | <b>cough_pasc_adj</b><br>Show the field ONLY if:<br>[covid] = '1' and [diagnosis_post_covid(3)] = '1'                                    | Did the physician state in the notes whether the Cough was related to PASC?[cough_pasc]                                                  | descriptive, Required<br>Field Annotation: @HIDEBUTTON |
| 426 | <b>cough_pasc_y_adj</b><br>Show the field ONLY if:<br>[covid] = '1' and [diagnosis_post_covid(3)] = '1' and [cough_pasc] = '1'           | Copy and paste the language from the notes that states the Cough diagnosis was related to PASC:<br>[cough_pasc_y]                        | descriptive, Required<br>Field Annotation: @HIDEBUTTON |
| 427 | <b>cardio_signs_date_adj</b><br>Show the field ONLY if:<br>[covid] = '1' and [diagnosis_post_covid(4)] = '1'                             | Enter the date of the first and second Cardiorespiratory signs and symptoms:<br>[cardio_signs_date] [cardio_signs_date_2]                | descriptive, Required<br>Field Annotation: @HIDEBUTTON |
| 428 | <b>cardioresp_endstatus_adj</b><br>Show the field ONLY if:<br>[covid] = '1' and [diagnosis_post_covid(4)] = '1'                          | At the end of the follow-up period, the Cardiorespiratory signs and symptoms were:<br>[cardioresp_endstatus]                             | descriptive, Required<br>Field Annotation: @HIDEBUTTON |
| 429 | <b>cardioresp_pasc_adj</b><br>Show the field ONLY if:<br>[covid] = '1' and [diagnosis_post_covid(4)] = '1'                               | Did the physician state in the notes whether the Cardiorespiratory signs and symptoms were related to PASC?[cardioresp_pasc]             | descriptive, Required<br>Field Annotation: @HIDEBUTTON |
| 430 | <b>cardioresp_pasc_y_adj</b><br>Show the field ONLY if:<br>[covid] = '1' and [diagnosis_post_covid(4)] = '1' and [cardioresp_pasc] = '1' | Copy and paste the language from the notes that states the Cardiorespiratory signs and symptoms were related to PASC:[cardioresp_pasc_y] | descriptive, Required<br>Field Annotation: @HIDEBUTTON |
| 431 | <b>jaundice_date_adj</b><br>Show the field ONLY if:<br>[covid] = '1' and [diagnosis_post_covid(5)] = '1'                                 | Enter the date of the first and second Jaundice diagnosis:[jaundice_date] [jaundice_date_2]                                              | descriptive, Required<br>Field Annotation: @HIDEBUTTON |
| 432 | <b>jaundice_endstatus_adj</b><br>Show the field ONLY if:<br>[covid] = '1' and [diagnosis_post_covid(5)] = '1'                            | At the end of the follow-up period, the Jaundice was:<br>[jaundice_endstatus]                                                            | descriptive, Required<br>Field Annotation: @HIDEBUTTON |
| 433 | <b>jaundice_pasc_adj</b><br>Show the field ONLY if:                                                                                      | Did the physician state in the notes whether the Jaundice was related to PASC?[jaundice_pasc]                                            | descriptive, Required<br>Field Annotation: @HIDEBUTTON |

|     |                                                                                                                                          |                                                                                                                       |                                                        |
|-----|------------------------------------------------------------------------------------------------------------------------------------------|-----------------------------------------------------------------------------------------------------------------------|--------------------------------------------------------|
|     | [covid] = '1' and [diagnosis_post_covid(5)] = '1'                                                                                        |                                                                                                                       |                                                        |
| 434 | <b>jaundice_pasc_y_adj</b><br><br>Show the field ONLY if:<br>[covid] = '1' and [diagnosis_post_covid(5)] = '1' and [jaundice_pasc] = '1' | Copy and paste the language from the notes that states the Jaundice was related to PASC:<br>[jaundice_pasc_y]         | descriptive, Required<br>Field Annotation: @HIDEBUTTON |
| 435 | <b>pain_date_adj</b><br><br>Show the field ONLY if:<br>[covid] = '1' and [diagnosis_post_covid(6)] = '1'                                 | Enter the date of the first and second Generalized Pain diagnosis:[pain_date] [pain_date_2]                           | descriptive, Required<br>Field Annotation: @HIDEBUTTON |
| 436 | <b>pain_endstatus_adj</b><br><br>Show the field ONLY if:<br>[covid] = '1' and [diagnosis_post_covid(6)] = '1'                            | At the end of the follow-up period, the Generalized Pain was:[pain_endstatus]                                         | descriptive, Required<br>Field Annotation: @HIDEBUTTON |
| 437 | <b>pain_pasc_adj</b><br><br>Show the field ONLY if:<br>[covid] = '1' and [diagnosis_post_covid(6)] = '1'                                 | Did the physician state in the notes whether the Generalized Pain was related to PASC?[pain_pasc]                     | descriptive, Required<br>Field Annotation: @HIDEBUTTON |
| 438 | <b>pain_pasc_y_adj</b><br><br>Show the field ONLY if:<br>[covid] = '1' and [diagnosis_post_covid(6)] = '1' and [pain_pasc] = '1'         | Copy and paste the language from the notes that states the Generalized Pain was related to PASC:<br>[pain_pasc_y]     | descriptive, Required<br>Field Annotation: @HIDEBUTTON |
| 439 | <b>anxiety_date_adj</b><br><br>Show the field ONLY if:<br>[covid] = '1' and [diagnosis_post_covid(7)] = '1'                              | Enter the date of the first and second Anxiety symptoms:[anxiety_date] [anxiety_date_2]                               | descriptive, Required<br>Field Annotation: @HIDEBUTTON |
| 440 | <b>anxiety_endstatus_adj</b><br><br>Show the field ONLY if:<br>[covid] = '1' and [diagnosis_post_covid(7)] = '1'                         | At the end of the follow-up period, the Anxiety Symptoms were:[anxiety_endstatus]                                     | descriptive, Required<br>Field Annotation: @HIDEBUTTON |
| 441 | <b>anxiety_pasc_adj</b><br><br>Show the field ONLY if:<br>[covid] = '1' and [diagnosis_post_covid(7)] = '1'                              | Did the physician state in the notes whether the Anxiety Symptoms were related to PASC?<br>[anxiety_pasc]             | descriptive, Required<br>Field Annotation: @HIDEBUTTON |
| 442 | <b>anxiety_pasc_y_adj</b><br><br>Show the field ONLY if:<br>[covid] = '1' and [diagnosis_post_covid(7)] = '1' and [anxiety_pasc] = '1'   | Copy and paste the language from the notes that states the Anxiety symptoms were related to PASC:<br>[anxiety_pasc_y] | descriptive, Required<br>Field Annotation: @HIDEBUTTON |
| 443 | <b>fatigue_malaise_dat</b>                                                                                                               | Enter the date of the first and second                                                                                | descriptive, Required                                  |

|     |                                                                                                                                                    |                                                                                                                                   |                                                        |
|-----|----------------------------------------------------------------------------------------------------------------------------------------------------|-----------------------------------------------------------------------------------------------------------------------------------|--------------------------------------------------------|
|     | <b>e_adj</b><br>Show the field ONLY if:<br>[covid] = '1' and [diagnosis_post_covid(8)] = '1'                                                       | Fatigue/Malaise diagnosis:[fatigue_malaise_date]<br>[fatigue_malaise_date_2]                                                      | Field Annotation: @HIDEBUTTON                          |
| 444 | <b>fatigue_malaise_endstatus_adj</b><br>Show the field ONLY if:<br>[covid] = '1' and [diagnosis_post_covid(8)] = '1'                               | At the end of the follow-up period, the Fatigue/Malaise Symptoms were:<br>[fatigue_malaise_endstatus]                             | descriptive, Required<br>Field Annotation: @HIDEBUTTON |
| 445 | <b>fatigue_malaise_pasc_adj</b><br>Show the field ONLY if:<br>[covid] = '1' and [diagnosis_post_covid(8)] = '1'                                    | Did the physician state in the notes whether the Fatigue/Malaise Symptoms were related to PASC?<br>[fatigue_malaise_pasc]         | descriptive, Required<br>Field Annotation: @HIDEBUTTON |
| 446 | <b>fatigue_malaise_pasc_y_adj</b><br>Show the field ONLY if:<br>[covid] = '1' and [diagnosis_post_covid(8)] = '1' and [fatigue_malaise_pasc] = '1' | Copy and paste the language from the notes that states the Fatigue/Malaise symptoms were related to PASC:[fatigue_malaise_pasc_y] | descriptive, Required<br>Field Annotation: @HIDEBUTTON |
| 447 | <b>diarrhea_date_adj</b><br>Show the field ONLY if:<br>[covid] = '1' and [diagnosis_post_covid(9)] = '1'                                           | Enter the date of the first and second Diarrhea diagnosis:[diarrhea_date] [diarrhea_date_2]                                       | descriptive, Required<br>Field Annotation: @HIDEBUTTON |
| 448 | <b>diarrhea_endstatus_adj</b><br>Show the field ONLY if:<br>[covid] = '1' and [diagnosis_post_covid(9)] = '1'                                      | At the end of the follow-up period, the Diarrhea was:<br>[diarrhea_endstatus]                                                     | descriptive, Required<br>Field Annotation: @HIDEBUTTON |
| 449 | <b>diarrhea_pasc_adj</b><br>Show the field ONLY if:<br>[covid] = '1' and [diagnosis_post_covid(9)] = '1'                                           | Did the physician state in the notes whether the Diarrhea was related to PASC?[diarrhea_pasc]                                     | descriptive, Required<br>Field Annotation: @HIDEBUTTON |
| 450 | <b>diarrhea_pasc_y_adj</b><br>Show the field ONLY if:<br>[covid] = '1' and [diagnosis_post_covid(9)] = '1' and [diarrhea_pasc] = '1'               | Copy and paste the language from the notes that states the Diarrhea was related to PASC:<br>[diarrhea_pasc_y]                     | descriptive, Required<br>Field Annotation: @HIDEBUTTON |
| 451 | <b>fever_chills_date_adj</b><br>Show the field ONLY if:<br>[covid] = '1' and [diagnosis_post_covid(10)] = '1'                                      | Enter the date of the first and second Fever/Chills diagnosis:[fever_chills_date] [fever_chills_date_2]                           | descriptive, Required<br>Field Annotation: @HIDEBUTTON |
| 452 | <b>fever_chills_endsta</b>                                                                                                                         | At the end of the follow-up period, the Fever/Chills                                                                              | descriptive, Required                                  |

|     |                                                                                                                                               |                                                                                                                        |                                                        |
|-----|-----------------------------------------------------------------------------------------------------------------------------------------------|------------------------------------------------------------------------------------------------------------------------|--------------------------------------------------------|
|     | <b>tus_adj</b><br>Show the field ONLY if:<br>[covid] = '1' and [diagnosis_post_covid(10)] = '1'                                               | were:[fever_chills_endstatus]                                                                                          | Field Annotation: @HIDEBUTTON                          |
| 453 | <b>fever_chills_pasc_adj</b><br>Show the field ONLY if:<br>[covid] = '1' and [diagnosis_post_covid(10)] = '1'                                 | Did the physician state in the notes whether the Fever/Chills were related to PASC?[fever_chills_pasc]                 | descriptive, Required<br>Field Annotation: @HIDEBUTTON |
| 454 | <b>fever_chills_pasc_y_adj</b><br>Show the field ONLY if:<br>[covid] = '1' and [diagnosis_post_covid(10)] = '1' and [fever_chills_pasc] = '1' | Copy and paste the language from the notes that states the Fever/Chills were related to PASC:<br>[fever_chills_pasc_y] | descriptive, Required<br>Field Annotation: @HIDEBUTTON |
| 455 | <b>skin_rash_date_adj</b><br>Show the field ONLY if:<br>[covid] = '1' and [diagnosis_post_covid(11)] = '1'                                    | Enter the date of the first and second Skin Rash diagnosis:[skin_rash_date] [skin_rash_date_2]                         | descriptive, Required<br>Field Annotation: @HIDEBUTTON |
| 456 | <b>skinrash_endstatus_adj</b><br>Show the field ONLY if:<br>[covid] = '1' and [diagnosis_post_covid(11)] = '1'                                | At the end of the follow-up period, the Skin Rash was:[skinrash_endstatus]                                             | descriptive, Required<br>Field Annotation: @HIDEBUTTON |
| 457 | <b>skin_rash_pasc_adj</b><br>Show the field ONLY if:<br>[covid] = '1' and [diagnosis_post_covid(11)] = '1'                                    | Did the physician state in the notes whether the Skin Rash was related to PASC?[skin_rash_pasc]                        | descriptive, Required<br>Field Annotation: @HIDEBUTTON |
| 458 | <b>skin_rash_pasc_y_adj</b><br>Show the field ONLY if:<br>[covid] = '1' and [diagnosis_post_covid(11)] = '1' and [skin_rash_pasc] = '1'       | Copy and paste the language from the notes that states the Skin Rash was related to PASC:<br>[skin_rash_pasc_y]        | descriptive, Required<br>Field Annotation: @HIDEBUTTON |
| 459 | <b>headache_date_adj</b><br>Show the field ONLY if:<br>[covid] = '1' and [diagnosis_post_covid(12)] = '1'                                     | Enter the date of the first and second Headache diagnosis:[headache_date] [headache_date_2]                            | descriptive, Required<br>Field Annotation: @HIDEBUTTON |
| 460 | <b>headache_endstatus_adj</b><br>Show the field ONLY if:<br>[covid] = '1' and [diagnosis_post_covid(12)] = '1'                                | At the end of the follow-up period, the Headache was:[headache_endstatus]                                              | descriptive, Required<br>Field Annotation: @HIDEBUTTON |
| 461 | <b>headache_pasc_adj</b>                                                                                                                      | Did the physician state in the notes whether the                                                                       | descriptive, Required                                  |

|     |                                                                                                                                 |                                                                                                                                                                                                                                                                                                                                                                                                                                                                                                                                                                                                                                                                                                                                                                                                                            |                                                                                                                                                                                         |   |            |   |          |   |          |   |    |
|-----|---------------------------------------------------------------------------------------------------------------------------------|----------------------------------------------------------------------------------------------------------------------------------------------------------------------------------------------------------------------------------------------------------------------------------------------------------------------------------------------------------------------------------------------------------------------------------------------------------------------------------------------------------------------------------------------------------------------------------------------------------------------------------------------------------------------------------------------------------------------------------------------------------------------------------------------------------------------------|-----------------------------------------------------------------------------------------------------------------------------------------------------------------------------------------|---|------------|---|----------|---|----------|---|----|
|     | Show the field ONLY if: [covid] = '1' and [diagnosis_post_covid(12)] = '1'                                                      | Headache was related to PASC?[headache_pasc]                                                                                                                                                                                                                                                                                                                                                                                                                                                                                                                                                                                                                                                                                                                                                                               | Field Annotation: @HIDEBUTTON                                                                                                                                                           |   |            |   |          |   |          |   |    |
| 462 | headache_pasc_y_adj<br><br>Show the field ONLY if: [covid] = '1' and [diagnosis_post_covid(12)] = '1' and [headache_pasc] = '1' | Copy and paste the language from the notes that states the Headache was related to PASC: [headache_pasc_y]                                                                                                                                                                                                                                                                                                                                                                                                                                                                                                                                                                                                                                                                                                                 | descriptive, Required<br>Field Annotation: @HIDEBUTTON                                                                                                                                  |   |            |   |          |   |          |   |    |
| 463 | other_pasc_adj                                                                                                                  | Is there any additional information in the patient's chart about their PASC status that you think is relevant? If so, please enter below, ensuring that any PHI (names, MRNs, etc) is removed. [other_pasc]                                                                                                                                                                                                                                                                                                                                                                                                                                                                                                                                                                                                                | descriptive                                                                                                                                                                             |   |            |   |          |   |          |   |    |
| 464 | care_everywhere_adj                                                                                                             | Is there any additional information in Care Everywhere about this patient's PASC status? [care_everywhere]                                                                                                                                                                                                                                                                                                                                                                                                                                                                                                                                                                                                                                                                                                                 | descriptive, Required                                                                                                                                                                   |   |            |   |          |   |          |   |    |
| 465 | optional_notes_adj                                                                                                              | Optional- add any additional comments about this patient's chart. [optional_notes]                                                                                                                                                                                                                                                                                                                                                                                                                                                                                                                                                                                                                                                                                                                                         | descriptive                                                                                                                                                                             |   |            |   |          |   |          |   |    |
| 466 | long_covid_def                                                                                                                  | Section Header: <i>Long Covid Definition</i><br><br>According its federal definition, Long COVID is defined as signs, symptoms, and conditions that continue or develop after initial COVID-19 or SARS-CoV-2 infection. The signs, symptoms, and conditions are present four weeks [28 days] or more after the initial phase of infection; may be multisystemic; and may present with a relapsing- remitting pattern and progression or worsening over time, with the possibility of severe and life-threatening events even months or years after infection. Long COVID is not one condition. It represents many potentially overlapping entities, likely with different biological causes and different sets of risk factors and outcomes<br><br>According to this definition, do you think this patient has Long COVID? | dropdown<br><table border="1"> <tr><td>1</td><td>Definitely</td></tr> <tr><td>2</td><td>Probably</td></tr> <tr><td>3</td><td>Possibly</td></tr> <tr><td>4</td><td>No</td></tr> </table> | 1 | Definitely | 2 | Probably | 3 | Possibly | 4 | No |
| 1   | Definitely                                                                                                                      |                                                                                                                                                                                                                                                                                                                                                                                                                                                                                                                                                                                                                                                                                                                                                                                                                            |                                                                                                                                                                                         |   |            |   |          |   |          |   |    |
| 2   | Probably                                                                                                                        |                                                                                                                                                                                                                                                                                                                                                                                                                                                                                                                                                                                                                                                                                                                                                                                                                            |                                                                                                                                                                                         |   |            |   |          |   |          |   |    |
| 3   | Possibly                                                                                                                        |                                                                                                                                                                                                                                                                                                                                                                                                                                                                                                                                                                                                                                                                                                                                                                                                                            |                                                                                                                                                                                         |   |            |   |          |   |          |   |    |
| 4   | No                                                                                                                              |                                                                                                                                                                                                                                                                                                                                                                                                                                                                                                                                                                                                                                                                                                                                                                                                                            |                                                                                                                                                                                         |   |            |   |          |   |          |   |    |
| 467 | long_covid_def_2                                                                                                                | According its federal definition, Long COVID is defined as signs, symptoms, and conditions that continue or develop after initial COVID-19 or SARS-CoV-2 infection. The signs, symptoms, and conditions are present four weeks [28 days] or more after the initial phase of infection; may be multisystemic; and may present with a relapsing- remitting pattern and progression or worsening over time, with the possibility of severe and life-threatening events even months or years after infection. Long COVID is not one condition. It represents many potentially overlapping entities, likely with different biological causes and different sets of risk factors and outcomes                                                                                                                                    | dropdown<br><table border="1"> <tr><td>1</td><td>Definitely</td></tr> <tr><td>2</td><td>Probably</td></tr> <tr><td>3</td><td>Possibly</td></tr> <tr><td>4</td><td>No</td></tr> </table> | 1 | Definitely | 2 | Probably | 3 | Possibly | 4 | No |
| 1   | Definitely                                                                                                                      |                                                                                                                                                                                                                                                                                                                                                                                                                                                                                                                                                                                                                                                                                                                                                                                                                            |                                                                                                                                                                                         |   |            |   |          |   |          |   |    |
| 2   | Probably                                                                                                                        |                                                                                                                                                                                                                                                                                                                                                                                                                                                                                                                                                                                                                                                                                                                                                                                                                            |                                                                                                                                                                                         |   |            |   |          |   |          |   |    |
| 3   | Possibly                                                                                                                        |                                                                                                                                                                                                                                                                                                                                                                                                                                                                                                                                                                                                                                                                                                                                                                                                                            |                                                                                                                                                                                         |   |            |   |          |   |          |   |    |
| 4   | No                                                                                                                              |                                                                                                                                                                                                                                                                                                                                                                                                                                                                                                                                                                                                                                                                                                                                                                                                                            |                                                                                                                                                                                         |   |            |   |          |   |          |   |    |

|     |                                                                                                                                                                  |                                                                                                                                                                                                                                                                                                                                                                                                                                                                                                                                                                                                                                                                                                                                                                                                                                                                                                                                                                                                                                                                                                                                                                                                                                                  |             |
|-----|------------------------------------------------------------------------------------------------------------------------------------------------------------------|--------------------------------------------------------------------------------------------------------------------------------------------------------------------------------------------------------------------------------------------------------------------------------------------------------------------------------------------------------------------------------------------------------------------------------------------------------------------------------------------------------------------------------------------------------------------------------------------------------------------------------------------------------------------------------------------------------------------------------------------------------------------------------------------------------------------------------------------------------------------------------------------------------------------------------------------------------------------------------------------------------------------------------------------------------------------------------------------------------------------------------------------------------------------------------------------------------------------------------------------------|-------------|
|     |                                                                                                                                                                  | According to this definition, do you think this patient has Long COVID?                                                                                                                                                                                                                                                                                                                                                                                                                                                                                                                                                                                                                                                                                                                                                                                                                                                                                                                                                                                                                                                                                                                                                                          |             |
| 468 | <p><b>long_covid_findings</b></p> <p>Show the field ONLY if:<br/>                 [long_covid_def] = '1' or [long_covid_def] = '2' or [long_covid_def] = '3'</p> | If you answered definitely, probably, or possibly, list the findings that you think merit the Long Covid diagnosis.                                                                                                                                                                                                                                                                                                                                                                                                                                                                                                                                                                                                                                                                                                                                                                                                                                                                                                                                                                                                                                                                                                                              | notes       |
| 469 | <b>rules1</b>                                                                                                                                                    | <p>Section Header: <i>Algorithm Rules to define PASC:</i></p> <p>Rules SARS-CoV-2 Infection Rule Fact of Infection Date of Infection Positive viral PCR Conclusive Yes Positive viral antigen Conclusive Yes Positive nucleocapsid serology Conclusive No Positive spike/nonspecific serology No No Specific COVID19 diagnosis Conclusive Yes (±) Complication COVID19 diagnosis Conclusive No? History COVID19 diagnosis Probable No Exposure COVID19 diagnosis No No Negative viral laboratory test Ruled out Yes</p>                                                                                                                                                                                                                                                                                                                                                                                                                                                                                                                                                                                                                                                                                                                          | descriptive |
| 470 | <b>rules2</b>                                                                                                                                                    | <p>Plausible Medical Event Rule Attribution PASC, 2+ diagnoses Conclusive MIS-C, 2+ diagnoses Conclusive PASC, 1 diagnosis Probable MIS-C, 1 diagnosis Probable Post-viral sequela Probable Inflammatory disorder Probable Cardiac disorder, non-congenital Probable Respiratory disorder Possible Nonspecific disorder, enriched in COVID-19 patients Possible</p>                                                                                                                                                                                                                                                                                                                                                                                                                                                                                                                                                                                                                                                                                                                                                                                                                                                                              | descriptive |
| 471 | <b>rules3</b>                                                                                                                                                    | <p>Mechanism Attribution Fact references SARS-CoV-2 Conclusive Rare fact, enriched in COVID-19 Probable Fact attributed to rare cause¶, enriched in COVID-19 Probable Common fact§, enriched in COVID-19, following COVID-19 Probable Common fact§, enriched in COVID-19 Possible Negative viral testing Ruled out for 90 days ¶Rare Facts Include: Rheumatic conditions Non-stomatitis herpetic/chronic viral conditions - reactivation Non-murmur/non-congenital cardiac conditions - exclude silent conditions that are likely incidentally ascertained post-COVID-19 § Common facts include: Two or more diagnoses within the same cluster on different dates, each ≥28 days after the cohort entry date and separated by at least 28 days, of: Abdominal pain - new-onset only, washout after 2019-01-01 Abnormal liver enzymes Acute kidney injury Acute respiratory distress syndrome Arrhythmias Cardiovascular signs and symptoms Changes in taste and smell Chest pain Cognitive function Fatigue and malaise Fever Fluid/electrolyte disturbance Generalized pain Hair loss Headache Heart disease (incl. pericarditis) Musculoskeletal Myocarditis Myositis Respiratory signs and symptoms Skin Thrombophlebitis/thromboembolism</p> | descriptive |

|                                                                       |                                                                                                             |                                                                                                                                                                                                                                                                     |                                                                                                                                                                                                                                                                                                                                                                                                                                                                                                                                                                         |   |                                                                            |   |                                                                                       |   |                                                    |   |                                                                        |   |                                                             |
|-----------------------------------------------------------------------|-------------------------------------------------------------------------------------------------------------|---------------------------------------------------------------------------------------------------------------------------------------------------------------------------------------------------------------------------------------------------------------------|-------------------------------------------------------------------------------------------------------------------------------------------------------------------------------------------------------------------------------------------------------------------------------------------------------------------------------------------------------------------------------------------------------------------------------------------------------------------------------------------------------------------------------------------------------------------------|---|----------------------------------------------------------------------------|---|---------------------------------------------------------------------------------------|---|----------------------------------------------------|---|------------------------------------------------------------------------|---|-------------------------------------------------------------|
| 472                                                                   | <p><b>clinical_pasc_determination</b></p>                                                                   | <p>Section Header: <i>Determination of PASC: Based on the information that was collected by the chart reviewer, use the above algorithm rules to determine whether this patient had PASC.</i></p> <p>Based on the algorithm logic, does this patient have PASC?</p> | <p>dropdown, Required</p> <table border="1"> <tr> <td>1</td> <td>Conclusive- Results establish the presence of PASC with highest confidence</td> </tr> <tr> <td>2</td> <td>Probable- Results indicate the presence of PASC is significantly more likely than not</td> </tr> <tr> <td>3</td> <td>Possible- Results suggest that PASC may be present</td> </tr> <tr> <td>4</td> <td>No Evidence- Results provide no information about the presence of PASC</td> </tr> <tr> <td>5</td> <td>Ruled Out- Results indicate that PASC is likely not present</td> </tr> </table> | 1 | Conclusive- Results establish the presence of PASC with highest confidence | 2 | Probable- Results indicate the presence of PASC is significantly more likely than not | 3 | Possible- Results suggest that PASC may be present | 4 | No Evidence- Results provide no information about the presence of PASC | 5 | Ruled Out- Results indicate that PASC is likely not present |
| 1                                                                     | Conclusive- Results establish the presence of PASC with highest confidence                                  |                                                                                                                                                                                                                                                                     |                                                                                                                                                                                                                                                                                                                                                                                                                                                                                                                                                                         |   |                                                                            |   |                                                                                       |   |                                                    |   |                                                                        |   |                                                             |
| 2                                                                     | Probable- Results indicate the presence of PASC is significantly more likely than not                       |                                                                                                                                                                                                                                                                     |                                                                                                                                                                                                                                                                                                                                                                                                                                                                                                                                                                         |   |                                                                            |   |                                                                                       |   |                                                    |   |                                                                        |   |                                                             |
| 3                                                                     | Possible- Results suggest that PASC may be present                                                          |                                                                                                                                                                                                                                                                     |                                                                                                                                                                                                                                                                                                                                                                                                                                                                                                                                                                         |   |                                                                            |   |                                                                                       |   |                                                    |   |                                                                        |   |                                                             |
| 4                                                                     | No Evidence- Results provide no information about the presence of PASC                                      |                                                                                                                                                                                                                                                                     |                                                                                                                                                                                                                                                                                                                                                                                                                                                                                                                                                                         |   |                                                                            |   |                                                                                       |   |                                                    |   |                                                                        |   |                                                             |
| 5                                                                     | Ruled Out- Results indicate that PASC is likely not present                                                 |                                                                                                                                                                                                                                                                     |                                                                                                                                                                                                                                                                                                                                                                                                                                                                                                                                                                         |   |                                                                            |   |                                                                                       |   |                                                    |   |                                                                        |   |                                                             |
| 473                                                                   | <p><b>pasc_definite_clin_adj</b></p> <p>Show the field ONLY if:<br/>[clinical_pasc_determination] = '1'</p> | <p>Please explain why this patient definitely has PASC:</p>                                                                                                                                                                                                         | <p>notes, Required</p>                                                                                                                                                                                                                                                                                                                                                                                                                                                                                                                                                  |   |                                                                            |   |                                                                                       |   |                                                    |   |                                                                        |   |                                                             |
| 474                                                                   | <p><b>pasc_probable_clin_adj</b></p> <p>Show the field ONLY if:<br/>[clinical_pasc_determination] = '2'</p> | <p>Please explain why this patient probably has PASC:</p>                                                                                                                                                                                                           | <p>notes, Required</p>                                                                                                                                                                                                                                                                                                                                                                                                                                                                                                                                                  |   |                                                                            |   |                                                                                       |   |                                                    |   |                                                                        |   |                                                             |
| 475                                                                   | <p><b>pasc_possible_clin_adj</b></p> <p>Show the field ONLY if:<br/>[clinical_pasc_determination] = '3'</p> | <p>Please explain why this patient possibly has PASC:</p>                                                                                                                                                                                                           | <p>notes, Required</p>                                                                                                                                                                                                                                                                                                                                                                                                                                                                                                                                                  |   |                                                                            |   |                                                                                       |   |                                                    |   |                                                                        |   |                                                             |
| 476                                                                   | <p><b>pasc_negative_clin_adj</b></p> <p>Show the field ONLY if:<br/>[clinical_pasc_determination] = '4'</p> | <p>Please explain why this patient did not have PASC:</p>                                                                                                                                                                                                           | <p>notes, Required</p>                                                                                                                                                                                                                                                                                                                                                                                                                                                                                                                                                  |   |                                                                            |   |                                                                                       |   |                                                    |   |                                                                        |   |                                                             |
| 477                                                                   | <p><b>comments_clin_adj</b></p>                                                                             | <p>Section Header: <i>Additional Comments</i></p> <p>Please add any additional comments.</p>                                                                                                                                                                        | <p>notes</p>                                                                                                                                                                                                                                                                                                                                                                                                                                                                                                                                                            |   |                                                                            |   |                                                                                       |   |                                                    |   |                                                                        |   |                                                             |
| 478                                                                   | <p><b>clinician_adjudication_complete</b></p>                                                               | <p>Section Header: <i>Form Status</i></p> <p>Complete?</p>                                                                                                                                                                                                          | <p>dropdown</p> <table border="1"> <tr> <td>0</td> <td>Incomplete</td> </tr> <tr> <td>1</td> <td>Unverified</td> </tr> <tr> <td>2</td> <td>Complete</td> </tr> </table>                                                                                                                                                                                                                                                                                                                                                                                                 | 0 | Incomplete                                                                 | 1 | Unverified                                                                            | 2 | Complete                                           |   |                                                                        |   |                                                             |
| 0                                                                     | Incomplete                                                                                                  |                                                                                                                                                                                                                                                                     |                                                                                                                                                                                                                                                                                                                                                                                                                                                                                                                                                                         |   |                                                                            |   |                                                                                       |   |                                                    |   |                                                                        |   |                                                             |
| 1                                                                     | Unverified                                                                                                  |                                                                                                                                                                                                                                                                     |                                                                                                                                                                                                                                                                                                                                                                                                                                                                                                                                                                         |   |                                                                            |   |                                                                                       |   |                                                    |   |                                                                        |   |                                                             |
| 2                                                                     | Complete                                                                                                    |                                                                                                                                                                                                                                                                     |                                                                                                                                                                                                                                                                                                                                                                                                                                                                                                                                                                         |   |                                                                            |   |                                                                                       |   |                                                    |   |                                                                        |   |                                                             |
| <p><b>Instrument: Algorithm comparison (algorithm_comparison)</b></p> |                                                                                                             |                                                                                                                                                                                                                                                                     | <p>[collapsed]</p>                                                                                                                                                                                                                                                                                                                                                                                                                                                                                                                                                      |   |                                                                            |   |                                                                                       |   |                                                    |   |                                                                        |   |                                                             |
